# Supplementary material for: On the reactivity of Al-group 11 (Cu, Ag, Au) bonds
Source: Royal Society of Chemistry journal article supplement (doi:10.1039/d2dt00404f), 2022-01-01
Supplement: d2dt00404f1.pdf [file d2dt00404f1.pdf]

## Supporting Information for

### On the Reactivity of Al-Group 11 (Cu, Ag, Au) Bonds

Han-Ying Liu, Samuel E. Neale, Michael S. Hill,\* Mary F. Mahon\* and Claire L. M<sup>c</sup>Mullin\*

*Department of Chemistry, University of Bath, Claverton Down, Bath, BA2 7AY, UK*

#### 1 Experimental and Supplementary Information

##### 1.1 General information

Unless stated otherwise, all the experiments were conducted using standard Schlenk line and/or glovebox techniques under an inert atmosphere of argon. NMR spectra were recorded with an Agilent ProPulse spectrometer (<sup>1</sup>H at 500 MHz, <sup>13</sup>C at 126 MHz, <sup>31</sup>P at 202 MHz). The spectra are referenced relative to residual protio solvent resonances. Elemental analyses were performed at Elemental Microanalysis Ltd., Okehampton, Devon, UK. Solvents were dried by passage through a commercially available solvent purification system and stored under argon in ampoules over 4 Å molecular sieves. C<sub>6</sub>D<sub>6</sub> was purchased from Sigma-Aldrich, dried over a potassium mirror before distilling and storage over molecular sieves. [ $\{\text{SiN}^{\text{Dipp}}\}\text{AlK}\]_2$  (**3**),<sup>1</sup> *N,N'*-diisopropyl-4,5-dimethyl-2-ylidene (NHC<sup>*i*Pr</sup>),<sup>2</sup> <sup>c</sup>CAACA<sub>g</sub>Cl,<sup>3</sup> *N,N'*-bis[2,6-bis(1-methylethyl)phenyl]-1,3-dihydro-2-ylidene (IPr)<sup>4</sup> were prepared according to reported procedures. All other chemicals were purchased from Merck and used without further purification.

## Synthetic Procedures

### *Synthesis of $\{\text{SiN}^{\text{Dipp}}\}\text{Al-Cu}\{\text{IPr}\}$ (**13**)*

A solution of *N,N'*-bis{diisopropylphenyl}-2-ylidene (IPr, 0.388 g, 1.00 mmol) in toluene (25 mL) was added to a schlenk flask containing CuCl (0.099 g, 1.00 mmol). After stirring for 3 days at room temperature, the solution was put under vacuum to remove all volatile and afford an off-white solid. A solution of  $[\{\text{SiN}^{\text{Dipp}}\}\text{AlK}]_2$  (**3**, 0.560 g, 1.00 mmol) in hexane (40 mL) was then added to the Schlenk flask, affording a pale-yellow reaction mixture. The resulting mixture was then left stirring at room temperature overnight before filtering. The colourless filtrate was then collected, and all volatiles were removed *in vacuo* yielding **13** as an off-white solid. Yield 0.75g, 77%. No meaningful result was obtained for elemental analysis after multiple attempts.  $^1\text{H}$  NMR (500 MHz, 298 K, Benzene-*d*<sub>6</sub>)  $\delta$  7.20 (t,  $J = 7.8$  Hz, 2H, *p*-C<sub>6</sub>H<sub>3</sub> on IPr), 7.05 – 6.94 (m, 10H, C<sub>6</sub>H<sub>3</sub> on IPr and SiN<sup>Dipp</sup>), 6.05 (s, 2H, NCH on IPr), 3.90 (sept,  $J = 6.9$  Hz, 4H, CHMe<sub>2</sub> on SiN<sup>Dipp</sup>), 2.39 (sept,  $J = 6.9$  Hz, 4H, , CHMe<sub>2</sub> on IPr), 1.38 (d,  $J = 6.9$  Hz, 12H, CHMe<sub>2</sub> on SiN<sup>Dipp</sup>), 1.07 (s, 4H, SiCH<sub>2</sub>), 1.06 (d,  $J = 6.9$  Hz, 12H, CHMe<sub>2</sub> on SiN<sup>Dipp</sup>), 1.01 (d,  $J = 6.9$  Hz, 12H, CHMe<sub>2</sub> on IPr), 0.91 (d,  $J = 6.9$  Hz, 12H, CHMe<sub>2</sub> on IPr), 0.22 (s, 12H, SiMe<sub>2</sub>).  $^{13}\text{C}\{^1\text{H}\}$  NMR (126 MHz, 298 K, Benzene-*d*<sub>6</sub>)  $\delta$  185.1 (CuC<sub>carbene</sub>), 146.9 (C<sub>6</sub>H<sub>3</sub> on SiN<sup>Dipp</sup>), 146.3 (C<sub>6</sub>H<sub>3</sub> on SiN<sup>Dipp</sup>), 145.1 (C<sub>6</sub>H<sub>3</sub> on IPr), 136.0 (C<sub>6</sub>H<sub>3</sub> on IPr), 130.1 (C<sub>6</sub>H<sub>3</sub>), 124.5 (C<sub>6</sub>H<sub>3</sub> on IPr), 123.3 (C<sub>6</sub>H<sub>3</sub> on SiN<sup>Dipp</sup>), 123.0 (NCH on IPr), 122.5 (C<sub>6</sub>H<sub>3</sub>), 28.9 (CHMe<sub>2</sub> on IPr), 28.2 (CHMe<sub>2</sub> on SiN<sup>Dipp</sup>), 25.8 (CHMe<sub>2</sub> on SiN<sup>Dipp</sup>), 24.5 (CHMe<sub>2</sub> on IPr), 24.3 (CHMe<sub>2</sub> on IPr), 24.1 (CHMe<sub>2</sub> on SiN<sup>Dipp</sup>), 14.6 (SiCH<sub>2</sub>), 1.6 (SiMe<sub>2</sub>).

**Figure S1.**  $^1\text{H}$  NMR spectrum of **13**. (500 MHz, 298 K, Benzene- $d_6$ ) \*grease

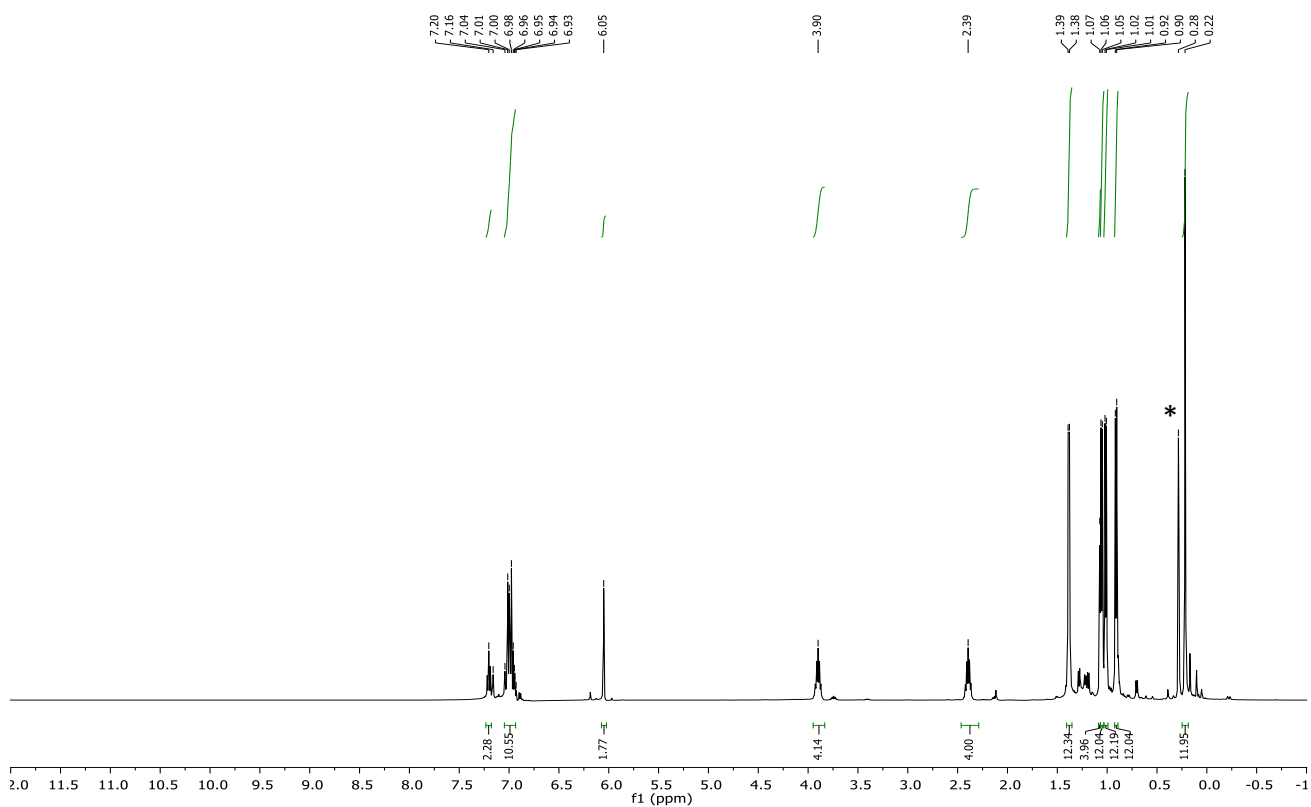

**Figure S2.**  $^{13}\text{C}\{^1\text{H}\}$  NMR spectrum of **13**. (126 MHz, 298 K, Benzene- $d_6$ )

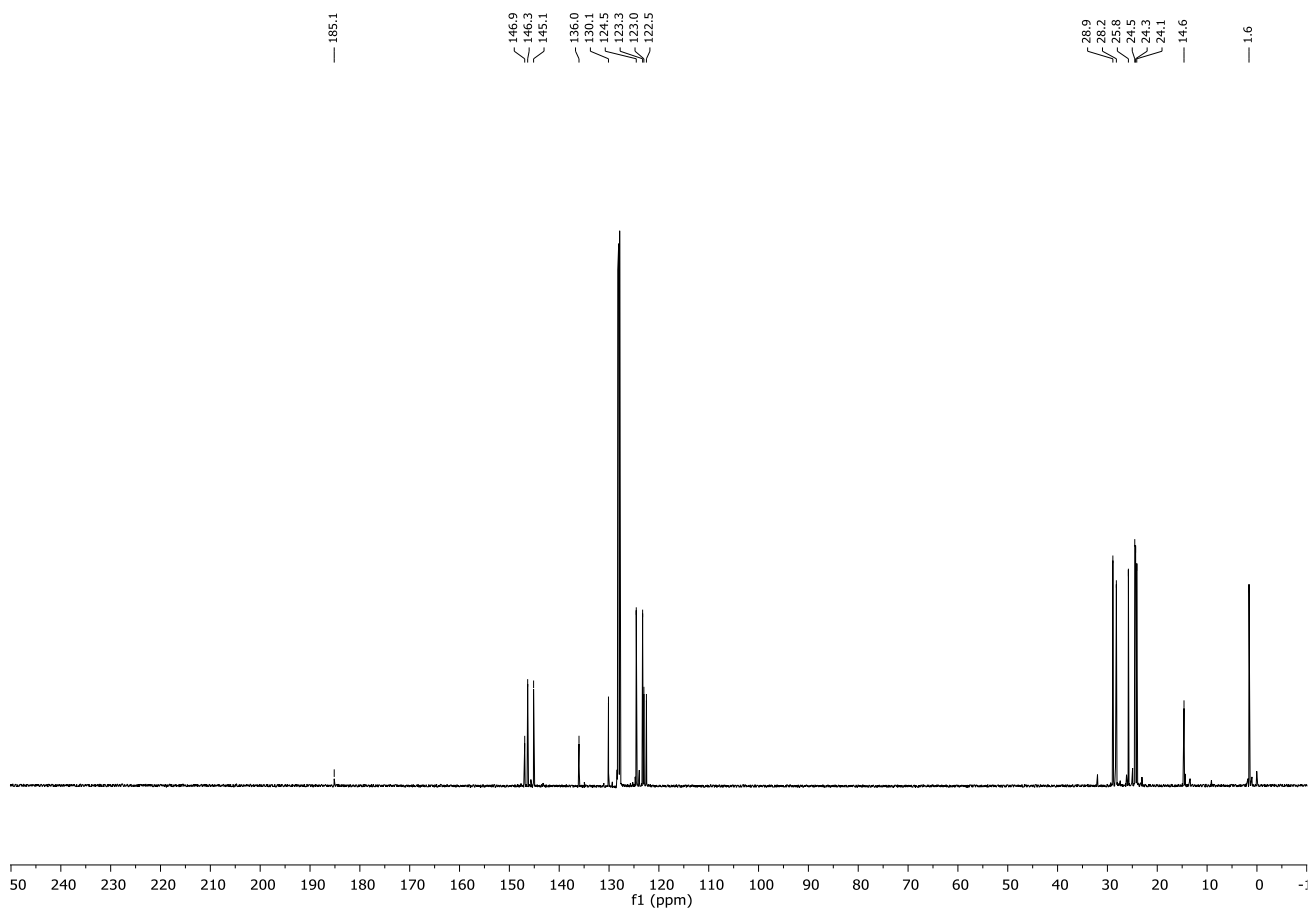

**Figure S3.**  $^1\text{H}$ - $^1\text{H}$  COSY NMR spectrum of **13**.

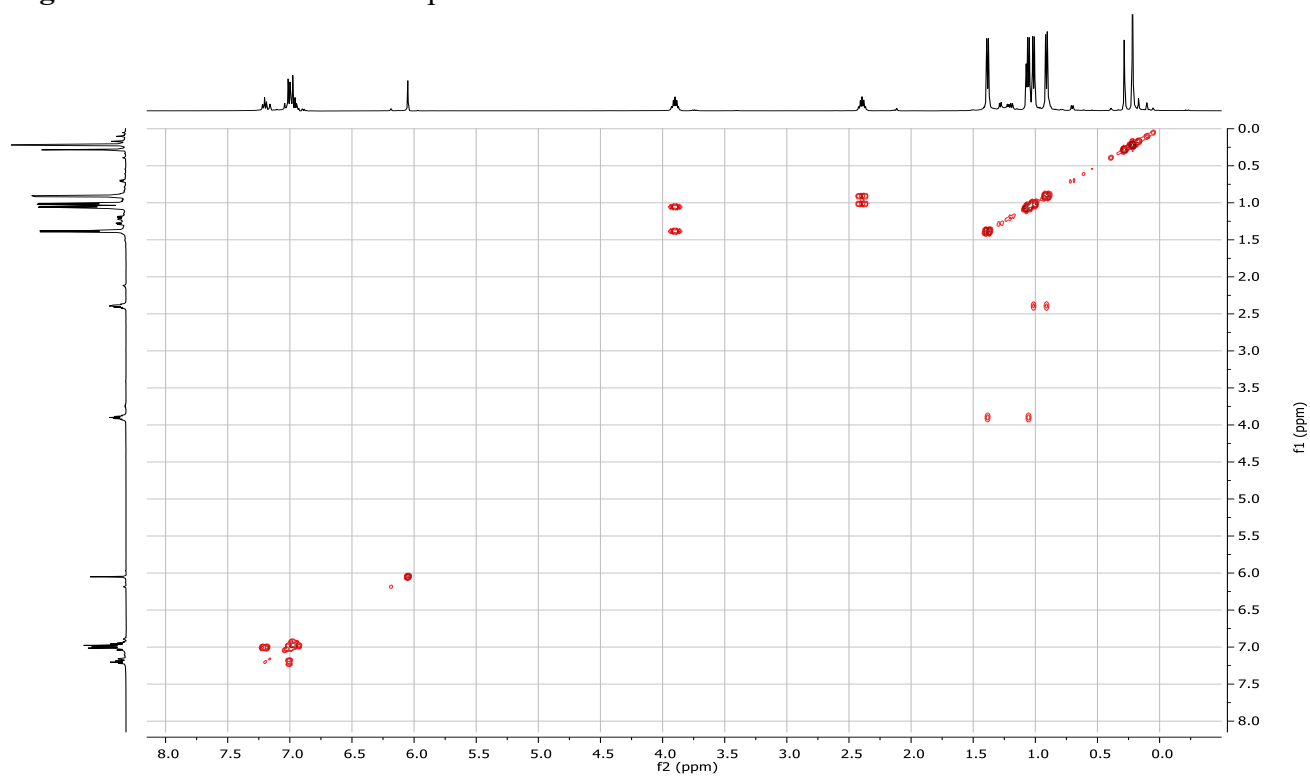

**Figure S4.**  $^1\text{H}$ - $^{13}\text{C}$  HSQC NMR spectrum of **13**.

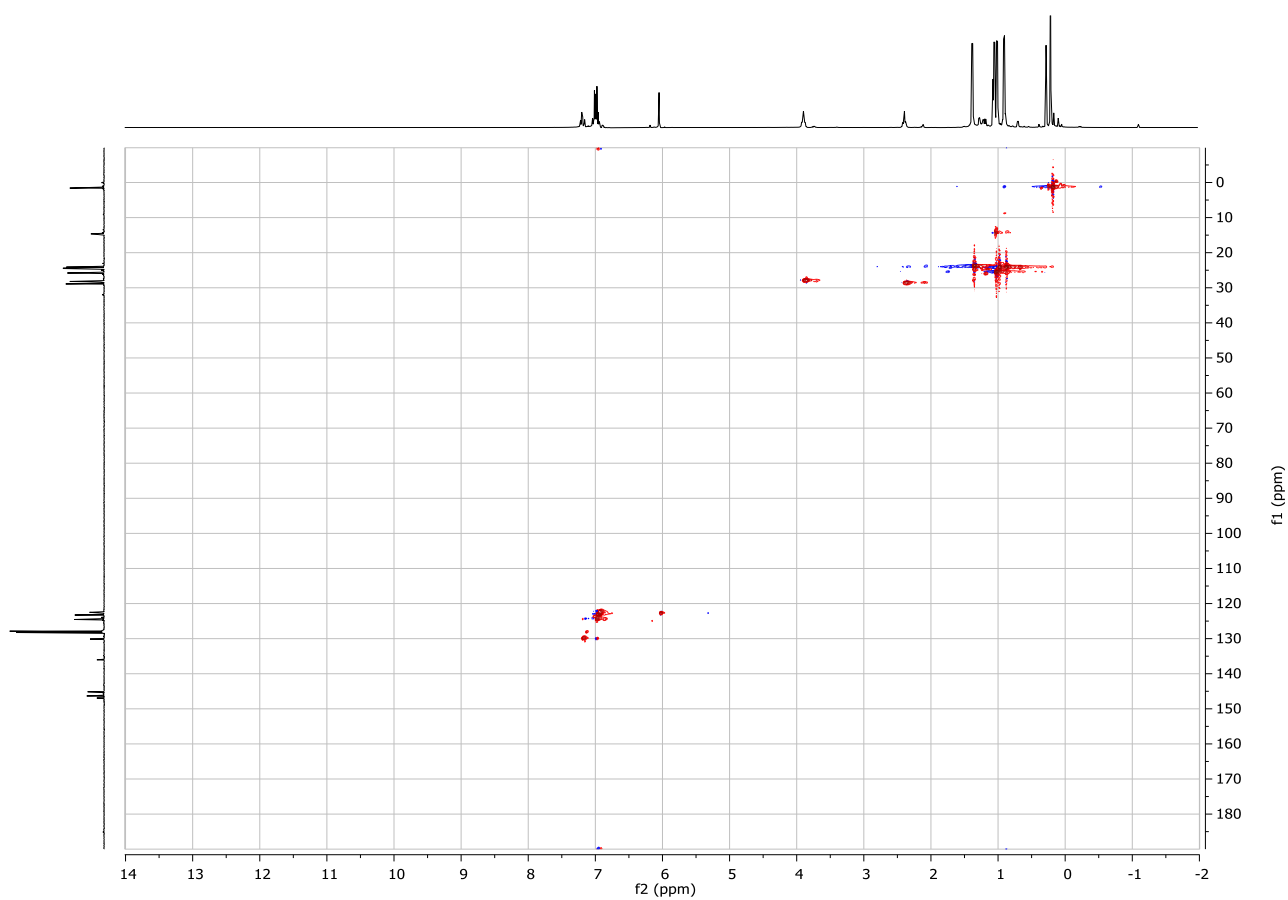

**Figure S5.**  $^1\text{H}$ - $^{13}\text{C}$  HMBC NMR spectrum of **13**.

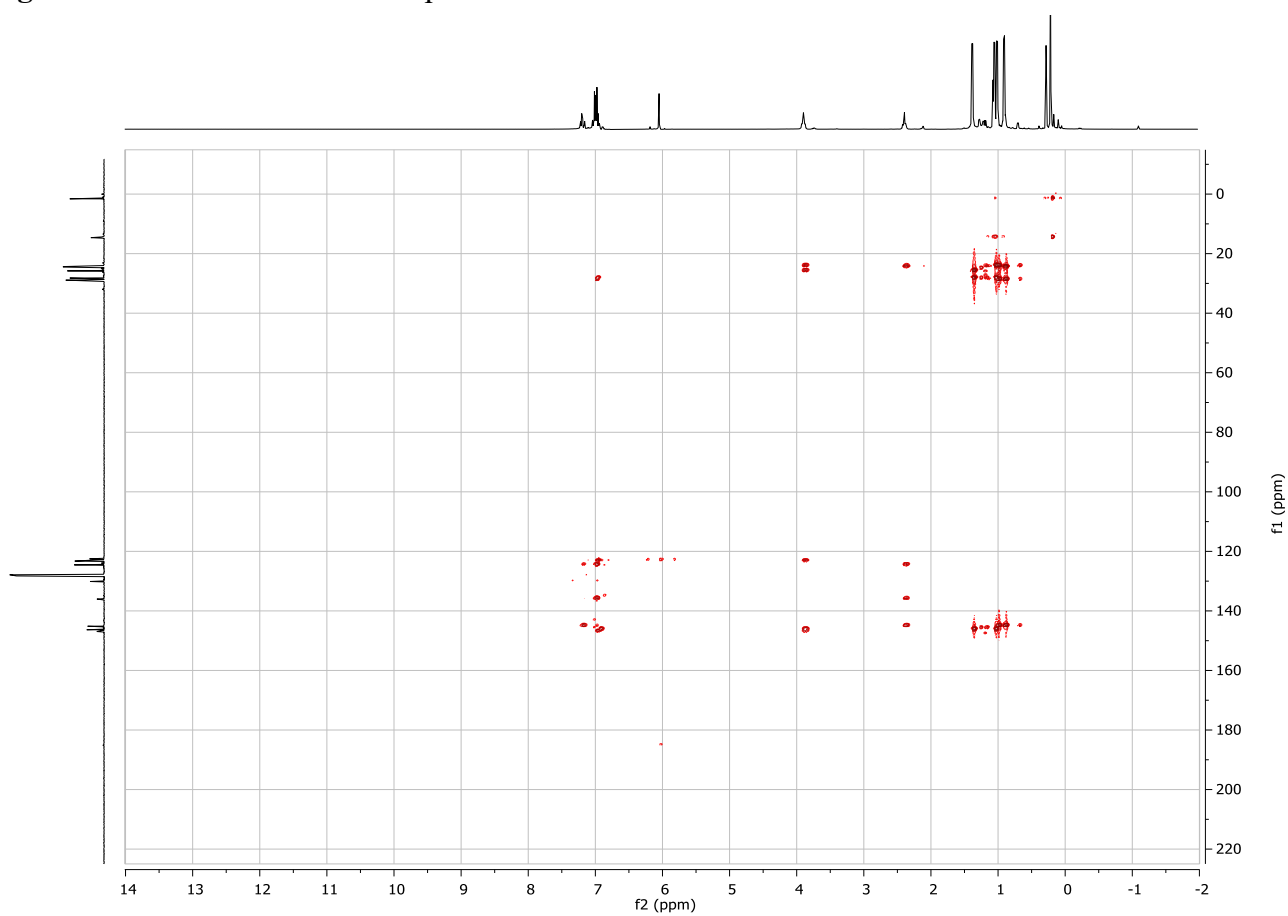

*Synthesis of  $\{\text{SiN}^{\text{Dipp}}\}\text{Al-C}(\text{N}^i\text{Pr})_2\text{-Cu}\{\text{IPr}\}$  (**14**)*

Inside a J Young's tube,  $\{\text{SiN}^{\text{Dipp}}\}\text{Al-Cu}\{\text{IPr}\}$  (**13**, 48.5mg, 0.05mmol) was dissolved in 0.4mL of  $\text{C}_6\text{D}_6$ , *N,N'*-diisopropylcarbodiimide (7.8 $\mu\text{L}$ , 0.05mmol) was then added *via* a micropipette. No significant change was observed in the  $^1\text{H}$  NMR spectrum when the reaction mixture was left at room temperature overnight. The reaction mixture was then kept at 40  $^\circ\text{C}$ , and full conversion into compound **14** in quantitative yields was determined by  $^1\text{H}$  NMR after 3 days.  $^1\text{H}$  NMR (500 MHz, 298 K, Benzene- $d_6$ )  $\delta$  7.14 – 7.12 (m, 2H, *p*- $\text{C}_6\text{H}_3$ ), 7.10-7.08 (m, 4H, *m*- $\text{C}_6\text{H}_3$ ), 7.06 – 7.02 (m, 2H, *p*- $\text{C}_6\text{H}_3$ ), 6.98 (d<sub>app</sub>, 4H, *m*- $\text{C}_6\text{H}_3$ ), 4.13 (s, 2H, NCH on IPr), 4.26-3.90(m, 4H, CHMe<sub>2</sub> on SiN<sup>Dipp</sup>), 3.38(sept, *J* = 6.9 Hz, 1H, NCHMe<sub>2</sub> on carbodiimide) 2.99 (sept, *J* = 6.9 Hz, 1H, NCHMe<sub>2</sub> on carbodiimide), 2.52 (sept, *J* = 6.8 Hz, 4H, CHMe<sub>2</sub> on IPr), 1.44-1.43 (m, 12H, CHMe<sub>2</sub> on SiN<sup>Dipp</sup>), 1.42 – 1.36 (m, 12H, CHMe<sub>2</sub> on SiN<sup>Dipp</sup>), 1.33 (d, *J* = 6.9 Hz, 6H, NCHMe<sub>2</sub> on carbodiimide), 1.28 (s, 4H, SiCH<sub>2</sub>), 1.23 (d, *J* = 6.9 Hz, 12H, CHMe<sub>2</sub> on IPr), 1.05 (d, *J* = 6.9 Hz, 6H, NCHMe<sub>2</sub> on carbodiimide), 0.94 (d, *J* = 6.8 Hz, 12H CHMe<sub>2</sub> on IPr), 0.33 – 0.02 (s, br, 12H, SiMe<sub>2</sub>) \*SiMe<sub>2</sub> peak overlapping with the grease.  $^{13}\text{C}\{^1\text{H}\}$  NMR (126 MHz, 298 K, Benzene- $d_6$ )  $\delta$  182.1 ( $\text{CuC}_{\text{carbene}}$ ), 149.6 (*i*- $\text{C}_6\text{H}_3$ ), 148.4 (*i*- $\text{C}_6\text{H}_3$ ), 146.7 (*o*- $\text{C}_6\text{H}_3$ ), 146.4(*o*- $\text{C}_6\text{H}_3$ ), 145.3(*o*- $\text{C}_6\text{H}_3$ ), 135.7 (*o*- $\text{C}_6\text{H}_3$ ), 130.7 (*m*- $\text{C}_6\text{H}_3$ ), 128.4 (*m*- $\text{C}_6\text{H}_3$ ), 124.6 (*m*- $\text{C}_6\text{H}_3$ ) 123.7 (*p*- $\text{C}_6\text{H}_3$ ), 123.6 (*p*- $\text{C}_6\text{H}_3$ ) , 123.4 (NCH on IPr), 122.5 (*m*- $\text{C}_6\text{H}_3$ ), 58.0 (NCHMe<sub>2</sub> on carbodiimide), 45.9 (NCHMe<sub>2</sub> on carbodiimide), 44.4 ((NCHMe<sub>2</sub> on carbodiimide), 28.9 (CHMe<sub>2</sub> on IPr), 27.8 (CHMe<sub>2</sub> on SiN<sup>Dipp</sup>), 27.4 (NCHMe<sub>2</sub> on carbodiimide), 26.2 (CHMe<sub>2</sub> on SiN<sup>Dipp</sup>), 26.1 (CHMe<sub>2</sub> on SiN<sup>Dipp</sup>), 24.8 (CHMe<sub>2</sub> on IPr), 23.8 (CHMe<sub>2</sub> on IPr), 15.1 (SiCH<sub>2</sub>), 1.4 (SiMe<sub>2</sub>).  $^{13}\text{C}$  resonance correlated to AlCN not observed.

**Figure S6.**  $^1\text{H}$  NMR spectrum of **14**. (500 MHz, 298 K, Benzene- $d_6$ ) \*grease

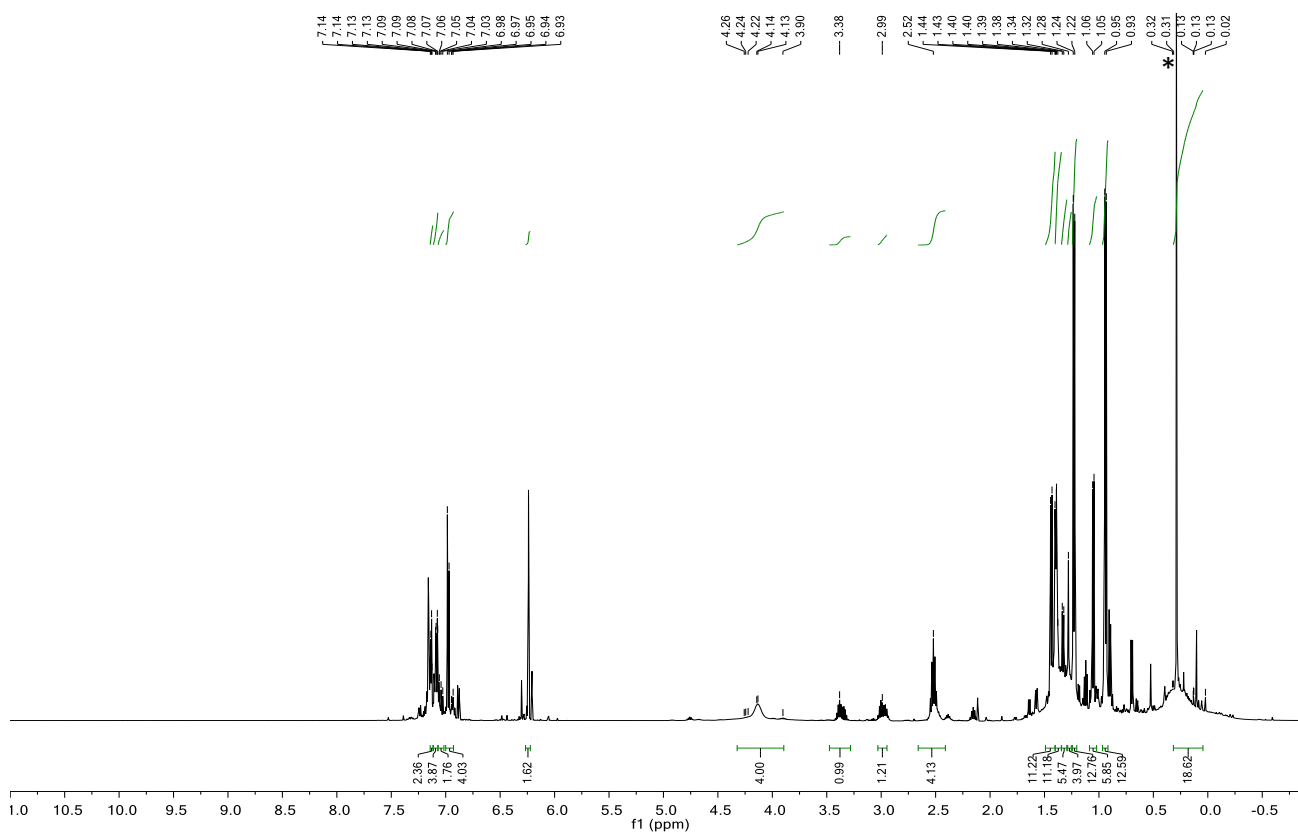

**Figure S7.**  $^{13}\text{C}\{^1\text{H}\}$  NMR spectrum of **14**. (126 MHz, 298 K, Benzene- $d_6$ )

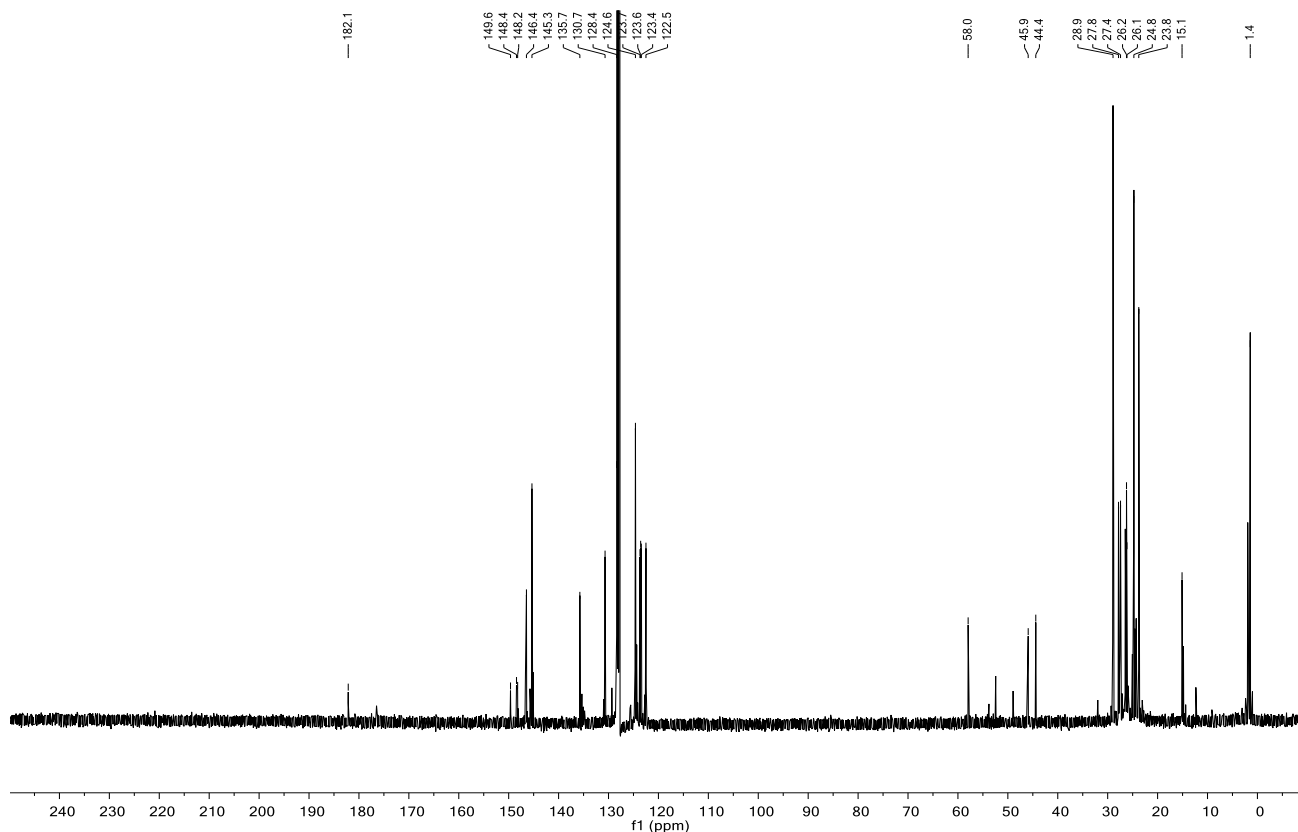

**Figure S8.**  $^1\text{H}$ - $^1\text{H}$  COSY NMR spectrum of **14**.

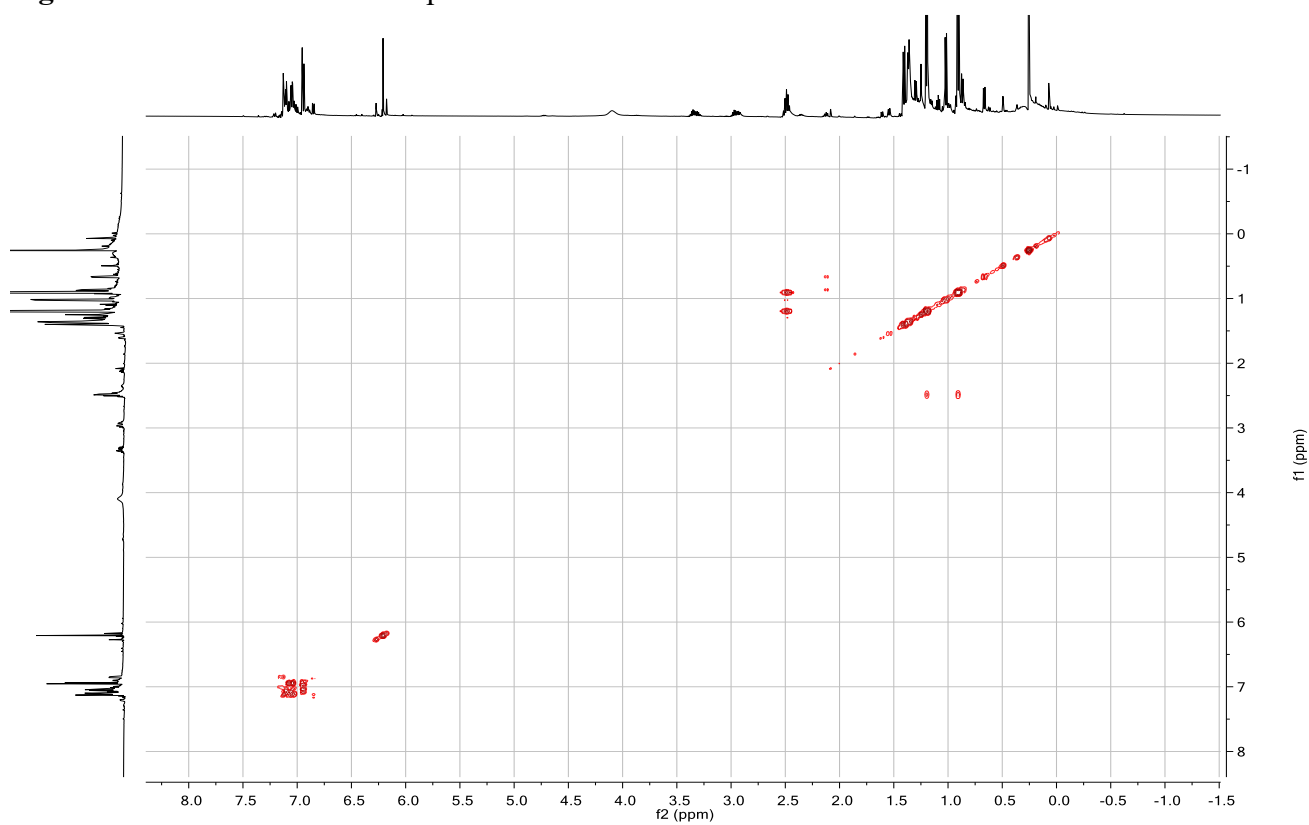

**Figure S9.**  $^1\text{H}$ - $^{13}\text{C}$  HSQC NMR spectrum of **14**.

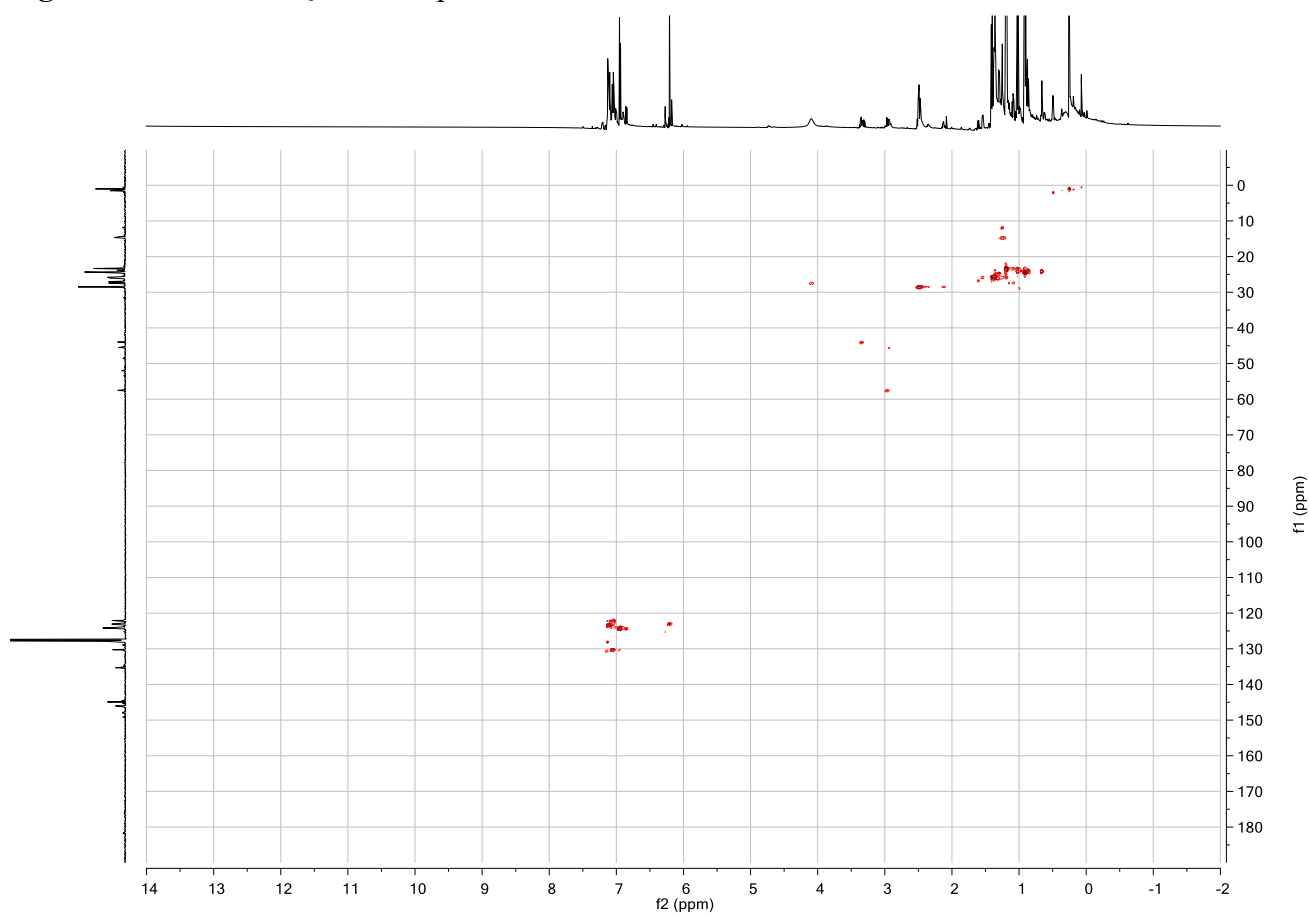



**Figure S10.**  $^1\text{H}$ - $^{13}\text{C}$  HMBC NMR spectrum of **14**.

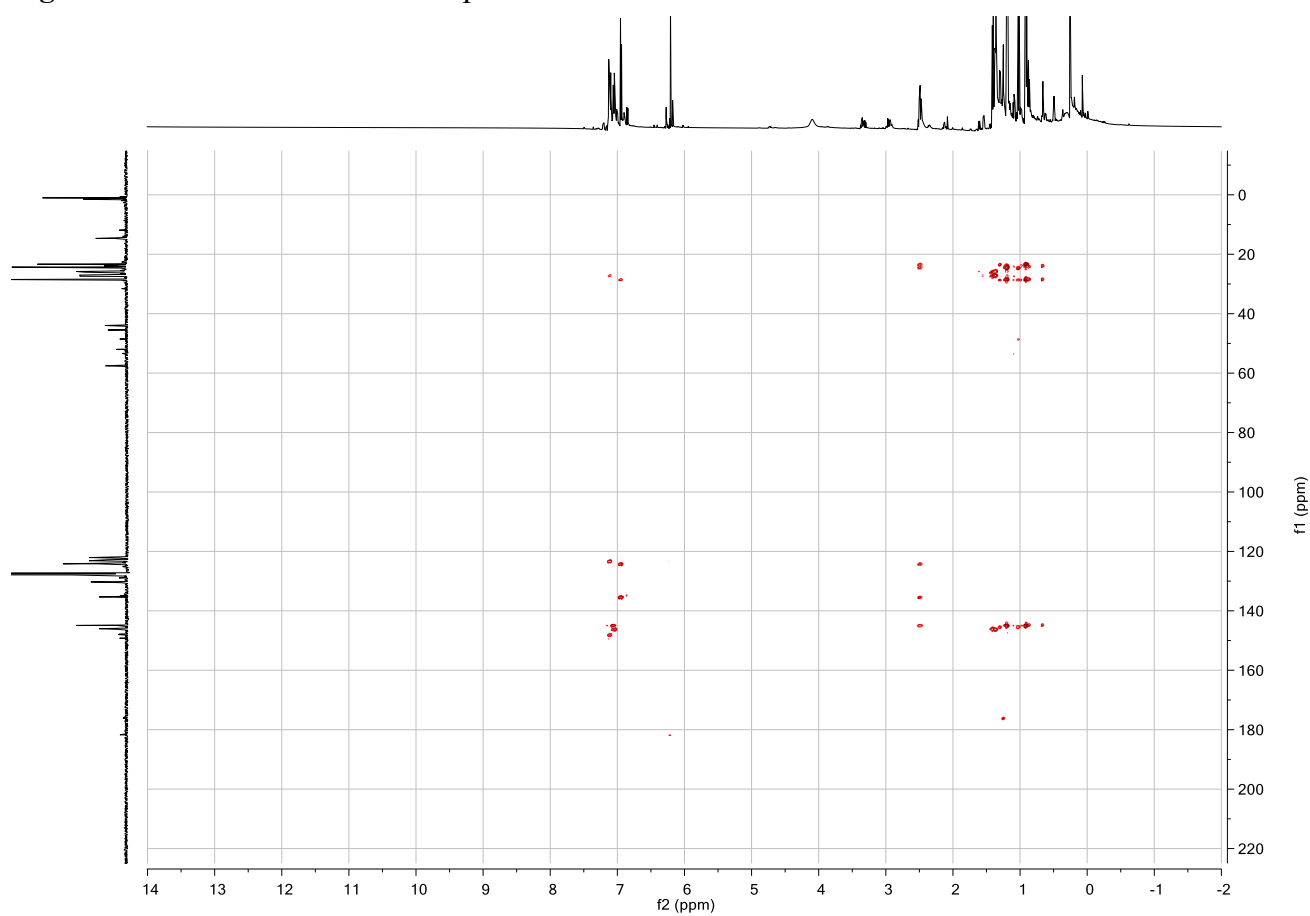

*Synthesis of {SiN<sup>Diipp</sup>}Al-O<sub>2</sub>C-Cu{IPr} (15)*

{SiN<sup>Diipp</sup>}Al-Cu{IPr} (**13**, 25 mg, 0.026mmol), was dissolved in 0.4mL of C<sub>6</sub>D<sub>6</sub> inside a J Young's tube. The solution was then degassed by three cycles of freeze-pump-thaw before the tube was charged with 2 atm of <sup>13</sup>CO<sub>2</sub>. Full Conversion of the starting material was determined by <sup>1</sup>H and <sup>13</sup>C NMR spectra within 30 minutes of the addition of the CO<sub>2</sub> to the solution. No meaningful result was obtained for elemental analysis after multiple attempts. <sup>1</sup>H NMR (500 MHz, 298 K, Benzene-*d*<sub>6</sub>) δ 7.25-7.22 (m, 2H, *p*-C<sub>6</sub>H<sub>3</sub>), 7.12 – 7.08 (m, 2H, *p*-C<sub>6</sub>H<sub>3</sub>), 7.04-7.01 (m, 8H, *m*-C<sub>6</sub>H<sub>3</sub>), 6.09 (s, 2H, NCH), 3.95 (sept, *J* = 6.8 Hz, 4H, CHMe<sub>2</sub> on SiN<sup>Diipp</sup>), 2.24 (sept, *J* = 6.9 Hz, 4H, CHMe<sub>2</sub> on IPr), 1.41 (d, *J* = 6.8 Hz, 12H, CHMe<sub>2</sub> on SiN<sup>Diipp</sup>), 1.20 (s, 4H, SiCH<sub>2</sub>), 1.13 (d, *J* = 6.8 Hz, 12H, CHMe<sub>2</sub> on SiN<sup>Diipp</sup>), 1.06 (d, *J* = 6.9 Hz, 12H CHMe<sub>2</sub> on IPr), 1.01 (d, *J* = 6.9 Hz, 12H CHMe<sub>2</sub> on IPr), 0.29 (s, 12H, SiMe<sub>2</sub>)\*overlapping with grease. <sup>13</sup>C NMR (126 MHz, 298 K, Benzene-*d*<sub>6</sub>) δ 234.0 (CuCO<sub>2</sub>), 165.8 (*i*-C<sub>6</sub>H<sub>3</sub>), 163.2 (*i*-C<sub>6</sub>H<sub>3</sub>), 146.5 (*o*-C<sub>6</sub>H<sub>3</sub>), 145.4 (*o*-C<sub>6</sub>H<sub>3</sub>), 124.3 (*m*-C<sub>6</sub>H<sub>3</sub>), 123.3 (*m*-C<sub>6</sub>H<sub>3</sub>), 122.8 (*p*-C<sub>6</sub>H<sub>3</sub>), 122.7 (*p*-C<sub>6</sub>H<sub>3</sub>), 28.8 (CHMe<sub>2</sub>), 27.7 (CHMe<sub>2</sub>), 25.5 (CHMe<sub>2</sub>), 25.1 (CHMe<sub>2</sub>), 23.9 (CHMe<sub>2</sub>), 23.7 (CHMe<sub>2</sub>), 14.4 (SiCH<sub>2</sub>), 0.5 (SiMe<sub>2</sub>) <sup>13</sup>C resonance correlated to CuC<sub>carbene</sub> was not observed.

Figure S11.  $^1\text{H}$  NMR spectrum of **15**. (500 MHz, 298 K, Benzene- $d_6$ ) \*grease

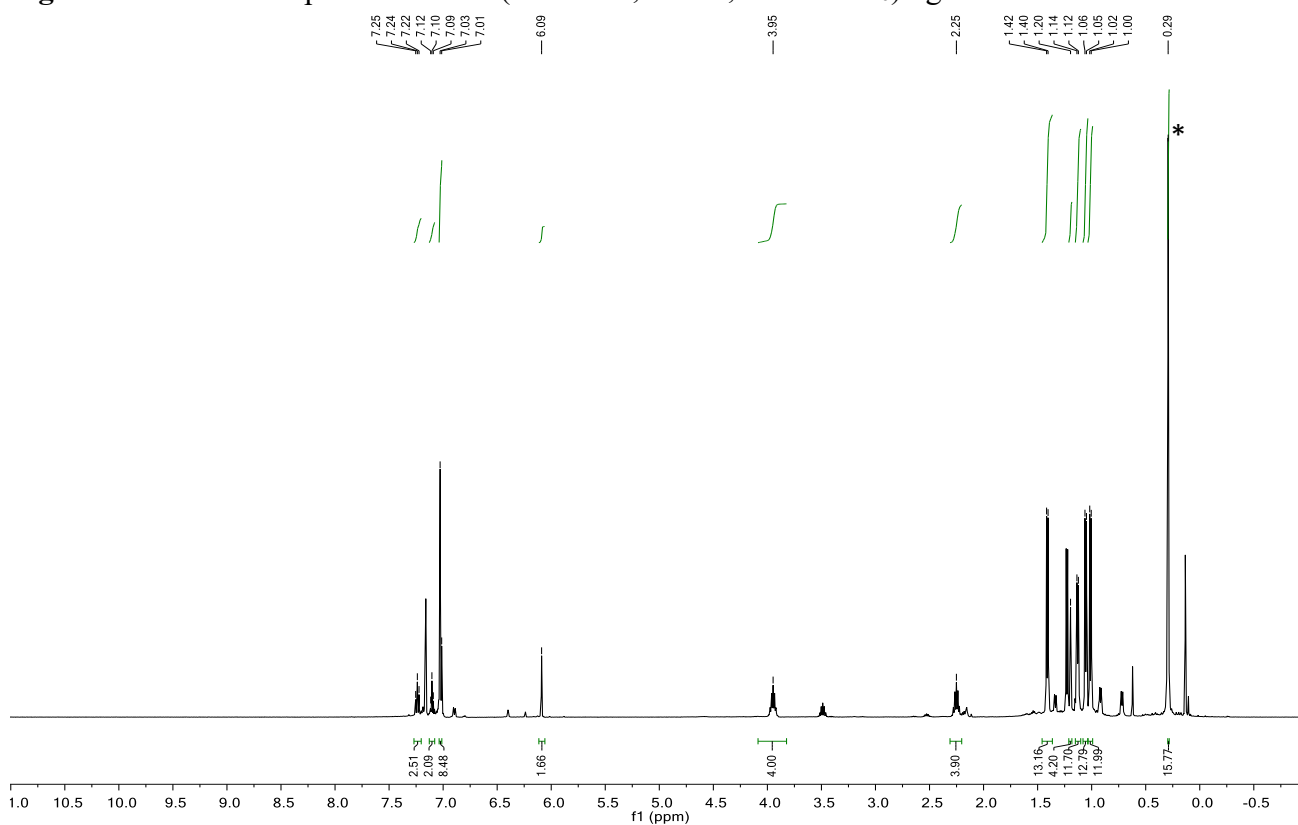

Figure S12.  $^{13}\text{C}\{^1\text{H}\}$  NMR spectrum of **15**. (126 MHz, 298 K, Benzene- $d_6$ ) + residual  $^{13}\text{CO}_2$  \*grease

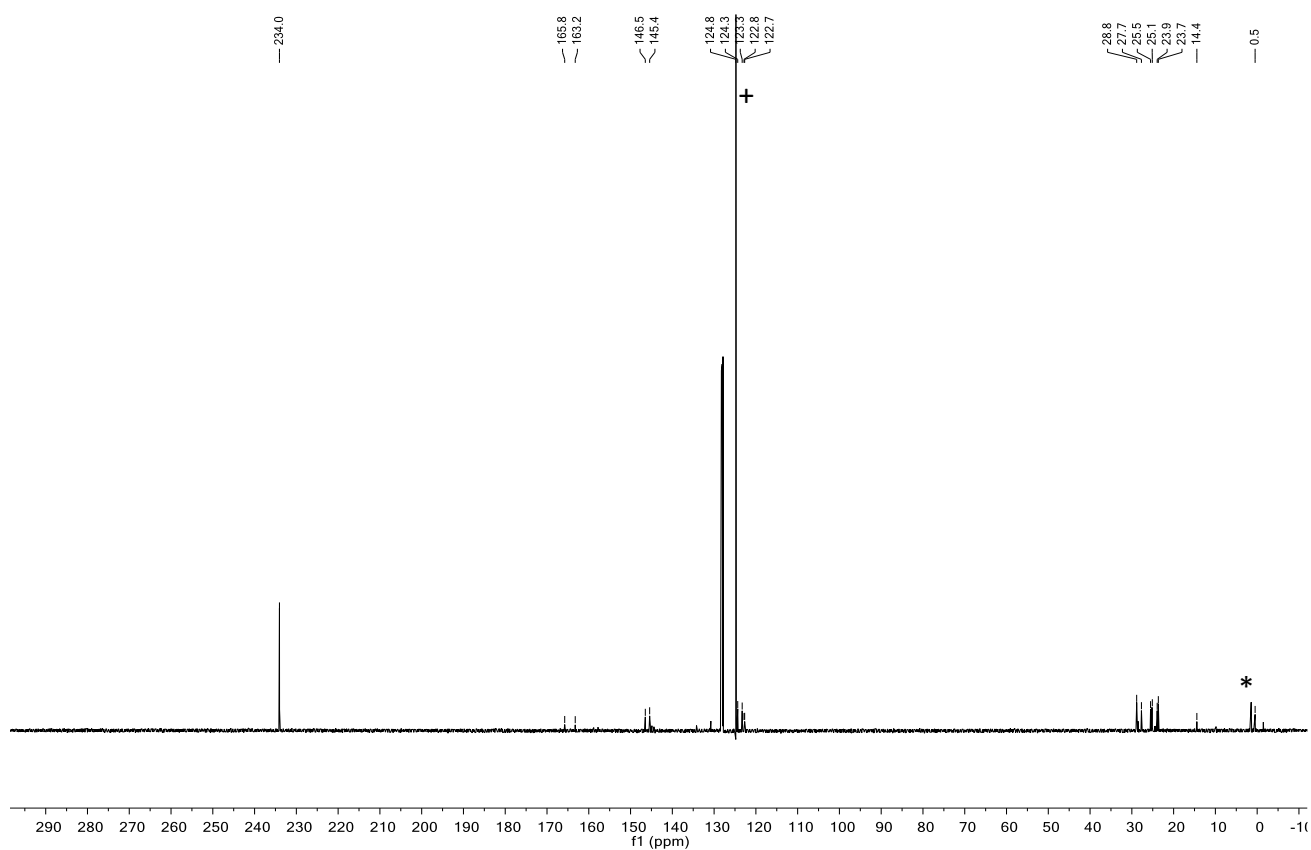

*Synthesis of {SiN<sup>Dipp</sup>}Al-Ag{NHC<sup>iPr</sup>} (16)*

Hexane (25 mL) was cannula transferred into a foil wrapped Schlenk flask containing *N,N'*-diisopropyl-4,5-dimethyl-2-ylidene (NHC<sup>iPr</sup>, 0.180 g, 1.00 mmol) and AgCl (0.143 g, 1.00 mmol). After the suspension was stirred for 3 days at 40°C, a solution of [{SiN<sup>Dipp</sup>}AlK]<sub>2</sub> (**3**, 0.560 g, 1.00 mmol) in hexane (20 mL) was then added to the stirring white suspension, and the resulting pale yellow reaction mixture was stirred at room temperature overnight before filtering. The colourless filtrate was then collected, all volatiles were then removed *in vacuo* yielding **16** as an off-white solid. Yield 0.528 g, 65.2%. Anal Calc'd for C<sub>41</sub>H<sub>70</sub>AlAgN<sub>4</sub>Si<sub>2</sub> (**16**, 810.06) C, 60.79; H, 8.71; N, 6.92 %. Found: C, 60.04; H, 8.32; N, 6.63 %. <sup>1</sup>H NMR (500 MHz, 298 K, Benzene-*d*<sub>6</sub>) δ 7.16-7.14 (m, 4H, *m*-C<sub>6</sub>H<sub>3</sub>), 7.06 – 6.99 (m, 2H, *p*-C<sub>6</sub>H<sub>3</sub>), 4.17 (sept, *J* = 6.9 Hz, 4H, CHMe<sub>2</sub> on SiN<sup>Dipp</sup>), 3.63 (sept, *J* = 6.7 Hz, 2H, NCHMe<sub>2</sub> on NHC<sup>iPr</sup>), 1.51 (d, *J* = 6.9 Hz, 12H, CHMe<sub>2</sub> on SiN<sup>Dipp</sup>), 1.47 (d, *J* = 6.9 Hz, 12H, CHMe<sub>2</sub> on SiN<sup>Dipp</sup>), 1.34 (s, 6H, NCM<sub>e</sub>), 1.27 (s, 4H, SiCH<sub>2</sub>), 1.00 (d, *J* = 6.7 Hz, 12H, NCHMe<sub>2</sub> on NHC<sup>iPr</sup>), 0.37 (s, 12H, SiMe<sub>2</sub>). <sup>13</sup>C{<sup>1</sup>H} NMR (126 MHz, 298 K, Benzene-*d*<sub>6</sub>) δ 230.5 (AgC<sub>carbene</sub>). 147.4(*o*-C<sub>6</sub>H<sub>3</sub>), 146.6 (*i*-C<sub>6</sub>H<sub>3</sub>), 123.1 (*m*-C<sub>6</sub>H<sub>3</sub>), 122.8 (*p*-C<sub>6</sub>H<sub>3</sub>), 122.5 (NCMe), 49.7 (NCHMe<sub>2</sub> on NHC<sup>iPr</sup>), 28.3 (CHMe<sub>2</sub> on SiN<sup>Dipp</sup>), 26.0 (CHMe<sub>2</sub> on SiN<sup>Dipp</sup>), 24.7 (CHMe<sub>2</sub> on SiN<sup>Dipp</sup>), 24.2 (NCHMe<sub>2</sub> on NHC<sup>iPr</sup>), 14.3 (SiCH<sub>2</sub>), 8.7 (NCMe), 1.3 (SiMe<sub>2</sub>).

**Figure S13.**  $^1\text{H}$  NMR spectrum of **16**. (500 MHz, 298 K, Benzene- $d_6$ )

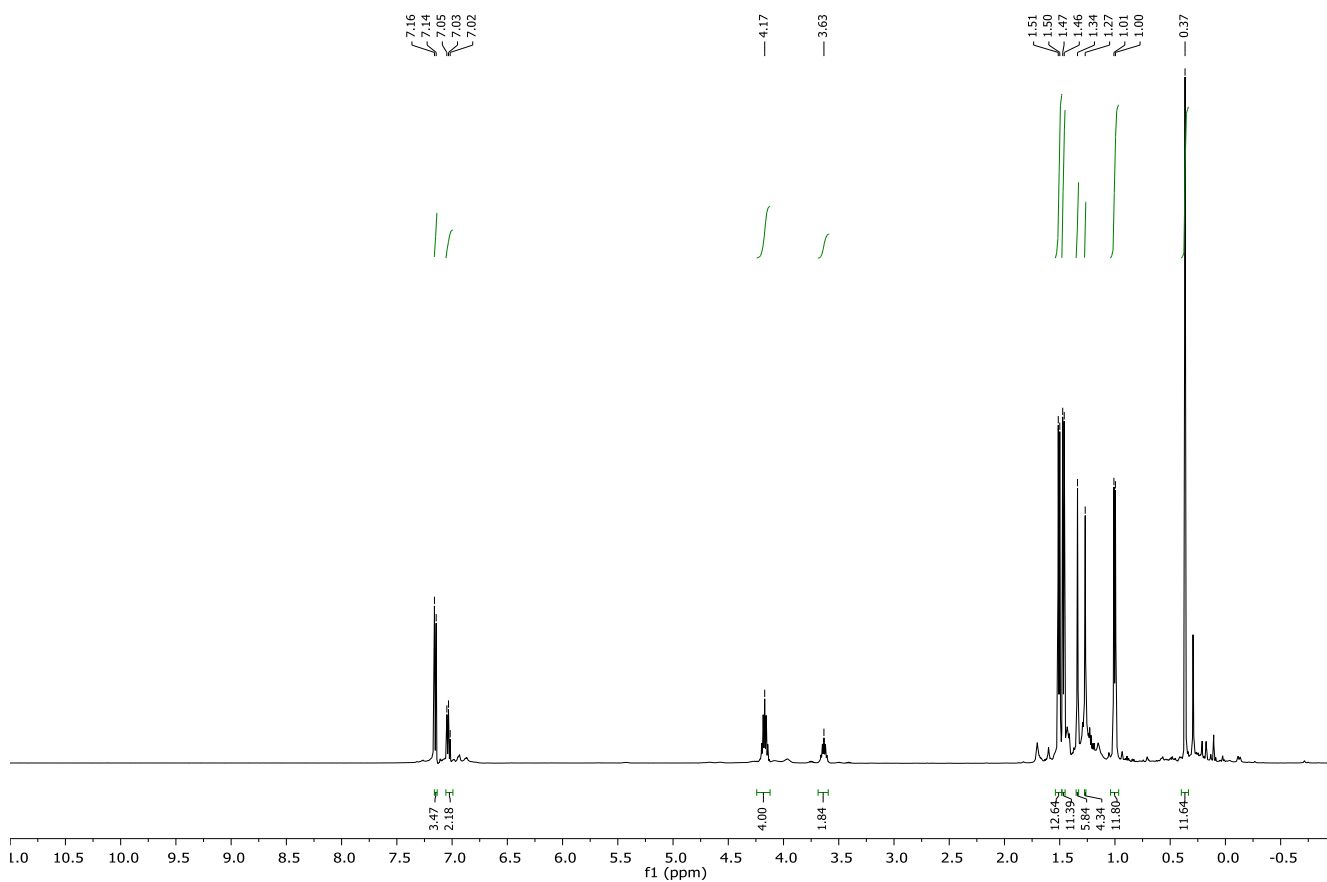

**Figure S14.**  $^{13}\text{C}\{^1\text{H}\}$  NMR spectrum of **16**. (126 MHz, 298 K, Benzene- $d_6$ )

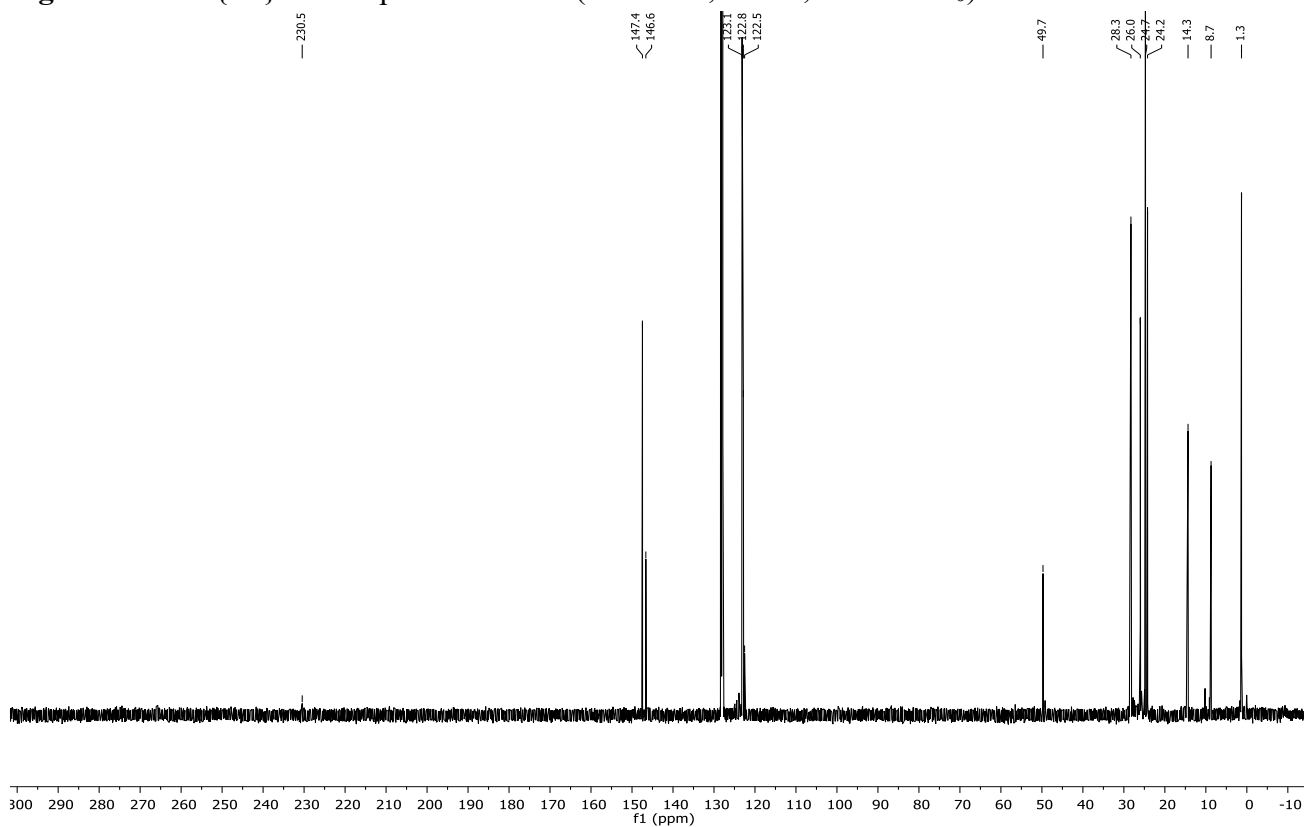

Figure S15.  $^1\text{H}$ - $^1\text{H}$  COSY NMR spectrum of 16.

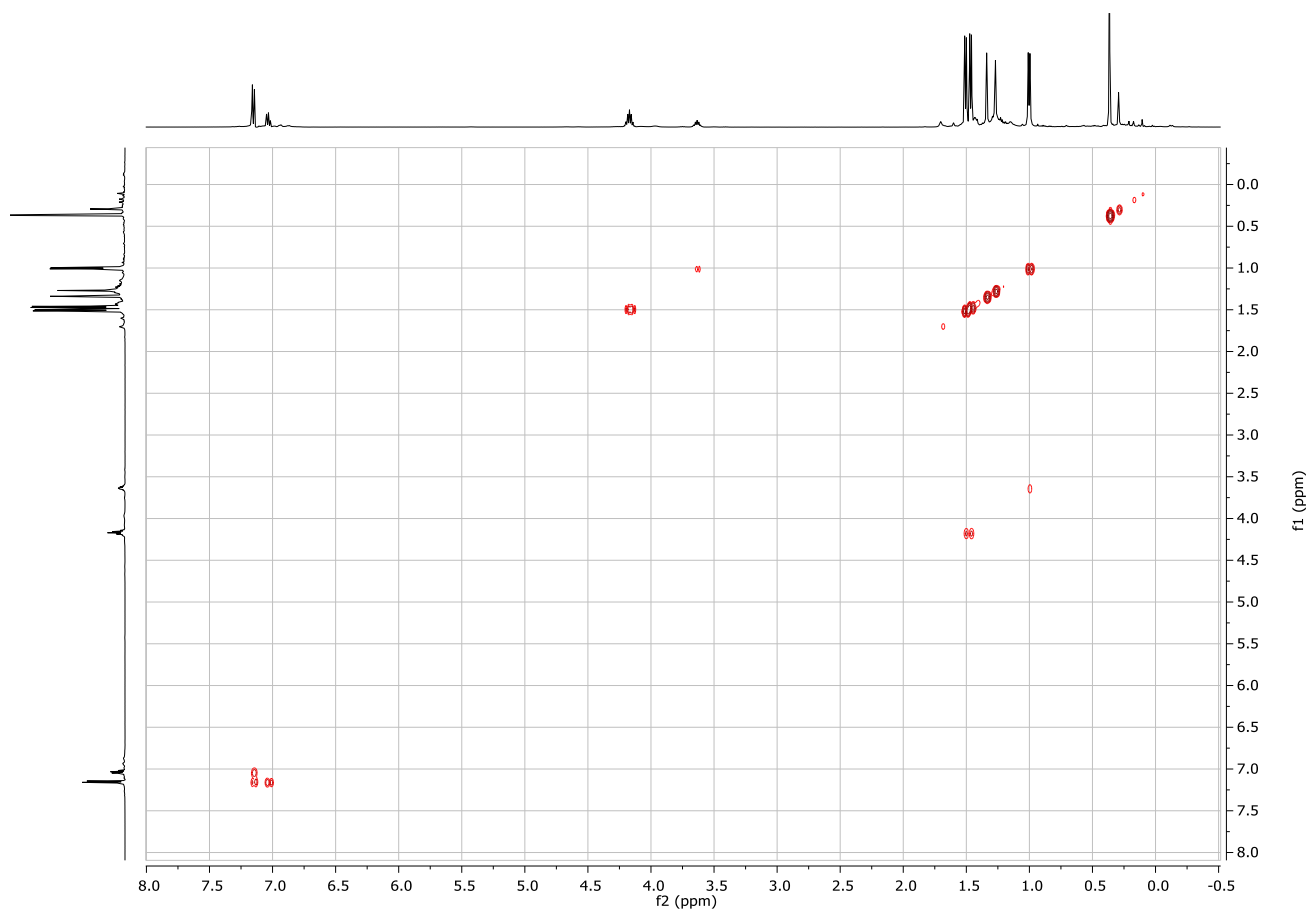

Figure S16.  $^1\text{H}$ - $^{13}\text{C}$  HSQC NMR spectrum of 16.

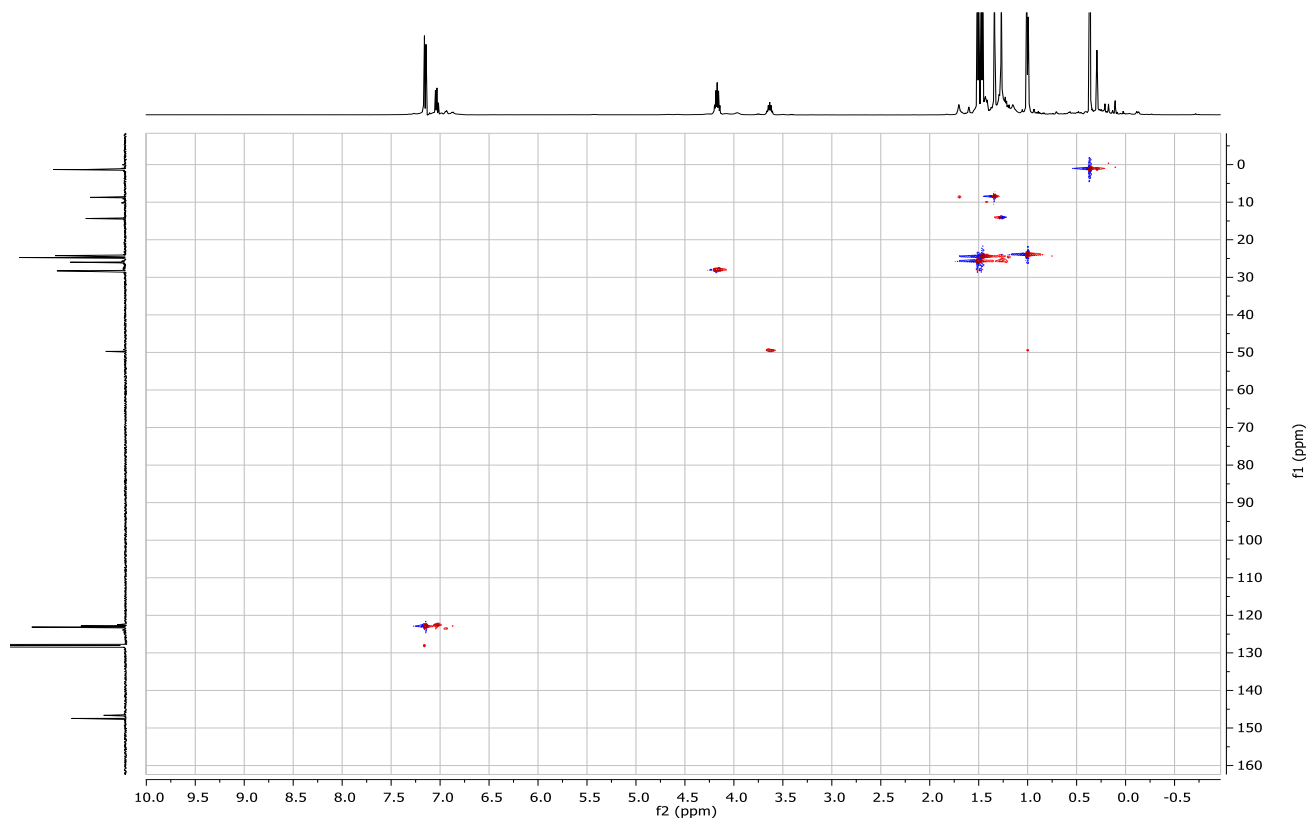

Figure S17.  $^1\text{H}$ - $^{13}\text{C}$  HMBC NMR spectrum of **16**.

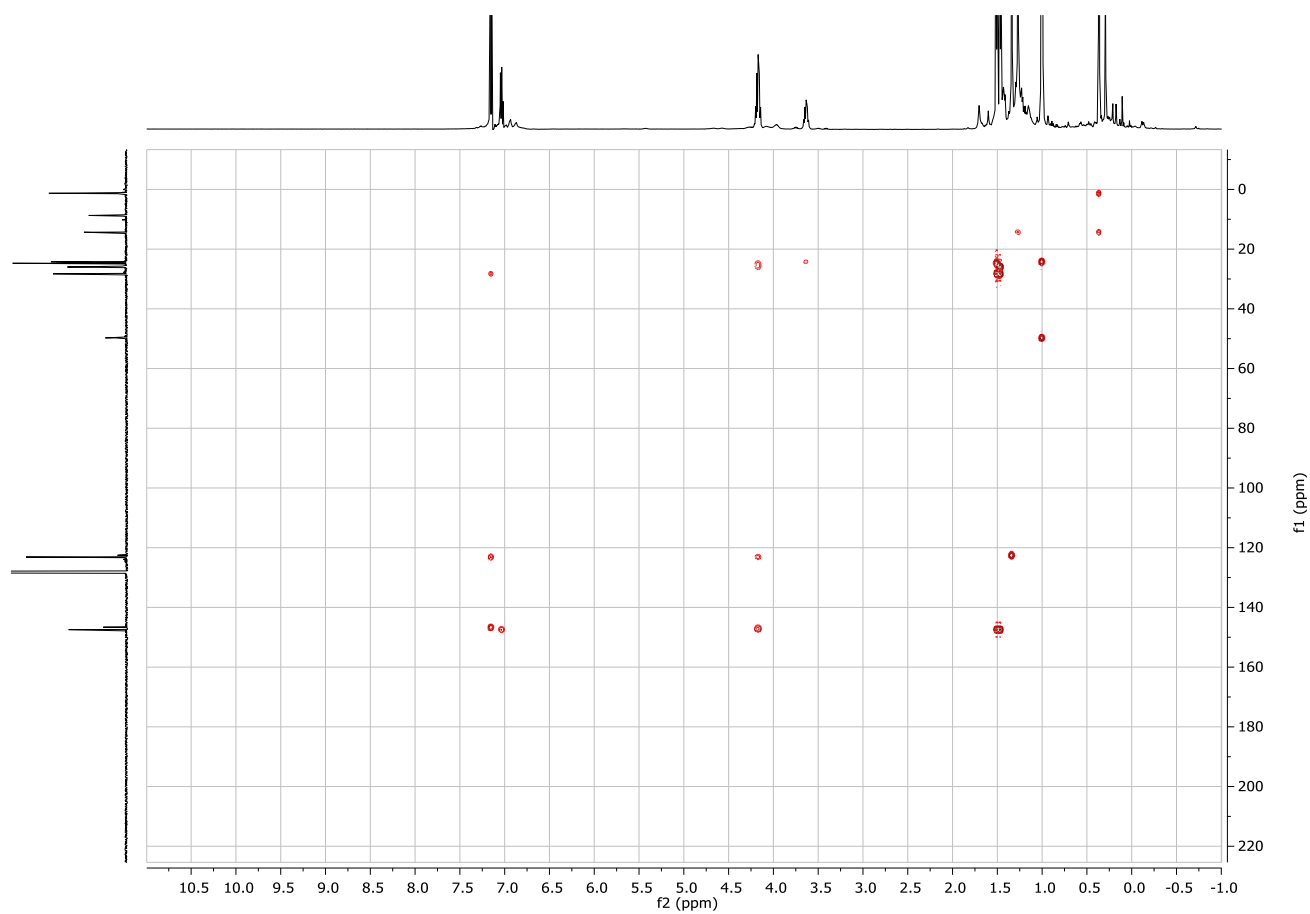

*Synthesis of {SiN<sup>Dipp</sup>}Al-Au{NHC<sup>iPr</sup>} (17)*

Hexane (30 mL) was cannula transferred into a Schlenk flask charged with *N,N'*-diisopropyl-4,5-reaction mixture was then stirred at room temperature overnight before filtering. The pale-yellow filtrate was then collected, and all volatiles were removed *in vacuo*, giving **17** as a light brown fine powder. Yield 0.617 g, 69%. Colourless crystals suitable for X-ray crystallography were obtained by slow evaporation of a methylcyclohexane solution at room temperature. No meaningful result was obtained for elemental analysis after multiple attempts. <sup>1</sup>H NMR (500 MHz, 298 K, Benzene-d<sub>6</sub>) δ 7.15 – 7.13 (m, 4H, *m*-C<sub>6</sub>H<sub>3</sub>), 7.04 – 6.98 (m, 2H, *p*-C<sub>6</sub>H<sub>3</sub>), 4.15 (sept, *J* = 6.9 Hz, 4H, CHMe<sub>2</sub> on SiN<sup>Dipp</sup>), 3.84 (sept, *J* = 6.9 Hz, 2H, CHMe<sub>2</sub> on NHC<sup>iPr</sup>), 1.57 (d, *J* = 6.9 Hz, 12H, CHMe<sub>2</sub> on SiN<sup>Dipp</sup>), 1.47 (d, *J* = 6.9 Hz, 12H, CHMe<sub>2</sub> on SiN<sup>Dipp</sup>), 1.33 (s, 6H, NCMe), 1.24 (s, 4H, SiCH<sub>2</sub>), 1.07 (d, *J* = 6.9 Hz, 12H, CHMe<sub>2</sub> on NHC<sup>iPr</sup>), 0.35 (s, 12H, SiMe<sub>2</sub>). <sup>13</sup>C{<sup>1</sup>H} NMR (126 MHz, 298 K, Benzene-d<sub>6</sub>) δ 216.1 (AuC<sub>carbene</sub>) 147.3 (*o*-C<sub>6</sub>H<sub>3</sub>), 146.3 (*i*-C<sub>6</sub>H<sub>3</sub>), 123.1 (*m*-C<sub>6</sub>H<sub>3</sub>), 123.0 (*p*-C<sub>6</sub>H<sub>3</sub>), 122.7 (NCMe), 50.1 (NCHMe<sub>2</sub> on NHC), 28.4 (CHMe<sub>2</sub> on SiN<sup>Dipp</sup>), 26.0 (CHMe<sub>2</sub> on SiN<sup>Dipp</sup>), 24.7 (CHMe<sub>2</sub> on SiN<sup>Dipp</sup>), 23.5 (NCHMe<sub>2</sub> on NHC<sup>iPr</sup>), 14.2 (SiCH<sub>2</sub>), 9.1 (NCMe), 1.1 (SiMe<sub>2</sub>).



**Figure S18.**  $^1\text{H}$  NMR spectrum of **17**. (500 MHz, 298 K, Benzene- $d_6$ )

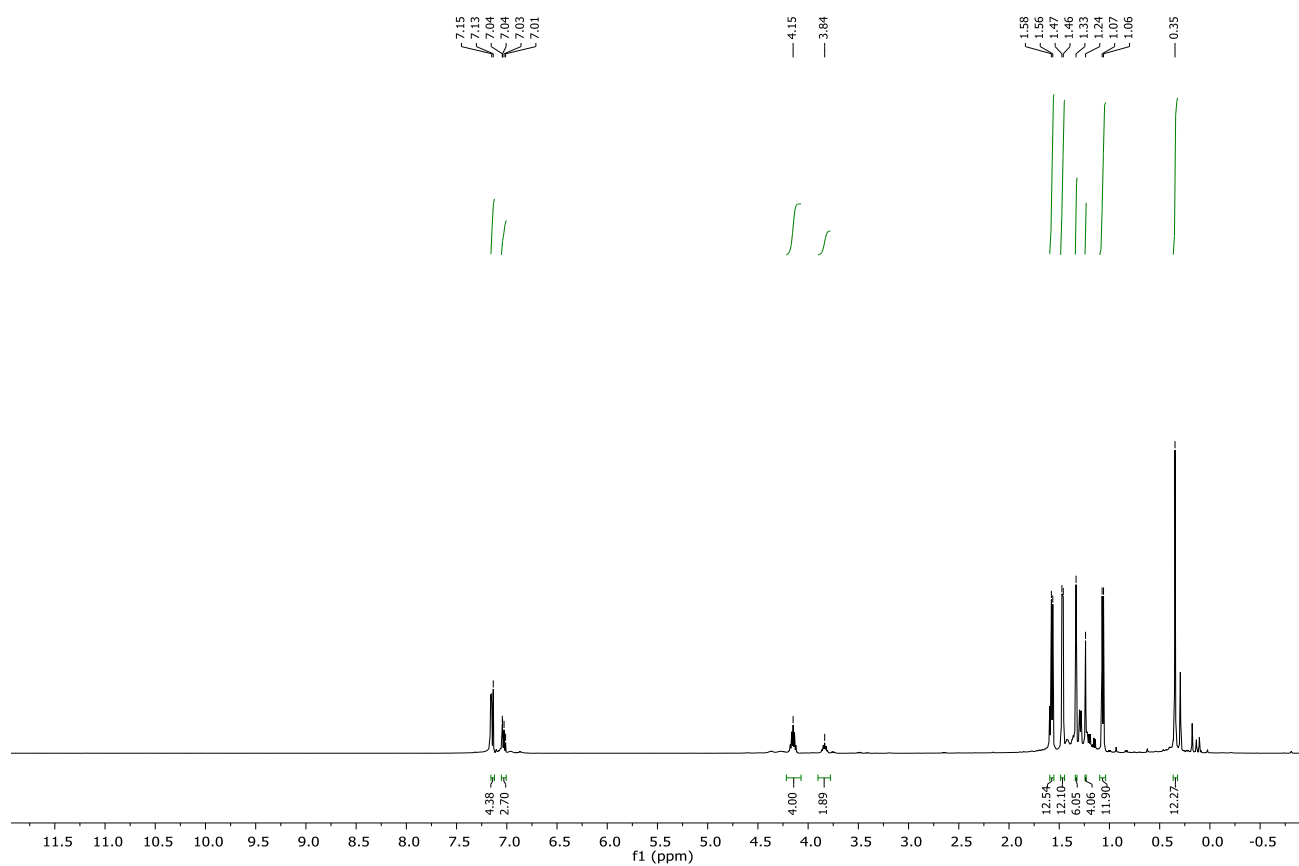

**Figure S19.**  $^{13}\text{C}\{^1\text{H}\}$  NMR spectrum of **17**. (126 MHz, 298 K, Benzene- $d_6$ )

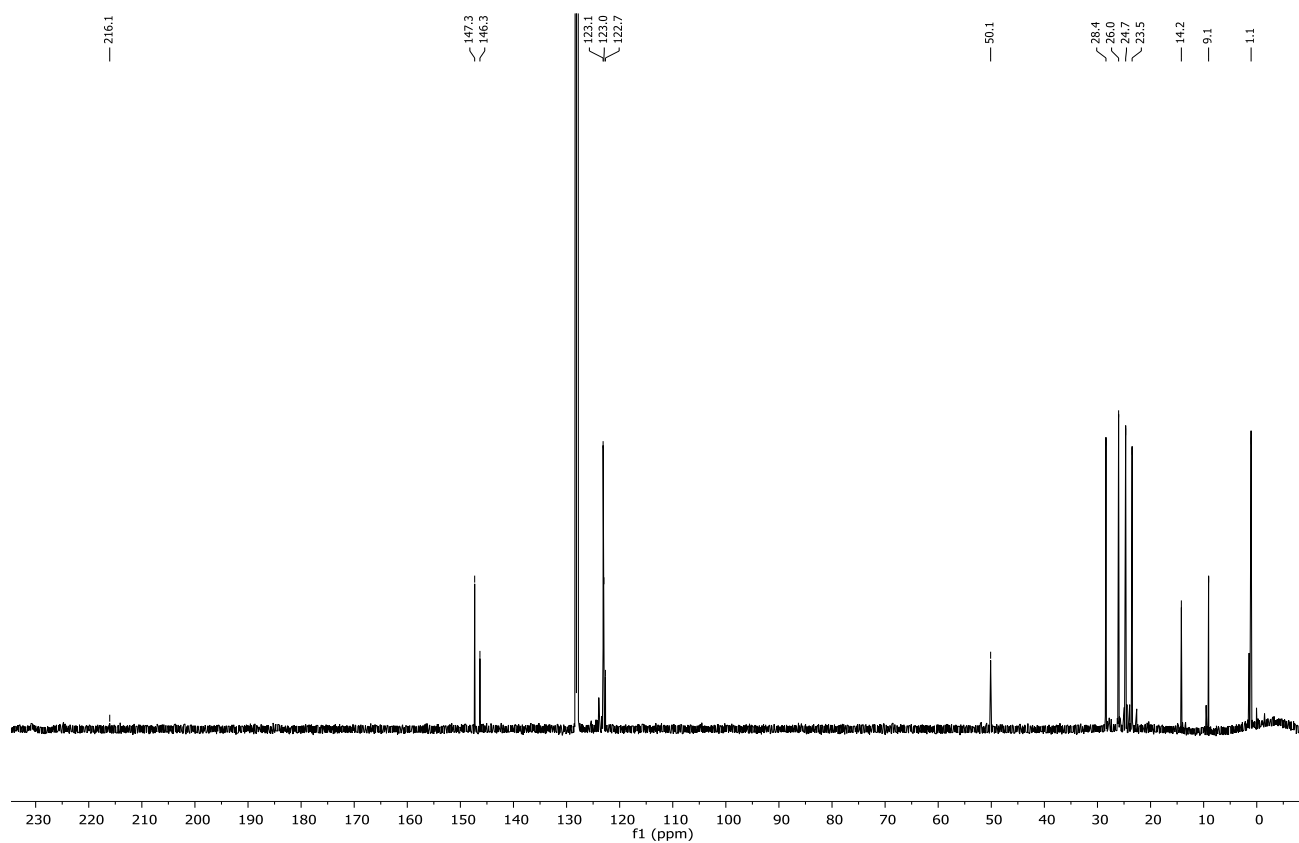

Figure S20.  $^1\text{H}$ - $^1\text{H}$  COSY NMR spectrum of 17.

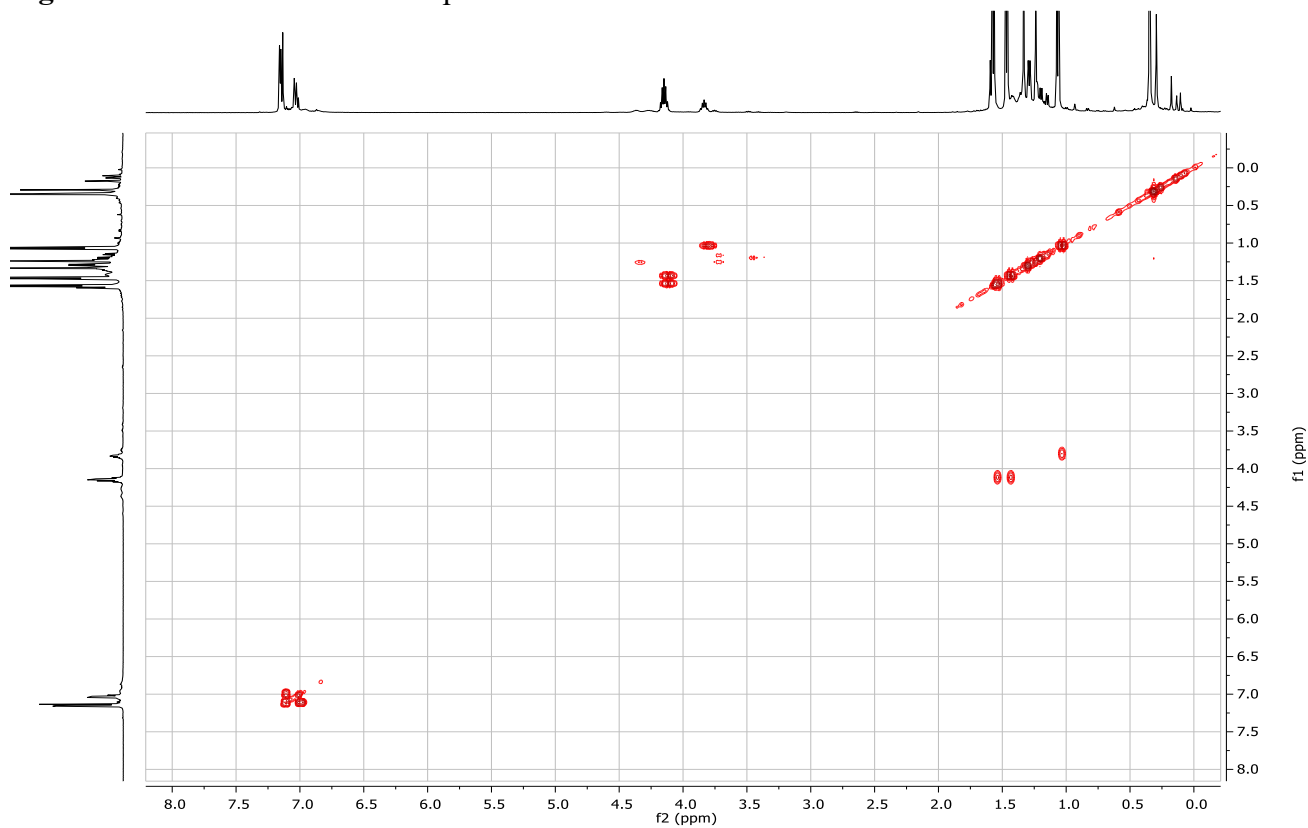

Figure S21.  $^1\text{H}$ - $^{13}\text{C}$  HSQC NMR spectrum of 17.

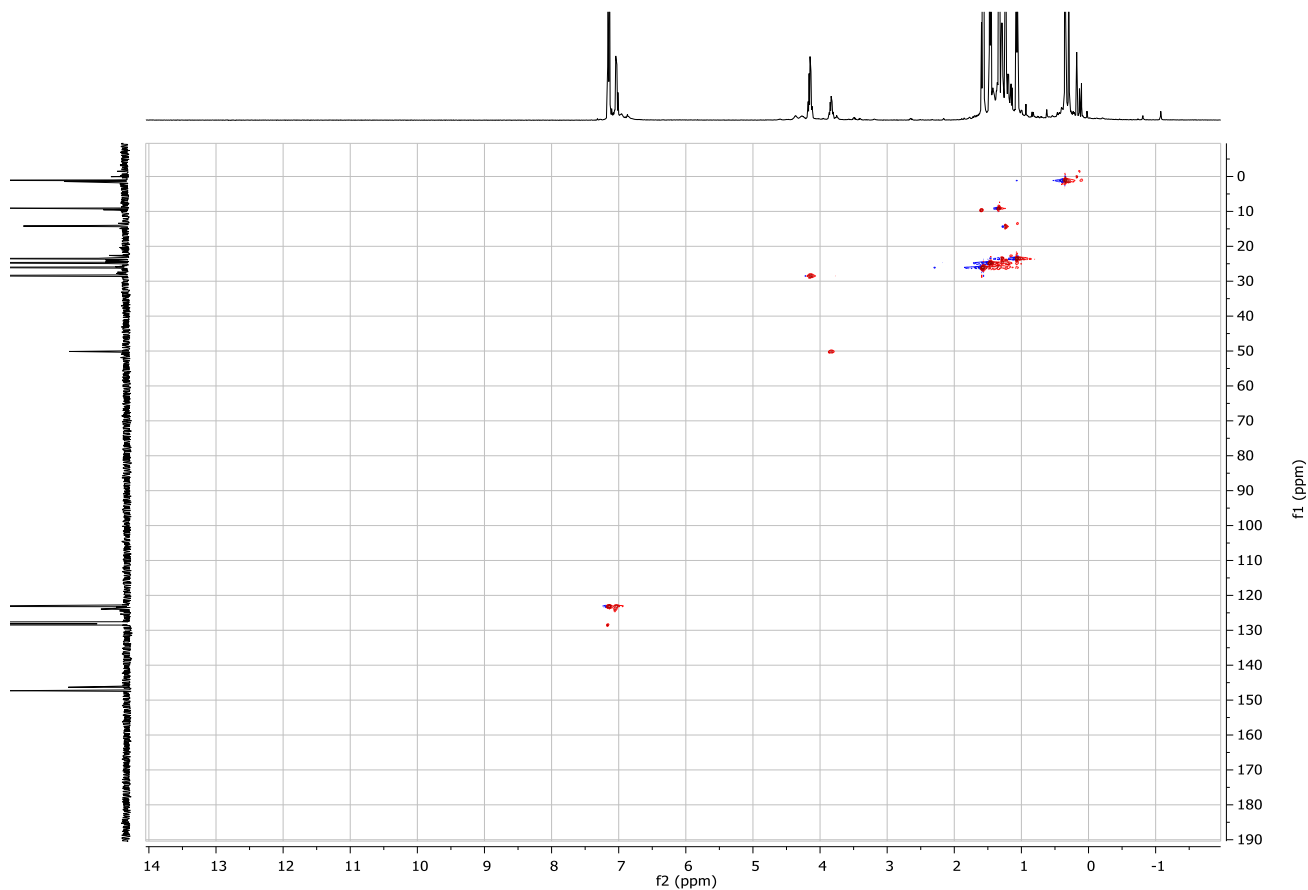

Figure S22.  $^1\text{H}$ - $^{13}\text{C}$  HMBC NMR spectrum of **17**.

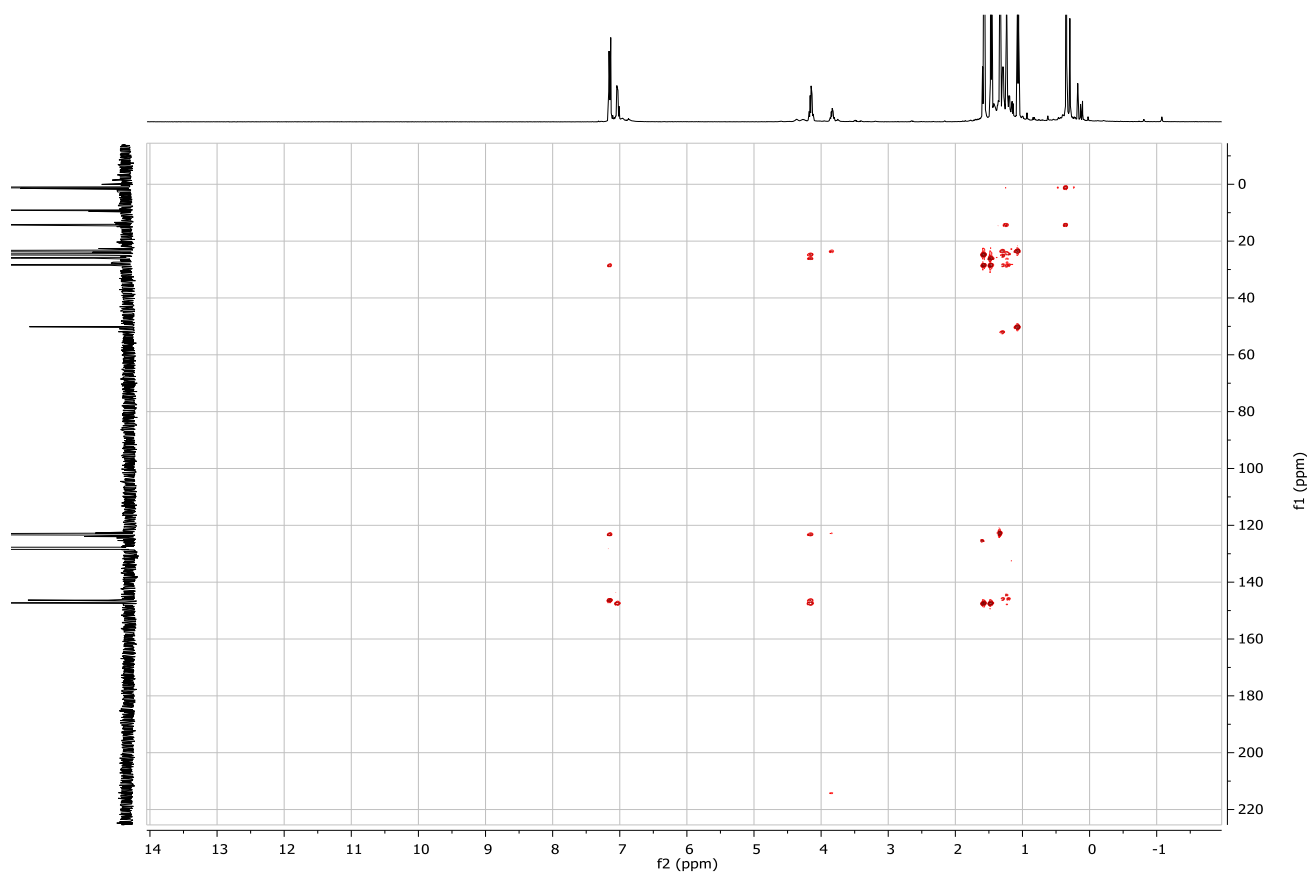

*Isolation of  $\{\text{SiN}^{\text{Dipp}}\}\text{Al-Ag}^{\text{cyCAAC}}\{\mathbf{18}\}$*

Inside a J-Young's tube,  $^{\text{cy}}\text{CAACAgCl}$  (23.5mg, 0.05mmol) was added to the  $\text{C}_6\text{D}_6$  solution of  $[\{\text{SiN}^{\text{Dipp}}\}\text{AlK}]_2$  (**3**) (28mg, 0.05mmol) to afford a pale-yellow reaction mixture. compound **18** was then identified by X-ray crystallography as a colourless crystal picked from the mix of crystalline and amorphous obtained from slow evaporation of the benzene solution of the crude reaction mixture.

*Synthesis of {SiN<sup>Diipp</sup>}Al-C(N<sup>iPr</sup>)<sub>2</sub>-Ag{NHC<sup>iPr</sup>} (19)*

Inside a J Young's tube, {SiN<sup>Diipp</sup>}Al- Ag{ NHC<sup>iPr</sup>} (**16**, 40.5mg, 0.05mmol) was dissolved in 0.4mL of C<sub>6</sub>D<sub>6</sub>, *N,N'*-diisopropylcarbodiimide (7.8μL, 0.05mmol) was then added *via* a micropipette. <sup>1</sup>H NMR suggested a slow conversion of the starting materials into a new species within 30 min. Total transformation was observed after the reaction mixture was left at room temperature for 4 hours, cleanly forming a new single species. The benzene solution was then put under vacuum to remove all volatiles and giving **19** as white solid. Colourless crystals suitable for X-ray crystallography were obtained by slow evaporation of a methylcyclohexane solution at room temperature. Yield 34 mg, 73%. No meaningful result for elemental analysis was obtained after several attempts. <sup>1</sup>H NMR (500 MHz, 298 K, Benzene-*d*<sub>6</sub>) δ 7.26-7.24 (m, 4H, *m*-C<sub>6</sub>H<sub>3</sub>), 7.16 – 7.11 (m, 2H, *p*-C<sub>6</sub>H<sub>3</sub>), 4.56 – 4.48 (m, 1H, NCHMe<sub>2</sub> on carbodiimide), 4.41 – 4.27 (m, 4H, CHMe<sub>2</sub> on SiN<sup>Diipp</sup>), 4.06 (sept, *J* = 6.9 Hz, 2H, NCHMe<sub>2</sub> on NHC<sup>iPr</sup>), 3.51 – 3.42 (m, 1H, NCHMe<sub>2</sub> on carbodiimide), 1.63 (d, *J* = 6.8 Hz, 6H, CHMe<sub>2</sub> on SiN<sup>Diipp</sup>), 1.56 (m, 6H, CHMe<sub>2</sub> on SiN<sup>Diipp</sup>), 1.53-1.48 (m, 12H, CHMe<sub>2</sub> on SiN<sup>Diipp</sup>), 1.40-1.35 (br, 4H, SiCH<sub>2</sub>), 1.34 (s, 6H, NCM<sub>e</sub>), 1.09 (d, *J* = 6.9 Hz, 12H, NCHMe<sub>2</sub> on NHC<sup>iPr</sup>), 1.01 – 0.91 (m, 6H, NCHMe<sub>2</sub> on carbodiimide) 0.91-0.77 (m, 6H, NCHMe<sub>2</sub> on carbodiimide), 0.52 – 0.31 (br, 12H, SiMe<sub>2</sub>). <sup>13</sup>C {<sup>1</sup>H} NMR (126 MHz, 298 K, Benzene-*d*<sub>6</sub>) δ 200.0 (CN<sub>2</sub> on carbodiimide) 148.6 (*i*-C<sub>6</sub>H<sub>3</sub>), 147.0 (*o*-C<sub>6</sub>H<sub>3</sub>), 146.5 (*o*-C<sub>6</sub>H<sub>3</sub>), 123.9 (*m*-C<sub>6</sub>H<sub>3</sub>), 123.6 (*p*-C<sub>6</sub>H<sub>3</sub>), 122.6 (NCMe), 57.8 (NCHMe<sub>2</sub> on carbodiimide), 52.0 (NCHMe<sub>2</sub> on NHC<sup>iPr</sup>), 42.5 (NCHMe<sub>2</sub> on carbodiimide), 28.2 (NCHMe<sub>2</sub> on carbodiimide), 28.1 (CHMe<sub>2</sub> on SiN<sup>Diipp</sup>), 27.6 (CHMe<sub>2</sub> on SiN<sup>Diipp</sup>), 26.5 (CHMe<sub>2</sub> on SiN<sup>Diipp</sup>), 26.4 (CHMe<sub>2</sub> on SiN<sup>Diipp</sup>), 26.1 (CHMe<sub>2</sub> on SiN<sup>Diipp</sup>), 25.9 (NCHMe<sub>2</sub> on carbodiimide), 23.2 (NCHMe<sub>2</sub> on NHC<sup>iPr</sup>), 15.2 (SiCH<sub>2</sub>), 9.0 (NCMe), 2.0 (SiMe<sub>2</sub>); <sup>13</sup>C resonance correlated to Ag-C<sub>carbene</sub> was not observed.

Figure S23.  $^1\text{H}$  NMR spectrum of **19**. (500 MHz, 298 K, Benzene- $d_6$ )

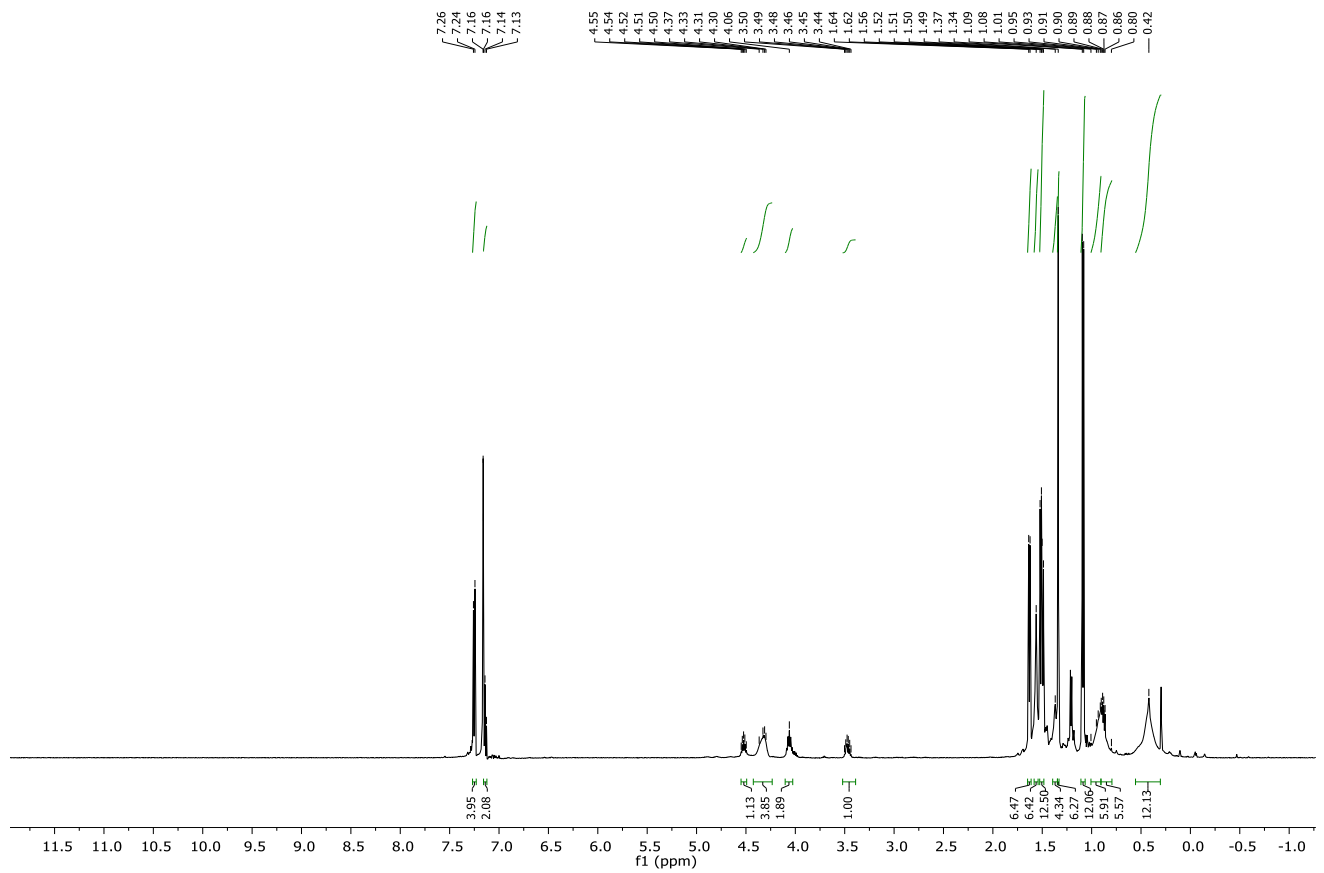

Figure S24.  $^{13}\text{C}$  NMR spectrum of **19**. (126 MHz, 298 K, Benzene- $d_6$ )

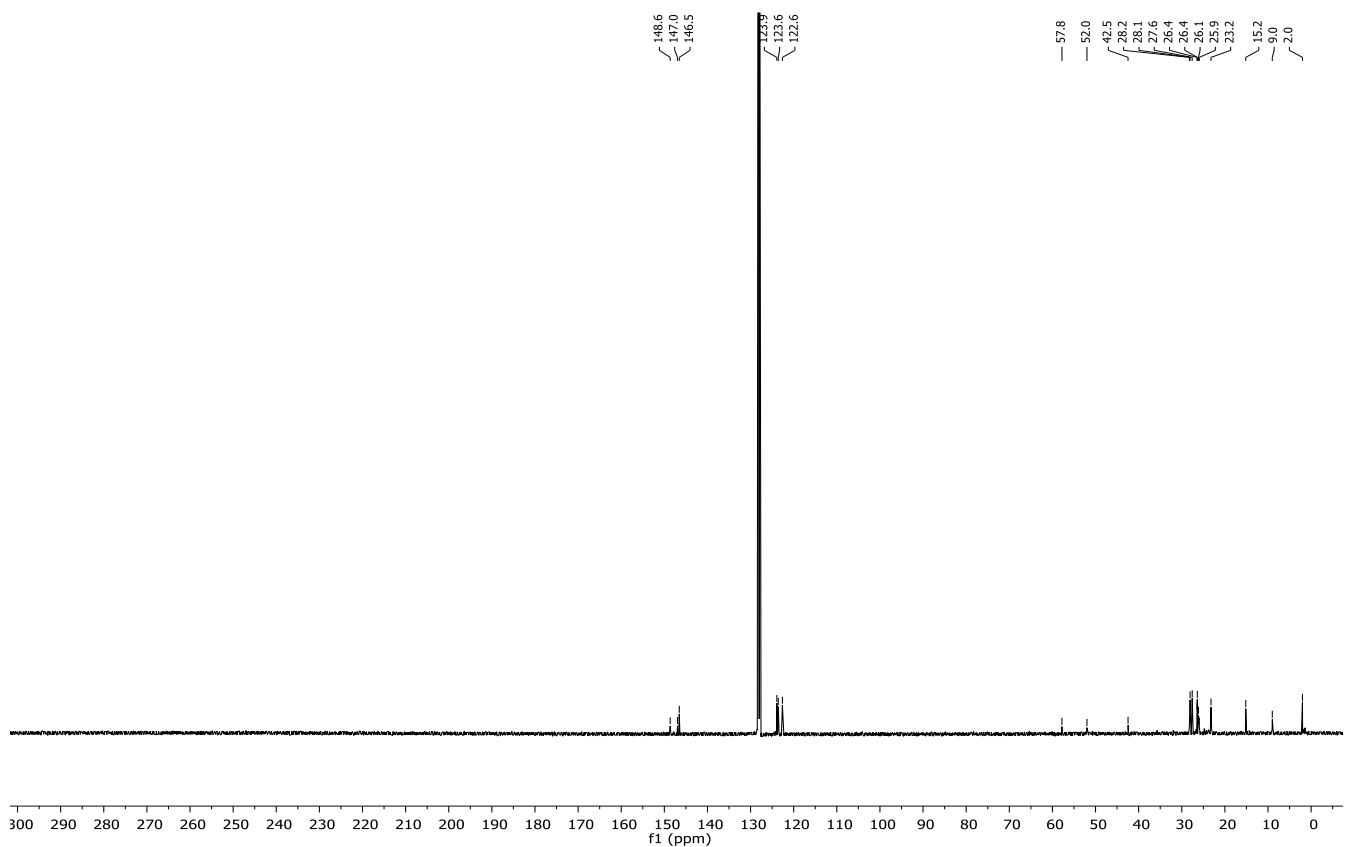

**Figure S25.**  $^1\text{H}$ - $^1\text{H}$  COSY NMR spectrum of **19**.

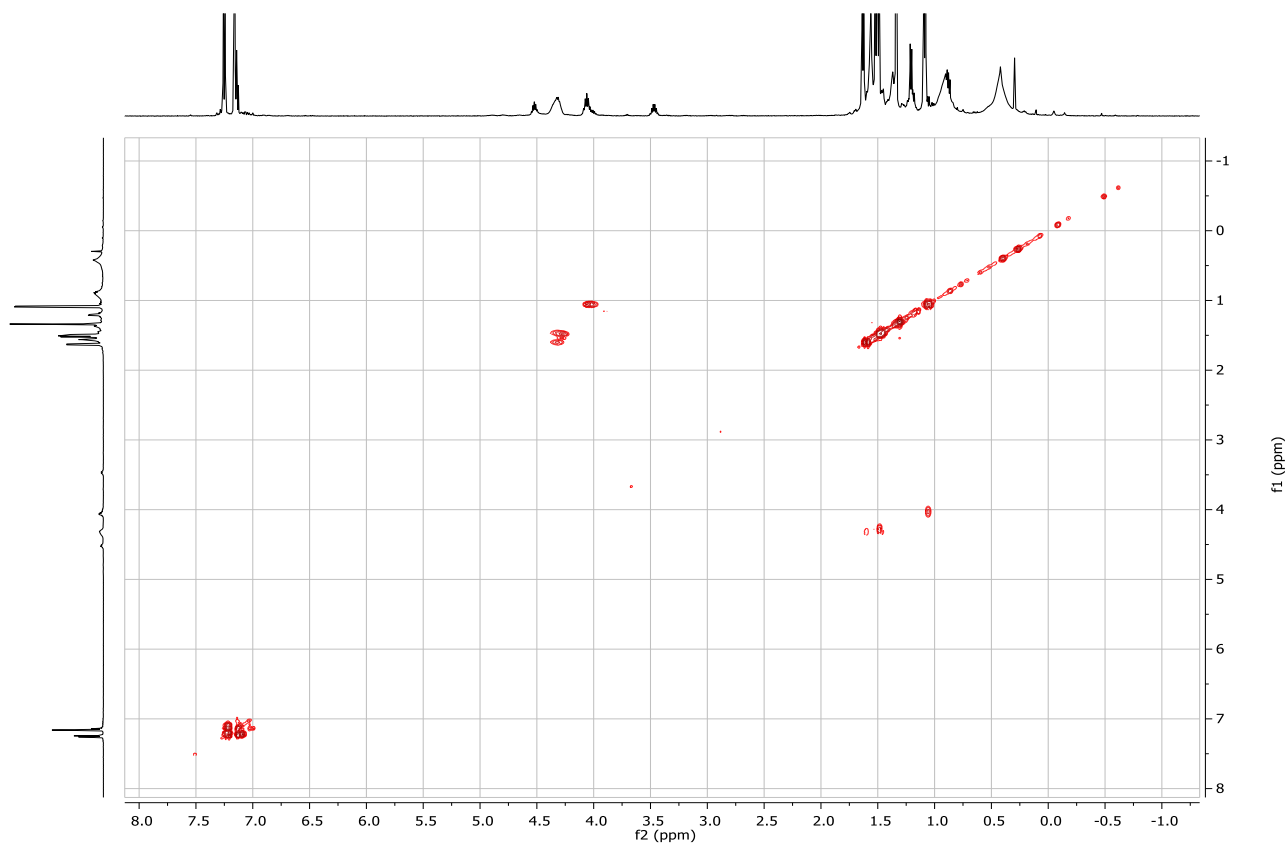

**Figure S26.**  $^1\text{H}$ - $^{13}\text{C}$  HSQC NMR spectrum of **19**.

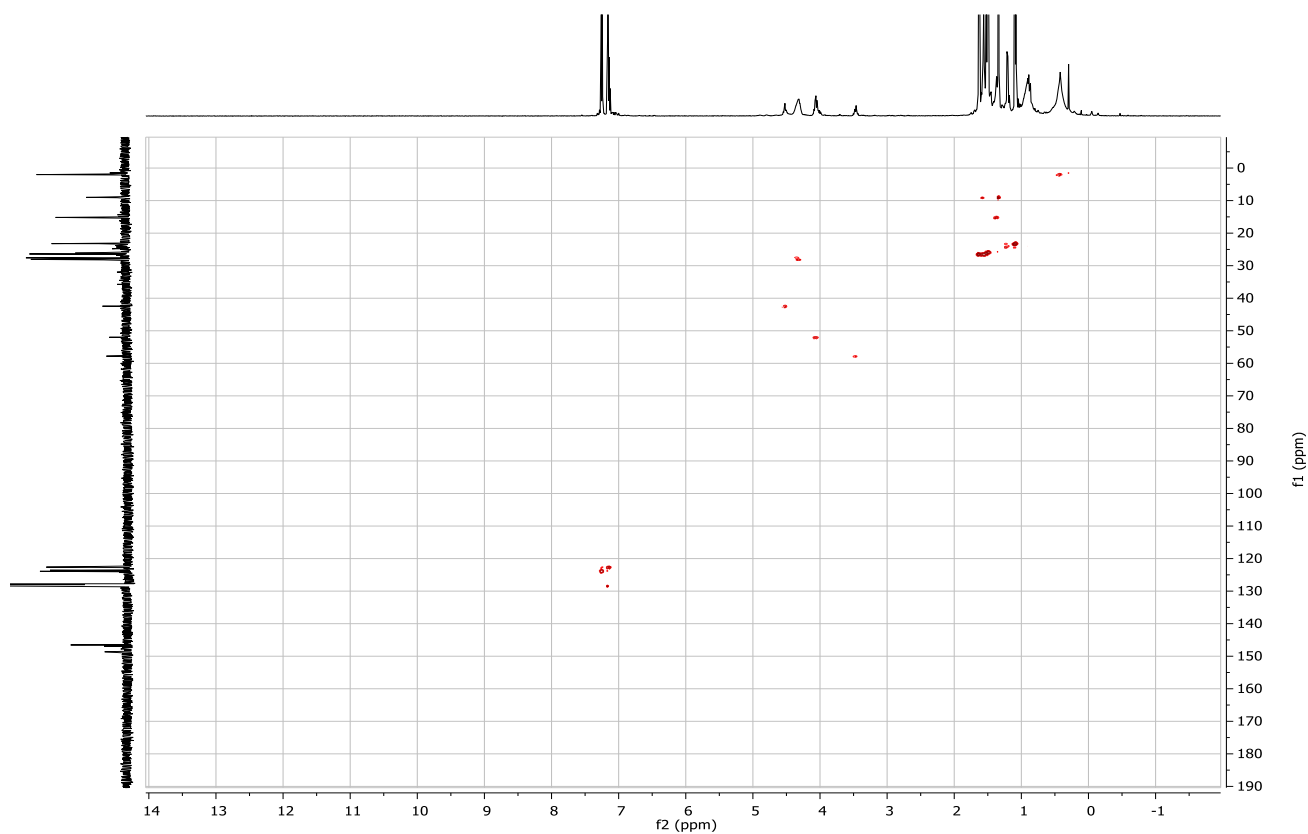

Figure S27.  $^1\text{H}$ - $^{13}\text{C}$  HMBC NMR spectrum of **19**.

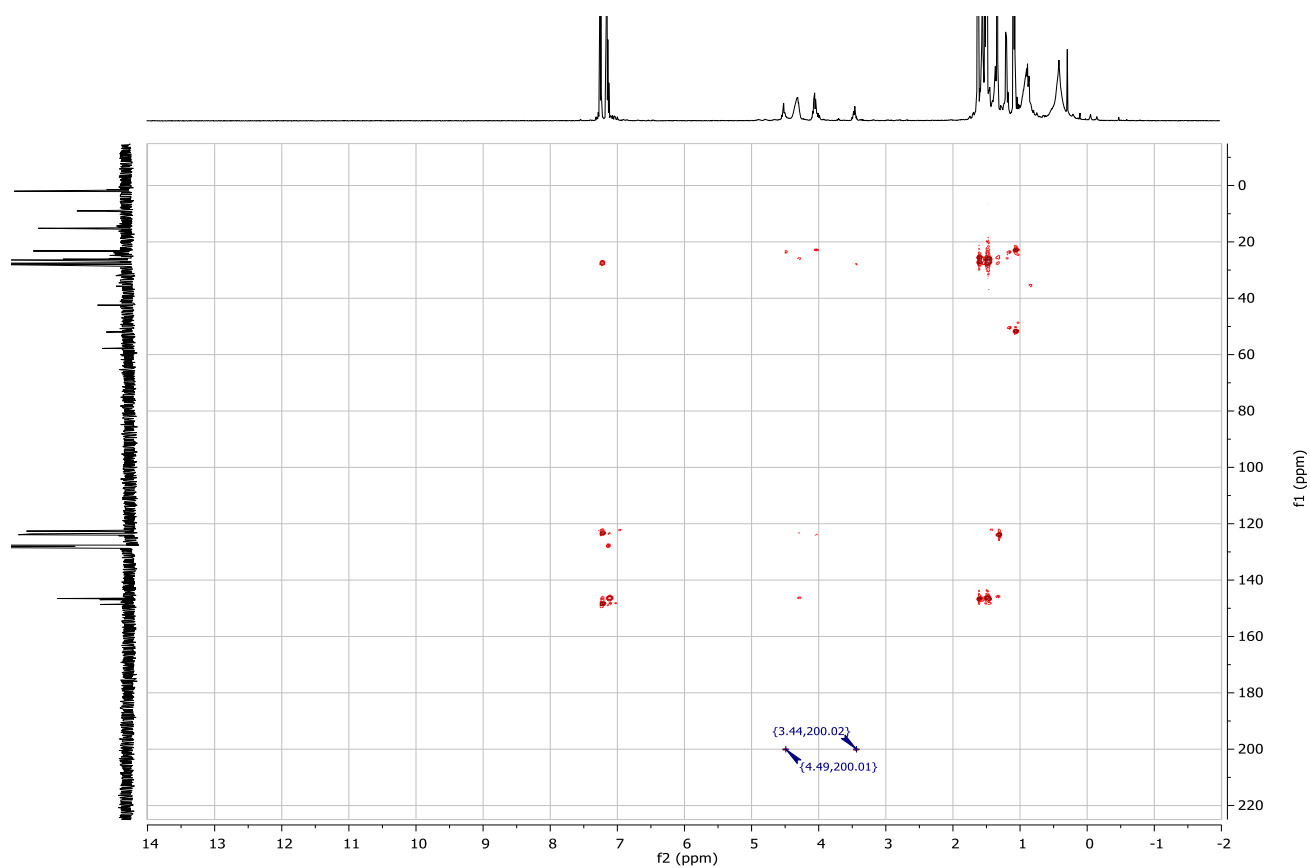



*Synthesis of  $\{\text{SiN}^{\text{Dipp}}\}\text{Al}-(\text{N}^i\text{Pr})_2\text{C}-\text{Au}\{\text{NHC}^{i\text{Pr}}\}$  (**20**)*

Inside a J Young's tube,  $\{\text{SiN}^{\text{Dipp}}\}\text{Al}-\text{Au}\{\text{NHC}^{i\text{Pr}}\}$  (**17**, 45.0mg, 0.05mmol) was dissolved in 0.4mL of  $\text{C}_6\text{D}_6$ , *N,N'*-diisopropylcarbodiimide (7.8 $\mu\text{L}$ , 0.05mmol) was then added *via* a micropipette. Total transformation was observed after the reaction mixture was left at room temperature for an hour, cleanly forming a new single species. The benzene solution was then put under vacuum to remove all volatiles and giving **20** as off white solid. Colourless crystals suitable for X-ray crystallography were obtained by slow evaporation of a methylcyclohexane solution at room temperature. Yield 38 mg, 74 %. Anal Calc'd for  $\text{C}_{48}\text{H}_{84}\text{AlAuN}_6\text{Si}_2$  (**20**, 1025.36) C, 56.23; H, 8.26; N, 8.20 %. Found: C, 56.05; H, 8.00; N, 8.25 %.  $^1\text{H}$  NMR (500 MHz, 298 K, Benzene- $d_6$ )  $\delta$  7.31-7.24 (m, 4H, *m*- $\text{C}_6\text{H}_3$ ), 7.18-7.14 (m, 2H, *p*- $\text{C}_6\text{H}_3$ , overlapping with  $\text{C}_6\text{D}_6$ ), 4.61- 4.34 (m, 4H,  $\text{CHMe}_2$  on  $\text{SiN}^{\text{Dipp}}$ ), 4.34- 4.22 (m, 2H,  $\text{CHMe}_2$  on carbodiimide) 4.04 (sept,  $J = 6.8$  Hz, 2H,  $\text{CHMe}_2$  on  $\text{NHC}^{i\text{Pr}}$ ), 1.67 – 1.60 (m, 12H,  $\text{CHMe}_2$  on  $\text{SiN}^{\text{Dipp}}$ ), 1.60-1.58 (m, 4H,  $\text{SiCH}_2$ ) 1.54-1.45 (m, 12H,  $\text{CHMe}_2$  on  $\text{SiN}^{\text{Dipp}}$ ), 1.33 (s, 6H,  $\text{NCMe}$ ), 1.22 (d,  $J = 6.8$  Hz, 12H,  $\text{CHMe}_2$  on  $\text{NHC}^{i\text{Pr}}$ ), 0.87 ( $d_{\text{app}}$ , 12H,  $\text{CHMe}_2$  on carbodiimide) 0.85-0.73 (br, 6H,  $\text{SiMe}_2$ ), 0.28 - -0.24 (br, 6H,  $\text{SiMe}_2$ ).  $^{13}\text{C}\{^1\text{H}\}$  NMR (126 MHz, 298 K, Benzene- $d_6$ )  $\delta$  220.5 (AuC on  $\text{NHC}^{i\text{Pr}}$ ), 157.9, 149.5 (*i*- and *o*-  $\text{C}_6\text{H}_3$ ), 124.2 ( $\text{NCMe}$ ), 123.8 (*m*- $\text{C}_6\text{H}_3$ ), 122.7 (*p*- $\text{C}_6\text{H}_3$ ), 51.6 ( $\text{CHMe}_2$  on carbodiimide), 51.2 ( $\text{CHMe}_2$  on  $\text{NHC}^{i\text{Pr}}$ ), 35.7 ( $\text{CHMe}_2$  on  $\text{SiN}^{\text{Dipp}}$ ), 26.8 ( $\text{CHMe}_2$  on  $\text{SiN}^{\text{Dipp}}$ ), 26.7 ( $\text{CHMe}_2$  on  $\text{SiN}^{\text{Dipp}}$ ), 23.1 ( $\text{CHMe}_2$  on carbodiimide), 22.9 ( $\text{CHMe}_2$  on  $\text{NHC}^{i\text{Pr}}$ ), 15.1 ( $\text{SiCH}_2$ ), 9.1 ( $\text{NCMe}$ ), 1.4 ( $\text{SiMe}_2$ ).  $^{13}\text{C}$  resonance correlated to the AuC on carbodiimide not observed.

Figure S28.  $^1\text{H}$  NMR spectrum of **20**. (500 MHz, 298 K, Benzene- $d_6$ )

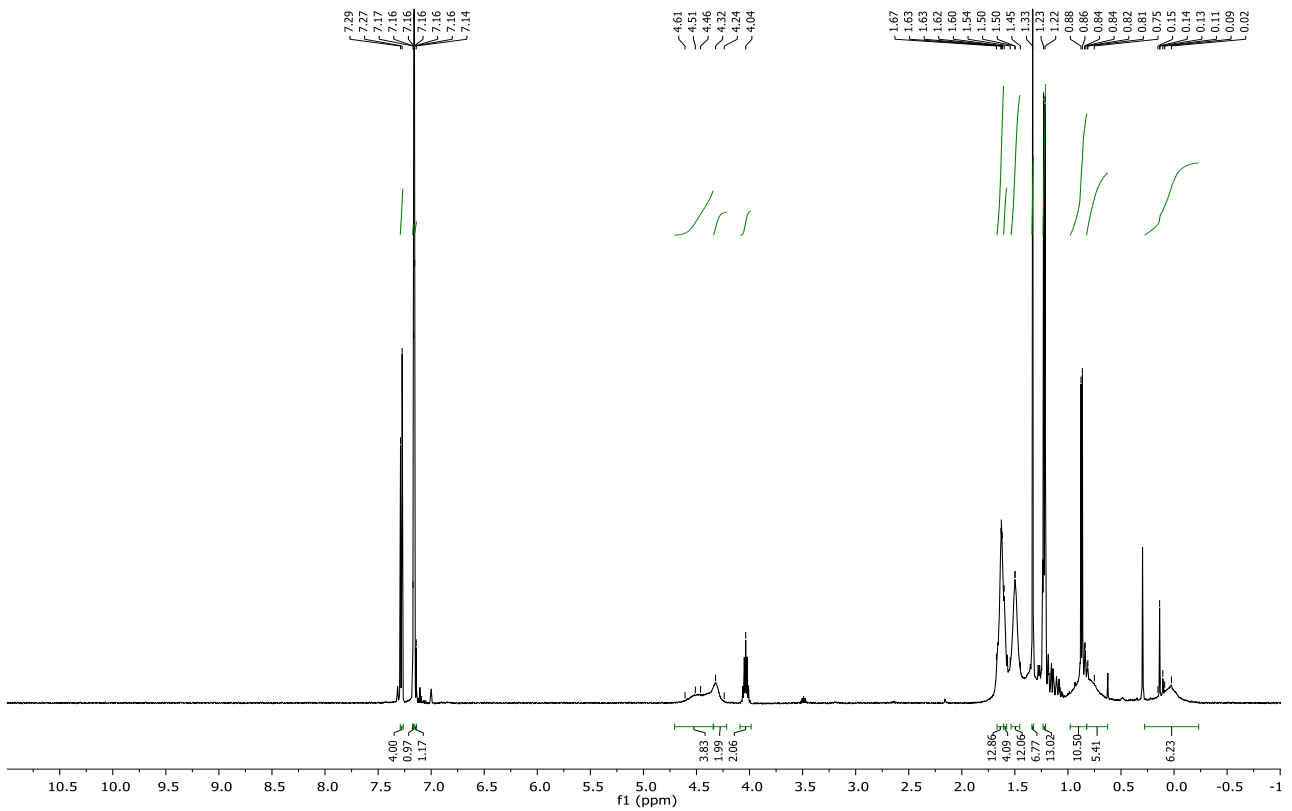

Figure S29.  $^{13}\text{C}\{^1\text{H}\}$  NMR spectrum of **20**. (126 MHz, 298 K, Benzene- $d_6$ )

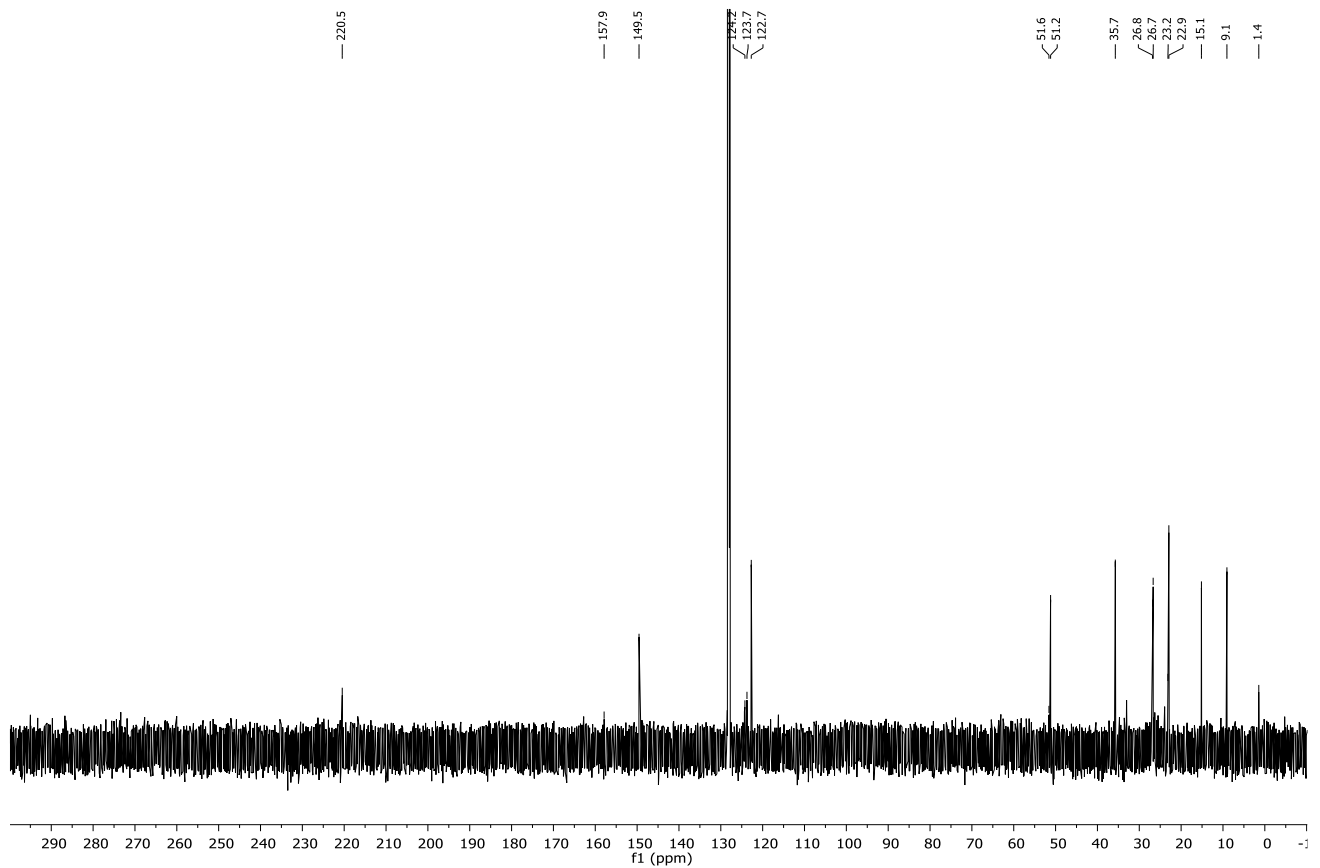

Figure S30.  $^1\text{H}$ - $^1\text{H}$  COSY NMR spectrum of **20**.

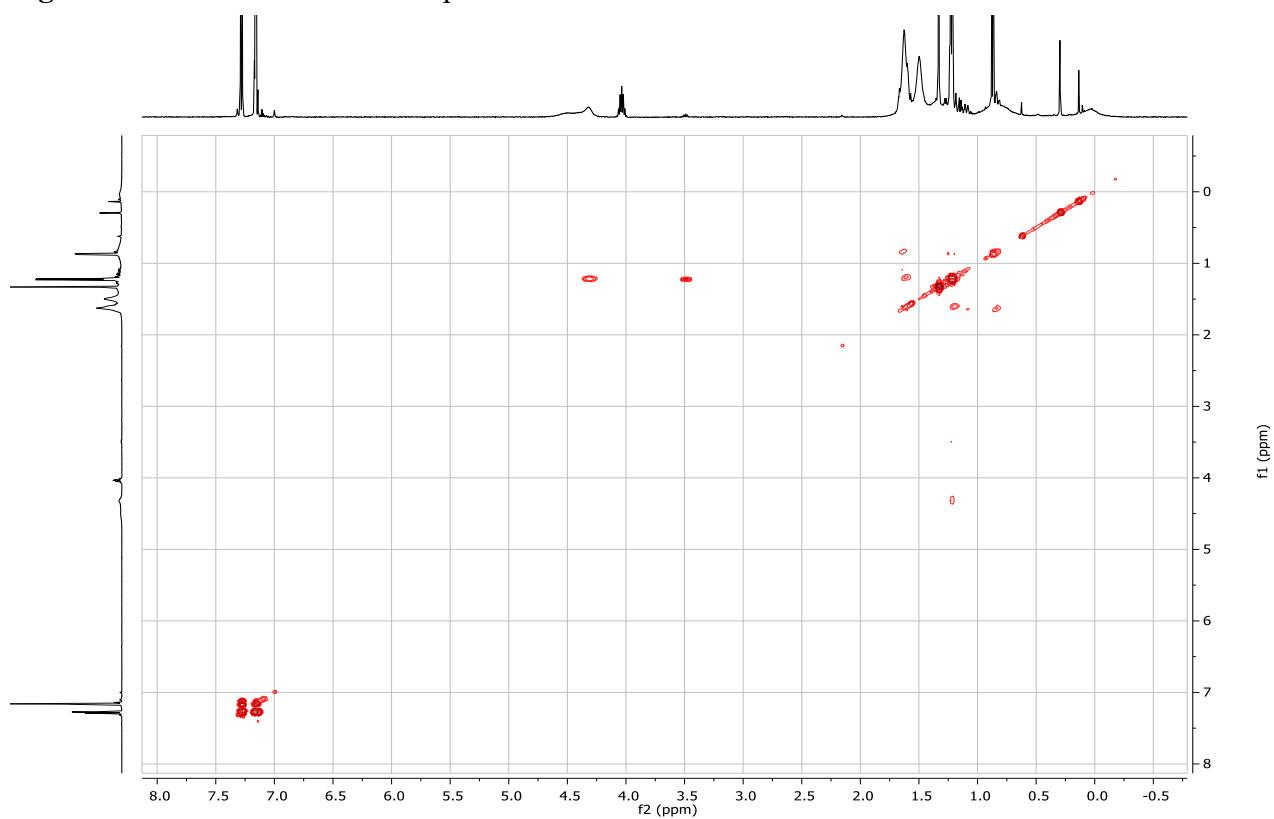

Figure S31.  $^1\text{H}$ - $^{13}\text{C}$  HSQC NMR spectrum of **20**.

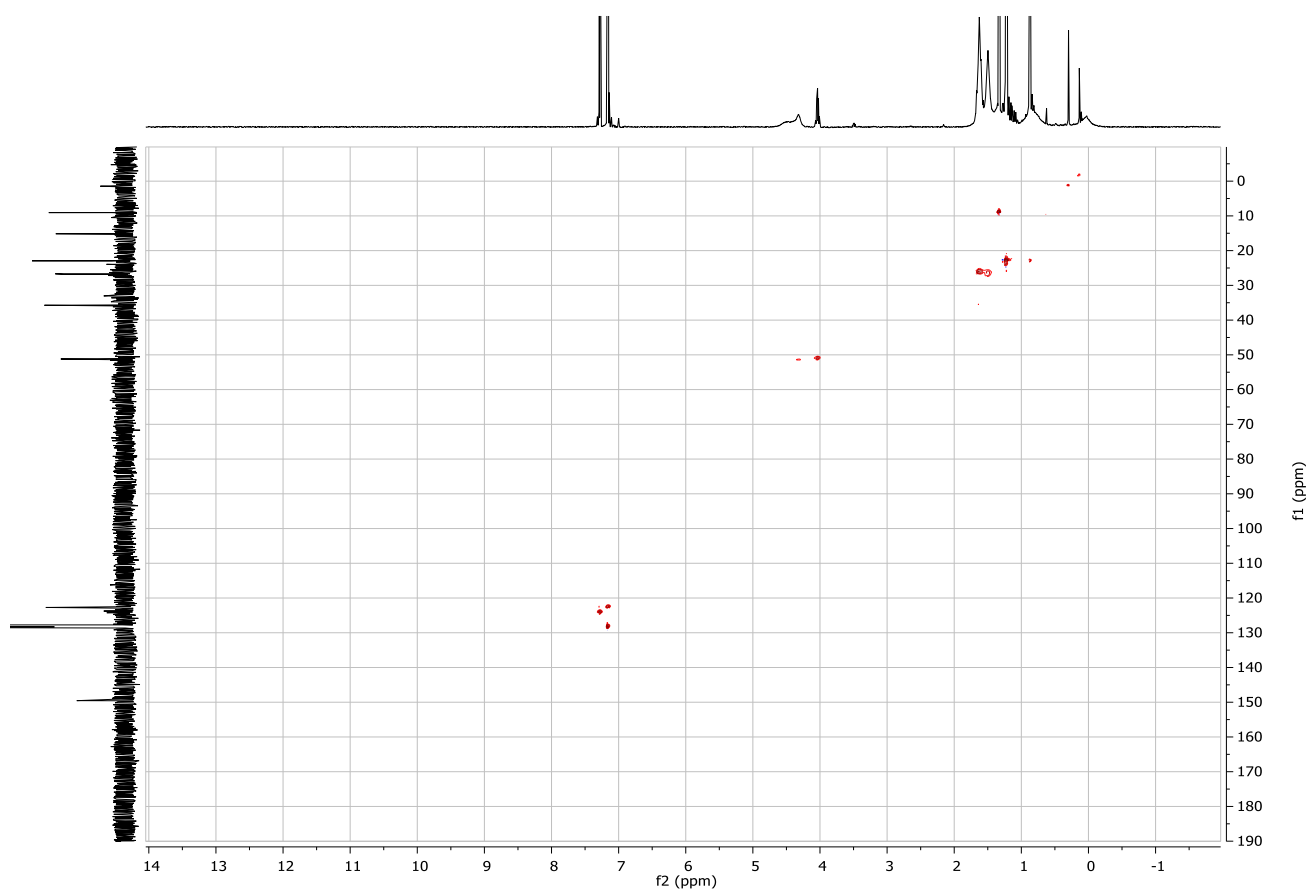

Figure S32.  $^1\text{H}$ - $^{13}\text{C}$  HMBC NMR spectrum of **20**.

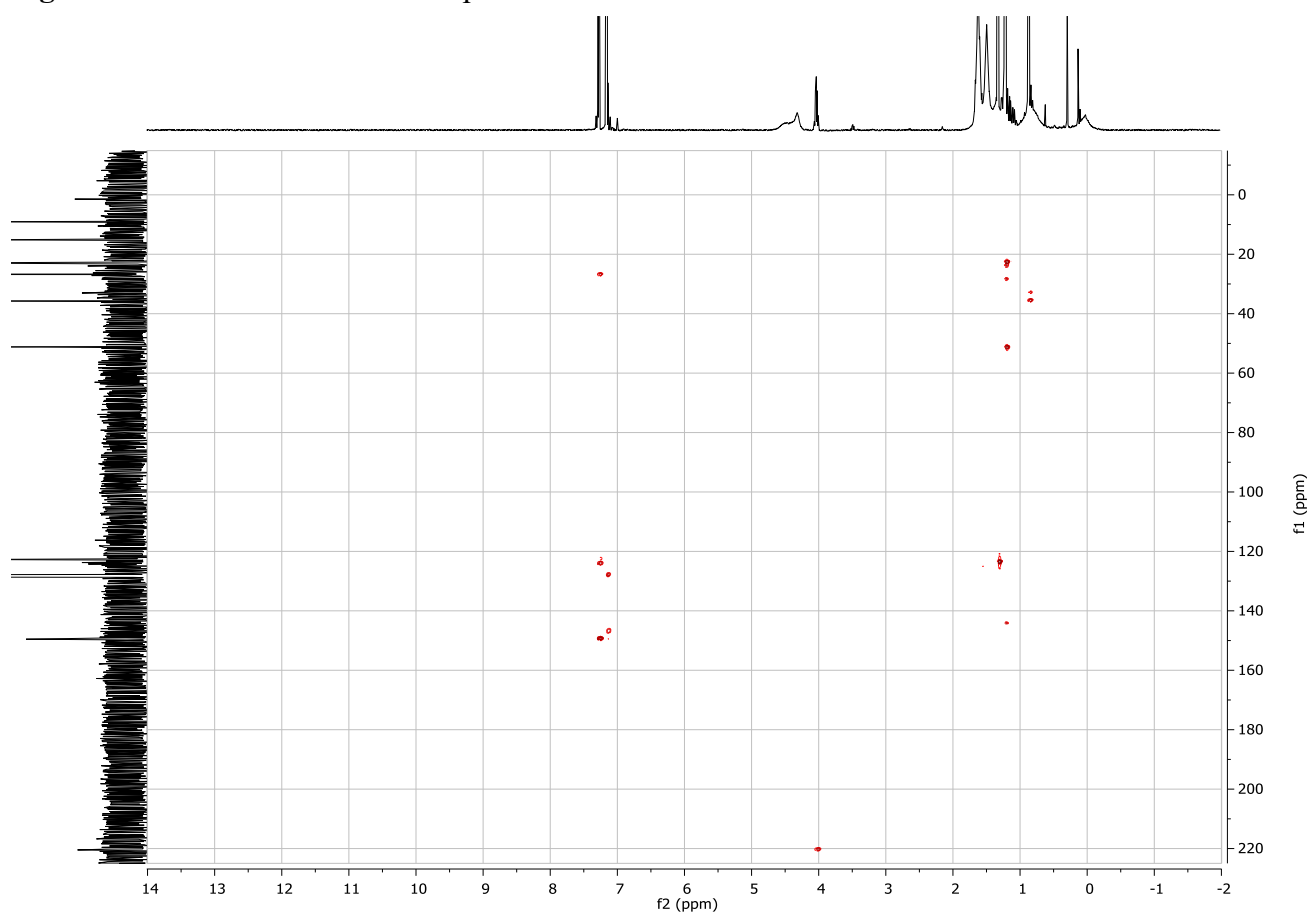

*Synthesis of {SiN<sup>Dipp</sup>}Al-O<sub>2</sub>C-Ag{NHC<sup>iPr</sup>} (21)*

{SiN<sup>Dipp</sup>}Al-Ag{NHC<sup>iPr</sup>} (**16**, 25mg, 0.031mmol) was dissolved in 0.4mL of C<sub>6</sub>D<sub>6</sub> inside a J Young's tube. The solution was then degassed by three cycles of freeze-pump-thaw before the tube was charged with 2 atm of <sup>13</sup>CO<sub>2</sub>. Full Conversion of the starting material was determined by <sup>1</sup>H and <sup>13</sup>C NMR spectra within 30 minutes of the addition of the CO<sub>2</sub> to the solution. The benzene solution was then put under reduced pressure to remove all volatiles and giving **21** as an off-white waxy solid. Yield 19 mg, 71%. No meaningful result was obtained for elemental analysis after multiple attempts. <sup>1</sup>H NMR (500 MHz, 298 K, Benzene-*d*<sub>6</sub>) δ 7.18 (d, *J* = 7.6 Hz, 4H, *m*-C<sub>6</sub>H<sub>3</sub>), 7.07 (t, *J* = 7.6 Hz, 2H, *p*-C<sub>6</sub>H<sub>3</sub>), 4.22 (sept, *J* = 6.9 Hz, 4H, CHMe<sub>2</sub> on SiN<sup>Dipp</sup>), 3.63 (sept, *J* = 6.8 Hz, 2H, CHMe<sub>2</sub> on NHC<sup>iPr</sup>), 1.60 (d, *J* = 6.9 Hz, 12H, CHMe<sub>2</sub> on SiN<sup>Dipp</sup>), 1.47 (d, *J* = 6.9 Hz, 12H, CHMe<sub>2</sub> on SiN<sup>Dipp</sup>), 1.30 (s, 4H, SiCH<sub>2</sub>), 1.24 (s, 6H, NCM<sub>e</sub>), 0.99 (d, *J* = 6.8 Hz, 12H, CHMe<sub>2</sub> on NHC<sup>iPr</sup>), 0.39 (s, br, 12H, SiMe<sub>2</sub>). <sup>13</sup>C{<sup>1</sup>H} NMR (126 MHz, 298 K, Benzene-*d*<sub>6</sub>) δ 240.4 (2xd, *J*<sub>109Ag-C</sub> = 252.6, *J*<sub>107Ag-C</sub> = 218.9 Hz, AgCO<sub>2</sub>), 154.5 (*i*-C<sub>6</sub>H<sub>3</sub>), 146.8 (*o*-C<sub>6</sub>H<sub>3</sub>), 123.8 (*m*-C<sub>6</sub>H<sub>3</sub>), 123.6 (*p*-C<sub>6</sub>H<sub>3</sub>), 123.1 (NCMe), 50.3 (NCHMe<sub>2</sub> on NHC<sup>iPr</sup>), 27.9 (CHMe<sub>2</sub> on SiN<sup>Dipp</sup>), 25.5 (CHMe<sub>2</sub> on SiN<sup>Dipp</sup>), 25.5 (CHMe<sub>2</sub> on SiN<sup>Dipp</sup>), 23.9 (NCHMe<sub>2</sub> on NHC<sup>iPr</sup>), 14.5 (SiCH<sub>2</sub>), 8.7 (NCMe), 0.6 (SiMe<sub>2</sub>). <sup>13</sup>C resonance correlated to AgC<sub>carbene</sub> was not observed.

Figure S33.  $^1\text{H}$  NMR spectrum of **21**. (500 MHz, 298 K, Benzene- $d_6$ )

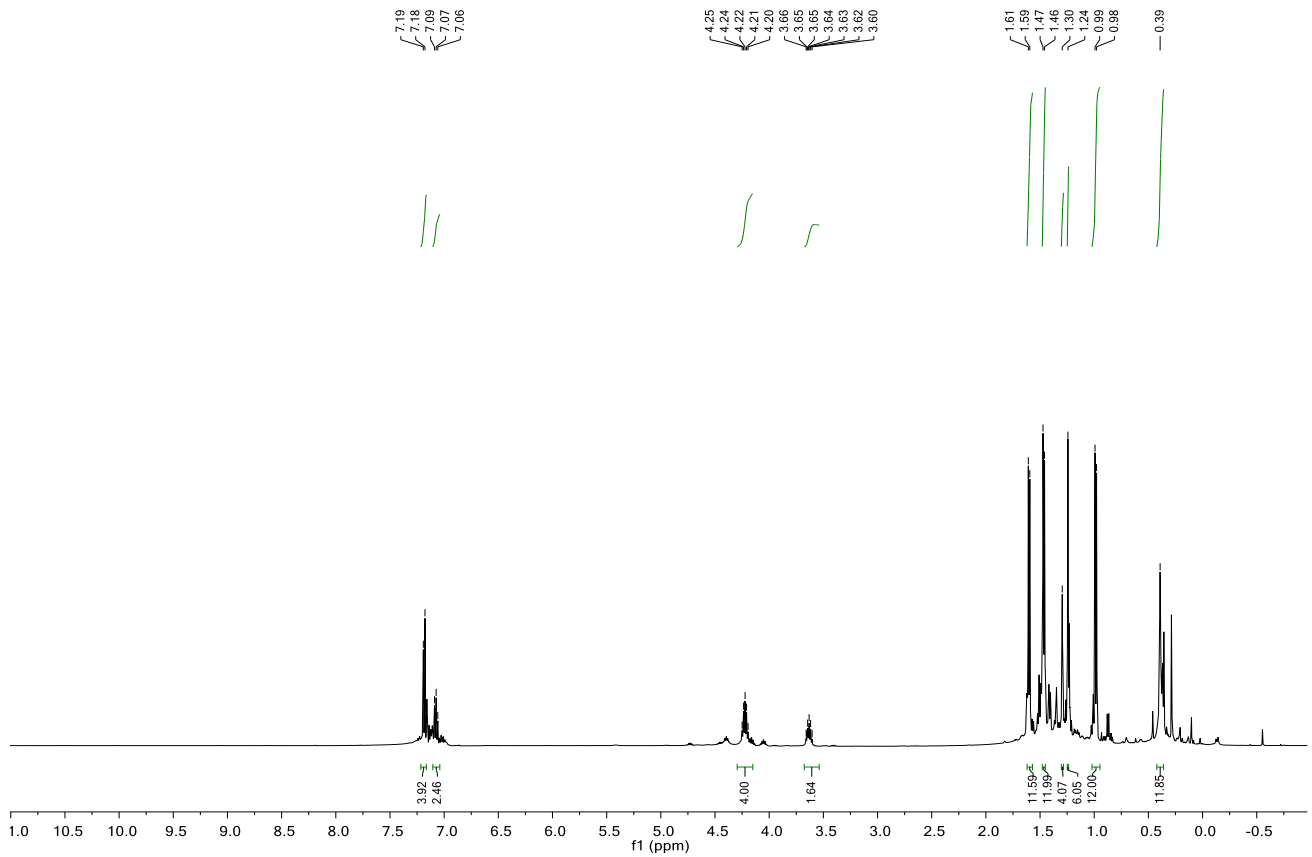

Figure S34.  $^{13}\text{C}\{^1\text{H}\}$  NMR spectrum of **21**. (126 MHz, 298 K, Benzene- $d_6$ )

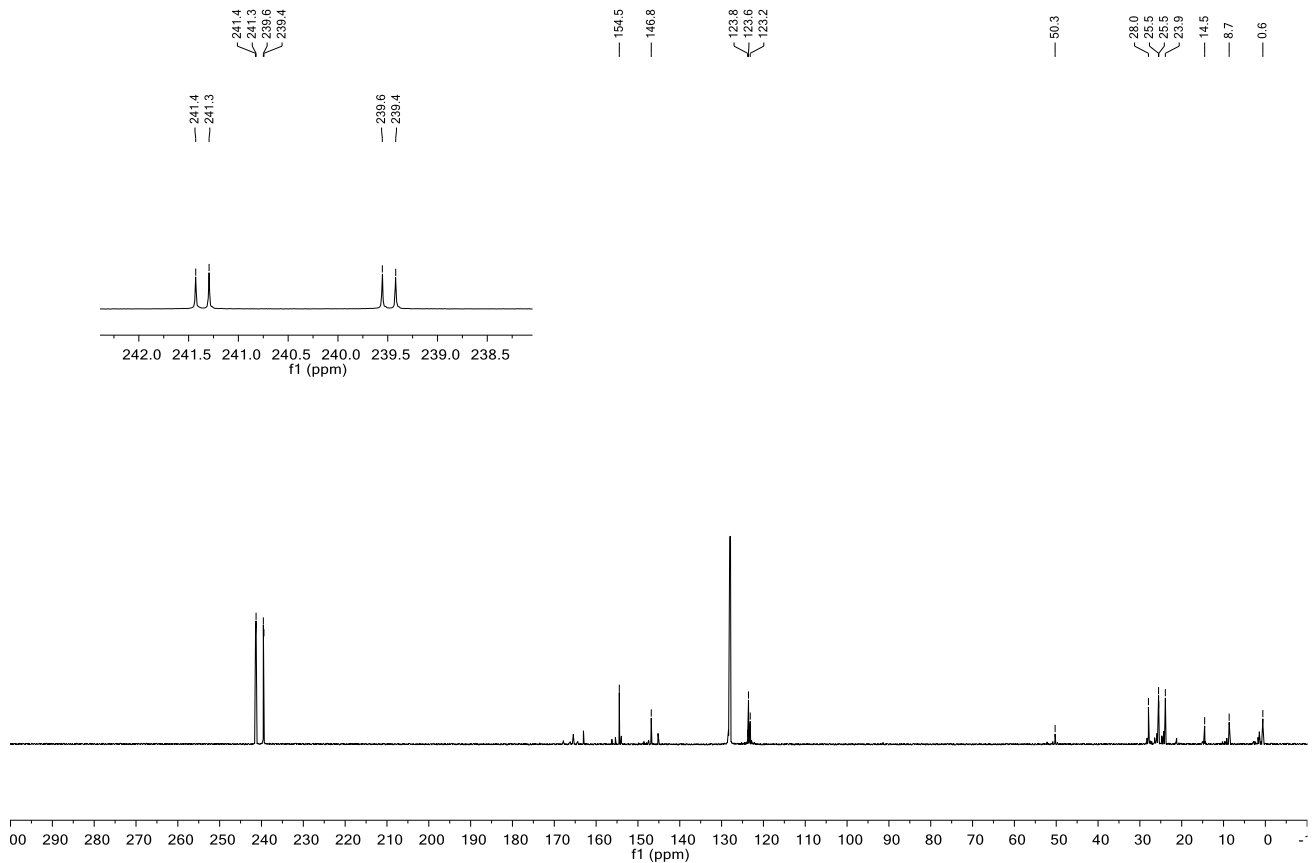

*Synthesis of {SiN<sup>Dipp</sup>}Al-O<sub>2</sub>C-Au{NHC<sup>iPr</sup>} (22)*

{SiN<sup>Dipp</sup>}Al-Au{NHC<sup>iPr</sup>} (**17**, 25mg, 0.028mmol) was dissolved in 0.4mL of C<sub>6</sub>D<sub>6</sub> inside a J Young's tube. The solution was then degassed by three cycles of freeze-pump-thaw before the tube was charged with 2 atm of <sup>13</sup>CO<sub>2</sub>. Full Conversion of the starting material was determined by <sup>1</sup>H and <sup>13</sup>C NMR spectra within 30 minutes of the addition of the CO<sub>2</sub> to the solution. The benzene solution was then put under reduced pressure to remove all volatiles and giving **22** as an off-white waxy solid. Yield 20 mg, 78%. Anal Calc'd for C<sub>42</sub>H<sub>70</sub>AlAuN<sub>4</sub>Si<sub>2</sub>O<sub>2</sub> (**22**, 943.17) C, 53.49; H, 7.48; N, 5.94 %. Found: C, 52.95; H, 8.07; N, 5.38 %. <sup>1</sup>H NMR (500 MHz, 298 K, Benzene-*d*<sub>6</sub>) δ 7.20-7.19 (m, 4H, *m*-C<sub>6</sub>H<sub>3</sub>), 7.11 – 7.08 (m, 2H, *p*-C<sub>6</sub>H<sub>3</sub>), 4.21 (sept, *J* = 6.8 Hz, 4H, CHMe<sub>2</sub> on N<sup>Dipp</sup>), 3.92 (sept, *J* = 7.2 Hz, 2H, CHMe<sub>2</sub> on NHC), 1.62 (d, *J* = 6.8 Hz, 12H, CHMe<sub>2</sub> on N<sup>Dipp</sup>), 1.47 (d, *J* = 6.8 Hz, 12H, CHMe<sub>2</sub> on N<sup>Dipp</sup>), 1.29 (s, 4H, SiCH<sub>2</sub>), 1.20 (s, 6H, NCM<sub>e</sub>), 1.09 (d, *J* = 7.2 Hz, 12H, CHMe<sub>2</sub> on NHC), 0.39 (s, br, 12H, SiMe<sub>2</sub>). <sup>13</sup>C{<sup>1</sup>H} NMR (126 MHz, 298 K, Benzene-*d*<sub>6</sub>) δ 239.1 (AuCO<sub>2</sub>), 146.8 (*i*-C<sub>6</sub>H<sub>3</sub>), 144.8 (*o*-C<sub>6</sub>H<sub>3</sub>), 124.8 (*m*-C<sub>6</sub>H<sub>3</sub>), 123.6 (*p*-C<sub>6</sub>H<sub>3</sub>), 123.3 (NCMe), 51.1 (NCHMe<sub>2</sub> on NHC), 28.0 (CHMe<sub>2</sub> on N<sup>Dipp</sup>), 25.5 (CHMe<sub>2</sub> on N<sup>Dipp</sup>), 23.9 (CHMe<sub>2</sub> on N<sup>Dipp</sup>), 23.2 (NCHMe<sub>2</sub> on NHC), 14.4 (SiCH<sub>2</sub>), 8.9 (NCMe), 0.5 (SiMe<sub>2</sub>). <sup>13</sup>C resonance correlated to AuC<sub>carbene</sub> was not observed.

**Figure S35.**  $^1\text{H}$  NMR spectrum of **22**. (500 MHz, 298 K, Benzene- $d_6$ )

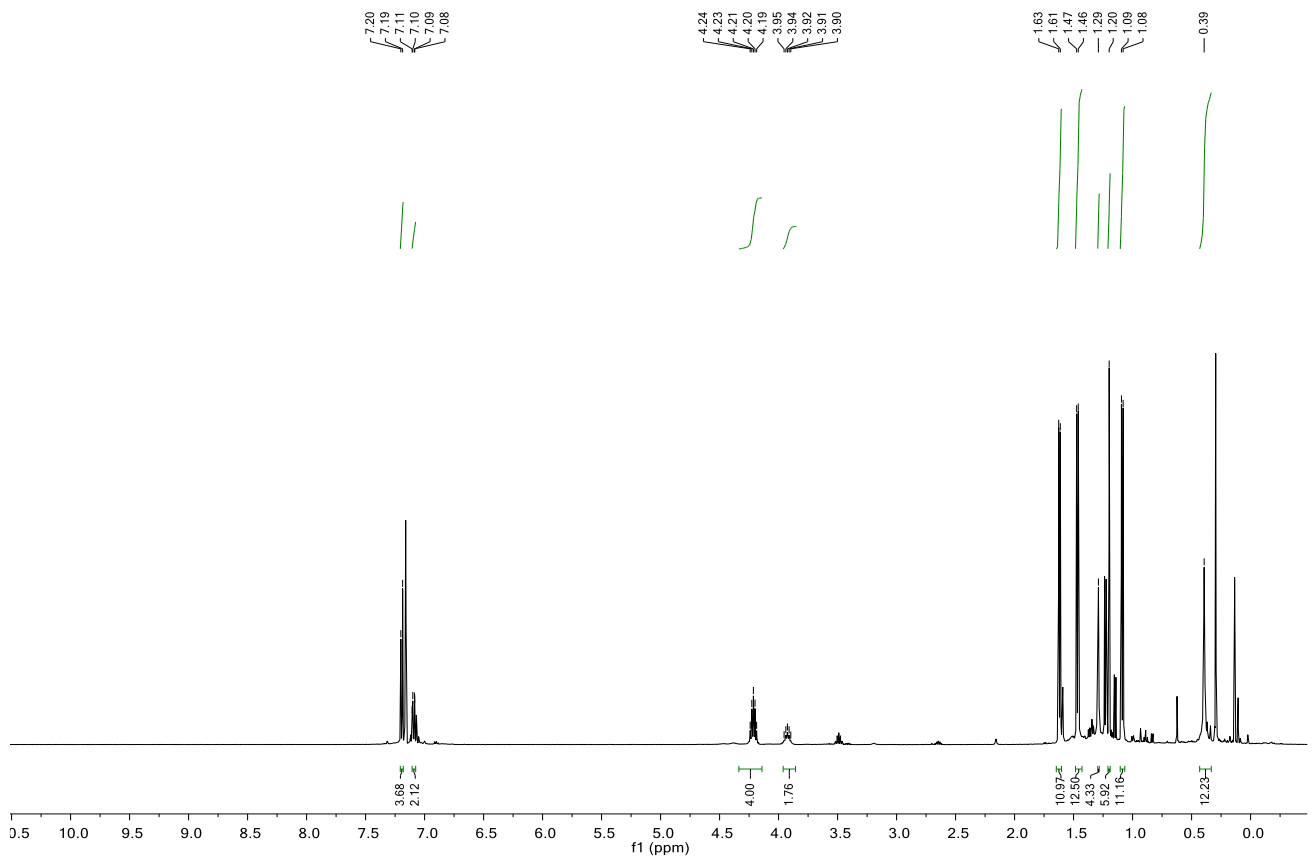

**Figure S36.**  $^{13}\text{C}\{^1\text{H}\}$  NMR spectrum of **22**. (126 MHz, 298 K, Benzene- $d_6$ )

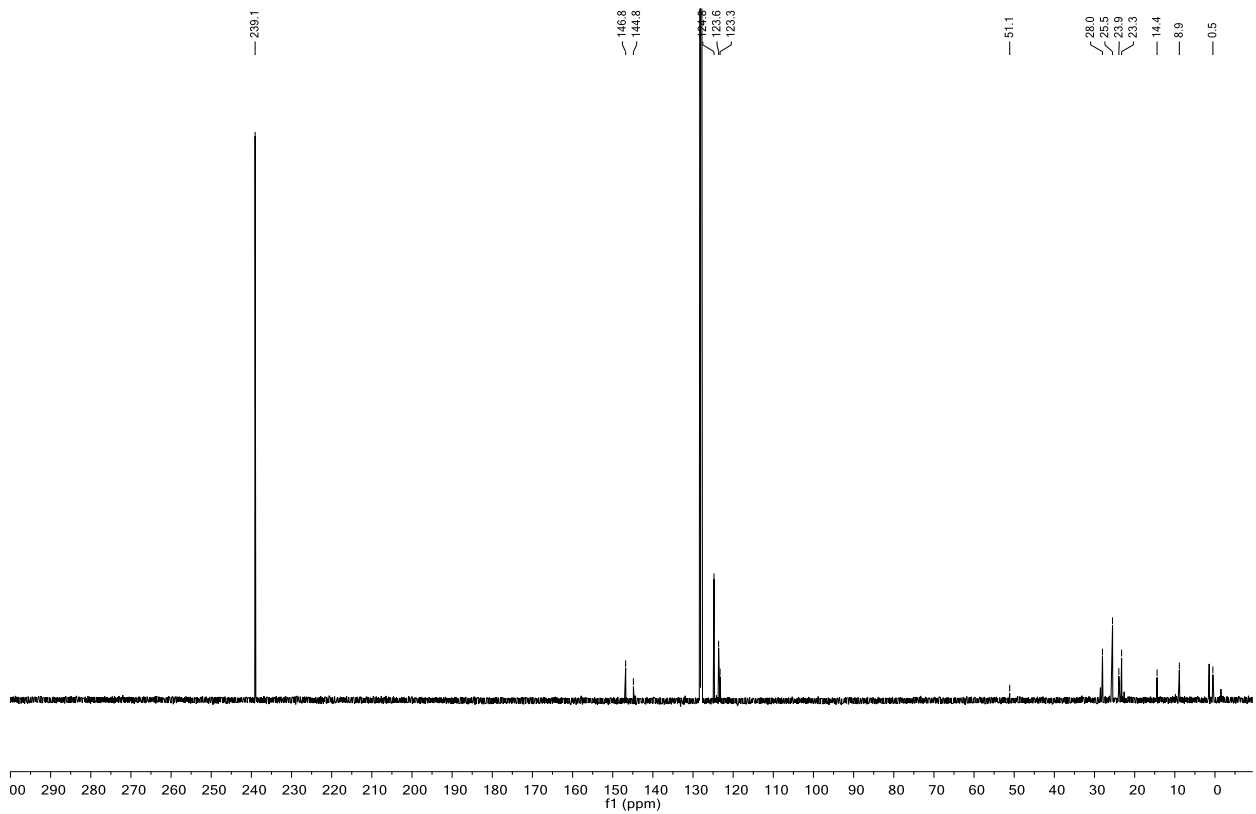



*Synthesis of {SiN<sup>Dipp</sup>}Al-Cu{P<sup>t</sup>Bu<sub>3</sub>} (**23**)*

Hexane (25 mL) was cannula transferred into a Schlenk flask charged with the mixture of tritertbutylphosphine (P<sup>t</sup>Bu<sub>3</sub>, 0.200 g, 1.00 mmol), CuCl (0.100 g, 1.00 mmol), and [{SiN<sup>Dipp</sup>}AlK]<sub>2</sub> (**3**, 0.560 g, 1.00 mmol). The resulting pale-yellow reaction mixture was left stirring overnight before filtering. The colourless filtrate was then collected, and all volatiles were removed *in vacuo* yielding **23** as a white solid. Yield 0.620 g, 78.7%. Colourless crystals suitable for X-ray crystallography were obtained by slow evaporation of a hexane solution at room temperature. Anal Calc'd for C<sub>42</sub>H<sub>77</sub>AlCuN<sub>2</sub>PSi<sub>2</sub> (**23**, 787.76) C, 64.04; H, 9.85; N, 3.56 %. Found: C, 63.85; H, 9.96; N, 3.69 %. <sup>1</sup>H NMR (500 MHz, 298 K, Benzene-*d*<sub>6</sub>) δ 6.94 (d, *J* = 7.9 Hz, 4H, *m*-C<sub>6</sub>H<sub>3</sub>), 6.82 (t, *J* = 7.9 Hz, 2H, *p*-C<sub>6</sub>H<sub>3</sub>), 3.85 (sept, *J* = 6.9 Hz, 4H, CHMe<sub>2</sub>), 1.29 (d, *J* = 6.9 Hz, 12H, CHMe<sub>2</sub>), 1.24 (d, *J* = 6.9 Hz, 12H, CHMe<sub>2</sub>), 1.01 (s, 4H, SiCH<sub>2</sub>), 0.69 (d, <sup>3</sup>*J*<sub>PH</sub> = 12.1 Hz, 27H, PCMe<sub>3</sub>), 0.19 (s, 12H, SiMe<sub>2</sub>). <sup>13</sup>C{<sup>1</sup>H} NMR (126 MHz, 298 K, Benzene-*d*<sub>6</sub>) δ 146.7, 145.7 (*i*- and *o*- C<sub>6</sub>H<sub>3</sub>), 123.2 (*m*-C<sub>6</sub>H<sub>3</sub>), 122.7 (*p*-C<sub>6</sub>H<sub>3</sub>), 32.7 (d, <sup>1</sup>*J*<sub>PC</sub> = 13.2 Hz, PCMe<sub>3</sub>), 32.2 (d, <sup>2</sup>*J*<sub>PC</sub> = 6.4 Hz, PCMe<sub>3</sub>), 28.6 (CHMe<sub>2</sub>), 26.0 (CHMe<sub>2</sub>), 24.3 (CHMe<sub>2</sub>), 14.4 (SiCH<sub>2</sub>), 1.6 (SiMe<sub>2</sub>). <sup>31</sup>P NMR (202 MHz, 298 K, Benzene-*d*<sub>6</sub>) δ 43.9.

**Figure S37.**  $^1\text{H}$  NMR spectrum of **23**. (500 MHz, 298 K, Benzene- $d_6$ ) \*free  $\text{P}'\text{Bu}_3$  impurity + grease

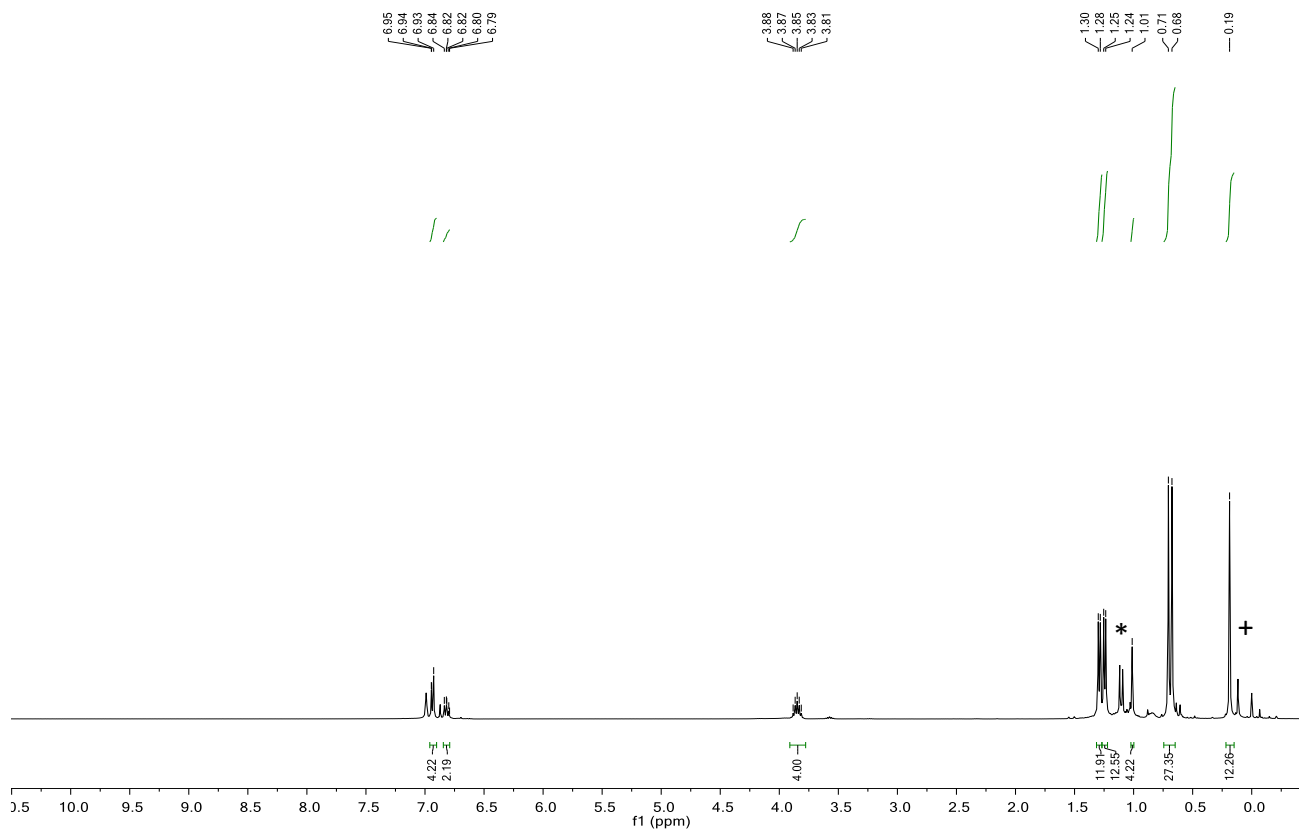

**Figure S38.**  $^{13}\text{C}\{^1\text{H}\}$  NMR spectrum of **23**. (126 MHz, 298 K, Benzene- $d_6$ ) \*free  $\text{P}'\text{Bu}_3$  impurity

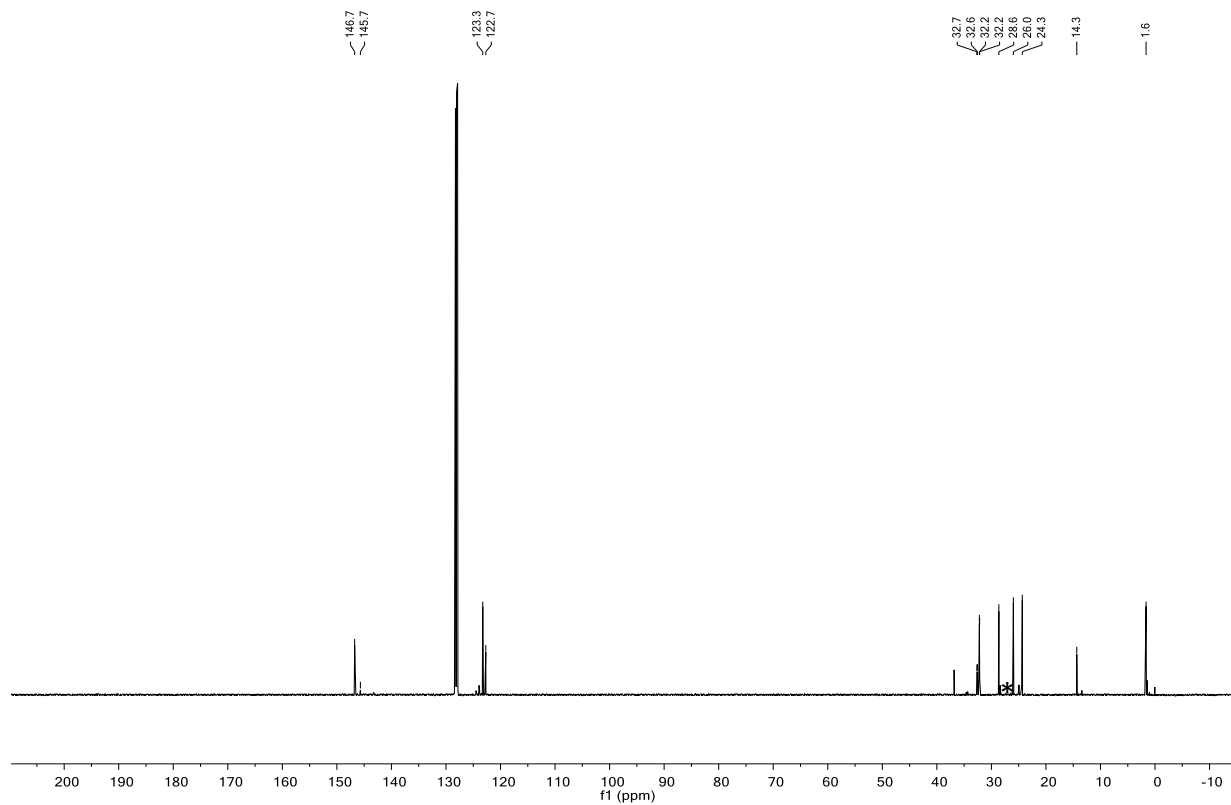

Figure S39.  $^{31}\text{P}\{^1\text{H}\}$  NMR spectrum of **23** (202 MHz, 298 K, Benzene- $d_6$ ) \*free  $\text{P}^t\text{Bu}_3$  impurity

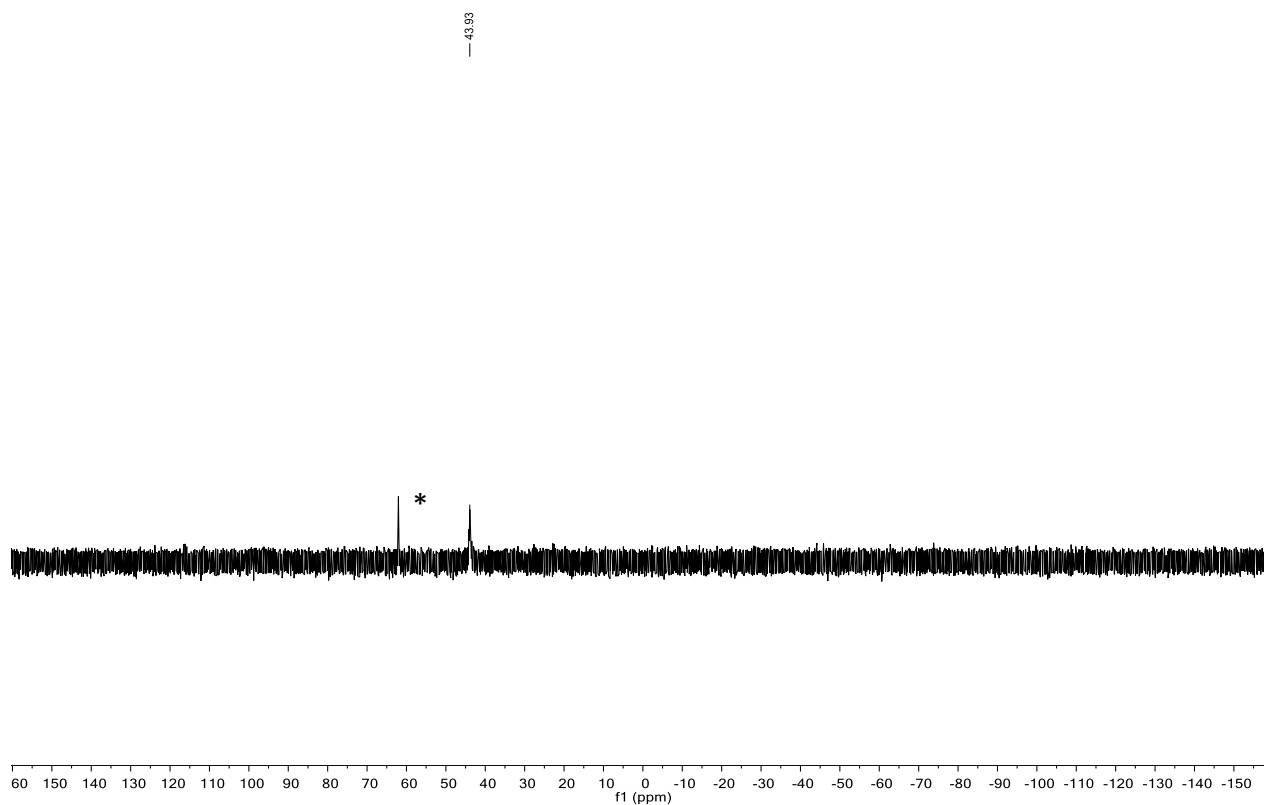

Figure S40.  $^1\text{H}\text{-}^1\text{H}$  COSY NMR spectrum of **23**.

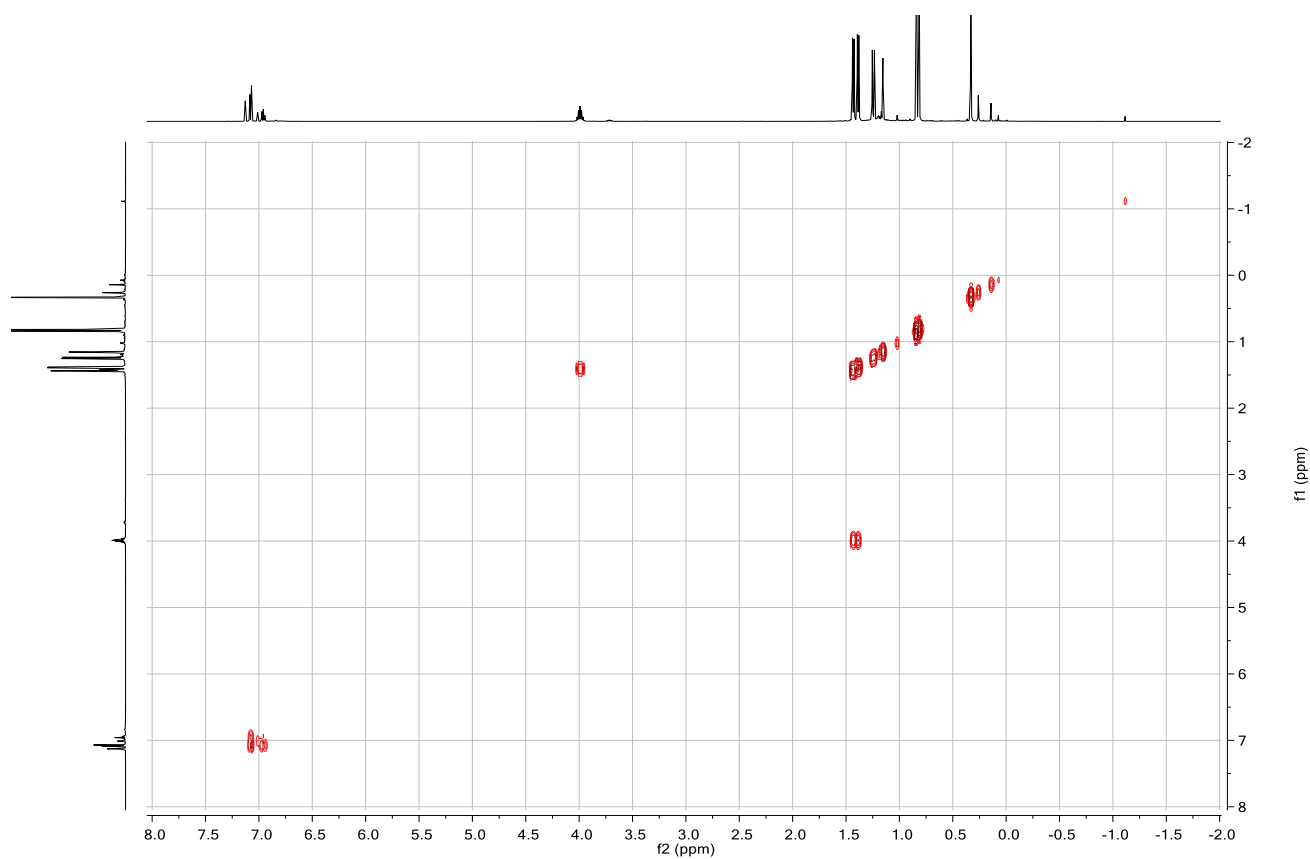

Figure S41.  $^1\text{H}$ - $^{13}\text{C}$  HSQC NMR spectrum of **23**.

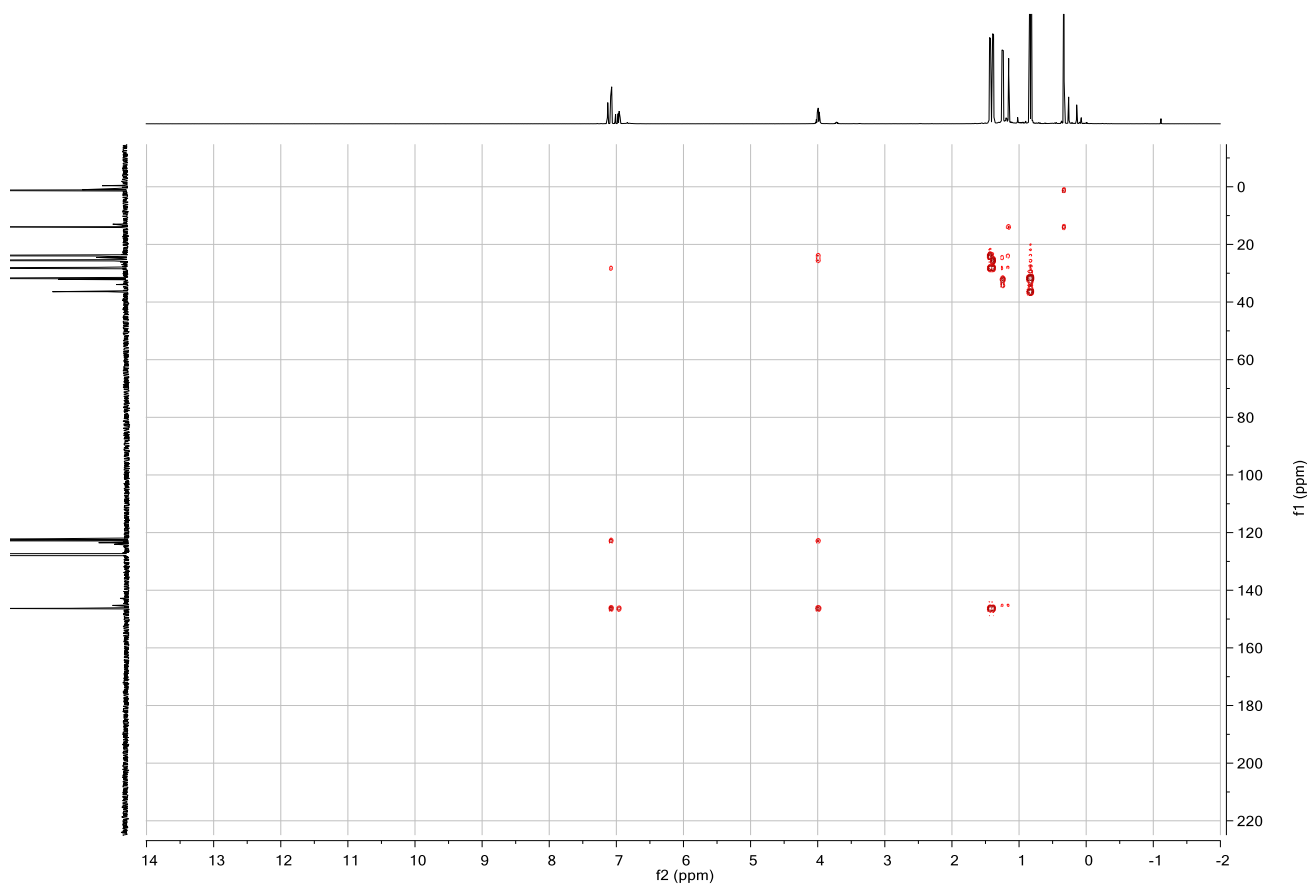

Figure S42.  $^1\text{H}$ - $^{13}\text{C}$  HMBC NMR spectrum of **23**.

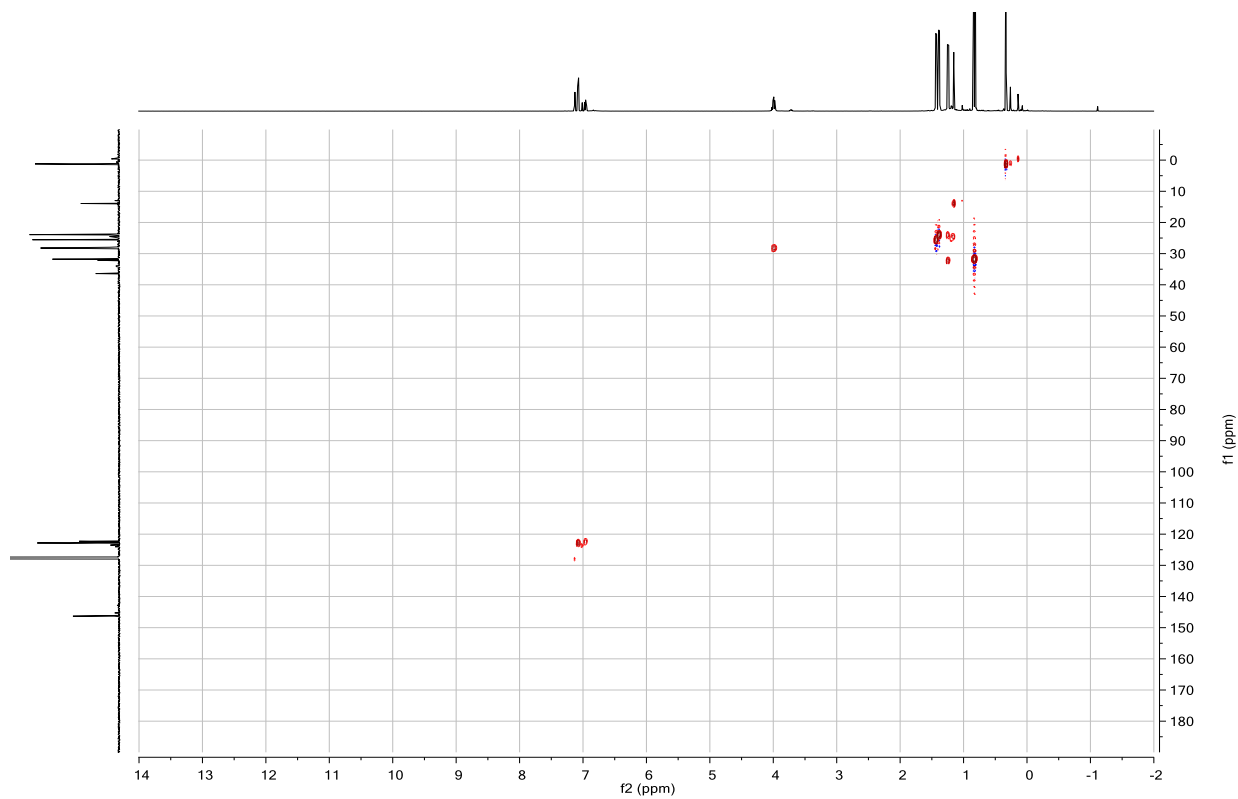

*Synthesis of {SiN<sup>Dipp</sup>}Al-(N<sup>iPr</sup>)<sub>2</sub>C-Cu{P<sup>t</sup>Bu<sub>3</sub>}(**24**)*

Inside a J Young's tube, {SiN<sup>Dipp</sup>}Al-Cu{P<sup>t</sup>Bu<sub>3</sub>} (**23**, 38.5mg, 0.05mmol) was dissolved in 0.4mL of C<sub>6</sub>D<sub>6</sub>, N,N'-diisopropylcarbodiimide (7.8μL, 0.05mmol) was then added via a micropipette. Total transformation was observed after the reaction mixture was left at room temperature for overnight. The benzene solution was then put under vacuum to remove all volatiles and giving **24** as waxy white solid. Colourless crystals suitable for X-ray crystallography were obtained by slow evaporation of a hexane solution at room temperature. Yield 35mg, 77%. Anal Calc'd for C<sub>49</sub>H<sub>91</sub>AlCuN<sub>4</sub>PSi<sub>2</sub> (**24**,913.97) C, 64.39; H, 10.04; N, 6.13 %. Found: C, 64.01; H, 9.93; N, 6.24 %. <sup>1</sup>H NMR (500 MHz, 298 K, Benzene-*d*<sub>6</sub>) δ 7.24 (d, *J* = 7.6 Hz, 4H, *m*-C<sub>6</sub>H<sub>3</sub>), 7.13 (t, *J* = 7.6 Hz, 2H, *p*-C<sub>6</sub>H<sub>3</sub>), 4.62-4.07 (m, 4H, CHMe<sub>2</sub>), 3.68-3.60 (m, 2H, NCHMe<sub>2</sub>), 1.65 – 1.32 (m, 30H, CHMe<sub>2</sub> on SiN<sup>Dipp</sup> and CN<sup>iPr</sup><sub>2</sub>), 1.30 – 1.21 (m, 4H, SiCH<sub>2</sub>), 0.97 (d, <sup>3</sup>*J*<sub>PH</sub> = 12.5 Hz, 27H, PCMe<sub>3</sub>), 0.64 – -0.16 (m, 12H, SiMe<sub>2</sub>). <sup>13</sup>C NMR (126 MHz, Benzene-*d*<sub>6</sub>) δ 218.0 (CuCN<sup>iPr</sup><sub>2</sub>), 149.1, 147.1 (*i*- and *o*-C<sub>6</sub>H<sub>3</sub>), 123.8 (*m*-C<sub>6</sub>H<sub>3</sub>), 122.2 (*p*-C<sub>6</sub>H<sub>3</sub>), 51.8 (NCHMe<sub>2</sub>), 36.4 (d, <sup>1</sup>*J*<sub>PC</sub> = 9.6Hz, PCMe<sub>3</sub>) 31.6 (d, <sup>2</sup>*J*<sub>PC</sub> = 5.5Hz, PCMe<sub>3</sub>), 26.4 (CHMe<sub>2</sub>), 25.8, 22.6 (CHMe<sub>2</sub> on N<sup>Dipp</sup> and CN<sup>iPr</sup><sub>2</sub>), 14.7 (SiCH<sub>2</sub>), 1.0 (SiMe<sub>2</sub>). <sup>31</sup>P NMR (202 MHz, Benzene-*d*<sub>6</sub>) δ 59.8.

Figure S43.  $^1\text{H}$  NMR spectrum of **24**. (500 MHz, 298 K, Benzene- $d_6$ )

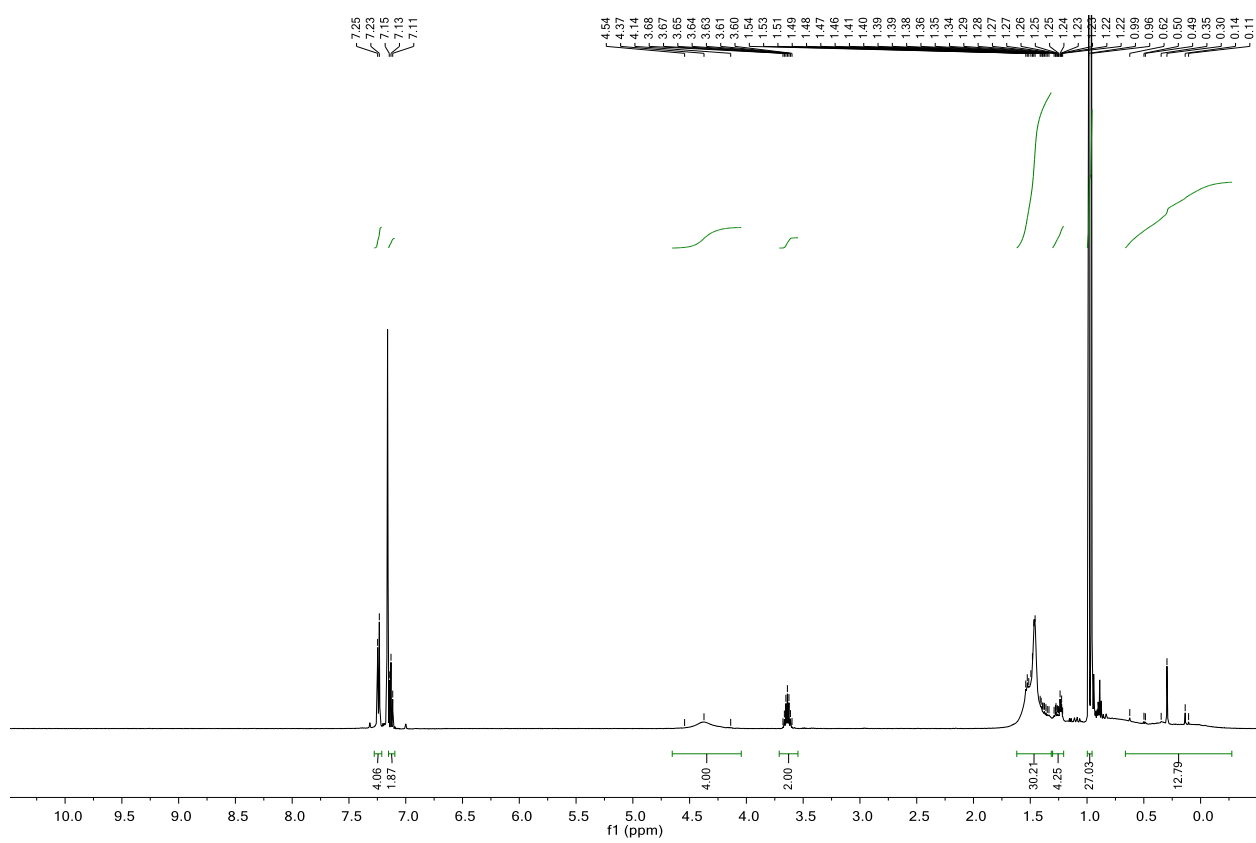

Figure S44.  $^{13}\text{C}\{^1\text{H}\}$  NMR spectrum of **24**. (126 MHz, 298 K, Benzene- $d_6$ )

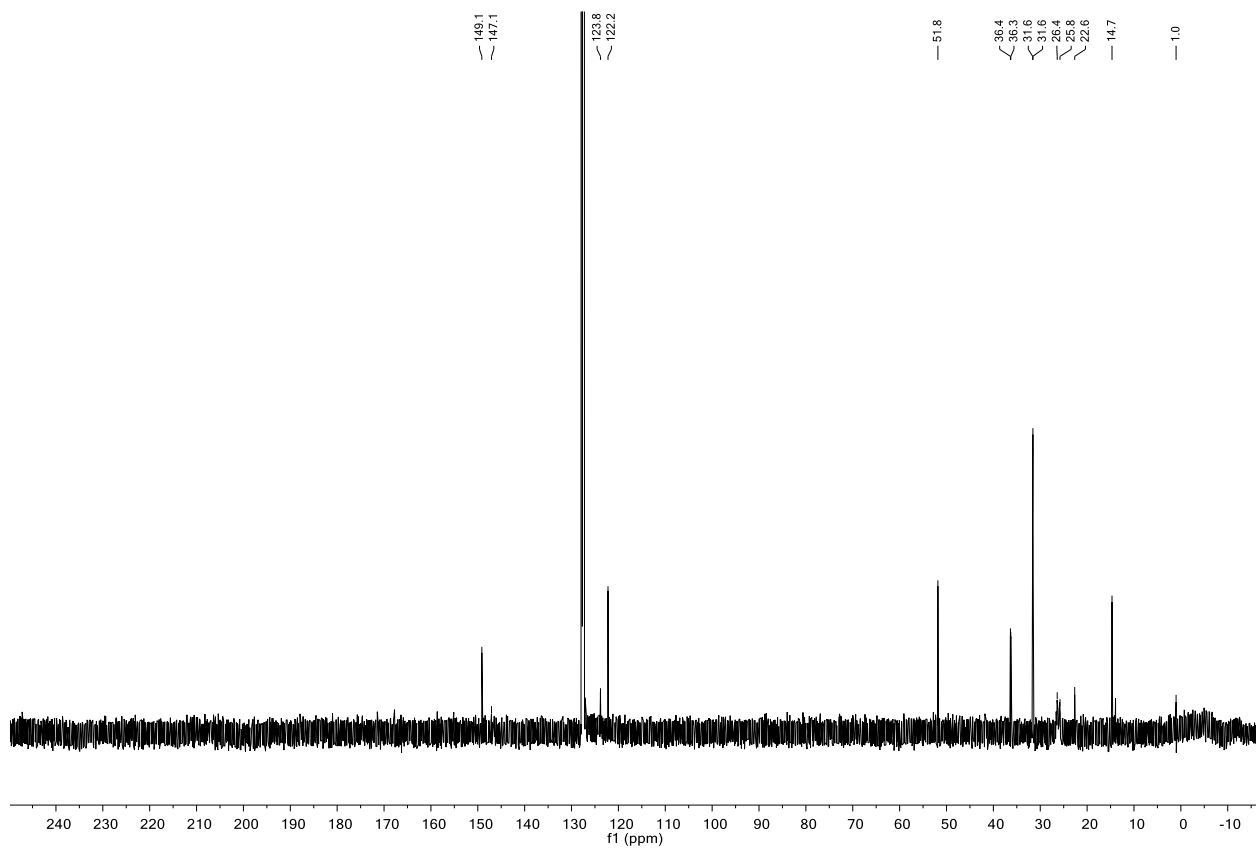

Figure S45.  $^{31}\text{P}$  NMR spectrum of **24**. (202 MHz, 298K, Benzene- $d_6$ )

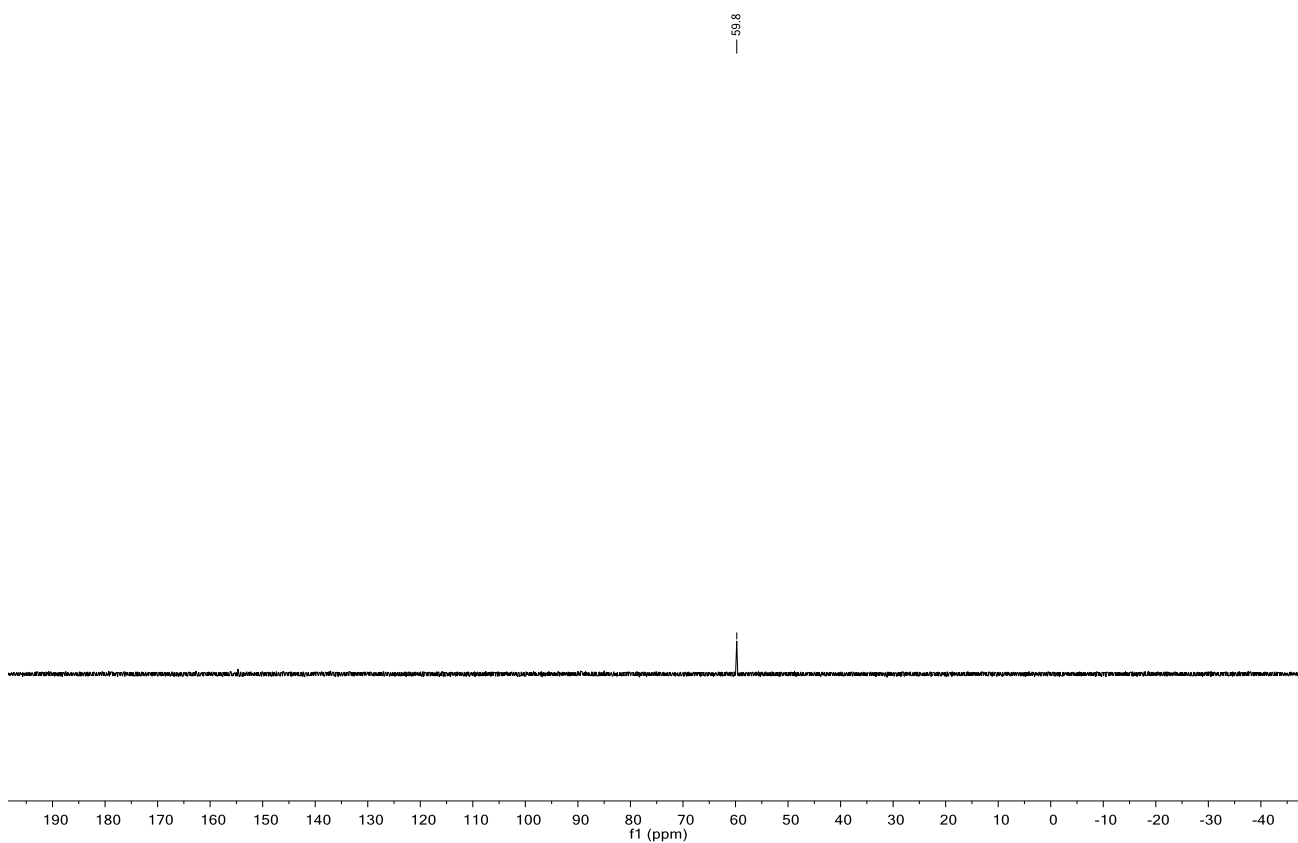

Figure S46.  $^1\text{H}$ - $^1\text{H}$  COSY NMR spectrum of **24**.

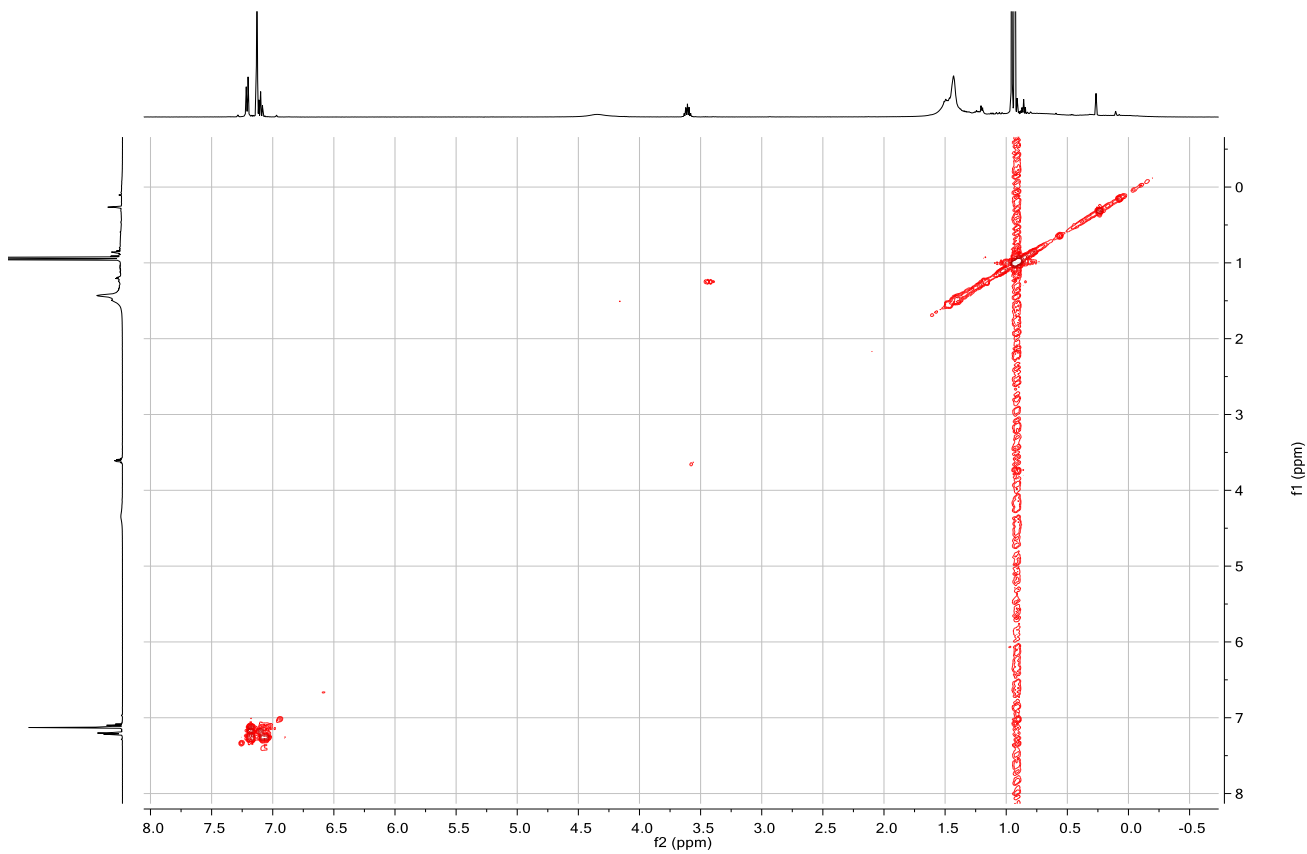

Figure S47.  $^1\text{H}$ - $^{13}\text{C}$  HSQC NMR spectrum of **24**.

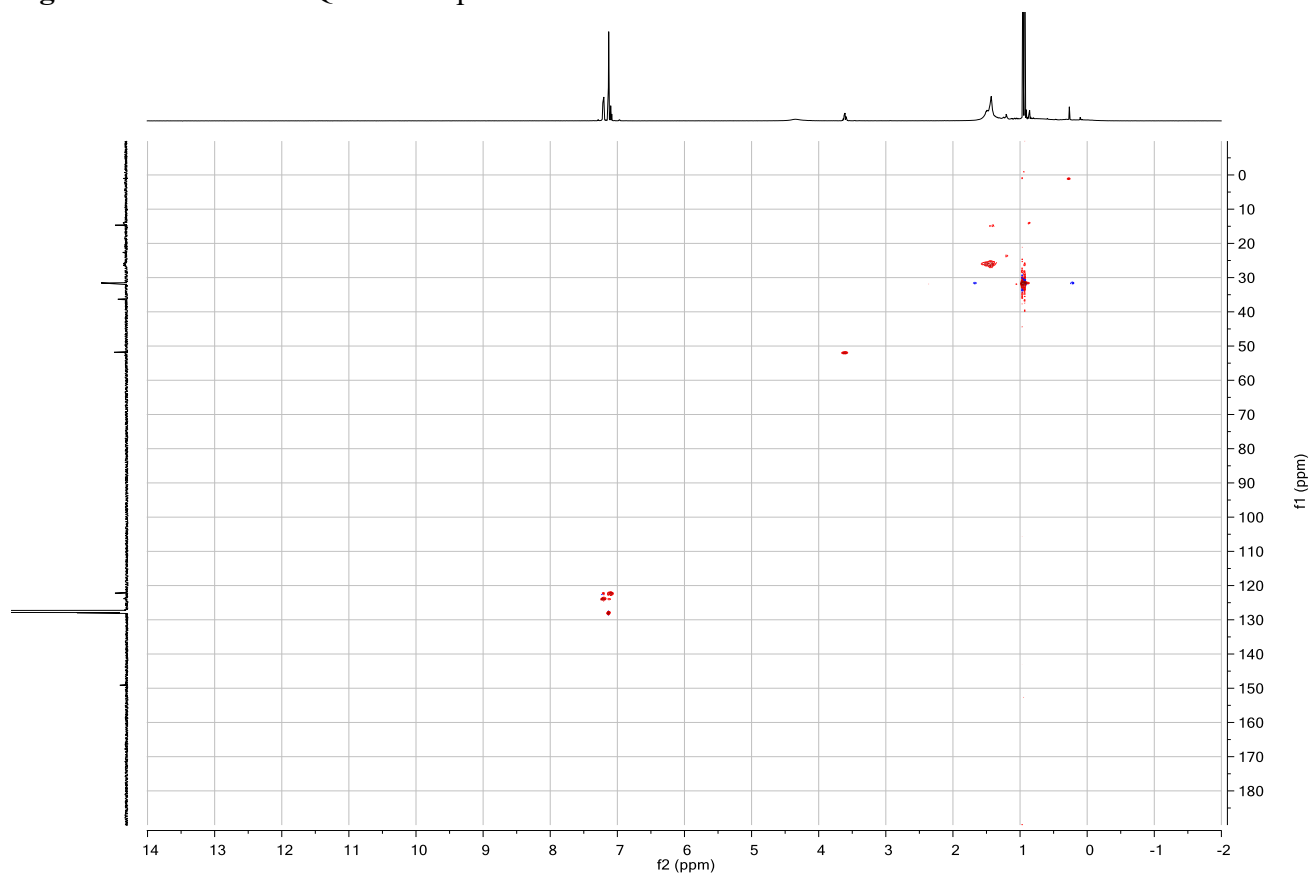

Figure S48.  $^1\text{H}$ - $^{13}\text{C}$  HMBC NMR spectrum of **24**.

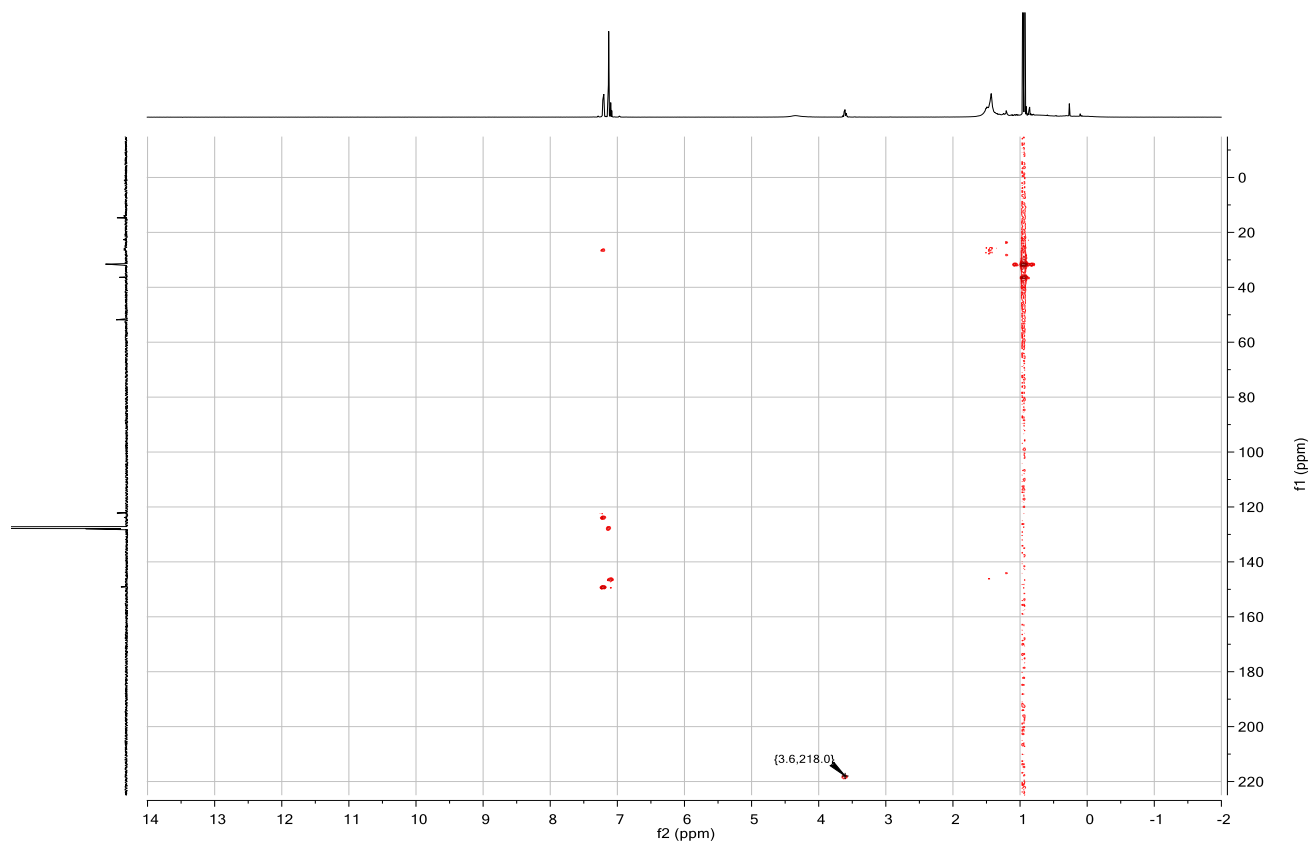



*Synthesis of {SiN<sup>Dipp</sup>}Al-O<sub>2</sub>C-Cu{P<sup>t</sup>Bu<sub>3</sub>}(25)*

{SiN<sup>Dipp</sup>}Al-Cu{P<sup>t</sup>Bu<sub>3</sub>} (**23**, 25mg, 0.032mmol) was dissolved in 0.4mL of C<sub>6</sub>D<sub>6</sub> inside a J Young's tube. The solution was then degassed by three cycles of freeze-pump-thaw before the tube was charged with 2 atm of <sup>13</sup>CO<sub>2</sub>. Full Conversion of the starting material was determined by <sup>1</sup>H and <sup>13</sup>C NMR spectra within 30 minutes of the addition of the CO<sub>2</sub> to the solution. The benzene solution was then put under reduced pressure to remove all volatiles and giving **25** as an off-white solid. Yield 20 mg, 77 %. No meaningful result was obtained for elemental analysis after multiple attempts. <sup>1</sup>H NMR (500 MHz, 298 K, Benzene-d<sub>6</sub>) δ 7.14-7.10 (m, 4H, *m*-C<sub>6</sub>H<sub>3</sub>), 7.04-6.98 (m, 2H, *p*-C<sub>6</sub>H<sub>3</sub>), 4.15 (sept, *J* = 6.9 Hz, 4H, CHMe<sub>2</sub>), 1.53 (d, *J* = 6.9 Hz, 12H, CHMe<sub>2</sub>), 1.44 (d, *J* = 6.9 Hz, 12H, CHMe<sub>2</sub>), 1.27 (s, 4H, SiCH<sub>2</sub>), 0.80 (d, <sup>3</sup>*J*<sub>PH</sub> = 12.9 Hz, 27H, CMe<sub>3</sub>), 0.37 (s, 12H, SiMe<sub>2</sub>). <sup>13</sup>C{<sup>1</sup>H} NMR (126 MHz, 298 K, Benzene-d<sub>6</sub>) δ 233.1 (d, <sup>2</sup>*J*<sub>PC</sub> = 73.9Hz, CuCO<sub>2</sub>) 146.8 (*o*-C<sub>6</sub>H<sub>3</sub>), 145.0 (*i*-C<sub>6</sub>H<sub>3</sub>), 123.5 (*m*-C<sub>6</sub>H<sub>3</sub>), 123.2 (*p*-C<sub>6</sub>H<sub>3</sub>), 36.4 (CMe<sub>3</sub>), 31.9 (CMe<sub>3</sub>), 27.9 (CHMe<sub>2</sub>), 25.4 (CHMe<sub>2</sub>), 25.4 (CHMe<sub>2</sub>), 14.4 (SiCH<sub>2</sub>), 0.5 (SiMe<sub>2</sub>). <sup>31</sup>P{<sup>1</sup>H} NMR (202 MHz, Benzene-d<sub>6</sub>) δ 59.8.

**Figure S49.**  $^1\text{H}$  NMR spectrum of **25**. (500 MHz, 298 K, Benzene- $d_6$ )

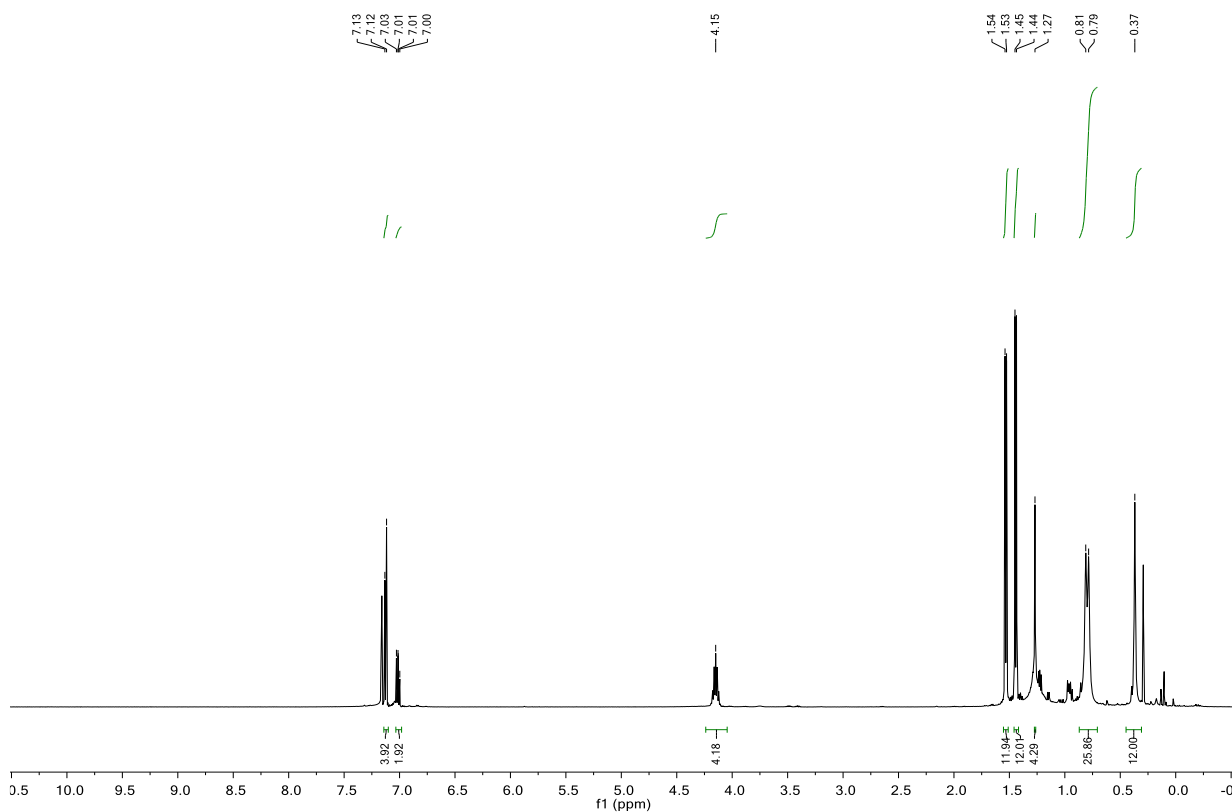

**Figure S50.**  $^{13}\text{C}\{^1\text{H}\}$  NMR spectrum of **25**. (126 MHz, 298 K, Benzene- $d_6$ )

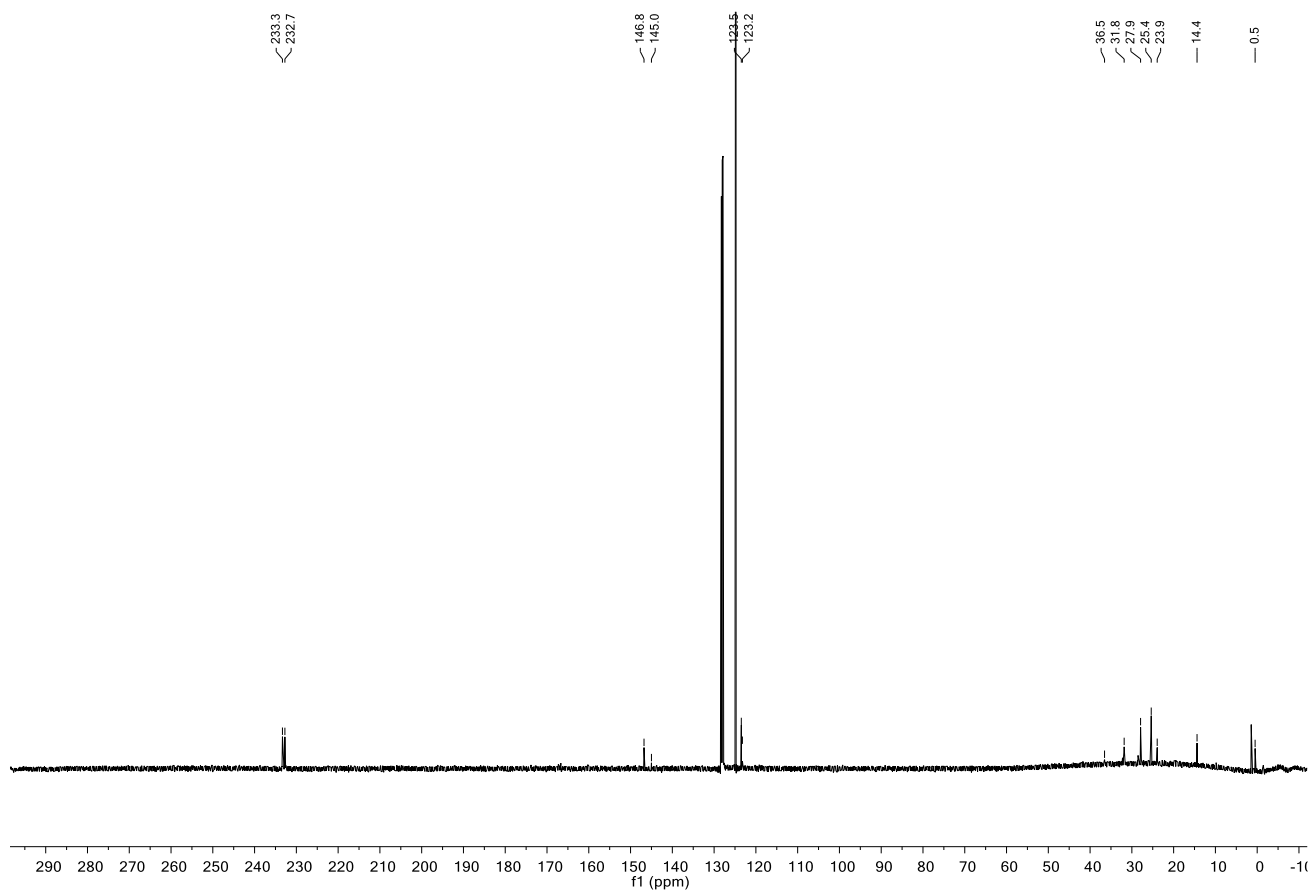

**Figure S51.**  $^{31}\text{P}\{^1\text{H}\}$  NMR spectrum of **25**. (202 MHz, 298 K, Benzene- $d_6$ )

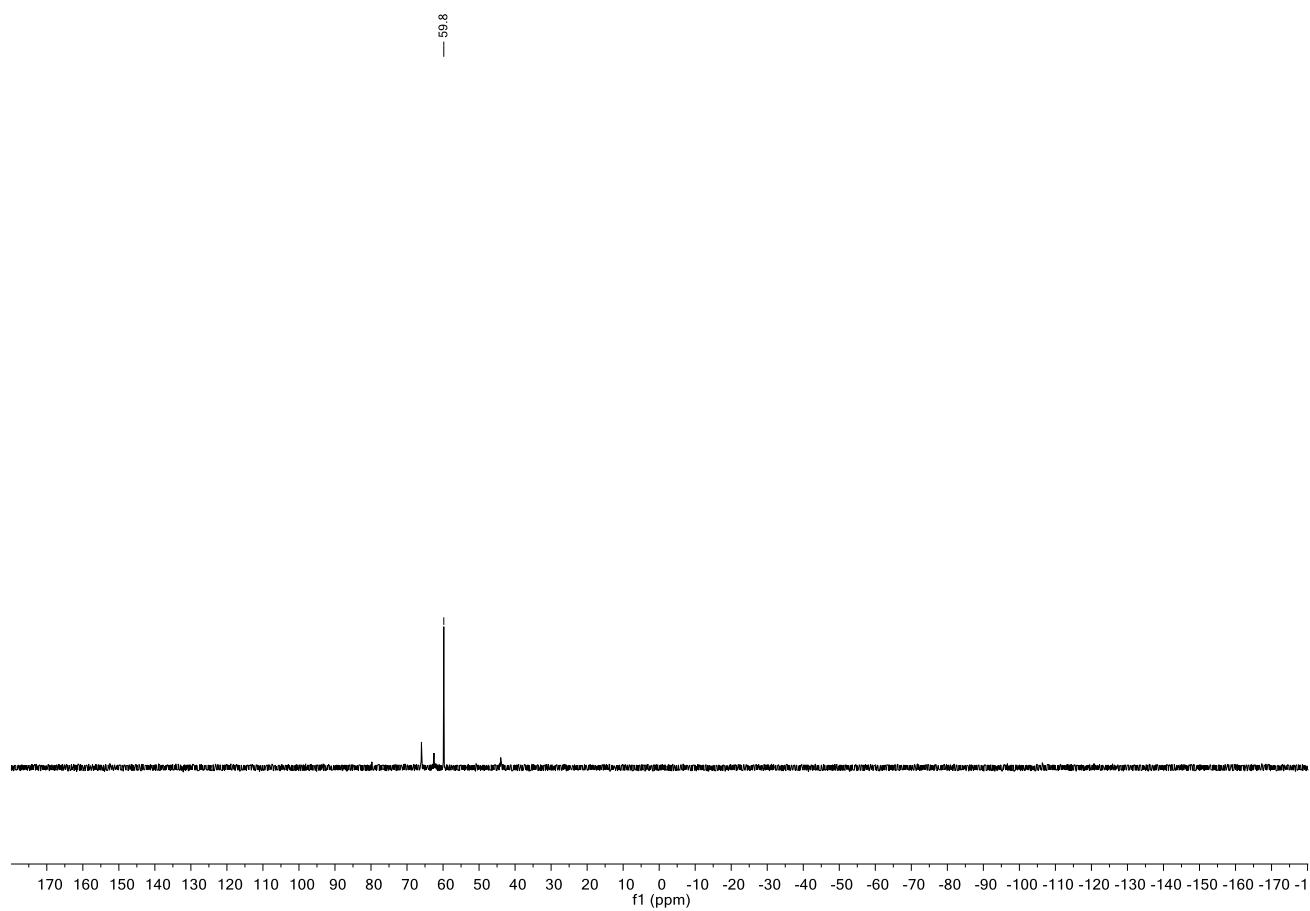

*{SiN<sup>Dipp</sup>}Al-O<sub>2</sub>C-Cu{P<sup>t</sup>Bu<sub>3</sub>} (25) thermal stability test*

The d<sub>6</sub>-benzene solution of **25** was kept at room temperature for three days, no significant change was observed by <sup>1</sup>H or <sup>13</sup>C NMR spectrum. The sample was then kept at 60 °C overnight, then monitored by NMR spectra. Further transformation was observed, especially with the disappearance of <sup>13</sup>C resonance at 233.1 (CuCO<sub>2</sub>) ppm and the emergence of new sharp <sup>13</sup>C resonance at 166.7, 168.4, 176.7 ppm; as well as in in <sup>31</sup>P NMR spectrum, the diminishing of the peak at 59.8 ppm and the new peak at 62.1 ppm.

**Figure S52.**  $^1\text{H}$  NMR spectrum of **25** after kept at  $60^\circ\text{C}$  overnight. (500 MHz, 298 K, Benzene- $d_6$ )

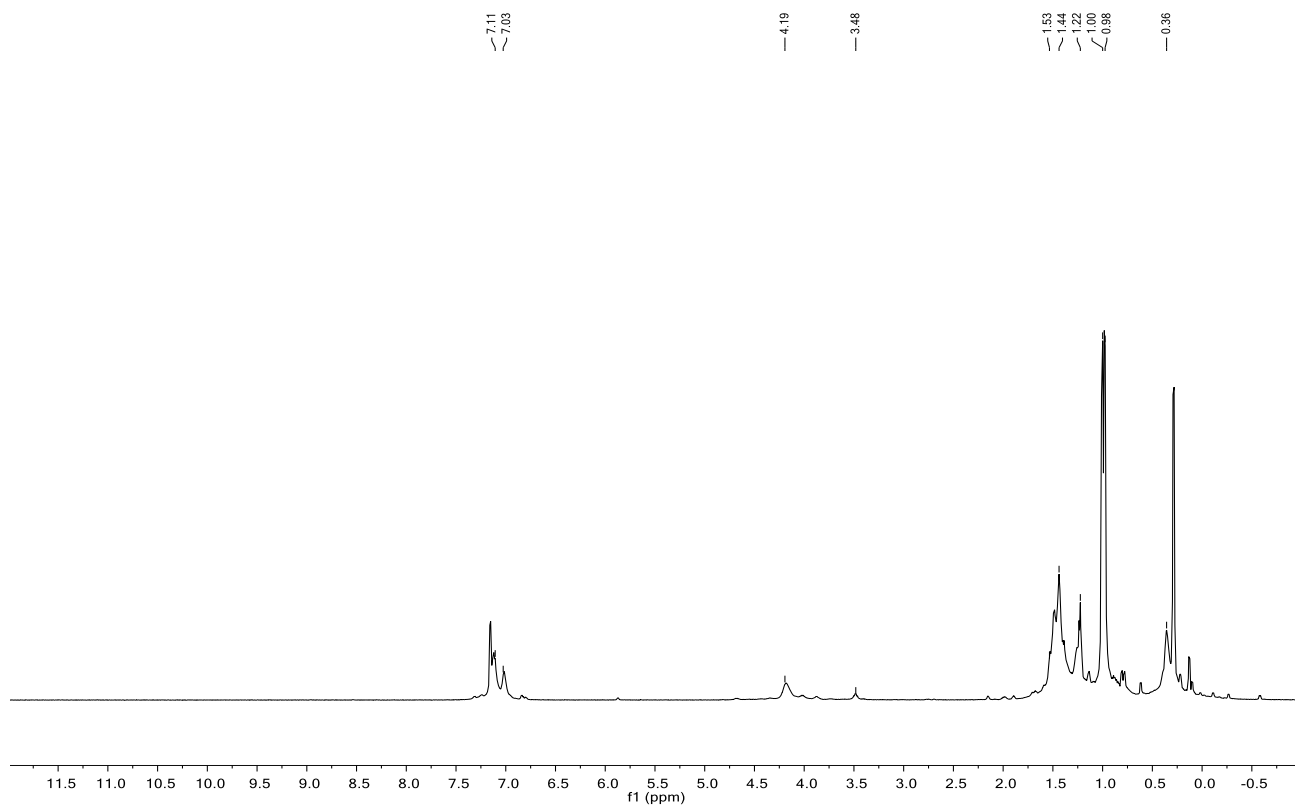

**Figure S53.**  $^{13}\text{C}\{^1\text{H}\}$  NMR spectrum of **25** after kept at  $60^\circ\text{C}$  overnight. (126 MHz, 298 K, Benzene- $d_6$ )

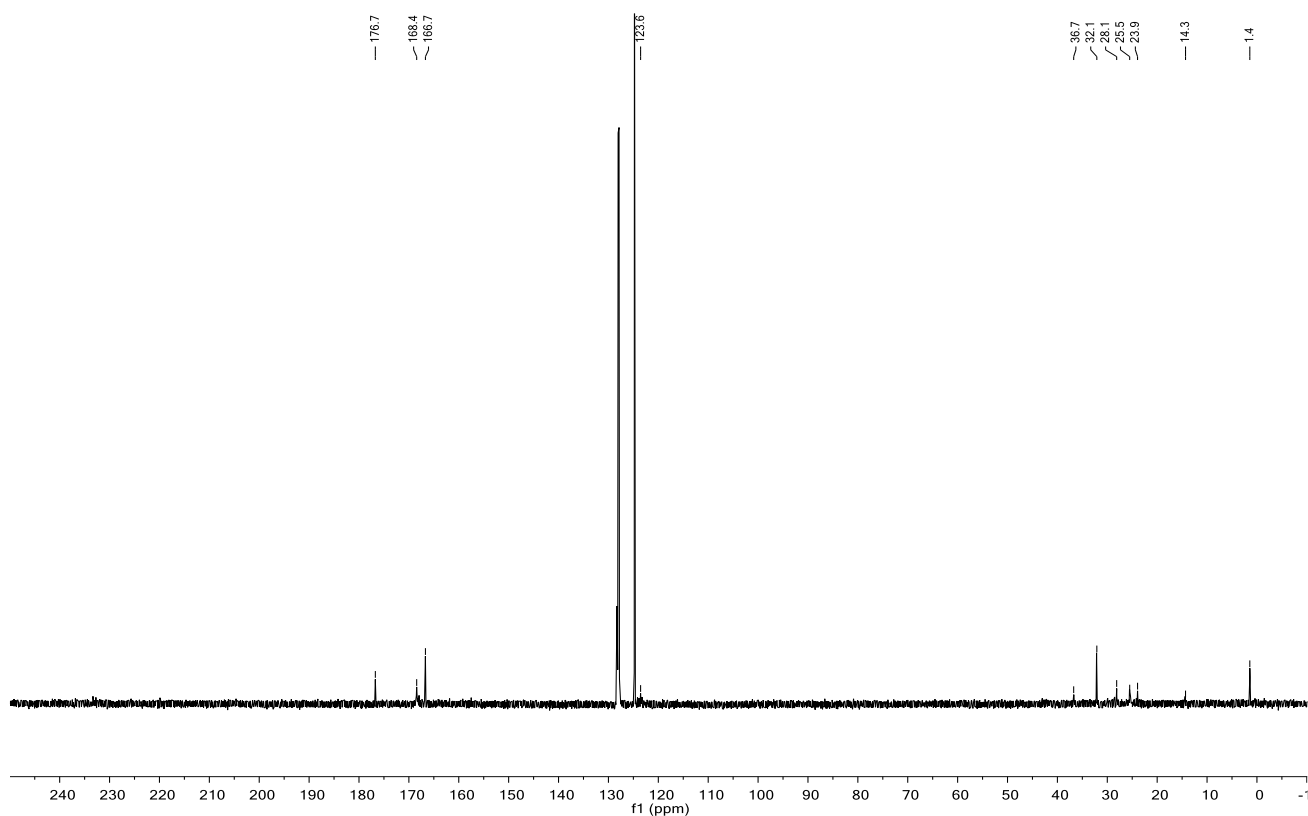

**Figure S54.**  $^{31}\text{P}\{^1\text{H}\}$  NMR spectrum of **25** after kept at 60°C overnight. (202 MHz, 298 K, Benzene- $d_6$ )

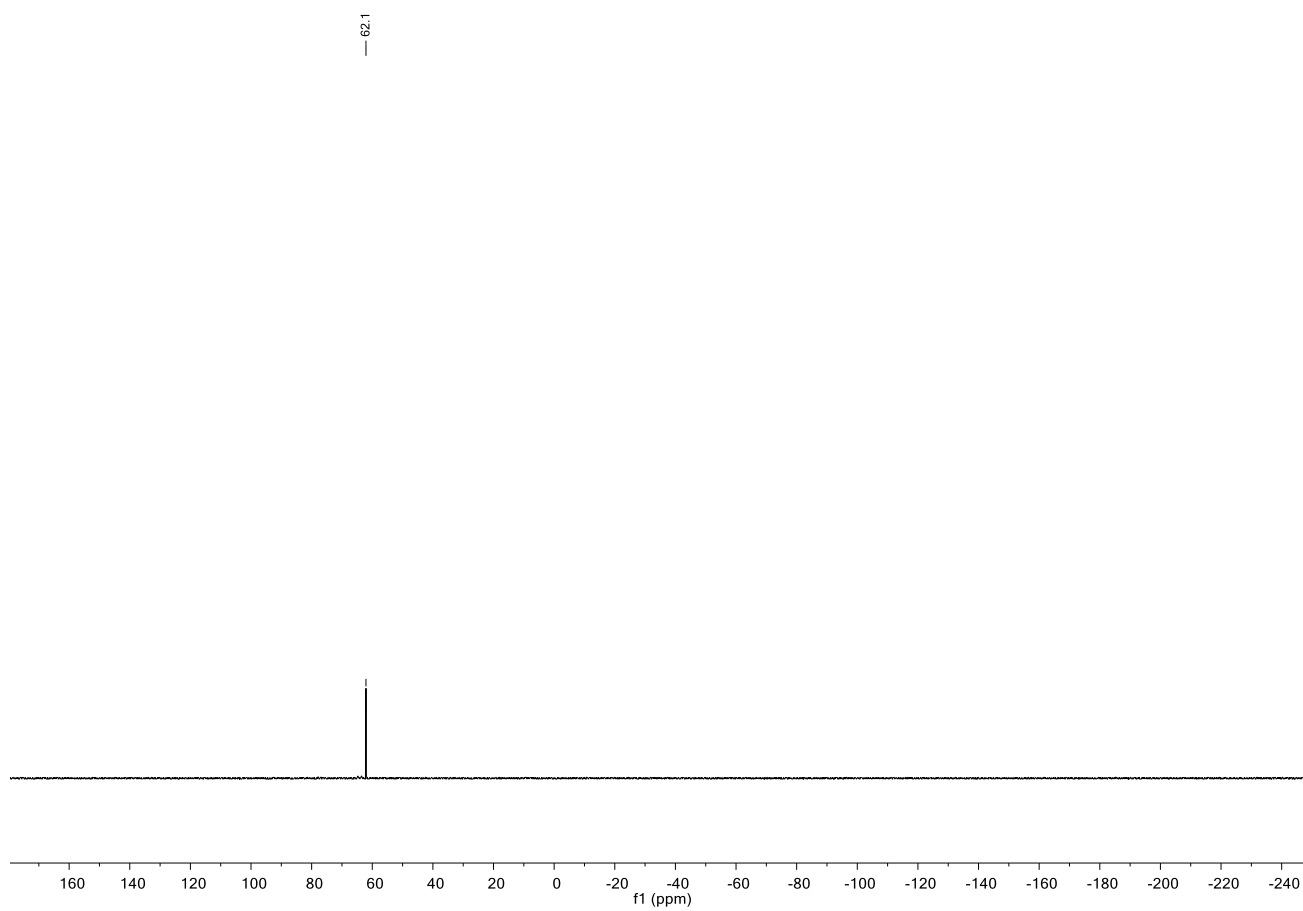

### **Single Crystal X-ray Diffraction Analysis:**

Single Crystal X-ray diffraction data for compounds **17** – **20**, **23** and **24** were collected on a SuperNova, EosS2 diffractometer using CuK $\alpha$  ( $\lambda = 1.54184 \text{ \AA}$ ) radiation throughout. The crystals were maintained at 150 K during data collection. Using Olex2,<sup>5</sup> the structures were solved with the olex2.solve<sup>6</sup> structure solution program or ShelXT and refined with the ShelXL<sup>7</sup> refinement package using Least Squares minimization.

It was clear from the diffraction data collected for compound **17** that the sample was twinned. This was addressed at the point of data reduction where, raw data were integrated as arising from two components. There was evidence of a very minor third component, but the intensity of diffraction from same was so low that this was ultimately ignored. The esds associated with the metric parameters are larger than one might wish for in this structure, but the characterisation is unequivocal.

The asymmetric unit of **19** comprises two molecules of the silver/aluminium containing complex. Disorder was present in both of the NHC rings. In particular, N3, N4, N9, N10, C35-C38 and C83-C86 were each disordered over two sites in a 55:45 ratio. Distance and ADP restraints were used in disordered regions to assist convergence. Residual electron density maxima are located at chemically insignificant distances from the silver centres.

The structure of **20** contains two crystallographically independent molecules of the gold complex and three regions of solvent. Disorder in the main feature was confined to the isopropyl group attached to N3 wherein all three carbons were treated for 63:37 disorder. The solvent of recrystallisation was methylcyclohexane, and three fractional occupancy moieties of same were evident in the asymmetric unit. However, in addition to having 50% site-occupancies approximately, disorder was prevalent in each of these solvent regions. In order to avoid over parameterisation of the model, given the paucity of electron density at each site due to this disorder, solvent was ultimately addressed using the solvent mask algorithm available in Olex-2. However, an allowance has been made for 1.5 molecules of methylcyclohexane per asymmetric unit in the formula, as presented.

65:35 disorder was evident for all phosphine carbons in the structure of **24**. This was modelled with the inclusion of distance and ADP restraints, with respect to fractional occupancy atoms, to assist convergence.

**Table S1:** Crystal data and structure refinement for compounds **17 - 19**.

| Compound                                                     | <b>17</b>                                                                     | <b>18</b>                                                                     | <b>19</b>                                                                                        |
|--------------------------------------------------------------|-------------------------------------------------------------------------------|-------------------------------------------------------------------------------|--------------------------------------------------------------------------------------------------|
| Empirical formula                                            | C <sub>48</sub> H <sub>84</sub> AlAuN <sub>4</sub> Si <sub>2</sub>            | C <sub>53</sub> H <sub>85</sub> AgAlN <sub>3</sub> Si <sub>2</sub>            | C <sub>96</sub> H <sub>168</sub> Ag <sub>2</sub> Al <sub>2</sub> N <sub>12</sub> Si <sub>4</sub> |
| Formula weight                                               | 997.31                                                                        | 955.26                                                                        | 1872.47                                                                                          |
| Crystal system                                               | monoclinic                                                                    | orthorhombic                                                                  | orthorhombic                                                                                     |
| Space group                                                  | <i>P2<sub>1</sub>/n</i>                                                       | <i>Pbca</i>                                                                   | <i>Pna2<sub>1</sub></i>                                                                          |
| <i>a</i> /Å                                                  | 9.9421(2)                                                                     | 17.8026(3)                                                                    | 24.3646(2)                                                                                       |
| <i>b</i> /Å                                                  | 18.8454(5)                                                                    | 20.9308(3)                                                                    | 10.9273(1)                                                                                       |
| <i>c</i> /Å                                                  | 27.7494(9)                                                                    | 28.5781(4)                                                                    | 39.1524(3)                                                                                       |
| $\alpha$ /°                                                  | 90                                                                            | 90                                                                            | 90                                                                                               |
| $\beta$ /°                                                   | 96.781(3)                                                                     | 90                                                                            | 90                                                                                               |
| $\gamma$ /°                                                  | 90                                                                            | 90                                                                            | 90                                                                                               |
| Volume/Å <sup>3</sup>                                        | 5162.8(3)                                                                     | 10648.8(3)                                                                    | 10423.91(15)                                                                                     |
| <i>Z</i>                                                     | 4                                                                             | 8                                                                             | 4                                                                                                |
| $\rho_{\text{calc}}$ g/cm <sup>3</sup>                       | 1.283                                                                         | 1.192                                                                         | 1.193                                                                                            |
| $\mu$ /mm <sup>-1</sup>                                      | 6.208                                                                         | 3.884                                                                         | 3.973                                                                                            |
| <i>F</i> (000)                                               | 2080.0                                                                        | 4096.0                                                                        | 4016.0                                                                                           |
| Crystal size/mm <sup>3</sup>                                 | 0.135 × 0.080 × 0.060                                                         | 0.182 × 0.106 × 0.044                                                         | 0.171 × 0.09 × 0.054                                                                             |
| 2 $\theta$ range /°                                          | 7.95 to 146.308                                                               | 7.216 to 146.282                                                              | 7.6 to 142.748                                                                                   |
| Index ranges                                                 | -12 ≤ <i>h</i> ≤ 12, -23 ≤ <i>k</i> ≤ 23, -34 ≤ <i>l</i> ≤ 34                 | -21 ≤ <i>h</i> ≤ 21, -12 ≤ <i>k</i> ≤ 25, -35 ≤ <i>l</i> ≤ 35                 | -29 ≤ <i>h</i> ≤ 29, -13 ≤ <i>k</i> ≤ 13, -48 ≤ <i>l</i> ≤ 42                                    |
| Reflections collected                                        | 14179                                                                         | 38287                                                                         | 121205                                                                                           |
| Independent reflections                                      | 14179 [ <i>R</i> <sub>int</sub> = 0.0790, <i>R</i> <sub>sigma</sub> = 0.0721] | 10516 [ <i>R</i> <sub>int</sub> = 0.0470, <i>R</i> <sub>sigma</sub> = 0.0436] | 15006 [ <i>R</i> <sub>int</sub> = 0.0531, <i>R</i> <sub>sigma</sub> = 0.0364]                    |
| Data/restraints/parameters                                   | 14179/0/525                                                                   | 10516/0/559                                                                   | 15006/115/1201                                                                                   |
| Goodness-of-fit on <i>F</i> <sup>2</sup>                     | 0.898                                                                         | 1.023                                                                         | 1.045                                                                                            |
| Final <i>R</i> indexes [ <i>I</i> ≥ 2 $\sigma$ ( <i>I</i> )] | <i>R</i> <sub>1</sub> = 0.0662, <i>wR</i> <sub>2</sub> = 0.1585               | <i>R</i> <sub>1</sub> = 0.0374, <i>wR</i> <sub>2</sub> = 0.0946               | <i>R</i> <sub>1</sub> = 0.0571, <i>wR</i> <sub>2</sub> = 0.1422                                  |
| Final <i>R</i> indexes [all data]                            | <i>R</i> <sub>1</sub> = 0.0988, <i>wR</i> <sub>2</sub> = 0.1739               | <i>R</i> <sub>1</sub> = 0.0450, <i>wR</i> <sub>2</sub> = 0.1008               | <i>R</i> <sub>1</sub> = 0.0591, <i>wR</i> <sub>2</sub> = 0.1454                                  |
| Largest diff. peak/hole / e Å <sup>-3</sup>                  | 1.83/-1.09                                                                    | 0.60/-0.98                                                                    | 2.82/-0.85                                                                                       |
| Flack parameter                                              | -                                                                             | -                                                                             | 0.035(7)                                                                                         |



**Table S2:** Crystal data and structure refinement for compounds **20**, **23** - **24**.

| Compound                                                     | <b>20</b>                                                                                           | <b>23</b>                                                                    | <b>24</b>                                                                     |
|--------------------------------------------------------------|-----------------------------------------------------------------------------------------------------|------------------------------------------------------------------------------|-------------------------------------------------------------------------------|
| Empirical formula                                            | C <sub>106.5</sub> H <sub>189</sub> Al <sub>2</sub> Au <sub>2</sub> N <sub>12</sub> Si <sub>4</sub> | C <sub>42</sub> H <sub>77</sub> AlCuN <sub>2</sub> PSi <sub>2</sub>          | C <sub>49</sub> H <sub>91</sub> AlCuN <sub>4</sub> PSi <sub>2</sub>           |
| Formula weight                                               | 2197.94                                                                                             | 787.72                                                                       | 913.92                                                                        |
| Crystal system                                               | monoclinic                                                                                          | monoclinic                                                                   | monoclinic                                                                    |
| Space group                                                  | <i>P2<sub>1</sub>/c</i>                                                                             | <i>P2<sub>1</sub>/n</i>                                                      | <i>P2<sub>1</sub>/n</i>                                                       |
| <i>a</i> /Å                                                  | 14.9232(1)                                                                                          | 12.4581(1)                                                                   | 20.4042(2)                                                                    |
| <i>b</i> /Å                                                  | 31.7335(1)                                                                                          | 16.1906(1)                                                                   | 12.8489(1)                                                                    |
| <i>c</i> /Å                                                  | 26.0764(1)                                                                                          | 23.0546(1)                                                                   | 21.4769(2)                                                                    |
| <i>α</i> /°                                                  | 90                                                                                                  | 90                                                                           | 90                                                                            |
| <i>β</i> /°                                                  | 91.103(1)                                                                                           | 96.251(1)                                                                    | 106.300(1)                                                                    |
| <i>γ</i> /°                                                  | 90                                                                                                  | 90                                                                           | 90                                                                            |
| Volume/Å <sup>3</sup>                                        | 12346.6(1)                                                                                          | 4622.56(5)                                                                   | 5404.31(9)                                                                    |
| <i>Z</i>                                                     | 4                                                                                                   | 4                                                                            | 4                                                                             |
| $\rho_{\text{calc}}$ g/cm <sup>3</sup>                       | 1.182                                                                                               | 1.132                                                                        | 1.123                                                                         |
| $\mu$ /mm <sup>-1</sup>                                      | 5.245                                                                                               | 1.876                                                                        | 1.678                                                                         |
| <i>F</i> (000)                                               | 4608.0                                                                                              | 1712.0                                                                       | 1992.0                                                                        |
| Crystal size/mm <sup>3</sup>                                 | 0.106 × 0.068 × 0.047                                                                               | 0.209 × 0.191 × 0.158                                                        | 0.358 × 0.277 × 0.253                                                         |
| 2 $\theta$ range /°                                          | 7.32 to 147.01                                                                                      | 7.716 to 146.316                                                             | 7.044 to 144.248                                                              |
| Index ranges                                                 | -17 ≤ <i>h</i> ≤ 18, -39 ≤ <i>k</i> ≤ 35, -31 ≤ <i>l</i> ≤ 32                                       | -15 ≤ <i>h</i> ≤ 11, -19 ≤ <i>k</i> ≤ 19, -28 ≤ <i>l</i> ≤ 28                | -25 ≤ <i>h</i> ≤ 24, -12 ≤ <i>k</i> ≤ 15, -26 ≤ <i>l</i> ≤ 26                 |
| Reflections collected                                        | 172051                                                                                              | 58911                                                                        | 71855                                                                         |
| Independent reflections                                      | 24603 [ <i>R</i> <sub>int</sub> = 0.0529, <i>R</i> <sub>sigma</sub> = 0.0320]                       | 9195 [ <i>R</i> <sub>int</sub> = 0.0272, <i>R</i> <sub>sigma</sub> = 0.0176] | 10645 [ <i>R</i> <sub>int</sub> = 0.0485, <i>R</i> <sub>sigma</sub> = 0.0307] |
| Data/restraints/parameters                                   | 24603/8/1118                                                                                        | 9195/0/463                                                                   | 10645/126/665                                                                 |
| Goodness-of-fit on <i>F</i> <sup>2</sup>                     | 1.026                                                                                               | 1.018                                                                        | 1.021                                                                         |
| Final <i>R</i> indexes [ <i>I</i> ≥ 2 $\sigma$ ( <i>I</i> )] | <i>R</i> <sub>1</sub> = 0.0318, <i>wR</i> <sub>2</sub> = 0.0809                                     | <i>R</i> <sub>1</sub> = 0.0271, <i>wR</i> <sub>2</sub> = 0.0712              | <i>R</i> <sub>1</sub> = 0.0391, <i>wR</i> <sub>2</sub> = 0.1043               |
| Final <i>R</i> indexes [all data]                            | <i>R</i> <sub>1</sub> = 0.0362, <i>wR</i> <sub>2</sub> = 0.0837                                     | <i>R</i> <sub>1</sub> = 0.0286, <i>wR</i> <sub>2</sub> = 0.0724              | <i>R</i> <sub>1</sub> = 0.0418, <i>wR</i> <sub>2</sub> = 0.1068               |
| Largest diff. peak/hole / e Å <sup>-3</sup>                  | 0.97/-1.21                                                                                          | 0.32/-0.28                                                                   | 0.48/-0.59                                                                    |

## Computational Details

DFT calculations were run with Gaussian 09 (D.01).<sup>8</sup> The Cu, Ag, Au, Al, Si and P centres were described with the Stuttgart RECPs and associated basis sets,<sup>9</sup> and the 6-31G\*\* basis set was used for all other atoms (BS1).<sup>10, 11</sup> A polarization function was also added to Al ( $\zeta_d = 0.190$ ), Si ( $\zeta_d = 0.284$ ) and P ( $\zeta_d = 0.387$ ).<sup>12</sup> Initial BP86 optimizations<sup>13, 14</sup> were performed using the ‘grid = ultrafine’ option, with all stationary points being fully characterized via analytical frequency calculations as minima or transition states (all positive eigenvalues or one imaginary eigenvalue respectively). All energies were recomputed with a larger basis set featuring 6-311++G\*\* basis sets on all atoms except Cu, Ag and Au, for which cc-pVTZ-pp (BS2) was employed. Corrections for the effect of benzene ( $\epsilon = 2.2706$ ) solvent were employed using the polarizable continuum model and BS1.<sup>15</sup> Single-point dispersion corrections to the BP86 results employed Grimme’s D3 parameter set with Becke-Johnson damping as implemented in Gaussian.<sup>16</sup>

The Quantum Theory of Atoms in Molecules (QTAIM, AIMALL program)<sup>17</sup> and Natural Bonding Orbital (NBO7)<sup>18</sup> analyses were performed on the BP86-optimised geometries **7**, **16**, **17**, **8**, **23** and **4-Cu**. The QTAIM topological analyses used wavefunction files obtained with Gaussian 16 (C.01)<sup>19</sup> at the BP86/BS2 level, whilst NBO analyses were carried out with NBO 7 within Gaussian 16 (C.01) at the same methodology level as the QTAIM calculations. Contour plots were generated in the AIMStudio package, using critical point (CP) visualisation threshold values of  $0.025 e \text{ bohr}^{-3}$  (solid line BCP = strong) and  $0.02 e \text{ bohr}^{-3}$  (dashed line BCP = weak).

Functional testing of the energetics of CO extrusion were carried out with Gaussian 09 (D.01) at the DFA,C<sub>6</sub>H<sub>6</sub>/BS2//BP86/BS1 level, with B3LYP-D3BJ,<sup>20, 21</sup> M06,<sup>22</sup> PBE-D3BJ,<sup>23</sup> PBE0-D3BJ,<sup>24, 25</sup> TPSS-D3J and  $\omega$ B97X-D.<sup>26</sup>

## Breakdown of Energy Contributions

The following tables detail the evolution of the relative energies as the successive corrections to the initial SCF energy are included. Terms used are:

|                                                |                                                                                   |
|------------------------------------------------|-----------------------------------------------------------------------------------|
| $\Delta E_{\text{BS1}}$                        | SCF energy computed with the BP86 functional with BS1                             |
| $\Delta H_{\text{BS1}}$                        | Enthalpy at 0 K with BS1                                                          |
| $\Delta G_{\text{BS1}}$                        | Free energy at 298.15 K and 1 atm with BS1                                        |
| $\Delta G_{\text{BS1}/\text{bnz}}$             | Free energy corrected for benzene solvent with BS1                                |
| $\Delta G_{\text{BS1}/\text{bnz}+\text{D3BJ}}$ | Free energy corrected for benzene and dispersion effects with BS1                 |
| $\Delta E_{\text{BS2}}$                        | SCF energy computed with the BP86 functional with BS2                             |
| $\Delta G_{\text{bnz}}$                        | Free energy corrected for basis set (BS2), dispersion effects and benzene solvent |

**Table S3.** Energies breakdown table (kcal/mol) of all stationary points in the free energy profiles in Figures 5 and S56, relative to the reactant L-M-Al complex ( $I_{Cu}$ ,  $I_{Ag}$ ,  $I_{Au}$ ,  $I_{P,H}$  and  $I_{P,A}$ ). In each case the final data used in the main article are highlighted in bold.

|                                  | $\Delta E_{BSI}$ | $\Delta H_{BSI}$ | $\Delta G_{BSI}$ | $\Delta G_{BSI/bnz}$ | $\Delta G_{BSI/bnz+D3BJ}$ | $\Delta E_{BS2}$ | $\Delta G_{bnz}$ |
|----------------------------------|------------------|------------------|------------------|----------------------|---------------------------|------------------|------------------|
| $I_{Cu}$                         | 0.0              | 0.0              | 0.0              | 0.0                  | 0.0                       | 0.0              | <b>0.0</b>       |
| <b>TS(I-II)<sub>Cu</sub></b>     | 7.3              | 6.7              | 8.6              | 8.7                  | 8.6                       | 7.2              | <b>8.5</b>       |
| $II_{Cu}$                        | 0.1              | 0.2              | -0.8             | -0.7                 | 1.7                       | -0.1             | <b>1.5</b>       |
| <b>TS(II-III)<sub>Cu</sub></b>   | 7.9              | 8.3              | 20.2             | 20.9                 | 10.9                      | 11.8             | <b>14.8</b>      |
| $III_{Cu}$                       | -13.3            | -11.9            | 1.9              | 1.6                  | -9.1                      | -8.3             | <b>-4.2</b>      |
| <b>TS(III-IV)<sub>Cu</sub></b>   | -1.4             | -1.1             | 11.8             | 11.2                 | 8.1                       | 4.6              | <b>14.1</b>      |
| $IV_{Cu}$                        | -11.2            | -10.2            | 0.3              | -1.6                 | 2.4                       | -6.9             | <b>6.7</b>       |
| <b>TS(IV-A)<sub>Cu</sub></b>     | -7.9             | -7.6             | 2.3              | 0.1                  | 7.5                       | -4.6             | <b>10.8</b>      |
| $A_{Cu}$                         | -15.5            | -14.5            | -4.5             | -5.6                 | -0.7                      | -11.2            | <b>3.6</b>       |
| <b>TS(III-S)<sub>Cu</sub></b>    | -9.4             | -8.8             | 4.9              | 3.8                  | 0.4                       | -5.3             | <b>4.5</b>       |
| $S_{Cu}$                         | -40.0            | -38.7            | -28.9            | -30.5                | -23.4                     | -35.9            | <b>-19.3</b>     |
| <b>TS(S-E)<sub>Cu</sub></b>      | -0.8             | -1.0             | 10.0             | 9.7                  | 8.2                       | 0.1              | <b>9.1</b>       |
| $E_{Cu}$                         | -12.5            | -12.0            | -2.6             | -2.1                 | -7.0                      | -13.5            | <b>-7.9</b>      |
| $III_{Cu,N}$                     | -3.0             | -1.1             | 21.6             | 23.1                 | -10.4                     | 0.1              | <b>-7.3</b>      |
| <b>TS(III-IV)<sub>Cu,N</sub></b> | -0.1             | 1.1              | 23.9             | 25.4                 | -5.2                      | 2.9              | <b>-2.2</b>      |
| $IV_{Cu,N}$                      | -11.0            | -9.3             | 10.5             | 11.3                 | -12.6                     | -8.5             | <b>-10.1</b>     |
| <b>TS(IV-A)<sub>Cu,N</sub></b>   | 9.1              | 9.8              | 29.4             | 29.7                 | 8.9                       | 11.3             | <b>11.1</b>      |
| <b>INT(IV-A)<sub>Cu,N</sub></b>  | -16.0            | -14.5            | 4.3              | 4.1                  | -16.8                     | -14.2            | <b>-14.9</b>     |
| <b>TS_A_S<sub>Cu,N</sub></b>     | 37.6             | 37.3             | 54.2             | 55.0                 | 32.3                      | 38.6             | <b>33.3</b>      |
| $A_{Cu,N}$                       | -23.3            | -22.0            | -5.3             | -5.4                 | -25.6                     | -21.7            | <b>-24.0</b>     |
| $S_{Cu,N}$                       | -36.4            | -34.9            | -16.9            | -16.8                | -42.3                     | -34.1            | <b>-40.0</b>     |
| $I_{P,H}$                        | 0.0              | 0.0              | 0.0              | 0.0                  | 0.0                       | 0.0              | <b>0.0</b>       |
| <b>TS(I-II)<sub>P,H</sub></b>    | 7.4              | 7.4              | 20.1             | 20.7                 | 7.5                       | 12.0             | <b>12.1</b>      |
| $III_{P,H}$                      | -12.4            | -11.6            | 2.3              | 1.9                  | -9.6                      | -7.4             | <b>-4.6</b>      |
| $S_{P,H}$                        | -40.0            | -39.3            | -28.8            | -30.3                | -26.4                     | -36.1            | <b>-22.5</b>     |
| <b>TS(S-E)<sub>P,H</sub></b>     | -4.1             | -5.0             | 5.6              | 5.3                  | 1.2                       | -3.4             | <b>1.9</b>       |
| $E_{P,H}$                        | -18.9            | -19.0            | -10.1            | -9.6                 | -18.0                     | -19.5            | <b>-18.6</b>     |
| $I_{P,A}$                        | 0.0              | 0.0              | 0.0              | 0.0                  | 0.0                       | 0.0              | <b>0.0</b>       |
| <b>TS(I-II)<sub>P,A</sub></b>    | 3.3              | 3.4              | 14.6             | 15.2                 | 2.4                       | 7.3              | <b>6.4</b>       |
| $II_{P,A}$                       | -18.3            | -17.1            | -3.8             | -4.4                 | -15.9                     | -13.3            | <b>-10.9</b>     |
| $S_{P,A}$                        | -43.9            | -43.0            | -32.9            | -34.7                | -29.9                     | -39.9            | <b>-25.9</b>     |
| <b>TS(S-E)<sub>P,A</sub></b>     | -7.2             | -7.9             | 2.0              | 1.8                  | -1.5                      | -7.0             | <b>-1.3</b>      |
| $E_{P,A}$                        | -19.7            | -19.6            | -9.3             | -9.0                 | -15.0                     | -21.3            | <b>-16.6</b>     |
| $I_{Ag}$                         | 0.0              | 0.0              | 0.0              | 0.0                  | 0.0                       | 0.0              | <b>0.0</b>       |
| <b>TS(I-II)<sub>Ag</sub></b>     | 8.5              | 7.9              | 9.9              | 9.9                  | 10.1                      | 8.2              | <b>9.9</b>       |
| $II_{Ag}$                        | 0.2              | 0.3              | -0.5             | -0.5                 | 1.7                       | 0.0              | <b>1.6</b>       |
| <b>TS(II-III)<sub>Ag</sub></b>   | 9.1              | 9.5              | 21.2             | 21.8                 | 11.3                      | 13.5             | <b>15.7</b>      |
| $III_{Ag}$                       | -5.4             | -4.2             | 9.8              | 9.1                  | -2.6                      | 0.3              | <b>3.1</b>       |
| <b>TS(III-IV)<sub>Ag</sub></b>   | 9.0              | 9.2              | 22.6             | 21.0                 | 17.1                      | 15.1             | <b>23.2</b>      |
| $IV_{Ag}$                        | 0.2              | 1.1              | 11.5             | 8.8                  | 10.8                      | 4.9              | <b>15.5</b>      |
| $A_{Ag}$                         | -5.8             | -4.8             | 5.0              | 3.2                  | 7.4                       | -1.1             | <b>12.1</b>      |
| <b>TS(III-S)<sub>Ag</sub></b>    | -1.5             | -1.1             | 12.5             | 11.0                 | 6.5                       | 3.1              | <b>11.1</b>      |
| $S_{Ag}$                         | -32.0            | -30.8            | -20.5            | -22.4                | -16.5                     | -26.9            | <b>-11.4</b>     |
| $III_{Ag,N}$                     | 7.9              | 9.6              | 31.8             | 33.1                 | -1.3                      | 11.8             | <b>2.6</b>       |

|                                  |       |       |       |       |       |       |              |
|----------------------------------|-------|-------|-------|-------|-------|-------|--------------|
| <b>TS(III-IV)<sub>Ag,N</sub></b> | 13.0  | 13.9  | 35.9  | 37.2  | 6.1   | 16.8  | <b>9.9</b>   |
| <b>IV<sub>Ag,N</sub></b>         | -0.7  | 0.9   | 21.4  | 21.8  | -2.7  | 2.1   | <b>0.2</b>   |
| <b>A<sub>Ag,N</sub></b>          | -12.3 | -11.0 | 5.9   | 5.4   | -15.4 | -10.5 | <b>-13.6</b> |
| <b>S<sub>Ag,N</sub></b>          | -28.9 | -27.2 | -7.6  | -7.7  | -33.9 | -26.6 | <b>-31.6</b> |
| <b>I<sub>Au</sub></b>            | 0.0   | 0.0   | 0.0   | 0.0   | 0.0   | 0.0   | <b>0.0</b>   |
| <b>TS(I-II)<sub>Au</sub></b>     | 9.2   | 8.6   | 10.1  | 10.1  | 10.6  | 8.8   | <b>10.2</b>  |
| <b>II<sub>Au</sub></b>           | 0.0   | 0.1   | -0.9  | -0.9  | 1.4   | -0.2  | <b>1.1</b>   |
| <b>TS(II-III)<sub>Au</sub></b>   | 9.3   | 9.7   | 21.1  | 21.7  | 11.3  | 14.0  | <b>15.9</b>  |
| <b>III<sub>Au</sub></b>          | -4.8  | -3.6  | 10.0  | 9.1   | -2.7  | 0.1   | <b>2.3</b>   |
| <b>TS(III-IV)<sub>Au</sub></b>   | 23.5  | 23.7  | 36.9  | 35.8  | 31.3  | 28.9  | <b>36.8</b>  |
| <b>IV<sub>Au</sub></b>           | 9.1   | 10.1  | 20.9  | 18.8  | 22.3  | 12.9  | <b>26.0</b>  |
| <b>A<sub>Au</sub></b>            | 3.9   | 4.9   | 14.1  | 12.4  | 19.1  | 7.6   | <b>22.8</b>  |
| <b>TS(III-S)<sub>Au</sub></b>    | -1.8  | -1.2  | 12.7  | 11.2  | 5.8   | 2.6   | <b>10.2</b>  |
| <b>S<sub>Au</sub></b>            | -32.1 | -30.8 | -20.8 | -22.4 | -15.3 | -27.6 | <b>-10.8</b> |
| <b>III<sub>Au,N</sub></b>        | 9.4   | 11.2  | 32.9  | 34.1  | -0.6  | 12.5  | <b>2.5</b>   |
| <b>TS(III-IV)<sub>Au,N</sub></b> | 26.2  | 27.2  | 48.8  | 50.2  | 19.2  | 28.8  | <b>21.8</b>  |
| <b>IV<sub>Au,N</sub></b>         | 4.6   | 6.3   | 26.7  | 27.4  | 3.7   | 6.6   | <b>5.7</b>   |
| <b>A<sub>Au,N</sub></b>          | -6.8  | -5.4  | 11.7  | 11.4  | -8.5  | -5.8  | <b>-7.5</b>  |
| <b>S<sub>Au,N</sub></b>          | -28.1 | -26.3 | -6.6  | -6.6  | -34.3 | -25.9 | <b>-32.1</b> |

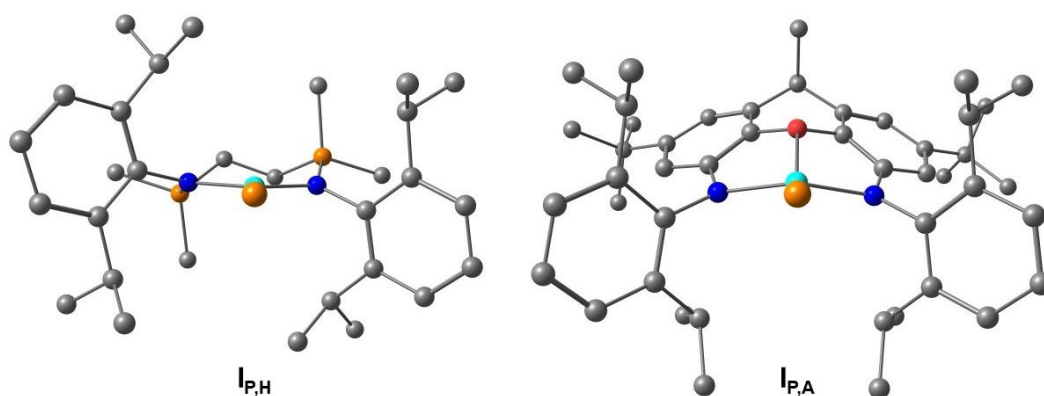

**Figure S55.** Comparison of the optimised structures of **I<sub>P,H</sub>** (**23**) and **I<sub>P,A</sub>** (**4-Cu**). All hydrogen atoms and atoms part of the *t*-Bu<sub>3</sub>P ligand have been omitted for clarity.

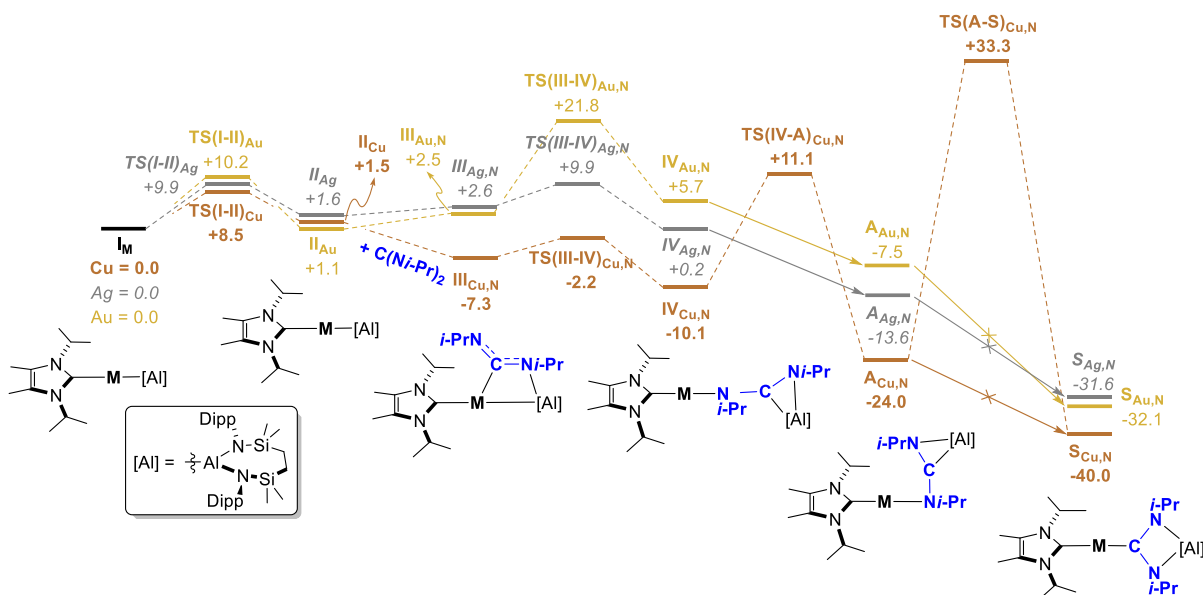

**Figure S56.** Computed free energy profile (in kcal mol<sup>-1</sup>) of addition and activation of *i*-PrN=C=Ni-Pr to form asymmetric group 11 metal alumanyl adducts "A<sub>M,N</sub>", where M = Cu (copper brown, bold), Ag (silver, italics) and Au (gold), whereby three separate energy profiles are presented for each coinage metal complex.

### Discussion of I<sub>Cu</sub> profile

From **II<sub>Cu</sub>** (+1.5 kcal/mol) addition of *i*-PrN=C=Ni-Pr takes place exergonically to form **III<sub>Cu,N</sub>** (-7.3 kcal/mol). Note that in the other two complexes (**I<sub>Ag</sub>**, **I<sub>Au</sub>**) this process is marginally endergonic (where **III<sub>Ag,N</sub>** = +2.6 kcal/mol, **III<sub>Au,N</sub>** = +2.5 kcal/mol). From **III<sub>Cu,N</sub>** Cu–Al bond cleavage can readily take place via **TS(III-IV)<sub>Cu,N</sub>** and a barrier of +5.1 kcal/mol to form the asymmetric adduct **IV<sub>Cu,N</sub>** (-10.1 kcal/mol), and subsequent rate-limiting conformational rearrangement via **TS(IV-A)<sub>Cu,N</sub>** can ultimately yield **A<sub>Cu,N</sub>** (-24.0 kcal/mol). (*Note*: an intermediate species **INT(IV-A)<sub>Cu,N</sub>**, not shown in Figure S56 was optimised following IRC analysis of **TS(IV-A)<sub>Cu,N</sub>** at (-14.9 kcal/mol), but comparison of this intermediate with **A<sub>Cu,N</sub>** indicates that the barrier for arrangement of **INT(IV-A)<sub>Cu,N</sub>** to **A<sub>Cu,N</sub>** to be sufficiently small). Subsequent characterisation of an isomerisation process to form **S<sub>Cu,N</sub>** from **A<sub>Cu,N</sub>** identified that this process, via **TS(A-S)<sub>Cu,N</sub>** (+33.3 kcal/mol) is extremely high in energy and kinetically inaccessible, which is consistent with the experimental observation that upon formation of **A<sub>Cu,N</sub>**, it is not amenable to onwards reactivity in this fashion.

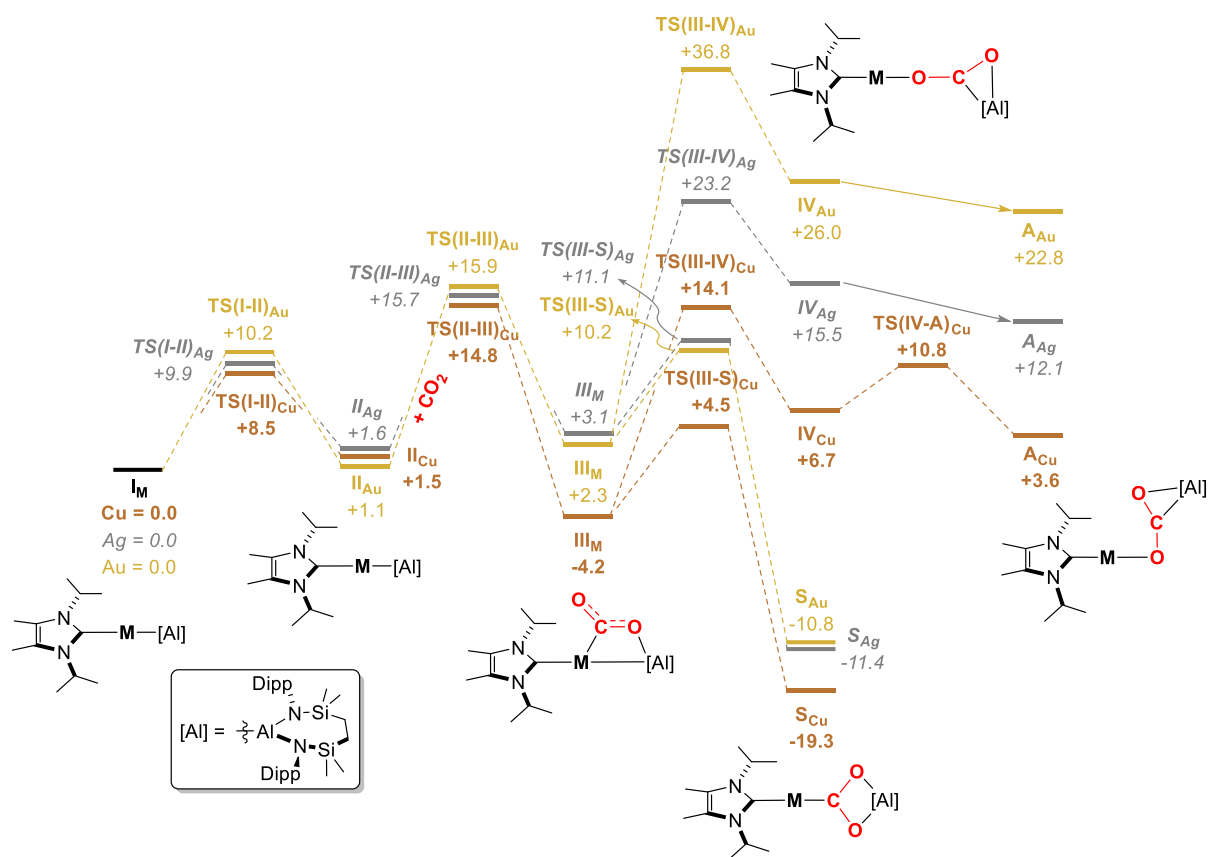

**Figure S57.** Computed free energy profile (in kcal mol<sup>-1</sup>) of addition and activation of CO<sub>2</sub> to form asymmetric group 11 metal alumanyl adducts "S<sub>M</sub>" and "A<sub>M</sub>", where M = Cu (copper brown, bold), Ag (silver, italics) and Au (gold), whereby three separate energy profiles are presented for each coinage metal complex.

## QTAIM contour plots & tabulated data

### Combined Data

Table S4. BCP data for 7, 16, 17, 8, 23 and 4-Cu.

| Complex | BCP         | $\rho(r)$ | $\nabla^2\rho(r)$ | $\epsilon$ | $G(r)$   | $V(r)$    | $H(r)$    | $DI(A B)$ |
|---------|-------------|-----------|-------------------|------------|----------|-----------|-----------|-----------|
| 7       | Cu1 - Al4   | 0.061284  | -0.04545          | 0.170355   | 0.019122 | -0.04961  | -0.03048  | 0.751638  |
|         | Cu1 - C89   | 0.105188  | 0.274515          | 0.060812   | 0.107578 | -0.14653  | -0.03895  | 0.734047  |
| 16      | Ag1 - Al4   | 0.059934  | -0.028136         | 0.161714   | 0.02156  | -0.050153 | -0.028594 | 0.719295  |
|         | Ag1 - C89   | 0.086395  | 0.214371          | 0.048192   | 0.078145 | -0.102725 | -0.02458  | 0.66521   |
| 17      | Au1 - Al4   | 0.066345  | 0.048872          | 0.133499   | 0.041654 | -0.07109  | -0.029436 | 0.618397  |
|         | Au1 - C89   | 0.104615  | 0.209146          | 0.054995   | 0.089063 | -0.125921 | -0.036858 | 0.798752  |
| 8       | Cu1 - Al4   | 0.058889  | -0.061269         | 0.143801   | 0.012991 | -0.041299 | -0.028308 | 0.761956  |
|         | Cu1 - C88   | 0.10646   | 0.271683          | 0.067283   | 0.108037 | -0.148154 | -0.040117 | 0.811884  |
| 23      | Cu1 - Al5   | 0.059877  | -0.04149          | 0.168807   | 0.019073 | -0.04852  | -0.029444 | 0.724994  |
|         | Cu1 - P2    | 0.072261  | 0.118634          | 0.007243   | 0.051507 | -0.07336  | -0.021848 | 0.687771  |
| 4-Cu    | Al2 - O3    | 0.03616   | 0.158888          | 0.295319   | 0.041933 | -0.044145 | -0.002211 | 0.134022  |
|         | Al2 - Cu154 | 0.059838  | -0.043735         | 0.189032   | 0.018657 | -0.048248 | -0.029591 | 0.723444  |
|         | P1 - Cu154  | 0.072499  | 0.119147          | 0.007212   | 0.051765 | -0.073742 | -0.021978 | 0.687923  |

**Table S5.** Selected QTAIM and NBO atomic data for **7**, **16**, **17**, **8**, **23** and **4-Cu**.

| <b>Complex</b> | <b>Atom</b> | <b>Vol(r)</b> | <b>Loc(r)</b> | <b>q(A)<sub>AIM</sub></b> | <b>q(A)<sub>NBO7</sub></b> |
|----------------|-------------|---------------|---------------|---------------------------|----------------------------|
| <b>7</b>       | Cu1         | 181.8075      | 93.50836      | -0.32294                  | 0.03823                    |
|                | Al4         | 84.03675      | 91.76677      | 1.817361                  | 1.40023                    |
|                | C89         | 71.95786      | 67.66834      | 0.621562                  | -0.01461                   |
| <b>16</b>      | Ag1         | 233.5177      | 93.72572      | -0.42795                  | 0.05719                    |
|                | Al4         | 79.29488      | 91.9187       | 1.874219                  | 1.35352                    |
|                | C89         | 72.72383      | 67.86935      | 0.66966                   | 0.02113                    |
| <b>17</b>      | Au1         | 256.123771    | 93.25664      | -0.71988                  | -0.13943                   |
|                | Al4         | 63.168608     | 92.60946      | 2.080411                  | 1.50958                    |
|                | C89         | 67.446312     | 66.71655      | 0.702368                  | 0.02579                    |
| <b>8</b>       | Cu1         | 191.3187      | 93.5677       | -0.21193                  | 0.12232                    |
|                | Al4         | 93.73914      | 91.63562      | 1.734758                  | 1.38051                    |
|                | C88         | 72.01144      | 68.22331      | 0.325452                  | 0.01333                    |
| <b>23</b>      | Cu1         | 209.43012     | 94.13948      | -0.40276                  | 0.00099                    |
|                | Al5         | 81.482699     | 91.83595      | 1.851329                  | 1.40033                    |
|                | P2          | 104.694774    | 85.84415      | 0.667465                  | 0.83863                    |
| <b>4-Cu</b>    | Cu154       | 210.7553      | 94.16081      | -0.4057                   | 0.11432                    |
|                | Al2         | 80.69499      | 92.08756      | 1.887043                  | 1.18243                    |
|                | O3          | 86.2118       | 85.69318      | -1.11682                  | -0.59587                   |
|                | P1          | 104.4814      | 85.83918      | 0.667953                  | 0.85494                    |



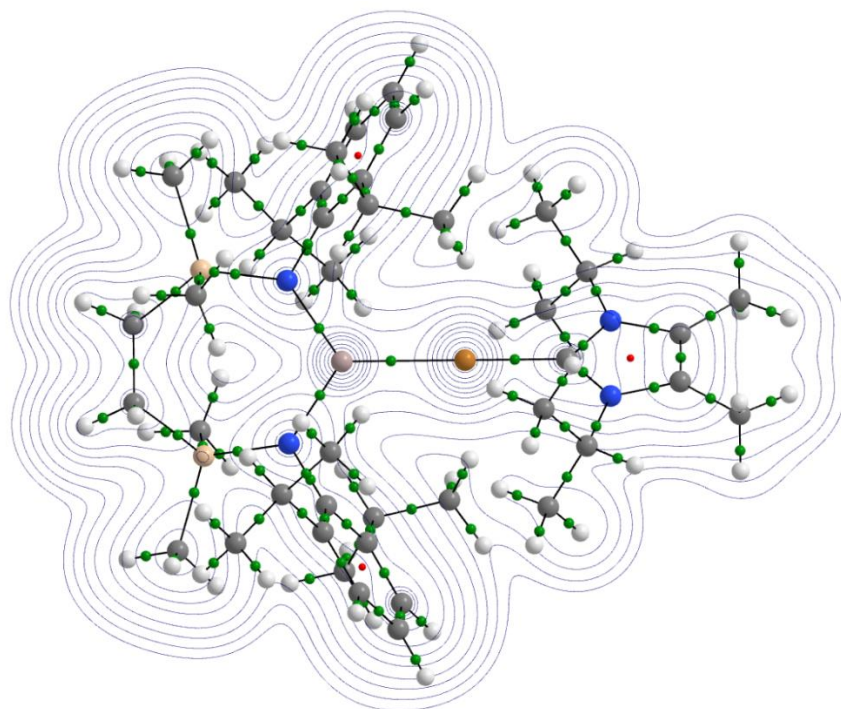

**Figure S58.** Contour plot of 7.

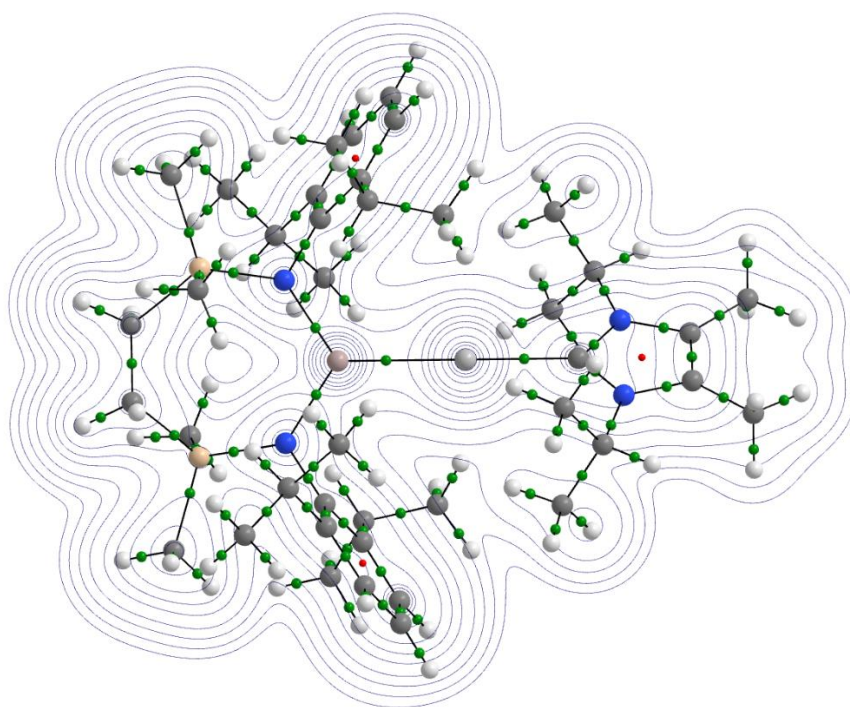

**Figure S59.** Contour plot of 16.

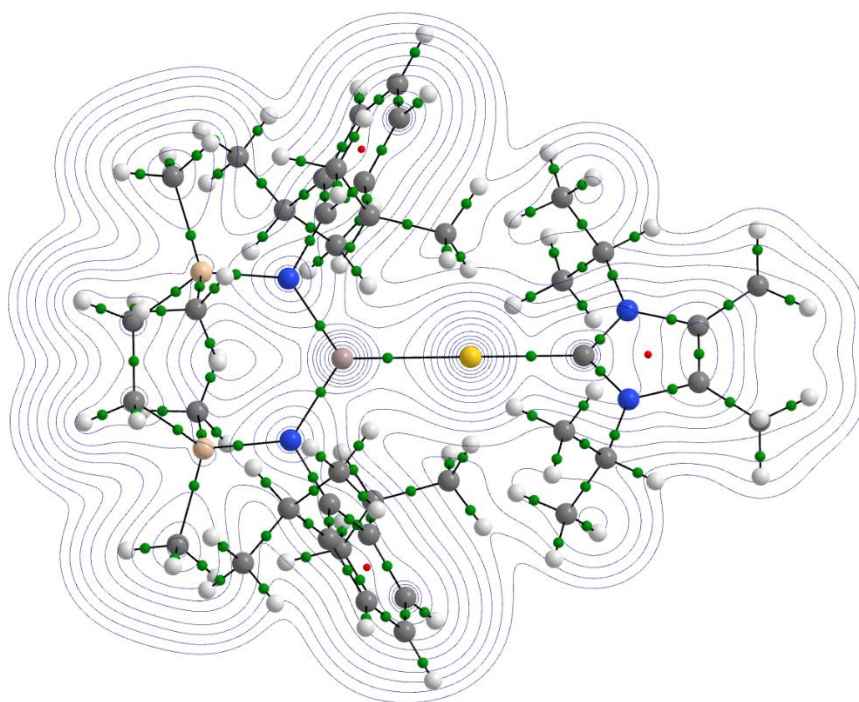

**Figure S60.** Contour plot of **17**.

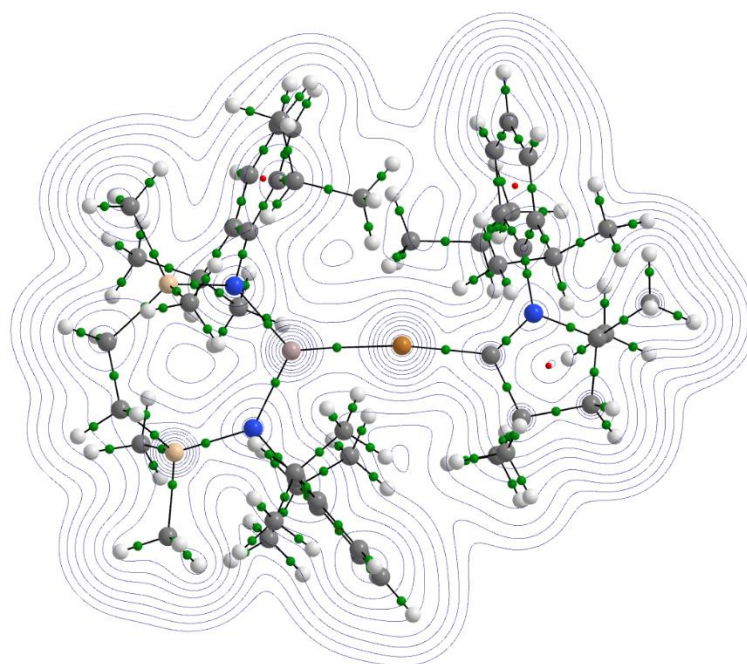

**Figure S61.** Contour plot of **8**.

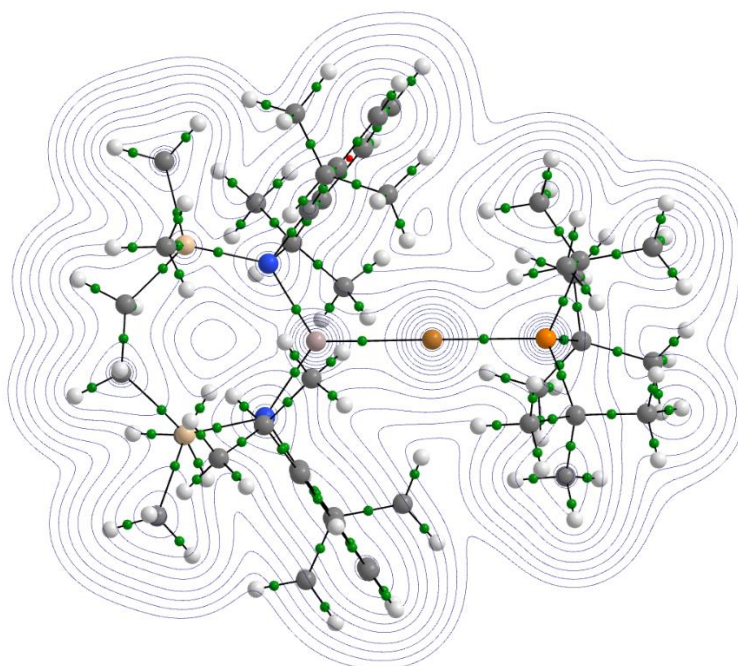

**Figure S62.** Contour plot of **23**.

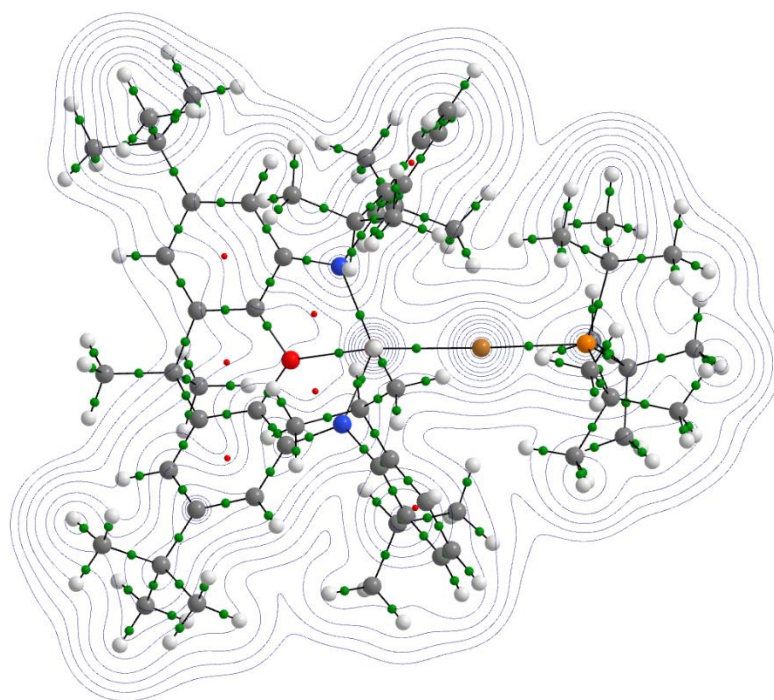

**Figure S63.** Contour plot of **4-Cu**.

## NBO data

**Table S6.** L-M-Al bonding NLMO compositions

| Complex | Atom | Contribution to M-Al NLMO in % ( <i>s</i> , <i>p</i> , <i>d</i> character) |                  |                  |                  |
|---------|------|----------------------------------------------------------------------------|------------------|------------------|------------------|
|         |      | <i>overall</i>                                                             | <i>s orbital</i> | <i>p orbital</i> | <i>d orbital</i> |
| 7       | Cu   | 45.49                                                                      | 94.74            | 0.81             | 4.45             |
|         | Al   | 51.00                                                                      | 88.15            | 11.77            | 0.08             |
| 16      | Ag   | 43.24                                                                      | 95.02            | 0.67             | 4.30             |
|         | Al   | 53.09                                                                      | 83.80            | 16.11            | 0.09             |
| 17      | Au   | 55.47                                                                      | 91.02            | 0.48             | 8.48             |
|         | Al   | 41.83                                                                      | 83.36            | 15.51            | 0.13             |
| 8       | Cu   | 42.72                                                                      | 94.72            | 0.92             | 4.35             |
|         | Al   | 53.17                                                                      | 88.58            | 11.35            | 0.07             |
| 23      | Cu   | 45.88                                                                      | 96.32            | 1.13             | 2.55             |
|         | Al   | 51.26                                                                      | 84.27            | 15.64            | 0.09             |
| 4-Cu    | Cu   | 39.93                                                                      | 96.49            | 0.75             | 2.76             |
|         | Al   | 57.73                                                                      | 75.05            | 25.85            | 0.10             |



## Functional testing of CO extrusion

**Table S7.** Computed single-point energies of CO extrusion intermediates (in Hartrees) for functional testing, computed at the DFA,C<sub>6</sub>H<sub>6</sub>/BS2//BP86/BS1 level.

|                              | B3LYP-D3BJ    | M06           | PBE-D3BJ      | PBE0-D3BJ     | TPSS-D3BJ     | wB97XD        |
|------------------------------|---------------|---------------|---------------|---------------|---------------|---------------|
| <b>S<sub>Cu</sub></b>        | -3032.1416000 | -3030.2661120 | -3028.8441563 | -3029.0740846 | -3032.3276633 | -3031.1726794 |
| <b>TS(S-E)<sub>Cu</sub></b>  | -3032.0907935 | -3030.2119610 | -3028.7943387 | -3029.0151039 | -3032.2806477 | -3031.1162654 |
| <b>E<sub>Cu</sub></b>        | -3032.1147104 | -3030.2343053 | -3028.8182445 | -3029.0383125 | -3032.3079802 | -3031.1415873 |
| <b>S<sub>P,H</sub></b>       | -3306.3426145 | -3304.4446490 | -3302.8907805 | -3303.1753041 | -3306.5107728 | -3305.3686093 |
| <b>TS(S-E)<sub>P,H</sub></b> | -3306.2965362 | -3304.3947216 | -3302.8454562 | -3303.1215560 | -3306.4686713 | -3305.3171757 |
| <b>E<sub>P,H</sub></b>       | -3306.3255973 | -3304.4227393 | -3302.8740111 | -3303.1485807 | -3306.5000847 | -3305.3465865 |
| <b>S<sub>P,A</sub></b>       | -3457.7310962 | -3455.2900036 | -3453.6819892 | -3453.9680998 | -3458.0154536 | -3456.5006396 |
| <b>TS(S-E)<sub>P,A</sub></b> | -3457.6853587 | -3455.2377642 | -3453.6360840 | -3453.9145483 | -3457.9731106 | -3456.4494710 |
| <b>E<sub>P,A</sub></b>       | -3457.7089940 | -3455.2595342 | -3453.6601092 | -3453.9357016 | -3457.9990674 | -3456.4726795 |

**Table S8.** Computed free energies (kcal/mol) of CO extrusion intermediates (relative to S<sub>L,AlI</sub>) for functional testing, computed at the DFA,C<sub>6</sub>H<sub>6</sub>/BS2//BP86/BS1 level. In bold are the kinetically favoured system for CO extrusion between S<sub>P,H</sub> and S<sub>P,A</sub>.

|                              | B3LYP-D3BJ   | M06          | PBE-D3BJ     | PBE0-D3BJ    | TPSS-D3BJ    | wB97XD       |
|------------------------------|--------------|--------------|--------------|--------------|--------------|--------------|
| <b>S<sub>Cu</sub></b>        | 0.0          | 0.0          | 0.0          | 0.0          | 0.0          | 0.0          |
| <b>TS(S-E)<sub>Cu</sub></b>  | +31.6        | +33.7        | +31.0        | +36.7        | +29.2        | +35.1        |
| <b>E<sub>Cu</sub></b>        | +15.7        | +18.8        | +15.1        | +21.3        | +11.2        | +18.4        |
| <b>S<sub>P,H</sub></b>       | 0.0          | 0.0          | 0.0          | 0.0          | 0.0          | 0.0          |
| <b>TS(S-E)<sub>P,H</sub></b> | +27.3        | <b>+29.7</b> | <b>+26.8</b> | +32.1        | +24.8        | +30.7        |
| <b>E<sub>P,H</sub></b>       | +8.3         | +11.3        | +8.1         | +14.3        | +4.3         | +11.4        |
| <b>S<sub>P,A</sub></b>       | 0.0          | 0.0          | 0.0          | 0.0          | 0.0          | 0.0          |
| <b>TS(S-E)<sub>P,A</sub></b> | <b>+26.9</b> | +31.0        | +27.0        | <b>+31.8</b> | <b>+24.8</b> | <b>+30.3</b> |
| <b>E<sub>P,A</sub></b>       | +13.3        | +18.5        | +13.1        | +19.7        | +9.7         | +16.9        |

# Cartesian Coordinates and Energies

## **i-PrNCNi-Pr**

SCF (BP86) Energy = -384.663990790  
Enthalpy 0K = -384.454365  
Enthalpy 298K = -384.453420  
Free Energy 298K = -384.504973  
Lowest Frequency = 23.8218 cm<sup>-1</sup>  
Second Frequency = 27.2199 cm<sup>-1</sup>  
SCF (BP86-D3BJ) Energy = -384.692047877  
SCF (C6H6) Energy = -384.665684967  
SCF (BS2) Energy = -384.763019620

C 0.00004 -0.43121 -0.00060  
N 1.18320 -0.53258 0.34928  
N -1.18311 -0.53175 -0.35072  
C 2.94494 1.06614 0.93987  
H 3.81509 1.63448 0.56922  
H 2.21420 1.78001 1.35415  
H 3.28031 0.40569 1.75737  
C 3.33349 -0.75316 -0.79827  
H 2.87718 -1.33277 -1.61703  
H 4.20843 -0.21284 -1.19856  
H 3.68147 -1.46215 -0.02808  
C -2.94691 1.06516 -0.93975  
H -3.81702 1.63301 -0.56825  
H -2.21727 1.77939 -1.35535  
H -3.28283 0.40403 -1.75647  
C 2.32320 0.23544 -0.19421  
H 1.97527 0.92226 -0.99222  
C -2.32304 0.23553 0.19394  
H -1.97466 0.92302 0.99117  
C -3.33174 -0.75361 0.79978  
H -2.87393 -1.33240 1.61829  
H -4.20664 -0.21382 1.20086  
H -3.68008 -1.46330 0.03040

## **CO<sub>2</sub>**

SCF (BP86) Energy = -188.586707744  
Enthalpy 0K = -188.572827  
Enthalpy 298K = -188.571883  
Free Energy 298K = -188.596251  
Lowest Frequency = 616.1687 cm<sup>-1</sup>  
Second Frequency = 616.1687 cm<sup>-1</sup>  
SCF (BP86-D3BJ) Energy = -188.588114567  
SCF (C6H6) Energy = -188.587597052  
SCF (BS2) Energy = -188.654543408

C 0.00000 0.00000 0.00000  
O 0.00000 0.00000 1.18174  
O 0.00000 0.00000 -1.18174

## **I<sub>Cu</sub>**

SCF (BP86) Energy = -2031.04455884  
Enthalpy 0K = -2029.975499  
Enthalpy 298K = -2029.974554  
Free Energy 298K = -2030.140763  
Lowest Frequency = 15.1376 cm<sup>-1</sup>  
Second Frequency = 22.0369 cm<sup>-1</sup>  
SCF (BP86-D3BJ) Energy = -2031.36231088  
SCF (C6H6) Energy = -2031.04865160  
SCF (BS2) Energy = -2843.16767231

Cu -1.54060 -0.00147 0.00124  
Si 3.53486 1.66071 -1.05141  
Si 3.53763 -1.65639 1.05041  
Al 0.84199 0.00031 0.00018  
N 1.88145 1.53821 -0.35909  
N 1.88377 -1.53620 0.35879

N -4.35625 -0.83633 -0.68704  
N -4.35724 0.83114 0.68863  
C 1.16842 2.78268 -0.19774  
C 0.40241 3.34893 -1.26742  
C -0.26336 4.57532 -1.06738  
H -0.84055 5.00682 -1.89418  
C -0.20275 5.25432 0.15441  
H -0.72110 6.21068 0.28539  
C 0.53450 4.69578 1.20574  
H 0.58561 5.22235 2.16590  
C 1.22452 3.47826 1.05366  
C 0.27720 2.67011 -2.63250  
H 0.85909 1.73406 -2.58129  
C -1.18630 2.28891 -2.94652  
H -1.59277 1.62444 -2.16143  
H -1.25248 1.76114 -3.91514  
H -1.83438 3.18206 -3.00603  
C 0.86406 3.53768 -3.76915  
H 0.31024 4.48739 -3.87818  
H 0.80377 3.00581 -4.73568  
H 1.92168 3.79093 -3.58481  
C 2.00331 2.90916 2.23972  
H 2.65849 2.11904 1.83321  
C 1.04435 2.23934 3.25041  
H 0.33568 2.97782 3.66705  
H 1.60132 1.78813 4.09129  
H 0.44965 1.44431 2.76491  
C 2.89754 3.95058 2.94458  
H 3.57870 4.44775 2.23326  
H 3.51169 3.46385 3.72262  
H 2.30464 4.73755 3.44409  
C 4.05766 3.49146 -1.14487  
H 3.33079 4.10589 -1.69993  
H 5.03462 3.57234 -1.65315  
H 4.16165 3.93257 -0.13930  
C 3.62221 0.91437 -2.80835  
H 3.22323 -0.11361 -2.83363  
H 4.66988 0.87532 -3.15715  
H 3.04879 1.51514 -3.53331  
C 4.86591 0.77550 -0.00177  
H 5.82673 1.15008 -0.41349  
H 4.82304 1.16834 1.03209  
C 4.86705 -0.76926 0.00029  
H 5.82855 -1.14241 0.41173  
H 4.82445 -1.16218 -1.03355  
C 3.62453 -0.91000 2.80735  
H 3.22380 0.11730 2.83288  
H 4.67222 -0.86923 3.15585  
H 3.05233 -1.51181 3.53243  
C 4.06301 -3.48641 1.14372  
H 3.33785 -4.10150 1.70030  
H 5.04090 -3.56577 1.65045  
H 4.16589 -3.92792 0.13822  
C 1.17246 -2.78165 0.19753  
C 0.40768 -3.34914 1.26744  
C -0.25648 -4.57641 1.06747  
H -0.83273 -5.00885 1.89444  
C -0.19544 -5.25512 -0.15446  
H -0.71252 -6.21217 -0.28538  
C 0.54060 -4.69538 -1.20601  
H 0.59206 -5.22172 -2.16628  
C 1.22898 -3.47693 -1.05400  
C 0.28208 -2.67069 2.63267  
H 0.86280 -1.73392 2.58141  
C -1.18179 -2.29131 2.94716  
H -1.58928 -1.62720 2.16229  
H -1.24833 -1.76376 3.91588  
H -1.82877 -3.18524 3.00672  
C 0.87032 -3.53772 3.76901  
H 0.31776 -4.48817 3.87797  
H 0.80959 -3.00612 4.73566  
H 1.92823 -3.78956 3.58436

C 2.00647 -2.90652 -2.24029  
H 2.66075 -2.11559 -1.83388  
C 1.04613 -2.23779 -3.25039  
H 0.33830 -2.97716 -3.66687  
H 1.60209 -1.78563 -4.09143  
H 0.45053 -1.44370 -2.76446  
C 2.90181 -3.94655 -2.94577  
H 3.58403 -4.44288 -2.23489  
H 3.51489 -3.45881 -3.72402  
H 2.30978 -4.73426 -3.44515  
C -3.50887 -0.00252 0.00133  
C -3.89494 -1.93352 -1.57951  
H -4.81943 -2.38603 -1.97675  
C -3.08126 -1.37386 -2.75569  
H -3.65015 -0.60939 -3.31029  
H -2.81764 -2.18975 -3.44898  
H -2.14468 -0.91615 -2.38945  
C -3.12681 -2.99824 -0.78422  
H -2.19190 -2.58191 -0.36969  
H -2.85538 -3.83973 -1.44191  
H -3.73363 -3.38761 0.04992  
C -5.70228 -0.53458 -0.43888  
C -6.85209 -1.27482 -1.04863  
H -6.85455 -1.21146 -2.15179  
H -7.80330 -0.84723 -0.69565  
H -6.85368 -2.34565 -0.77624  
C -5.70291 0.52960 0.43827  
C -6.85359 1.26975 1.04652  
H -6.85794 1.20571 2.14963  
H -7.80430 0.84261 0.69165  
H -6.85445 2.34074 0.77477  
C -3.89719 1.92874 1.58124  
H -4.82216 2.37898 1.97995  
C -3.13232 2.99554 0.78553  
H -2.19707 2.58136 0.36968  
H -2.86188 3.83731 1.44327  
H -3.74102 3.38402 -0.04767  
C -3.08085 1.37025 2.75610  
H -3.64737 0.60421 3.31095  
H -2.81825 2.18639 3.44947  
H -2.14365 0.91483 2.38856

**TS (I-II)<sub>Cu</sub>**

SCF (BP86) Energy = -2031.03293630  
Enthalpy 0K = -2029.964878  
Enthalpy 298K = -2029.963933  
Free Energy 298K = -2030.127085  
Lowest Frequency = -60.8913 cm<sup>-1</sup>  
Second Frequency = 15.4374 cm<sup>-1</sup>  
SCF (BP86-D3BJ) Energy = -2031.35080856  
SCF (C6H6) Energy = -2031.03687790  
SCF (BS2) Energy = -2843.15626333

Cu 1.40889 -0.48014 -0.18763  
Si -2.83992 2.46784 1.34578  
Si -4.02913 -0.64457 -0.75965  
Al -0.87889 0.12316 0.02140  
N -1.37900 1.89005 0.48110  
N -2.34448 -1.02944 -0.27186  
N 3.98152 -1.85735 0.41923  
N 4.38468 0.04380 -0.55777  
C -0.33336 2.85001 0.22626  
C 0.69530 3.10983 1.18935  
C 1.71346 4.03577 0.88185  
H 2.49085 4.23652 1.62932  
C 1.74759 4.71269 -0.34276  
H 2.54238 5.43604 -0.55684  
C 0.74083 4.46333 -1.28372  
H 0.75616 4.99574 -2.24207  
C -0.29997 3.55177 -1.02279  
C 0.72580 2.42756 2.55808  
H -0.11422 1.71259 2.57932

C 2.02512 1.62217 2.77562  
H 2.15360 0.86932 1.97583  
H 1.99836 1.09586 3.74683  
H 2.91533 2.27738 2.77637  
C 0.52355 3.44063 3.70853  
H 1.34205 4.18220 3.73801  
H 0.50742 2.92358 4.68483  
H -0.42293 3.99661 3.60203  
C -1.36213 3.31098 -2.09582  
H -2.18011 2.75409 -1.60655  
C -0.80724 2.41781 -3.22910  
H 0.03995 2.91046 -3.73985  
H -1.58375 2.20698 -3.98622  
H -0.44214 1.45260 -2.83421  
C -1.95291 4.61567 -2.67082  
H -2.34324 5.26994 -1.87294  
H -2.78241 4.38830 -3.36338  
H -1.20363 5.19472 -3.23974  
C -2.79942 4.36905 1.47724  
H -1.85984 4.73828 1.91879  
H -3.63523 4.71772 2.10892  
H -2.90578 4.84114 0.48602  
C -2.94846 1.72890 3.10508  
H -2.85020 0.63008 3.08772  
H -3.92273 1.97058 3.56666  
H -2.15727 2.12581 3.76223  
C -4.47303 2.02218 0.45567  
H -5.23788 2.63808 0.97410  
H -4.43550 2.41906 -0.57683  
C -4.91126 0.54011 0.45549  
H -5.98241 0.46758 0.17222  
H -4.85365 0.11449 1.47547  
C -4.10314 0.17275 -2.48535  
H -3.42333 1.03839 -2.55506  
H -5.12656 0.53237 -2.69551  
H -3.82654 -0.53694 -3.28233  
C -5.06095 -2.24592 -0.81469  
H -4.60403 -3.00885 -1.46558  
H -6.07033 -2.02396 -1.20357  
H -5.17473 -2.69158 0.18765  
C -1.98267 -2.42662 -0.24866  
C -1.49478 -3.08924 -1.42033  
C -1.14627 -4.45326 -1.34735  
H -0.77809 -4.95611 -2.24984  
C -1.26121 -5.17840 -0.15629  
H -0.99189 -6.24001 -0.12378  
C -1.73381 -4.53018 0.99176  
H -1.82899 -5.09415 1.92695  
C -2.10243 -3.17188 0.96878  
C -1.33949 -2.36941 -2.76132  
H -1.67355 -1.32909 -2.60902  
C 0.13517 -2.31730 -3.21862  
H 0.75831 -1.79899 -2.46562  
H 0.22743 -1.77285 -4.17584  
H 0.55053 -3.33050 -3.36674  
C -2.22625 -2.99866 -3.85989  
H -1.92650 -4.04017 -4.07419  
H -2.14148 -2.42879 -4.80256  
H -3.28924 -3.01491 -3.56493  
C -2.60134 -2.50905 2.25336  
H -3.08299 -1.56275 1.95087  
C -1.41647 -2.14573 3.17724  
H -0.86856 -3.05362 3.48805  
H -1.76480 -1.62791 4.08917  
H -0.69776 -1.48516 2.65871  
C -3.64554 -3.35213 3.01459  
H -4.49007 -3.63615 2.36404  
H -4.04900 -2.78110 3.86930  
H -3.21115 -4.28244 3.42225  
C 3.35580 -0.80618 -0.19897  
C 3.27210 -3.02478 1.01025  
H 4.06604 -3.76030 1.22505

C 2.59500 -2.62764 2.33189  
H 3.31894 -2.19123 3.04042  
H 2.13436 -3.51294 2.80063  
H 1.80058 -1.88517 2.13918  
C 2.29105 -3.65054 0.01199  
H 1.45918 -2.95875 -0.21363  
H 1.85281 -4.56481 0.44372  
H 2.79485 -3.91090 -0.93328  
C 5.36245 -1.66556 0.49745  
C 6.29704 -2.65199 1.12778  
H 6.04256 -2.85257 2.18383  
H 7.32894 -2.27014 1.10669  
H 6.29961 -3.62116 0.59634  
C 5.62735 -0.45434 -0.10868  
C 6.97076 0.20836 -0.19657  
H 7.35109 0.29919 -1.22724  
H 7.70061 -0.39256 0.36792  
H 6.96985 1.21559 0.25428  
C 4.11899 1.35822 -1.24205  
H 3.89984 2.09214 -0.44362  
C 2.89082 1.26641 -2.15916  
H 3.04679 0.51771 -2.95460  
H 2.72326 2.25363 -2.61875  
H 1.96393 1.00938 -1.61029  
C 5.30731 1.86550 -2.07913  
H 6.16537 2.19973 -1.48179  
H 4.96177 2.73562 -2.65992  
H 5.64484 1.09937 -2.79819

**II<sub>Cu</sub>**

SCF (BP86) Energy = -2031.04433624  
Enthalpy 0K = -2029.975119  
Enthalpy 298K = -2029.974175  
Free Energy 298K = -2030.142050  
Lowest Frequency = 12.0406 cm<sup>-1</sup>  
Second Frequency = 15.4502 cm<sup>-1</sup>  
SCF (BP86-D3BJ) Energy = -2031.35818912  
SCF (C6H6) Energy = -2031.04833466  
SCF (BS2) Energy = -2843.16780753

Cu -1.43371 -0.31723 -0.13702  
Si 3.83707 -1.08834 1.04855  
Si 3.26027 2.21440 -1.02908  
Al 0.90858 0.06851 -0.05576  
N 2.18898 -1.25574 0.35625  
N 1.64969 1.77879 -0.37036  
N -4.26366 0.35902 0.47938  
N -4.18637 -1.50643 -0.62082  
C 1.67663 -2.59847 0.22346  
C 1.00366 -3.24994 1.30659  
C 0.52019 -4.56233 1.13044  
H 0.01206 -5.05754 1.96680  
C 0.67474 -5.24611 -0.08049  
H 0.29788 -6.26873 -0.19347  
C 1.32322 -4.60654 -1.14405  
H 1.44695 -5.13676 -2.09552  
C 1.83179 -3.30017 -1.01573  
C 0.78574 -2.57014 2.65964  
H 1.24449 -1.56912 2.59420  
C -0.71562 -2.36999 2.96418  
H -1.19512 -1.76317 2.17336  
H -0.85120 -1.84980 3.92980  
H -1.24929 -3.33577 3.02491  
C 1.47423 -3.33692 3.81141  
H 1.04269 -4.34572 3.94041  
H 1.34864 -2.79816 4.76775  
H 2.55511 -3.46086 3.62889  
C 2.51662 -2.64421 -2.21514  
H 3.05449 -1.76214 -1.82549  
C 1.46703 -2.13418 -3.22955  
H 0.87372 -2.97364 -3.63516  
H 1.94978 -1.61585 -4.07769

H 0.76167 -1.43058 -2.75023  
C 3.54643 -3.55929 -2.91001  
H 4.29433 -3.94345 -2.19572  
H 4.08167 -3.00322 -3.69975  
H 3.06864 -4.43026 -3.39317  
C 4.67281 -2.79936 1.12878  
H 4.06638 -3.53083 1.68704  
H 5.65265 -2.71252 1.63042  
H 4.84375 -3.21298 0.12075  
C 3.80009 -0.35284 2.81231  
H 3.21456 0.58120 2.85066  
H 4.82552 -0.11952 3.15132  
H 3.35873 -1.05612 3.53748  
C 4.98165 0.03355 0.00512  
H 5.99612 -0.17105 0.40746  
H 5.00254 -0.34532 -1.03454  
C 4.71039 1.55497 0.02855  
H 5.59673 2.09867 -0.36108  
H 4.58560 1.91472 1.06777  
C 3.50592 1.52676 -2.79529  
H 3.28357 0.44702 -2.84293  
H 4.55186 1.66750 -3.12226  
H 2.85440 2.03581 -3.52448  
C 3.44172 4.11112 -1.07571  
H 2.61544 4.59575 -1.62030  
H 4.38818 4.38421 -1.57450  
H 3.46043 4.53695 -0.05832  
C 0.69627 2.84741 -0.20131  
C -0.14730 3.27514 -1.27752  
C -1.06225 4.32567 -1.06377  
H -1.69640 4.65425 -1.89612  
C -1.17633 4.96101 0.17814  
H -1.88338 5.78660 0.31762  
C -0.36389 4.53417 1.23611  
H -0.44725 5.02712 2.21187  
C 0.57223 3.49559 1.07053  
C -0.09621 2.62856 -2.66279  
H 0.66405 1.83051 -2.61732  
C -1.44129 1.96442 -3.03134  
H -1.72242 1.20977 -2.27260  
H -1.37193 1.46049 -4.01232  
H -2.25733 2.70732 -3.09295  
C 0.32804 3.63321 -3.75809  
H -0.40456 4.45420 -3.85774  
H 0.39949 3.13147 -4.73981  
H 1.30769 4.08905 -3.53639  
C 1.42096 3.06241 2.26567  
H 2.22391 2.42131 1.86204  
C 0.58754 2.20186 3.24308  
H -0.25379 2.78506 3.65982  
H 1.20500 1.84513 4.08703  
H 0.16051 1.31994 2.73165  
C 2.08330 4.24345 3.00570  
H 2.67430 4.87156 2.31778  
H 2.75971 3.87066 3.79496  
H 1.33903 4.89584 3.49659  
C -3.38595 -0.51357 -0.11711  
C -3.75847 1.57742 1.16957  
H -2.68585 1.58591 0.89635  
C -4.38956 2.86912 0.62889  
H -4.38096 2.87957 -0.47278  
H -3.78858 3.72586 0.97362  
H -5.42418 3.01574 0.98016  
C -3.85577 1.44344 2.69753  
H -4.90030 1.44118 3.05301  
H -3.34394 2.29769 3.17064  
H -3.36670 0.51714 3.03921  
C -5.59069 -0.08267 0.36314  
C -6.79689 0.63367 0.88979  
H -6.69102 0.90950 1.95223  
H -7.68114 -0.01783 0.80910  
H -7.01694 1.55776 0.32703



C -5.53792 -1.27017 -0.34057  
 C -6.64731 -2.18096 -0.76694  
 H -6.72321 -2.26321 -1.86640  
 H -7.61244 -1.79639 -0.40294  
 H -6.52775 -3.20263 -0.36385  
 C -3.66708 -2.67847 -1.37451  
 H -4.56304 -3.25100 -1.66948  
 C -2.78908 -3.56094 -0.47567  
 H -1.87892 -3.02061 -0.16251  
 H -2.47154 -4.46194 -1.02537  
 H -3.33511 -3.87653 0.42879  
 C -2.93572 -2.22415 -2.64719  
 H -3.58223 -1.59079 -3.27686  
 H -2.62582 -3.10473 -3.23407  
 H -2.03041 -1.64819 -2.38471

**TS (II-III)<sub>Cu</sub>**

SCF (BP86) Energy = -2219.61870797  
 Enthalpy 0K = -2218.534156  
 Enthalpy 298K = -2218.533211  
 Free Energy 298K = -2218.704789  
 Lowest Frequency = -151.1878 cm<sup>-1</sup>  
 Second Frequency = 16.3587 cm<sup>-1</sup>  
 SCF (BP86-D3BJ) Energy = -2219.95391095  
 SCF (C6H6) Energy = -2219.62253892  
 SCF (BS2) Energy = -3031.80340508

Cu 1.43359 0.23446 0.48342  
 Si -3.58081 1.42941 -1.21899  
 Si -3.51598 -1.98286 0.77727  
 Al -0.92485 -0.01266 0.18562  
 N -1.97292 1.44446 -0.40045  
 N -1.81638 -1.67710 0.26353  
 N 4.03077 -0.80348 -0.51161  
 N 4.33151 1.22147 0.20216  
 O -0.86466 0.20158 3.08254  
 O 1.40596 0.83735 3.12190  
 C -1.33411 2.74248 -0.36110  
 C -1.47057 3.58757 0.78988  
 C -0.91238 4.88183 0.76608  
 H -1.03901 5.52964 1.64110  
 C -0.20644 5.36085 -0.34220  
 H 0.21014 6.37416 -0.34127  
 C -0.03744 4.52287 -1.44954  
 H 0.52551 4.88569 -2.31805  
 C -0.58422 3.22508 -1.48439  
 C -2.19827 3.14155 2.06207  
 H -2.35066 2.05196 1.98284  
 C -1.36553 3.42225 3.33466  
 H -0.32607 3.06905 3.23575  
 H -1.81963 2.92253 4.20754  
 H -1.32310 4.50258 3.56199  
 C -3.59081 3.79634 2.21712  
 H -3.51277 4.89848 2.21053  
 H -4.05304 3.49714 3.17490  
 H -4.27724 3.50144 1.40828  
 C -0.34826 2.38019 -2.73894  
 H -0.91161 1.44103 -2.60944  
 C 1.14222 2.00479 -2.89862  
 H 1.77223 2.90533 -3.01884  
 H 1.29120 1.37094 -3.79165  
 H 1.50560 1.44801 -2.01559  
 C -0.86350 3.07395 -4.02021  
 H -1.92839 3.34900 -3.93714  
 H -0.74896 2.40856 -4.89456  
 H -0.29973 3.99933 -4.23501  
 C -4.19836 3.21075 -1.51034  
 H -4.37246 3.77781 -0.58360  
 H -5.15122 3.16639 -2.06742  
 H -3.47982 3.78736 -2.11570  
 C -3.57263 0.63642 -2.95986  
 H -3.02658 1.26024 -3.68576

H -4.61589 0.55029 -3.31535  
 H -3.13183 -0.37185 -2.97957  
 C -4.88284 0.48437 -0.18852  
 H -4.83538 0.82982 0.86135  
 H -5.86059 0.84255 -0.57227  
 C -4.82583 -1.05901 -0.26778  
 H -4.74282 -1.39246 -1.31961  
 H -5.78461 -1.48683 0.09454  
 C -3.81829 -1.46526 2.58923  
 H -3.25141 -2.09053 3.29766  
 H -4.89130 -1.56359 2.83347  
 H -3.52643 -0.41730 2.76707  
 C -3.91857 -3.83434 0.56949  
 H -3.91096 -4.12479 -0.49473  
 H -4.92749 -4.03895 0.96869  
 H -3.20385 -4.48808 1.09345  
 C -1.00982 -2.84676 -0.00516  
 C -0.35601 -3.57134 1.04509  
 C 0.38831 -4.72762 0.73320  
 H 0.86944 -5.28160 1.54831  
 C 0.52275 -5.18836 -0.58123  
 H 1.09581 -6.09673 -0.79831  
 C -0.10204 -4.47606 -1.61196  
 H -0.01280 -4.83228 -2.64513  
 C -0.87017 -3.32519 -1.35004  
 C -0.42606 -3.14008 2.51003  
 H -1.03183 -2.22133 2.54947  
 C 0.97690 -2.80102 3.06271  
 H 1.62997 -3.69225 3.08143  
 H 0.90838 -2.41861 4.09689  
 H 1.47490 -2.03477 2.44262  
 C -1.10401 -4.20161 3.40626  
 H -2.12766 -4.43110 3.06697  
 H -1.16488 -3.84399 4.44967  
 H -0.53545 -5.14890 3.41321  
 C -1.53883 -2.60828 -2.51964  
 H -2.24328 -1.88827 -2.07069  
 C -0.50640 -1.80446 -3.34152  
 H 0.03679 -1.08301 -2.70478  
 H -0.99806 -1.24096 -4.15452  
 H 0.24276 -2.47618 -3.79839  
 C -2.34639 -3.55418 -3.43369  
 H -1.69605 -4.26789 -3.97041  
 H -2.89356 -2.97386 -4.19757  
 H -3.08248 -4.14130 -2.85893  
 C 3.37316 0.24444 0.08975  
 C 3.33565 -2.09698 -0.75557  
 H 2.29054 -1.87317 -0.46651  
 C 3.33496 -2.50150 -2.23685  
 H 3.01028 -1.66364 -2.87473  
 H 2.61974 -3.32940 -2.37030  
 H 4.32230 -2.84966 -2.58232  
 C 3.85390 -3.20314 0.17663  
 H 3.84953 -2.86337 1.22476  
 H 4.87492 -3.53043 -0.08332  
 H 3.18478 -4.07506 0.09751  
 C 5.37466 -0.49509 -0.76667  
 C 6.36412 -1.39246 -1.44571  
 H 6.41229 -2.39273 -0.98494  
 H 7.37153 -0.95286 -1.37779  
 H 6.13791 -1.53042 -2.51755  
 C 5.56380 0.79270 -0.30785  
 C 6.79270 1.64778 -0.33442  
 H 7.08085 1.99924 0.67217  
 H 6.66653 2.54029 -0.97426  
 H 7.64228 1.07595 -0.73810  
 C 4.15805 2.52764 0.89328  
 H 4.93798 3.18118 0.46379  
 C 2.79722 3.16197 0.59591  
 H 2.63067 3.28244 -0.48493  
 H 2.74813 4.15753 1.06638  
 H 1.96486 2.56062 1.00254

C 4.42385 2.36629 2.40086  
H 3.65896 1.71794 2.85460  
H 4.38526 3.35096 2.89641  
H 5.41721 1.92512 2.58984  
C 0.28261 0.48934 2.89190

**III<sub>Cu</sub>**

SCF (BP86) Energy = -2219.65240636  
Enthalpy 0K = -2218.566407  
Enthalpy 298K = -2218.565463  
Free Energy 298K = -2218.733986  
Lowest Frequency = 13.1394 cm<sup>-1</sup>  
Second Frequency = 20.5553 cm<sup>-1</sup>  
SCF (BP86-D3BJ) Energy = -2219.98860471  
SCF (C6H6) Energy = -2219.65792566  
SCF (BS2) Energy = -3031.83544960

Cu 1.46245 -0.25837 -0.82682  
Si -3.43954 -1.39852 1.36783  
Si -3.54285 2.01260 -0.71684  
Al -1.16759 -0.06438 -0.54568  
N -1.89771 -1.47722 0.43215  
N -1.81740 1.67015 -0.30925  
N 3.89792 0.82795 0.55632  
N 4.26097 -1.14147 -0.28310  
O -1.11106 -0.47084 -2.37228  
O 0.99307 -0.85909 -3.17769  
C -1.21937 -2.75826 0.40336  
C -1.41154 -3.68256 -0.67842  
C -0.74599 -4.92575 -0.64313  
H -0.90078 -5.62782 -1.47044  
C 0.08506 -5.29464 0.41855  
H 0.57817 -6.27298 0.42585  
C 0.26675 -4.39725 1.47599  
H 0.90957 -4.67930 2.31873  
C -0.36376 -3.13809 1.49052  
C -2.33962 -3.42017 -1.86997  
H -2.72509 -2.39205 -1.77066  
C -1.60310 -3.52780 -3.22573  
H -0.73318 -2.85818 -3.28411  
H -2.28813 -3.26010 -4.04925  
H -1.25732 -4.56133 -3.40966  
C -3.54448 -4.39149 -1.87903  
H -3.21097 -5.43603 -2.01460  
H -4.22536 -4.14943 -2.71428  
H -4.12248 -4.34966 -0.94293  
C -0.11817 -2.23007 2.69764  
H -0.73188 -1.32578 2.55426  
C 1.35558 -1.77727 2.78801  
H 2.03460 -2.63902 2.92394  
H 1.50220 -1.09901 3.64832  
H 1.66417 -1.24522 1.87103  
C -0.54986 -2.90306 4.02057  
H -1.59681 -3.24771 3.98107  
H -0.45057 -2.19945 4.86648  
H 0.07710 -3.78360 4.24861  
C -4.10921 -3.15662 1.67622  
H -4.62420 -3.56726 0.79363  
H -4.84265 -3.11406 2.50070  
H -3.31428 -3.86335 1.96352  
C -3.31486 -0.60951 3.10465  
H -2.79008 -1.26918 3.81396  
H -4.33977 -0.45748 3.49037  
H -2.80940 0.36724 3.11002  
C -4.79055 -0.43519 0.41258  
H -4.82145 -0.80409 -0.63045  
H -5.73473 -0.79587 0.87194  
C -4.75681 1.11160 0.45471  
H -4.58418 1.46947 1.48758  
H -5.75258 1.51303 0.17123  
C -3.95407 1.44274 -2.49010  
H -3.42661 2.05300 -3.24109

H -5.03905 1.53281 -2.67763  
H -3.66562 0.39296 -2.66542  
C -3.89332 3.87480 -0.54177  
H -3.81486 4.20389 0.50750  
H -4.92102 4.08367 -0.88717  
H -3.20024 4.49190 -1.13468  
C -0.97685 2.81956 -0.07673  
C -0.33865 3.51009 -1.16003  
C 0.39867 4.68230 -0.89337  
H 0.86347 5.21504 -1.73155  
C 0.54221 5.18809 0.40360  
H 1.10485 6.11116 0.58295  
C -0.05834 4.50163 1.46592  
H 0.03965 4.89245 2.48601  
C -0.81843 3.33547 1.25155  
C -0.43369 3.04153 -2.61400  
H -1.00707 2.10041 -2.62322  
C 0.96289 2.74913 -3.20912  
H 1.57075 3.66916 -3.28392  
H 0.87138 2.32108 -4.22206  
H 1.51943 2.02351 -2.59107  
C -1.18016 4.06007 -3.50674  
H -2.20266 4.25424 -3.14267  
H -1.25439 3.68225 -4.54182  
H -0.65022 5.02891 -3.54277  
C -1.46543 2.65083 2.45199  
H -2.13070 1.87725 2.03458  
C -0.41000 1.94158 3.32946  
H 0.17161 1.20992 2.74252  
H -0.88919 1.40227 4.16601  
H 0.29925 2.66966 3.76274  
C -2.32136 3.60857 3.30853  
H -1.70582 4.38269 3.80077  
H -2.84241 3.04910 4.10556  
H -3.08342 4.12615 2.70207  
C 3.28386 -0.19006 -0.12919  
C 3.20006 2.11942 0.80657  
H 2.15546 1.90516 0.51464  
C 3.20483 2.52426 2.28739  
H 2.88898 1.68714 2.93042  
H 2.48473 3.34738 2.42071  
H 4.19066 2.88144 2.62582  
C 3.73415 3.21960 -0.12447  
H 3.70532 2.88860 -1.17495  
H 4.76840 3.51186 0.12433  
H 3.09136 4.10884 -0.02988  
C 5.23937 0.52505 0.82900  
C 6.19378 1.39077 1.59402  
H 6.23181 2.42234 1.20761  
H 7.21104 0.97642 1.51774  
H 5.94046 1.44554 2.66710  
C 5.46651 -0.72658 0.29181  
C 6.71485 -1.55365 0.29145  
H 7.04930 -1.80427 -0.73078  
H 6.58790 -2.50217 0.84378  
H 7.53295 -1.00098 0.77788  
C 4.12159 -2.40139 -1.06932  
H 5.01336 -2.99356 -0.80238  
C 2.88490 -3.20028 -0.64784  
H 2.88698 -3.41282 0.43185  
H 2.86506 -4.15842 -1.19174  
H 1.94669 -2.66938 -0.88746  
C 4.16110 -2.09960 -2.57717  
H 3.26498 -1.53659 -2.88676  
H 4.18197 -3.04690 -3.14186  
H 5.06143 -1.52004 -2.84349  
C 0.19859 -0.55095 -2.27602

**TS(III-IV)<sub>Cu</sub>**

SCF (BP86) Energy = -2219.63352751  
Enthalpy 0K = -2218.549121  
Enthalpy 298K = -2218.548175

Free Energy 298K = -2218.718141  
 Lowest Frequency = -150.2391 cm<sup>-1</sup>  
 Second Frequency = -9.7014 cm<sup>-1</sup>  
 SCF (BP86-D3BJ) Energy = -2219.95768034  
 SCF (C6H6) Energy = -2219.63952310  
 SCF (BS2) Energy = -3031.81488535

Cu -2.03190 0.36345 -0.98805  
 Si 3.57067 1.35562 1.59732  
 Si 3.77463 -2.11516 -0.37686  
 Al 1.45760 0.04177 -0.51090  
 N 2.16614 1.44776 0.47324  
 N 2.02892 -1.70144 -0.21573  
 N -4.72110 1.19055 -0.26833  
 N -4.29271 -0.80858 0.47518  
 O 1.23589 0.44378 -2.33504  
 O -0.98885 0.74894 -2.65776  
 C 1.52655 2.73548 0.27999  
 C 1.87361 3.57814 -0.82737  
 C 1.20516 4.80927 -0.98592  
 H 1.47319 5.44813 -1.83517  
 C 0.22350 5.24126 -0.08908  
 H -0.27514 6.20612 -0.23292  
 C -0.09989 4.20849 1.00244  
 H -0.85547 4.76584 1.72227  
 C 0.53083 3.18593 1.20735  
 C 2.97099 3.23471 -1.84040  
 H 3.33689 2.22181 -1.59779  
 C 2.45302 3.22304 -3.29714  
 H 1.62700 2.50936 -3.42694  
 H 3.26725 2.93181 -3.98463  
 H 2.10707 4.22587 -3.60625  
 C 4.16242 4.21692 -1.73269  
 H 3.85564 5.24110 -2.01124  
 H 4.97354 3.91534 -2.41909  
 H 4.57453 4.26356 -0.71238  
 C 0.14378 2.37856 2.44811  
 H 0.73365 1.44749 2.42635  
 C -1.34723 1.97981 2.45181  
 H -2.00308 2.86837 2.49268  
 H -1.57950 1.35531 3.33346  
 H -1.61364 1.40745 1.54480  
 C 0.49231 3.14049 3.74782  
 H 1.55613 3.42989 3.77908  
 H 0.27835 2.51881 4.63589  
 H -0.10285 4.06674 3.83968  
 C 4.25968 3.10173 1.92227  
 H 4.90414 3.44844 1.09885  
 H 4.87198 3.08199 2.84085  
 H 3.45941 3.84639 2.06116  
 C 3.17969 0.61591 3.31606  
 H 2.58492 1.30656 3.93490  
 H 4.13210 0.43128 3.84605  
 H 2.63938 -0.34143 3.25952  
 C 4.98969 0.30545 0.85767  
 H 5.18172 0.64303 -0.17872  
 H 5.88136 0.62879 1.43466  
 C 4.86413 -1.23558 0.92622  
 H 4.53694 -1.55531 1.93390  
 H 5.86498 -1.69654 0.78785  
 C 4.43111 -1.59097 -2.09042  
 H 3.99459 -2.20214 -2.89672  
 H 5.52944 -1.70007 -2.13498  
 H 4.19159 -0.53681 -2.31365  
 C 4.02225 -3.98324 -0.11363  
 H 3.82558 -4.26573 0.93405  
 H 5.06781 -4.25120 -0.34556  
 H 3.36220 -4.59230 -0.75061  
 C 1.08997 -2.79420 -0.11213  
 C 0.56577 -3.44765 -1.27580  
 C -0.30866 -4.54244 -1.11436  
 H -0.69269 -5.04633 -2.00905

C -0.68334 -5.01120 0.14968  
 H -1.34535 -5.87905 0.24793  
 C -0.17879 -4.36799 1.28674  
 H -0.45201 -4.73700 2.28280  
 C 0.70150 -3.27402 1.18124  
 C 0.93825 -3.03477 -2.70244  
 H 1.54723 -2.11864 -2.63503  
 C -0.30528 -2.70712 -3.56038  
 H -0.93825 -3.59986 -3.71451  
 H 0.00436 -2.34388 -4.55562  
 H -0.92523 -1.92240 -3.09911  
 C 1.78210 -4.12320 -3.40775  
 H 2.70940 -4.35136 -2.85673  
 H 2.06307 -3.79427 -4.42407  
 H 1.21458 -5.06602 -3.50739  
 C 1.22397 -2.62377 2.45996  
 H 2.01945 -1.92787 2.14514  
 C 0.12127 -1.79224 3.15293  
 H -0.29321 -1.02926 2.47125  
 H 0.51699 -1.27324 4.04419  
 H -0.71175 -2.43854 3.48278  
 C 1.83850 -3.63712 3.44912  
 H 1.08048 -4.33261 3.85189  
 H 2.28783 -3.10993 4.30924  
 H 2.62589 -4.24443 2.97182  
 C -3.72320 0.24848 -0.19334  
 C -4.61443 2.47783 -1.01041  
 H -5.55484 3.00899 -0.78639  
 C -3.44965 3.33486 -0.49842  
 H -3.52691 3.50886 0.58644  
 H -3.45696 4.31015 -1.01240  
 H -2.47598 2.85662 -0.70140  
 C -4.54388 2.22486 -2.52661  
 H -5.39651 1.61461 -2.86874  
 H -3.60879 1.70328 -2.79138  
 H -4.56635 3.18683 -3.06549  
 C -5.89759 0.72906 0.33522  
 C -7.15578 1.53598 0.42362  
 H -7.01368 2.46972 0.99724  
 H -7.93918 0.95656 0.93541  
 H -7.54882 1.81175 -0.57133  
 C -5.63033 -0.54077 0.80510  
 C -6.54386 -1.46713 1.54823  
 H -6.26003 -1.57702 2.60946  
 H -6.56977 -2.47624 1.10431  
 H -7.57188 -1.07358 1.52187  
 C -3.55144 -2.08615 0.65175  
 H -2.51466 -1.81171 0.38279  
 C -3.54466 -2.58315 2.10438  
 H -3.27732 -1.77288 2.80170  
 H -2.78230 -3.37385 2.19227  
 H -4.51101 -3.01388 2.41174  
 C -4.03261 -3.14850 -0.34972  
 H -5.05521 -3.49844 -0.12676  
 H -3.35372 -4.01547 -0.30641  
 H -4.01409 -2.75007 -1.37697  
 C -0.01232 0.46385 -1.89642

**IV<sub>Cu</sub>**  
 SCF (BP86) Energy = -2219.64915385  
 Enthalpy 0K = -2218.563655  
 Enthalpy 298K = -2218.562710  
 Free Energy 298K = -2218.736614  
 Lowest Frequency = 6.8496 cm<sup>-1</sup>  
 Second Frequency = 12.6118 cm<sup>-1</sup>  
 SCF (BP86-D3BJ) Energy = -2219.96202696  
 SCF (C6H6) Energy = -2219.65704470  
 SCF (BS2) Energy = -3031.83326421

Cu 2.78703 -0.75484 -0.83334  
 Si -3.99392 -0.85254 1.84283  
 Si -3.60220 2.65757 0.03050

Al -1.68077 0.06960 -0.27949  
 N -2.82838 -1.15072 0.51170  
 N -1.98109 1.88684 -0.05977  
 N 5.52114 -1.61498 -0.24661  
 N 5.15837 0.45482 0.31186  
 O -1.05622 -0.51107 -1.99049  
 O 1.12609 -0.87765 -1.63108  
 C -2.71374 -2.50931 0.02169  
 C -3.48123 -2.93764 -1.10709  
 C -3.36371 -4.26736 -1.55534  
 H -3.95347 -4.58875 -2.42196  
 C -2.51453 -5.18295 -0.92492  
 H -2.44181 -6.21418 -1.28749  
 C -1.75505 -4.76039 0.17087  
 H -1.08121 -5.47056 0.66548  
 C -1.83254 -3.44034 0.65678  
 C -4.41612 -1.99486 -1.86669  
 H -4.38972 -1.02557 -1.33758  
 C -3.92632 -1.76230 -3.31504  
 H -2.88981 -1.39025 -3.32945  
 H -4.57344 -1.02876 -3.82945  
 H -3.95977 -2.70018 -3.89852  
 C -5.87969 -2.49080 -1.86712  
 H -5.97752 -3.45730 -2.39308  
 H -6.53331 -1.76578 -2.38419  
 H -6.26804 -2.62992 -0.84405  
 C -0.95572 -3.05221 1.84896  
 H -1.15058 -1.98711 2.06092  
 C 0.54818 -3.19252 1.52065  
 H 0.81544 -4.24264 1.30355  
 H 1.16430 -2.85923 2.37568  
 H 0.81621 -2.58423 0.64025  
 C -1.30500 -3.86493 3.11635  
 H -2.36563 -3.74876 3.39607  
 H -0.68816 -3.53829 3.97313  
 H -1.11958 -4.94356 2.96539  
 C -5.04682 -2.41253 2.12616  
 H -5.70657 -2.62168 1.26847  
 H -5.68224 -2.27043 3.01787  
 H -4.42332 -3.30648 2.28750  
 C -3.12788 -0.42473 3.49089  
 H -2.57443 -1.28974 3.89192  
 H -3.87655 -0.12413 4.24591  
 H -2.41467 0.40817 3.37777  
 C -5.20016 0.57913 1.44715  
 H -5.67512 0.37504 0.46865  
 H -6.01391 0.46348 2.19353  
 C -4.65352 2.02528 1.49970  
 H -4.08885 2.19570 2.43647  
 H -5.50181 2.74095 1.54213  
 C -4.60703 2.33821 -1.56007  
 H -4.15450 2.83573 -2.43314  
 H -5.63901 2.71675 -1.44946  
 H -4.67185 1.26023 -1.78817  
 C -3.39113 4.53190 0.29212  
 H -2.93758 4.74961 1.27374  
 H -4.37864 5.02433 0.25821  
 H -2.75120 4.99331 -0.47661  
 C -0.83229 2.75917 -0.12550  
 C -0.35223 3.27229 -1.37333  
 C 0.74059 4.16367 -1.37556  
 H 1.09236 4.56574 -2.33296  
 C 1.37215 4.55947 -0.19158  
 H 2.19571 5.28269 -0.21558  
 C 0.91846 4.03849 1.02771  
 H 1.40018 4.35238 1.96141  
 C -0.16773 3.14498 1.08402  
 C -0.98913 2.90926 -2.71680  
 H -1.76651 2.15343 -2.51641  
 C 0.03105 2.28010 -3.69275  
 H 0.82904 2.99641 -3.96094  
 H -0.47320 1.98089 -4.62832

H 0.49956 1.38169 -3.26242  
 C -1.66605 4.13445 -3.37496  
 H -2.43286 4.58364 -2.72168  
 H -2.15328 3.84447 -4.32301  
 H -0.92699 4.92207 -3.60839  
 C -0.59776 2.57466 2.43449  
 H -1.61498 2.17067 2.29258  
 C 0.31674 1.39159 2.83082  
 H 0.31828 0.60978 2.05023  
 H -0.01342 0.93047 3.77889  
 H 1.35918 1.73402 2.96381  
 C -0.65727 3.62228 3.56471  
 H 0.34353 4.00882 3.82892  
 H -1.08105 3.17251 4.47973  
 H -1.28556 4.48511 3.28559  
 C 4.54569 -0.65178 -0.22164  
 C 5.31444 -3.00186 -0.74680  
 H 6.30060 -3.48646 -0.65273  
 C 4.31246 -3.76024 0.13768  
 H 4.62882 -3.75642 1.19364  
 H 4.23450 -4.80689 -0.20019  
 H 3.31024 -3.30309 0.07495  
 C 4.91601 -3.00084 -2.23150  
 H 5.65081 -2.45125 -2.84243  
 H 3.92640 -2.53204 -2.37377  
 H 4.85877 -4.03803 -2.60125  
 C 6.72907 -1.12298 0.26269  
 C 7.97681 -1.94283 0.37423  
 H 7.84654 -2.81482 1.04008  
 H 8.79122 -1.33292 0.79360  
 H 8.32021 -2.31858 -0.60628  
 C 6.50241 0.19353 0.61464  
 C 7.45908 1.17262 1.22351  
 H 7.21802 1.39402 2.27778  
 H 7.48191 2.13069 0.67843  
 H 8.47929 0.75949 1.19949  
 C 4.42435 1.74592 0.43062  
 H 3.38379 1.46048 0.18845  
 C 4.43360 2.30672 1.85976  
 H 4.16954 1.52809 2.59380  
 H 3.67578 3.10432 1.92262  
 H 5.40551 2.74460 2.13921  
 C 4.88713 2.75873 -0.62805  
 H 5.90350 3.13974 -0.43075  
 H 4.19403 3.61566 -0.62619  
 H 4.86861 2.30762 -1.63331  
 C -0.01712 -0.51264 -1.16979

**TS (IV-A)<sub>Cu</sub>**

SCF (BP86) Energy = -2219.64383775  
 Enthalpy 0K = -2218.559528  
 Enthalpy 298K = -2218.558584  
 Free Energy 298K = -2218.733297  
 Lowest Frequency = -57.1257 cm<sup>-1</sup>  
 Second Frequency = 5.7700 cm<sup>-1</sup>  
 SCF (BP86-D3BJ) Energy = -2219.95123059  
 SCF (C6H6) Energy = -2219.65231738  
 SCF (BS2) Energy = -3031.82957902

Cu 2.98583 0.66929 -0.52091  
 Si -3.43716 -2.20772 1.68637  
 Si -4.86186 0.90682 -0.35522  
 Al -1.76971 -0.08594 -0.14730  
 N -2.10175 -1.76166 0.57405  
 N -3.10140 1.19867 -0.18886  
 N 5.63670 -0.48537 -0.86799  
 N 5.63404 1.15928 0.55555  
 O -0.59445 -0.12549 -1.67746  
 O 1.21227 0.95147 -0.85682  
 C -1.11681 -2.77042 0.25503  
 C -1.24729 -3.55286 -0.93647  
 C -0.28179 -4.53616 -1.22583

H -0.39017 -5.13286 -2.13938  
 C 0.80458 -4.77174 -0.37591  
 H 1.53666 -5.55201 -0.61268  
 C 0.93857 -3.99979 0.78356  
 H 1.78676 -4.17866 1.45578  
 C 0.00365 -2.99920 1.11641  
 C -2.39845 -3.35110 -1.92339  
 H -3.05421 -2.57338 -1.49321  
 C -1.88748 -2.84194 -3.29132  
 H -1.30323 -1.91497 -3.17840  
 H -2.73545 -2.64396 -3.97165  
 H -1.24196 -3.59597 -3.77760  
 C -3.24397 -4.63159 -2.10624  
 H -2.64810 -5.44868 -2.55110  
 H -4.09622 -4.43866 -2.78184  
 H -3.64555 -4.99918 -1.14689  
 C 0.22448 -2.19637 2.40003  
 H -0.59201 -1.45745 2.46295  
 C 1.55588 -1.41233 2.37195  
 H 2.42436 -2.09271 2.30659  
 H 1.67017 -0.81115 3.29211  
 H 1.59270 -0.72596 1.50830  
 C 0.16140 -3.09249 3.65830  
 H -0.79516 -3.63741 3.72437  
 H 0.27358 -2.48680 4.57564  
 H 0.97063 -3.84484 3.65560  
 C -3.43739 -4.09371 1.94876  
 H -3.73048 -4.63090 1.03177  
 H -4.16088 -4.35547 2.74062  
 H -2.44717 -4.47108 2.25052  
 C -3.27788 -1.36829 3.39562  
 H -2.42610 -1.76896 3.96911  
 H -4.19394 -1.54199 3.98868  
 H -3.14060 -0.27754 3.30688  
 C -5.15435 -1.73470 0.98995  
 H -5.25133 -2.15560 -0.02898  
 H -5.86468 -2.31865 1.61242  
 C -5.55674 -0.24064 1.01004  
 H -5.33626 0.21053 1.99638  
 H -6.65749 -0.15216 0.89271  
 C -5.28567 0.08894 -2.02851  
 H -5.10676 0.77299 -2.87377  
 H -6.34835 -0.21230 -2.05440  
 H -4.67919 -0.81736 -2.19997  
 C -5.79009 2.56104 -0.19505  
 H -5.69695 2.97062 0.82493  
 H -6.86362 2.41059 -0.40400  
 H -5.40740 3.32282 -0.89264  
 C -2.62406 2.56600 -0.22113  
 C -2.35542 3.23374 -1.45790  
 C -1.90021 4.56772 -1.43236  
 H -1.70058 5.07621 -2.38297  
 C -1.69254 5.25328 -0.23162  
 H -1.33752 6.28982 -0.23767  
 C -1.94311 4.59548 0.97795  
 H -1.77688 5.12424 1.92383  
 C -2.41011 3.26834 1.00784  
 C -2.54203 2.56157 -2.82026  
 H -2.81471 1.50994 -2.63062  
 C -1.23961 2.56075 -3.65284  
 H -0.91529 3.58827 -3.89797  
 H -1.39929 2.02759 -4.60708  
 H -0.42244 2.05626 -3.11513  
 C -3.68654 3.21984 -3.62578  
 H -4.64334 3.19872 -3.07726  
 H -3.83387 2.69943 -4.58935  
 H -3.45789 4.27725 -3.85056  
 C -2.63636 2.59357 2.36027  
 H -3.20108 1.66668 2.15785  
 C -1.28598 2.18856 2.99679  
 H -0.70703 1.53559 2.31984  
 H -1.44000 1.65219 3.95069

H -0.66835 3.08144 3.20342  
 C -3.46847 3.44901 3.33849  
 H -2.93650 4.36932 3.63901  
 H -3.68189 2.88025 4.26093  
 H -4.43126 3.75198 2.89294  
 C 4.81167 0.43024 -0.26937  
 C 5.17660 -1.50584 -1.85217  
 H 6.08972 -2.05662 -2.13356  
 C 4.19294 -2.49181 -1.20328  
 H 4.63165 -2.96353 -0.30884  
 H 3.92991 -3.28429 -1.92267  
 H 3.25913 -1.98559 -0.90477  
 C 4.60532 -0.83824 -3.11359  
 H 5.32897 -0.13494 -3.55773  
 H 3.67827 -0.28546 -2.88117  
 H 4.36198 -1.61008 -3.86232  
 C 6.95757 -0.33708 -0.42881  
 C 8.08774 -1.20000 -0.89736  
 H 7.93651 -2.26332 -0.63851  
 H 9.02784 -0.88047 -0.42277  
 H 8.23460 -1.13925 -1.99051  
 C 6.96044 0.70899 0.47367  
 C 8.11508 1.26329 1.25111  
 H 8.05530 1.01669 2.32564  
 H 8.19391 2.35954 1.16435  
 H 9.05669 0.83882 0.87011  
 C 5.09627 2.29918 1.34745  
 H 4.00624 2.21542 1.17705  
 C 5.35065 2.14482 2.85459  
 H 5.04743 1.14566 3.20655  
 H 4.74954 2.89327 3.39674  
 H 6.40557 2.31177 3.12547  
 C 5.55695 3.65180 0.78062  
 H 6.63684 3.82254 0.92506  
 H 5.02001 4.46529 1.29606  
 H 5.33179 3.72080 -0.29580  
 C 0.05126 0.44575 -0.67376

**Acu**

SCF (BP86) Energy = -2219.65595776  
 Enthalpy 0K = -2218.570426  
 Enthalpy 298K = -2218.569482  
 Free Energy 298K = -2218.744187  
 Lowest Frequency = 9.0803 cm<sup>-1</sup>  
 Second Frequency = 10.6532 cm<sup>-1</sup>  
 SCF (BP86-D3BJ) Energy = -2219.96727440  
 SCF (C6H6) Energy = -2219.66269536  
 SCF (BS2) Energy = -3031.84001718

Cu -2.86512 0.23896 -0.88656  
 Si 4.22211 -1.86937 -0.45325  
 Si 4.03310 1.66209 1.40520  
 Al 1.63208 0.06107 -0.13000  
 N 2.47220 -1.58938 -0.16704  
 N 2.53781 1.57557 0.41875  
 N -5.07048 -1.16266 0.40876  
 N -5.65972 0.81424 -0.27880  
 O -0.25017 -0.06607 0.34300  
 O -1.17002 0.51997 -1.65862  
 C 1.60021 -2.73777 -0.06264  
 C 1.28145 -3.27350 1.22587  
 C 0.42850 -4.38966 1.32111  
 H 0.19395 -4.79672 2.31208  
 C -0.11093 -4.99729 0.18083  
 H -0.75646 -5.87826 0.27257  
 C 0.19971 -4.47292 -1.07891  
 H -0.21551 -4.94669 -1.97650  
 C 1.04098 -3.35175 -1.22878  
 C 1.83030 -2.65662 2.51278  
 H 2.56327 -1.88976 2.20665  
 C 0.71412 -1.94807 3.31481  
 H 0.20222 -1.18775 2.70235

H 1.12912 -1.45373 4.21173  
H -0.04644 -2.67419 3.65558  
C 2.56633 -3.68528 3.39900  
H 1.88068 -4.46547 3.77541  
H 3.01209 -3.18790 4.27863  
H 3.37524 -4.19328 2.84717  
C 1.33427 -2.85033 -2.64526  
H 1.94354 -1.93587 -2.54562  
C 0.04906 -2.47236 -3.41638  
H -0.61594 -3.34523 -3.54682  
H 0.30532 -2.10008 -4.42433  
H -0.51427 -1.68037 -2.89843  
C 2.15019 -3.88551 -3.45512  
H 3.09832 -4.14569 -2.95563  
H 2.39003 -3.49204 -4.45924  
H 1.58034 -4.82213 -3.59237  
C 4.60455 -3.72311 -0.25082  
H 4.51155 -4.03662 0.80247  
H 5.64058 -3.92592 -0.57373  
H 3.92894 -4.35802 -0.84553  
C 4.74967 -1.30021 -2.19805  
H 4.31195 -1.93658 -2.98433  
H 5.84886 -1.34304 -2.30079  
H 4.43783 -0.26058 -2.39802  
C 5.33284 -0.94412 0.79979  
H 5.03097 -1.23967 1.82279  
H 6.33346 -1.40256 0.65173  
C 5.44760 0.59450 0.68451  
H 5.61822 0.89836 -0.36597  
H 6.34814 0.94046 1.23431  
C 3.74354 1.07324 3.19912  
H 3.10906 1.77850 3.76036  
H 4.70627 0.98594 3.73417  
H 3.25392 0.08495 3.23024  
C 4.65889 3.45924 1.43801  
H 5.00043 3.78292 0.44070  
H 5.51196 3.54490 2.13352  
H 3.87761 4.16423 1.76412  
C 1.90587 2.81698 0.02145  
C 0.98988 3.48752 0.89224  
C 0.39854 4.69517 0.47070  
H -0.29799 5.20810 1.14490  
C 0.67588 5.25106 -0.78257  
H 0.20510 6.19129 -1.09033  
C 1.56210 4.58798 -1.63840  
H 1.77795 5.01337 -2.62556  
C 2.18746 3.38422 -1.26214  
C 0.61851 2.94159 2.27278  
H 1.14979 1.98290 2.39573  
C -0.89502 2.65003 2.38943  
H -1.49336 3.57012 2.26047  
H -1.13060 2.23675 3.38695  
H -1.21128 1.91612 1.63063  
C 1.07125 3.89115 3.40571  
H 2.15648 4.08598 3.36904  
H 0.83513 3.45881 4.39482  
H 0.55828 4.86746 3.33913  
C 3.12803 2.70582 -2.25882  
H 3.59045 1.85347 -1.73002  
C 2.34422 2.14422 -3.46823  
H 1.54714 1.45527 -3.14265  
H 3.01853 1.60166 -4.15532  
H 1.86604 2.95927 -4.04081  
C 4.26575 3.63692 -2.73205  
H 3.87622 4.49986 -3.30104  
H 4.95984 3.09173 -3.39608  
H 4.84682 4.03479 -1.88275  
C -4.59398 -0.05140 -0.23449  
C -4.24806 -2.37438 0.69316  
H -4.94370 -3.07872 1.17987  
C -3.74380 -3.01171 -0.61066  
H -4.57896 -3.26393 -1.28527

H -3.17832 -3.92912 -0.38078  
H -3.06044 -2.32499 -1.14051  
C -3.10960 -2.04809 1.67202  
H -3.50081 -1.60984 2.60545  
H -2.38671 -1.34173 1.22667  
H -2.55927 -2.97087 1.91834  
C -6.41235 -0.99988 0.77057  
C -7.20920 -2.04649 1.48552  
H -7.30392 -2.97530 0.89477  
H -8.22816 -1.67859 1.67967  
H -6.76490 -2.31448 2.46059  
C -6.79122 0.25595 0.33609  
C -8.13258 0.91380 0.44910  
H -8.64010 1.00537 -0.52723  
H -8.07244 1.92288 0.88952  
H -8.78570 0.31356 1.10119  
C -5.50978 2.16816 -0.87724  
H -4.48597 2.13177 -1.29519  
C -6.48607 2.41023 -2.03853  
H -6.45746 1.57654 -2.75880  
H -6.19111 3.33024 -2.56975  
H -7.52457 2.54676 -1.69611  
C -5.53892 3.27214 0.19202  
H -6.53669 3.39246 0.64591  
H -5.26702 4.23510 -0.27127  
H -4.81168 3.05910 0.99155  
C -0.14325 0.30511 -0.93236

**TS (III-S)<sub>Cu</sub>**

SCF (BP86) Energy = -2219.64619075  
Enthalpy 0K = -2218.561456  
Enthalpy 298K = -2218.560511  
Free Energy 298K = -2218.729162  
Lowest Frequency = -50.7251 cm<sup>-1</sup>  
Second Frequency = 14.9841 cm<sup>-1</sup>  
SCF (BP86-D3BJ) Energy = -2219.97072098  
SCF (C6H6) Energy = -2219.65301778  
SCF (BS2) Energy = -3031.83061770

Cu 1.93063 -0.39169 -0.72878  
Si -3.56631 -1.32424 1.65298  
Si -3.80634 2.12619 -0.35039  
Al -1.46941 -0.01441 -0.46150  
N -2.16302 -1.40800 0.51369  
N -2.05607 1.71408 -0.21511  
N 4.34711 0.80863 0.55520  
N 4.75229 -1.16397 -0.25571  
O -0.78245 -0.43056 -2.04125  
O 1.07056 -1.19989 -3.02496  
C -1.58895 -2.72001 0.26427  
C -1.94854 -3.47056 -0.90038  
C -1.37386 -4.74306 -1.09225  
H -1.65011 -5.31702 -1.98386  
C -0.46679 -5.29061 -0.17992  
H -0.03879 -6.28425 -0.35165  
C -0.11574 -4.55241 0.95523  
H 0.59359 -4.97518 1.67671  
C -0.65746 -3.27528 1.19812  
C -2.94366 -2.97235 -1.95345  
H -3.20563 -1.93029 -1.69485  
C -2.34281 -2.97054 -3.37771  
H -1.41773 -2.37681 -3.42471  
H -3.06825 -2.53968 -4.09099  
H -2.12076 -3.99735 -3.71970  
C -4.25092 -3.79962 -1.93665  
H -4.05121 -4.85847 -2.17977  
H -4.96191 -3.41297 -2.68828  
H -4.74756 -3.77385 -0.95288  
C -0.22988 -2.53579 2.46863  
H -0.77558 -1.57838 2.48756  
C 1.27664 -2.19963 2.46588  
H 1.89426 -3.11536 2.44568

H 1.54951 -1.63070 3.37322  
H 1.54817 -1.59083 1.58296  
C -0.59553 -3.32411 3.74723  
H -1.67253 -3.55758 3.79242  
H -0.33254 -2.74478 4.65060  
H -0.04848 -4.28233 3.79868  
C -4.23904 -3.07815 1.95420  
H -4.76274 -3.47910 1.07196  
H -4.95979 -3.04664 2.79016  
H -3.43967 -3.78902 2.21678  
C -3.14668 -0.58533 3.36272  
H -2.54852 -1.27907 3.97469  
H -4.08819 -0.38727 3.90662  
H -2.59688 0.36594 3.29052  
C -4.99649 -0.27773 0.93131  
H -5.20993 -0.62380 -0.09788  
H -5.87668 -0.59516 1.52866  
C -4.86832 1.26400 0.98482  
H -4.51998 1.59265 1.98245  
H -5.87146 1.72426 0.86304  
C -4.48674 1.57464 -2.04553  
H -4.03971 2.15325 -2.86981  
H -5.58224 1.71030 -2.08712  
H -4.28019 0.50779 -2.24311  
C -4.03316 3.99969 -0.12332  
H -3.78672 4.30976 0.90576  
H -5.08628 4.26869 -0.31616  
H -3.39828 4.58417 -0.80746  
C -1.10800 2.80742 -0.16127  
C -0.59800 3.41842 -1.35116  
C 0.27503 4.51971 -1.23265  
H 0.65090 4.99476 -2.14613  
C 0.66339 5.02529 0.01264  
H 1.32486 5.89670 0.07666  
C 0.18082 4.41235 1.17588  
H 0.47396 4.80667 2.15606  
C -0.70048 3.31617 1.11399  
C -0.97154 2.94503 -2.75776  
H -1.57832 2.03100 -2.65078  
C 0.27417 2.57384 -3.59301  
H 0.91308 3.45515 -3.78376  
H -0.03145 2.16520 -4.57156  
H 0.88340 1.80757 -3.08874  
C -1.81501 4.00207 -3.50897  
H -2.74014 4.25814 -2.96564  
H -2.09966 3.62848 -4.50861  
H -1.24608 4.93817 -3.65334  
C -1.19491 2.68684 2.41508  
H -2.02927 2.02068 2.13779  
C -0.09432 1.81145 3.05642  
H 0.25785 1.03203 2.35726  
H -0.46571 1.30846 3.96711  
H 0.77830 2.42499 3.34288  
C -1.72802 3.71908 3.43100  
H -0.92790 4.38002 3.80936  
H -2.16582 3.20545 4.30501  
H -2.50716 4.36120 2.98660  
C 3.74123 -0.25603 -0.06441  
C 3.59334 2.06743 0.80192  
H 2.54740 1.77314 0.59694  
C 3.67775 2.54335 2.25913  
H 3.44972 1.72440 2.96046  
H 2.93059 3.33992 2.40783  
H 4.66451 2.96305 2.51266  
C 3.98250 3.15246 -0.21498  
H 3.90817 2.76262 -1.24286  
H 5.00712 3.52902 -0.05390  
H 3.28447 4.00000 -0.12157  
C 5.71819 0.57965 0.74487  
C 6.67410 1.51992 1.41373  
H 6.63407 2.53571 0.98649  
H 7.70474 1.15381 1.28635

H 6.48798 1.60708 2.49864  
C 5.97153 -0.67593 0.22890  
C 7.25604 -1.44344 0.17111  
H 7.54516 -1.69731 -0.86427  
H 7.20558 -2.38675 0.74438  
H 8.07283 -0.84435 0.60187  
C 4.60758 -2.45110 -0.99543  
H 5.57085 -2.96746 -0.84488  
C 3.49902 -3.32453 -0.39467  
H 3.67063 -3.50805 0.67824  
H 3.47340 -4.29416 -0.91860  
H 2.50754 -2.85392 -0.51426  
C 4.41226 -2.19662 -2.50015  
H 3.42813 -1.73826 -2.70340  
H 4.45607 -3.15643 -3.04239  
H 5.20509 -1.54036 -2.89751  
C 0.55324 -0.70596 -2.01166

**SCu**

SCF (BP86) Energy = -2219.69501398  
Enthalpy 0K = -2218.609133  
Enthalpy 298K = -2218.608189  
Free Energy 298K = -2218.783086  
Lowest Frequency = 5.2966 cm<sup>-1</sup>  
Second Frequency = 10.1637 cm<sup>-1</sup>  
SCF (BP86-D3BJ) Energy = -2220.00288130  
SCF (C6H6) Energy = -2219.70253794  
SCF (BS2) Energy = -3031.87939786

Cu 2.65331 -0.16598 -0.08707  
Si -4.16667 -1.50642 1.16516  
Si -4.05427 1.82104 -1.02515  
Al -1.55442 0.02393 -0.00076  
N -2.52880 -1.48426 0.43251  
N -2.38888 1.62656 -0.38606  
N 5.38112 0.64757 0.64091  
N 5.42326 -1.01691 -0.75196  
O 0.06467 0.28920 0.99679  
O -0.02053 -0.39745 -1.08098  
C -1.84656 -2.74767 0.24550  
C -1.93285 -3.42648 -1.01189  
C -1.27363 -4.65878 -1.18064  
H -1.34496 -5.17112 -2.14755  
C -0.53646 -5.24291 -0.14475  
H -0.03916 -6.20825 -0.29133  
C -0.44441 -4.57577 1.08117  
H 0.13398 -5.02628 1.89673  
C -1.07794 -3.33572 1.30039  
C -2.70180 -2.84348 -2.19800  
H -3.19849 -1.92707 -1.83362  
C -1.74289 -2.44022 -3.34273  
H -0.97001 -1.74045 -2.98621  
H -2.30013 -1.96045 -4.16773  
H -1.23088 -3.32731 -3.75823  
C -3.79842 -3.79780 -2.72024  
H -3.36599 -4.73085 -3.12378  
H -4.37057 -3.32013 -3.53545  
H -4.50845 -4.07912 -1.92419  
C -0.91741 -2.67641 2.67279  
H -1.41022 -1.69103 2.62071  
C 0.56591 -2.43567 3.03459  
H 1.12370 -3.38624 3.11436  
H 0.64285 -1.92272 4.01007  
H 1.05906 -1.80342 2.27921  
C -1.60491 -3.50189 3.78546  
H -2.67771 -3.65489 3.58096  
H -1.51291 -2.99321 4.76208  
H -1.14174 -4.50012 3.88489  
C -4.78869 -3.30253 1.27454  
H -4.99014 -3.71942 0.27380  
H -5.73041 -3.33386 1.84999  
H -4.06229 -3.96726 1.76840

C -4.17091 -0.74183 2.91518  
H -3.61468 -1.36779 3.63189  
H -5.20627 -0.63987 3.28716  
H -3.71385 0.26237 2.92430  
C -5.45146 -0.54553 0.12176  
H -5.44427 -0.95676 -0.90584  
H -6.42741 -0.85779 0.54988  
C -5.37158 0.99934 0.09368  
H -5.26303 1.40521 1.11770  
H -6.33240 1.41265 -0.27947  
C -4.23476 1.06071 -2.76773  
H -3.66258 1.63001 -3.51839  
H -5.29473 1.05966 -3.07945  
H -3.87797 0.01707 -2.79762  
C -4.49084 3.67213 -1.10982  
H -4.59199 4.10734 -0.10176  
H -5.45458 3.80129 -1.63275  
H -3.72765 4.25774 -1.64640  
C -1.57305 2.81317 -0.23552  
C -0.81258 3.33083 -1.33247  
C -0.04947 4.50182 -1.14916  
H 0.52176 4.89970 -1.99656  
C -0.00495 5.16653 0.08075  
H 0.59038 6.07890 0.19869  
C -0.73284 4.64861 1.15760  
H -0.69781 5.15862 2.12782  
C -1.51703 3.48692 1.02632  
C -0.79399 2.66649 -2.71155  
H -1.37982 1.73527 -2.63293  
C 0.63651 2.27969 -3.15080  
H 1.28058 3.17032 -3.26514  
H 0.61011 1.76143 -4.12610  
H 1.10407 1.60268 -2.41839  
C -1.45269 3.56190 -3.78681  
H -2.49250 3.82085 -3.52624  
H -1.46374 3.05093 -4.76648  
H -0.89738 4.50899 -3.91152  
C -2.26714 2.97290 2.25546  
H -2.85799 2.10118 1.92330  
C -1.28682 2.49309 3.35128  
H -0.59433 1.73121 2.95875  
H -1.83861 2.06155 4.20601  
H -0.68312 3.33520 3.73626  
C -3.25057 4.01780 2.82772  
H -2.72020 4.91397 3.19671  
H -3.81413 3.59417 3.67807  
H -3.97809 4.35265 2.06916  
C 4.56520 -0.19322 -0.07393  
C 4.79579 1.72738 1.48423  
H 3.71091 1.51800 1.42401  
C 5.21568 1.61577 2.95762  
H 5.06119 0.59235 3.33609  
H 4.59303 2.29821 3.55921  
H 6.26802 1.89956 3.12082  
C 5.03710 3.11873 0.87776  
H 4.70514 3.14915 -0.17234  
H 6.09711 3.42001 0.92174  
H 4.45474 3.86619 1.44124  
C 6.73509 0.36008 0.41217  
C 7.89363 1.06835 1.04538  
H 7.83295 2.16292 0.92813  
H 8.83251 0.74195 0.57197  
H 7.97846 0.85254 2.12479  
C 6.75791 -0.70121 -0.47326  
C 7.92363 -1.43280 -1.06270  
H 7.93191 -1.38493 -2.16628  
H 7.93719 -2.49918 -0.77397  
H 8.86627 -0.98828 -0.70902  
C 4.97313 -2.10657 -1.66151  
H 5.90220 -2.57331 -2.02975  
C 4.16451 -3.16249 -0.89117  
H 4.73386 -3.55657 -0.03334

H 3.91343 -4.00154 -1.56076  
H 3.21958 -2.73254 -0.51462  
C 4.20160 -1.53292 -2.86093  
H 3.25895 -1.06379 -2.52825  
H 3.95013 -2.34367 -3.56456  
H 4.79787 -0.77604 -3.39666  
C 0.75524 -0.08929 -0.06108

**TS (S-E)<sub>cu</sub>**

SCF (BP86) Energy = -2219.63255726  
Enthalpy 0K = -2218.548927  
Enthalpy 298K = -2218.547983  
Free Energy 298K = -2218.721122  
Lowest Frequency = -186.5620 cm<sup>-1</sup>  
Second Frequency = 8.3311 cm<sup>-1</sup>  
SCF (BP86-D3BJ) Energy = -2219.95402622  
SCF (C6H6) Energy = -2219.63803473  
SCF (BS2) Energy = -3031.82201944

Cu 2.48199 -0.29072 -0.98686  
Si -3.33873 -1.75167 1.88328  
Al -1.34290 -0.04120 -0.04760  
Si -4.16835 1.55536 -0.41396  
N -2.11433 -1.61048 0.57523  
N -2.39610 1.48576 -0.10648  
O 0.31297 -1.30717 -2.85963  
N 4.54151 1.42152 0.29467  
O 0.30506 0.02671 -0.53947  
N 5.24496 -0.60030 -0.07077  
C 1.08125 -0.89868 -2.07308  
C 4.13985 0.20905 -0.19946  
C 6.32552 0.09775 0.48972  
C -0.40503 -3.45188 0.65646  
C -1.53053 -2.82533 0.03457  
C 5.87435 1.38291 0.71914  
C -1.23324 3.45693 -1.14706  
C -1.69257 2.74779 0.00675  
C -2.07355 -3.40413 -1.15800  
C -1.41275 2.92267 -2.56773  
H -2.02325 2.00783 -2.49657  
C 0.21067 -2.93902 1.95854  
H -0.37835 -2.06334 2.27635  
C -1.45282 3.30811 1.30351  
C 0.13591 -4.00490 3.07653  
H -0.89355 -4.37369 3.22204  
H 0.49326 -3.59093 4.03647  
H 0.76605 -4.88047 2.83811  
C -2.62855 -1.66648 3.65598  
H -2.06614 -2.56882 3.94216  
H -3.46678 -1.55569 4.36818  
H -1.96572 -0.79432 3.78633  
C 3.66701 2.62691 0.34470  
H 4.26953 3.39211 0.86320  
C -4.25741 -3.40992 1.71005  
H -4.94357 -3.40369 0.84731  
H -4.85704 -3.59819 2.61772  
H -3.55937 -4.25296 1.58056  
C 0.16366 -4.59654 0.06263  
H 1.02948 -5.06802 0.54300  
C -4.62198 -0.33627 1.80001  
H -5.47527 -0.72765 2.39172  
H -4.25380 0.53227 2.37804  
C -0.05415 2.52371 -3.18648  
H 0.60599 3.40332 -3.29648  
H -0.19603 2.08165 -4.18879  
H 0.45088 1.78408 -2.54519  
C -4.85778 3.17053 0.32312  
H -4.80234 3.17000 1.42462  
H -5.91838 3.28449 0.03823  
H -4.30982 4.05457 -0.04091  
C -1.87699 2.58255 2.58027  
H -2.60260 1.80850 2.27785



|   |          |          |          |
|---|----------|----------|----------|
| C | 7.67110  | -0.48407 | 0.79987  |
| H | 7.63625  | -1.19939 | 1.64041  |
| H | 8.36602  | 0.32101  | 1.08509  |
| H | 8.11575  | -1.00665 | -0.06338 |
| C | -0.34887 | -5.14459 | -1.11733 |
| H | 0.11116  | -6.03235 | -1.56492 |
| C | -0.56090 | 4.68483  | -0.98039 |
| H | -0.21332 | 5.22186  | -1.87082 |
| C | -4.64841 | 1.48778  | -2.26083 |
| H | -4.38907 | 2.40583  | -2.81065 |
| H | -5.74177 | 1.34689  | -2.34202 |
| H | -4.16556 | 0.63601  | -2.76968 |
| C | 6.58988  | 2.55732  | 1.31115  |
| H | 6.62089  | 3.41860  | 0.62024  |
| H | 7.63097  | 2.28679  | 1.54474  |
| H | 6.12246  | 2.90090  | 2.25155  |
| C | 1.66884  | -2.46804 | 1.76750  |
| H | 2.31664  | -3.29956 | 1.43496  |
| H | 2.08043  | -2.07958 | 2.71713  |
| H | 1.71877  | -1.66369 | 1.01219  |
| C | -1.46456 | -4.54669 | -1.71165 |
| H | -1.87797 | -4.97497 | -2.63199 |
| C | -0.77690 | 4.53836  | 1.41600  |
| H | -0.60273 | 4.96161  | 2.41191  |
| C | -5.08850 | 0.08497  | 0.38955  |
| H | -6.14409 | 0.42634  | 0.41405  |
| H | -5.08528 | -0.77362 | -0.30770 |
| C | -0.33173 | 5.23411  | 0.28552  |
| H | 0.18130  | 6.19660  | 0.39065  |
| C | 3.35638  | 3.12643  | -1.07490 |
| H | 2.78635  | 2.36540  | -1.63453 |
| H | 4.27966  | 3.35475  | -1.63384 |
| H | 2.73659  | 4.03611  | -1.02059 |
| C | -3.30009 | -2.82374 | -1.86475 |
| H | -3.70816 | -2.04202 | -1.20176 |
| C | -0.67010 | 1.85943  | 3.22180  |
| H | -0.20536 | 1.14337  | 2.51997  |
| H | -0.97383 | 1.30584  | 4.12854  |
| H | 0.11113  | 2.58400  | 3.51383  |
| C | -2.56493 | 3.50200  | 3.61112  |
| H | -1.86661 | 4.24571  | 4.03472  |
| H | -2.95414 | 2.90628  | 4.45549  |
| H | -3.40785 | 4.05396  | 3.16256  |
| C | -2.14997 | 3.92680  | -3.48189 |
| H | -3.11135 | 4.25043  | -3.04779 |
| H | -2.35228 | 3.47466  | -4.46890 |
| H | -1.54577 | 4.83533  | -3.65518 |
| C | -2.92846 | -2.15382 | -3.20703 |
| H | -2.49846 | -2.88986 | -3.90966 |
| H | -2.17488 | -1.36069 | -3.07645 |
| H | -3.82388 | -1.71641 | -3.68466 |
| C | 2.40073  | 2.35629  | 1.16801  |
| H | 1.81794  | 3.28730  | 1.26270  |
| H | 2.65838  | 1.99628  | 2.17823  |
| H | 1.75111  | 1.60842  | 0.67761  |
| C | -4.40382 | -3.88164 | -2.09106 |
| H | -5.31368 | -3.40650 | -2.49906 |
| H | -4.67425 | -4.39800 | -1.15530 |
| H | -4.08594 | -4.65224 | -2.81575 |
| C | 5.22155  | -1.99922 | -0.57474 |
| H | 4.15910  | -2.13504 | -0.85210 |
| C | 5.56599  | -3.02872 | 0.51206  |
| H | 6.63507  | -3.02124 | 0.77944  |
| H | 5.32833  | -4.03826 | 0.13748  |
| H | 4.97074  | -2.85468 | 1.42272  |
| C | 6.05965  | -2.15284 | -1.85453 |
| H | 5.75228  | -1.41153 | -2.60965 |
| H | 5.90165  | -3.15931 | -2.27669 |
| H | 7.14038  | -2.03685 | -1.66739 |

**E<sub>Cu</sub>**  
SCF (BP86) Energy = -2219.65120583

Enthalpy 0K = -2218.566535  
Enthalpy 298K = -2218.565591  
Free Energy 298K = -2218.741088  
Lowest Frequency = 9.2641 cm<sup>-1</sup>  
Second Frequency = 14.9714 cm<sup>-1</sup>  
SCF (BP86-D3BJ) Energy = -2219.97805876  
SCF (C6H6) Energy = -2219.65550997  
SCF (BS2) Energy = -3031.84368962

|    |          |          |          |
|----|----------|----------|----------|
| Cu | 1.91959  | -0.33279 | 1.04204  |
| Si | -2.86120 | 2.79438  | -1.37679 |
| Al | -1.29464 | 0.20585  | -0.04038 |
| Si | -4.44039 | -0.48928 | 0.64853  |
| N  | -1.51714 | 1.99171  | -0.50078 |
| N  | -2.76378 | -0.91011 | 0.16795  |
| O  | 2.41612  | 0.27594  | 3.91686  |
| N  | 3.86534  | -2.10054 | -0.50316 |
| O  | 0.27068  | -0.43870 | 0.10315  |
| N  | 4.72554  | -0.16493 | -0.04117 |
| C  | 2.10398  | 0.11387  | 2.80592  |
| C  | 3.56947  | -0.89963 | 0.08567  |
| C  | 5.73279  | -0.89697 | -0.69191 |
| C  | 0.69246  | 3.07318  | -1.00017 |
| C  | -0.38978 | 2.81072  | -0.10381 |
| C  | 5.17978  | -2.12554 | -0.98769 |
| C  | -2.15327 | -3.21800 | 0.95179  |
| C  | -2.47058 | -2.30504 | -0.10130 |
| C  | -0.34514 | 3.35067  | 1.22240  |
| C  | -2.09266 | -2.78559 | 2.41686  |
| H  | -2.50586 | -1.76635 | 2.47008  |
| C  | 0.72964  | 2.50752  | -2.41997 |
| H  | -0.26805 | 2.08837  | -2.62387 |
| C  | -2.48375 | -2.77988 | -1.45257 |
| C  | 1.02523  | 3.58871  | -3.48228 |
| H  | 0.34036  | 4.44970  | -3.39724 |
| H  | 0.92389  | 3.16793  | -4.49822 |
| H  | 2.05538  | 3.97827  | -3.39307 |
| C  | -2.60285 | 3.00430  | -3.25871 |
| H  | -1.80372 | 3.71900  | -3.51051 |
| H  | -3.54171 | 3.38853  | -3.69815 |
| H  | -2.37350 | 2.04494  | -3.75315 |
| C  | 2.90837  | -3.23681 | -0.62540 |
| H  | 3.49181  | -4.04485 | -1.09886 |
| C  | -3.14531 | 4.53418  | -0.65167 |
| H  | -3.57764 | 4.49056  | 0.36193  |
| H  | -3.84423 | 5.09873  | -1.29324 |
| H  | -2.20388 | 5.10472  | -0.59212 |
| C  | 1.78113  | 3.84895  | -0.55280 |
| H  | 2.60692  | 4.05119  | -1.24479 |
| C  | -4.46695 | 1.78392  | -1.20256 |
| H  | -5.24953 | 2.45795  | -1.60602 |
| H  | -4.44200 | 0.92876  | -1.90508 |
| C  | -0.63282 | -2.70717 | 2.91602  |
| H  | -0.14530 | -3.69811 | 2.87737  |
| H  | -0.59544 | -2.35287 | 3.96226  |
| H  | -0.05501 | -2.01091 | 2.28487  |
| C  | -5.66376 | -1.60664 | -0.29157 |
| H  | -5.67939 | -1.37729 | -1.37018 |
| H  | -6.68542 | -1.46152 | 0.10072  |
| H  | -5.40409 | -2.67188 | -0.17802 |
| C  | -2.78763 | -1.84553 | -2.62450 |
| H  | -3.26627 | -0.94699 | -2.19769 |
| C  | 7.11100  | -0.39941 | -1.00658 |
| H  | 7.11355  | 0.36421  | -1.80409 |
| H  | 7.73559  | -1.23726 | -1.35392 |
| H  | 7.61367  | 0.03652  | -0.12679 |
| C  | 1.83054  | 4.36815  | 0.74600  |
| H  | 2.68162  | 4.97796  | 1.06981  |
| C  | -1.84705 | -4.55642 | 0.63416  |
| H  | -1.59895 | -5.25035 | 1.44583  |
| C  | -4.82811 | -0.65509 | 2.51320  |
| H  | -4.84942 | -1.69889 | 2.86321  |

|   |          |          |          |    |          |          |          |
|---|----------|----------|----------|----|----------|----------|----------|
| H | -5.82769 | -0.22191 | 2.70122  | Si | -3.08494 | 2.00324  | -1.58878 |
| H | -4.10445 | -0.09987 | 3.13434  | Si | -3.93698 | -1.44567 | 0.35222  |
| C | 5.78378  | -3.29999 | -1.69352 | Al | -1.14293 | 0.31421  | 0.37506  |
| H | 5.80029  | -4.20608 | -1.06155 | N  | -1.45434 | 1.72872  | -0.86942 |
| H | 6.82482  | -3.07698 | -1.97363 | N  | -2.15813 | -1.28853 | 0.09875  |
| H | 5.24231  | -3.55200 | -2.62298 | N  | 3.50965  | -1.72198 | -0.79668 |
| C | 1.73821  | 1.34224  | -2.53336 | N  | 4.24657  | 0.27950  | -0.39478 |
| H | 2.76868  | 1.69550  | -2.34393 | N  | -1.01276 | 0.79059  | 2.24800  |
| H | 1.71652  | 0.90752  | -3.54951 | N  | 1.40929  | 0.47837  | 2.79988  |
| H | 1.50045  | 0.55392  | -1.79940 | C  | -0.48292 | 2.73462  | -1.26365 |
| C | 0.76856  | 4.11340  | 1.62267  | C  | -0.28636 | 3.92876  | -0.48612 |
| H | 0.79992  | 4.52290  | 2.63846  | C  | 0.59336  | 4.93246  | -0.93797 |
| C | -2.16840 | -4.12632 | -1.71717 | H  | 0.71899  | 5.83502  | -0.32873 |
| H | -2.17663 | -4.48261 | -2.75355 | C  | 1.29106  | 4.81689  | -2.14242 |
| C | -4.82162 | 1.33160  | 0.23329  | H  | 1.95721  | 5.61632  | -2.48496 |
| H | -5.91202 | 1.42014  | 0.41415  | C  | 1.11943  | 3.65508  | -2.89779 |
| H | -4.35596 | 1.98701  | 0.99451  | H  | 1.66546  | 3.54512  | -3.84188 |
| C | -1.85042 | -5.01837 | -0.68633 | C  | 0.25824  | 2.61472  | -2.48874 |
| H | -1.61503 | -6.06483 | -0.91004 | C  | -0.98705 | 4.18015  | 0.84748  |
| C | 2.46200  | -3.71834 | 0.76250  | H  | -1.72938 | 3.37394  | 0.97059  |
| H | 1.89193  | -2.93018 | 1.28184  | C  | 0.02366  | 4.09877  | 2.01378  |
| H | 3.32567  | -4.00042 | 1.38823  | H  | 0.53574  | 3.12506  | 2.03870  |
| H | 1.79848  | -4.59204 | 0.65620  | H  | -0.48273 | 4.25089  | 2.98471  |
| C | -1.46571 | 3.07580  | 2.22643  | H  | 0.79261  | 4.88647  | 1.91633  |
| H | -2.34736 | 2.76815  | 1.63837  | C  | -1.71655 | 5.54253  | 0.91221  |
| C | -1.48048 | -1.39030 | -3.31526 | H  | -1.00064 | 6.38370  | 0.92944  |
| H | -0.77802 | -0.92471 | -2.59992 | H  | -2.31448 | 5.61123  | 1.83896  |
| H | -1.68894 | -0.66209 | -4.11981 | H  | -2.39066 | 5.69784  | 0.05630  |
| H | -0.95582 | -2.25276 | -3.76430 | C  | 0.19756  | 1.38792  | -3.39990 |
| C | -3.76193 | -2.45178 | -3.65602 | H  | -0.59824 | 0.72817  | -3.01612 |
| H | -3.31743 | -3.30911 | -4.19212 | C  | 1.53642  | 0.61647  | -3.34710 |
| H | -4.03006 | -1.69840 | -4.41766 | H  | 2.37612  | 1.27337  | -3.63877 |
| H | -4.69138 | -2.80189 | -3.17662 | H  | 1.52728  | -0.23854 | -4.04582 |
| C | -2.93204 | -3.69662 | 3.33925  | H  | 1.73673  | 0.23983  | -2.33027 |
| H | -3.97132 | -3.79724 | 2.98240  | C  | -0.12300 | 1.75277  | -4.86839 |
| H | -2.95822 | -3.28845 | 4.36506  | H  | -1.00185 | 2.41210  | -4.95290 |
| H | -2.50704 | -4.71421 | 3.40400  | H  | -0.31970 | 0.84023  | -5.45850 |
| C | -1.09746 | 1.89162  | 3.15005  | H  | 0.72463  | 2.27308  | -5.34931 |
| H | -0.21882 | 2.13756  | 3.77238  | C  | -3.47248 | 3.86601  | -1.73921 |
| H | -0.83714 | 0.98491  | 2.57112  | H  | -3.73519 | 4.30400  | -0.76292 |
| H | -1.93416 | 1.63787  | 3.82551  | H  | -4.34472 | 3.98889  | -2.40576 |
| C | 1.73050  | -2.86768 | -1.53853 | H  | -2.63662 | 4.44374  | -2.16439 |
| H | 1.07312  | -3.74428 | -1.66426 | C  | -3.35340 | 1.32034  | -3.35402 |
| H | 2.09168  | -2.55618 | -2.53355 | H  | -2.81099 | 1.91911  | -4.10205 |
| H | 1.13197  | -2.04990 | -1.09582 | H  | -4.43024 | 1.39438  | -3.59316 |
| C | -1.86343 | 4.30945  | 3.06245  | H  | -3.05472 | 0.26854  | -3.47857 |
| H | -2.74741 | 4.08019  | 3.68317  | C  | -4.50149 | 1.28682  | -0.51277 |
| H | -2.10993 | 5.17045  | 2.41890  | H  | -4.32068 | 1.51765  | 0.55545  |
| H | -1.05875 | 4.62255  | 3.75125  | H  | -5.35341 | 1.94047  | -0.79302 |
| C | 4.83515  | 1.19420  | 0.55054  | C  | -4.89869 | -0.19500 | -0.71724 |
| H | 3.78784  | 1.44517  | 0.79690  | H  | -4.81734 | -0.47669 | -1.78304 |
| C | 5.34042  | 2.24996  | -0.44545 | H  | -5.96521 | -0.34357 | -0.45059 |
| H | 6.42399  | 2.17627  | -0.62976 | C  | -4.55082 | -1.14543 | 2.13873  |
| H | 5.14260  | 3.25125  | -0.02937 | H  | -4.05850 | -1.81557 | 2.86122  |
| H | 4.80971  | 2.17335  | -1.40779 | H  | -5.63360 | -1.36643 | 2.16612  |
| C | 5.64670  | 1.16824  | 1.85691  | H  | -4.42195 | -0.11019 | 2.48750  |
| H | 5.23195  | 0.43013  | 2.56146  | C  | -4.54847 | -3.21440 | -0.02342 |
| H | 5.61019  | 2.16105  | 2.33584  | H  | -4.24201 | -3.60555 | -1.00352 |
| H | 6.70730  | 0.92176  | 1.67916  | H  | -5.65256 | -3.21256 | 0.01922  |

### III<sub>Cu,N</sub>

SCF (BP86) Energy = -2415.71340402  
 Enthalpy 0K = -2414.430660  
 Enthalpy 298K = -2414.429716  
 Free Energy 298K = -2414.611371  
 Lowest Frequency = 23.7273 cm<sup>-1</sup>  
 Second Frequency = 26.4390 cm<sup>-1</sup>  
 SCF (BP86-D3BJ) Energy = -2416.11252107  
 SCF (C6H6) Energy = -2415.71680398  
 SCF (BS2) Energy = -3227.93059301  
  
 Cu 1.48513 -0.07033 0.66760

|   |          |          |          |
|---|----------|----------|----------|
| H | 0.68198  | -4.06117 | 2.95505  |
| H | 0.18702  | -2.73933 | 4.03983  |
| H | 0.92872  | -2.35703 | 2.46396  |
| C | -2.12045 | -3.92135 | 3.16486  |
| H | -3.13765 | -3.93994 | 2.74025  |
| H | -2.19153 | -3.55571 | 4.20498  |
| H | -1.76080 | -4.96525 | 3.20571  |
| C | -1.88161 | -2.20155 | -2.74011 |
| H | -2.04873 | -1.18216 | -2.35154 |
| C | -0.74473 | -2.14355 | -3.78270 |
| H | 0.20510  | -1.83397 | -3.32153 |
| H | -0.99058 | -1.42240 | -4.58220 |
| H | -0.58393 | -3.12479 | -4.26458 |
| C | -3.17774 | -2.67464 | -3.43908 |
| H | -3.08497 | -3.72242 | -3.77783 |
| H | -3.38219 | -2.05480 | -4.33051 |
| H | -4.05708 | -2.61082 | -2.77999 |
| C | 3.13342  | -0.51613 | -0.25220 |
| C | 2.60177  | -2.89964 | -0.77955 |
| H | 1.62018  | -2.46319 | -0.51838 |
| C | 2.47517  | -3.57229 | -2.15504 |
| H | 2.33887  | -2.82522 | -2.95342 |
| H | 1.58467  | -4.21943 | -2.14147 |
| H | 3.34642  | -4.19989 | -2.40110 |
| C | 2.99977  | -3.88474 | 0.33142  |
| H | 3.05839  | -3.37287 | 1.30519  |
| H | 3.97217  | -4.36594 | 0.12862  |
| H | 2.23354  | -4.67341 | 0.40204  |
| C | 4.83362  | -1.68941 | -1.25978 |
| C | 5.56442  | -2.82199 | -1.91513 |
| H | 5.48951  | -3.75897 | -1.33895 |
| H | 6.63431  | -2.57279 | -1.99331 |
| H | 5.19831  | -3.02820 | -2.93572 |
| C | 5.29684  | -0.41655 | -1.00535 |
| C | 6.62802  | 0.19568  | -1.31488 |
| H | 7.12791  | 0.59524  | -0.41485 |
| H | 6.54676  | 1.02192  | -2.04453 |
| H | 7.29697  | -0.56008 | -1.75406 |
| C | 4.43233  | 1.64607  | 0.16504  |
| H | 5.22872  | 2.09674  | -0.45280 |
| C | 3.18361  | 2.51721  | 0.03035  |
| H | 2.81567  | 2.55957  | -1.00551 |
| H | 3.42785  | 3.54343  | 0.35053  |
| H | 2.36658  | 2.15500  | 0.67726  |
| C | 4.92307  | 1.54262  | 1.61958  |
| H | 4.13601  | 1.08232  | 2.23914  |
| H | 5.14274  | 2.54794  | 2.01695  |
| H | 5.83887  | 0.93231  | 1.69835  |
| C | 0.30500  | 0.50064  | 2.10259  |
| C | 1.63430  | 0.65968  | 4.24844  |
| H | 0.69749  | 0.47949  | 4.81132  |
| C | -1.57185 | 1.24251  | 3.54694  |
| H | -0.79241 | 1.85493  | 4.04239  |
| C | 2.11216  | 2.09015  | 4.56483  |
| H | 3.04102  | 2.31773  | 4.01451  |
| H | 1.35733  | 2.84022  | 4.27835  |
| H | 2.31618  | 2.20001  | 5.64494  |
| C | 2.67059  | -0.37734 | 4.71798  |
| H | 3.62990  | -0.22912 | 4.19208  |
| H | 2.85324  | -0.28476 | 5.80306  |
| H | 2.32345  | -1.40159 | 4.50771  |
| C | -1.91131 | 0.06173  | 4.47992  |
| H | -1.05280 | -0.61935 | 4.59718  |
| H | -2.19407 | 0.43355  | 5.48121  |
| H | -2.75512 | -0.52330 | 4.08320  |
| C | -2.79894 | 2.14352  | 3.34580  |
| H | -3.23215 | 2.41852  | 4.32288  |
| H | -2.54160 | 3.07003  | 2.81239  |
| H | -3.58179 | 1.62584  | 2.76746  |

**TS (III-IV)<sub>Cu,N</sub>**

SCF (BP86) Energy = -2415.70873615

Enthalpy 0K = -2414.427238  
 Enthalpy 298K = -2414.426294  
 Free Energy 298K = -2414.607670  
 Lowest Frequency = -109.2456 cm<sup>-1</sup>  
 Second Frequency = 21.0041 cm<sup>-1</sup>  
 SCF (BP86-D3BJ) Energy = -2416.10340527  
 SCF (C6H6) Energy = -2415.71203388  
 SCF (BS2) Energy = -3227.92606068

|    |          |          |          |
|----|----------|----------|----------|
| Cu | 1.76064  | -0.08011 | 0.92263  |
| Si | -3.04399 | 2.02405  | -1.72054 |
| Si | -4.02635 | -1.42755 | 0.16317  |
| Al | -1.28955 | 0.33415  | 0.36861  |
| N  | -1.45814 | 1.72478  | -0.91395 |
| N  | -2.23725 | -1.28151 | -0.00212 |
| N  | 3.65280  | -1.70042 | -0.64858 |
| N  | 4.40531  | 0.30731  | -0.28902 |
| N  | -1.29600 | 0.80617  | 2.24176  |
| N  | 1.11336  | 0.35842  | 2.72914  |
| C  | -0.45505 | 2.72349  | -1.24087 |
| C  | -0.29783 | 3.91322  | -0.44889 |
| C  | 0.61054  | 4.91395  | -0.84766 |
| H  | 0.70628  | 5.81423  | -0.22978 |
| C  | 1.37479  | 4.79790  | -2.01104 |
| H  | 2.06184  | 5.59578  | -2.31357 |
| C  | 1.24415  | 3.63732  | -2.77651 |
| H  | 1.84430  | 3.52606  | -3.68695 |
| C  | 0.35668  | 2.60010  | -2.41945 |
| C  | -1.06095 | 4.15729  | 0.85149  |
| H  | -1.81354 | 3.35520  | 0.93661  |
| C  | -0.09885 | 4.05338  | 2.05599  |
| H  | 0.41164  | 3.07875  | 2.07692  |
| H  | -0.64250 | 4.18471  | 3.00950  |
| H  | 0.67392  | 4.84162  | 2.00450  |
| C  | -1.78261 | 5.52411  | 0.89910  |
| H  | -1.06239 | 6.36022  | 0.94951  |
| H  | -2.41457 | 5.59022  | 1.80314  |
| H  | -2.42316 | 5.69032  | 0.01970  |
| C  | 0.34660  | 1.37088  | -3.32898 |
| H  | -0.47621 | 0.71728  | -2.99448 |
| C  | 1.67575  | 0.59357  | -3.18746 |
| H  | 2.53442  | 1.24371  | -3.43561 |
| H  | 1.70453  | -0.26835 | -3.87713 |
| H  | 1.81776  | 0.22708  | -2.15713 |
| C  | 0.12155  | 1.73160  | -4.81593 |
| H  | -0.75068 | 2.38970  | -4.95876 |
| H  | -0.03589 | 0.81737  | -5.41501 |
| H  | 0.99807  | 2.25127  | -5.24262 |
| C  | -3.40442 | 3.89141  | -1.87370 |
| H  | -3.71900 | 4.32232  | -0.90969 |
| H  | -4.23500 | 4.03043  | -2.58849 |
| H  | -2.53921 | 4.46414  | -2.24326 |
| C  | -3.21945 | 1.35748  | -3.50266 |
| H  | -2.62458 | 1.95237  | -4.21312 |
| H  | -4.27912 | 1.45053  | -3.80374 |
| H  | -2.93052 | 0.30183  | -3.61672 |
| C  | -4.51714 | 1.31002  | -0.72037 |
| H  | -4.38398 | 1.53146  | 0.35720  |
| H  | -5.34871 | 1.97446  | -1.03420 |
| C  | -4.91952 | -0.16688 | -0.95410 |
| H  | -4.78401 | -0.44450 | -2.01544 |
| H  | -6.00037 | -0.30389 | -0.74553 |
| C  | -4.69655 | -1.09243 | 1.92065  |
| H  | -4.26241 | -1.78122 | 2.66261  |
| H  | -5.79041 | -1.25007 | 1.91627  |
| H  | -4.51404 | -0.06269 | 2.26231  |
| C  | -4.63351 | -3.19119 | -0.23580 |
| H  | -4.29974 | -3.57651 | -1.20949 |
| H  | -5.73827 | -3.18605 | -0.22570 |
| H  | -4.29563 | -3.90798 | 0.53047  |
| C  | -1.61712 | -2.56153 | -0.26780 |
| C  | -1.23314 | -3.43633 | 0.80324  |

C -0.77154 -4.73687 0.51354  
 H -0.50467 -5.40041 1.34500  
 C -0.68700 -5.21453 -0.79829  
 H -0.35948 -6.24048 -0.99983  
 C -1.03703 -4.35763 -1.84787  
 H -0.97446 -4.72021 -2.88091  
 C -1.48063 -3.04056 -1.61485  
 C -1.35282 -3.04074 2.27566  
 H -1.71499 -1.99940 2.30556  
 C 0.01420 -3.09385 2.99211  
 H 0.42792 -4.11854 2.99746  
 H -0.09160 -2.77792 4.04591  
 H 0.74643 -2.42496 2.51099  
 C -2.36711 -3.93011 3.03269  
 H -3.36297 -3.91690 2.56036  
 H -2.48057 -3.58566 4.07630  
 H -2.03130 -4.98216 3.06595  
 C -1.81363 -2.17426 -2.83036  
 H -1.99254 -1.15501 -2.44662  
 C -0.63409 -2.12083 -3.82493  
 H 0.30089 -1.83205 -3.32156  
 H -0.83644 -1.38720 -4.62518  
 H -0.46800 -3.09852 -4.31205  
 C -3.08161 -2.63995 -3.58367  
 H -2.97885 -3.68773 -3.91945  
 H -3.24649 -2.01811 -4.48196  
 H -3.98715 -2.57339 -2.96142  
 C 3.29917 -0.49052 -0.09058  
 C 2.73353 -2.86660 -0.59904  
 H 1.76330 -2.41133 -0.32683  
 C 2.56873 -3.55686 -1.96143  
 H 2.42756 -2.81845 -2.76712  
 H 1.66912 -4.19066 -1.92280  
 H 3.42596 -4.20027 -2.21611  
 C 3.13213 -3.84259 0.51982  
 H 3.21177 -3.31708 1.48506  
 H 4.09517 -4.33972 0.30993  
 H 2.35719 -4.62104 0.61209  
 C 4.95808 -1.66846 -1.16518  
 C 5.66204 -2.80867 -1.83616  
 H 5.60898 -3.73836 -1.24519  
 H 6.72835 -2.56202 -1.95929  
 H 5.25617 -3.02833 -2.83890  
 C 5.43017 -0.39412 -0.93916  
 C 6.74528 0.21843 -1.30988  
 H 7.28580 0.62161 -0.43490  
 H 6.63078 1.04258 -2.03774  
 H 7.39471 -0.53786 -1.77673  
 C 4.60763 1.67060 0.26811  
 H 5.38618 2.12454 -0.36994  
 C 3.35485 2.54421 0.17157  
 H 2.95589 2.58571 -0.85298  
 H 3.60839 3.57079 0.48440  
 H 2.55584 2.17785 0.83979  
 C 5.14434 1.56980 1.70759  
 H 4.38740 1.09691 2.35499  
 H 5.36554 2.57548 2.10304  
 H 6.06769 0.96797 1.75600  
 C -0.00180 0.45696 2.02844  
 C 1.37468 0.53599 4.17118  
 H 0.44679 0.36037 4.74928  
 C -1.83123 1.25166 3.55401  
 H -1.02838 1.82512 4.05843  
 C 1.87691 1.95849 4.48531  
 H 2.78145 2.18328 3.89403  
 H 1.11841 2.72028 4.24468  
 H 2.13245 2.05232 5.55577  
 C 2.41439 -0.50986 4.61046  
 H 3.35105 -0.37717 4.04078  
 H 2.64349 -0.40697 5.68551  
 H 2.04887 -1.53230 4.42628  
 C -2.21429 0.06588 4.46250

H -1.37838 -0.64374 4.57522  
 H -2.49426 0.42867 5.46779  
 H -3.07230 -0.48543 4.04765  
 C -3.02533 2.19953 3.36675  
 H -3.41801 2.51517 4.34878  
 H -2.74271 3.10131 2.80355  
 H -3.84666 1.70322 2.82318

**IV<sub>Cu,N</sub>**

SCF (BP86) Energy = -2415.72601978  
 Enthalpy 0K = -2414.443752  
 Enthalpy 298K = -2414.442808  
 Free Energy 298K = -2414.628996  
 Lowest Frequency = 9.6389 cm<sup>-1</sup>  
 Second Frequency = 20.9427 cm<sup>-1</sup>  
 SCF (BP86-D3BJ) Energy = -2416.10990053  
 SCF (C6H6) Energy = -2415.73061383  
 SCF (BS2) Energy = -3227.94419156

Cu 2.52412 0.39326 0.94643  
 Si -3.69186 1.42112 -1.83366  
 Si -4.06204 -1.95496 0.35426  
 Al -1.64251 0.19507 0.39948  
 N -2.16304 1.48125 -0.89355  
 N -2.32006 -1.56841 0.15116  
 N 4.35855 -1.32340 -0.53109  
 N 5.12211 0.70824 -0.44949  
 N -1.40830 0.79451 2.22788  
 N 1.08388 0.78772 2.10538  
 C -1.28414 2.57962 -1.24916  
 C -1.39721 3.87024 -0.62845  
 C -0.56528 4.92675 -1.05128  
 H -0.66941 5.90489 -0.56759  
 C 0.38401 4.76432 -2.06293  
 H 1.01136 5.60391 -2.38219  
 C 0.51603 3.50635 -2.65593  
 H 1.26358 3.36018 -3.44429  
 C -0.29313 2.41770 -2.27456  
 C -2.34237 4.16596 0.53732  
 H -2.99340 3.28274 0.66197  
 C -1.51885 4.35403 1.83229  
 H -0.91886 3.45564 2.04126  
 H -2.17350 4.55207 2.69976  
 H -0.82947 5.21142 1.73101  
 C -3.22868 5.41428 0.32018  
 H -2.62624 6.34021 0.31560  
 H -3.95868 5.50975 1.14385  
 H -3.78526 5.37462 -0.62822  
 C -0.02193 1.07407 -2.94931  
 H -0.85165 0.39762 -2.68334  
 C 1.28693 0.47225 -2.39195  
 H 2.14250 1.13939 -2.60009  
 H 1.50851 -0.50872 -2.84958  
 H 1.23451 0.33839 -1.29531  
 C 0.05239 1.16922 -4.48904  
 H -0.84460 1.64981 -4.91308  
 H 0.14328 0.16268 -4.93248  
 H 0.92970 1.75203 -4.82229  
 C -4.40205 3.16633 -2.13500  
 H -4.86316 3.58205 -1.22480  
 H -5.18770 3.10002 -2.90853  
 H -3.63696 3.87468 -2.49095  
 C -3.53301 0.68181 -3.59043  
 H -2.92079 1.33515 -4.23395  
 H -4.53908 0.62286 -4.04425  
 H -3.09335 -0.32691 -3.61503  
 C -5.08936 0.48340 -0.91654  
 H -5.15127 0.86503 0.12164  
 H -5.99649 0.88823 -1.41209  
 C -5.13608 -1.06351 -0.95057  
 H -4.87832 -1.43644 -1.95889  
 H -6.17331 -1.41099 -0.76239

C -4.75389 -1.40593 2.04789  
 H -4.13768 -1.77820 2.88239  
 H -5.77525 -1.80866 2.17287  
 H -4.82129 -0.31022 2.13535  
 C -4.38305 -3.83342 0.26181  
 H -3.90970 -4.32725 -0.59914  
 H -5.47302 -4.00263 0.20238  
 H -4.01654 -4.34067 1.16921  
 C -1.48379 -2.73238 -0.03702  
 C -0.88504 -3.40562 1.07984  
 C -0.17745 -4.60809 0.87691  
 H 0.24844 -5.12311 1.74654  
 C -0.03963 -5.17976 -0.39222  
 H 0.48713 -6.13167 -0.52340  
 C -0.60100 -4.51675 -1.48910  
 H -0.50166 -4.95412 -2.48976  
 C -1.30670 -3.30577 -1.34306  
 C -1.01898 -2.90058 2.51682  
 H -1.52707 -1.92287 2.47341  
 C 0.36234 -2.69152 3.17516  
 H 0.92912 -3.63785 3.24236  
 H 0.24355 -2.31123 4.20560  
 H 0.96380 -1.96187 2.60899  
 C -1.87417 -3.85271 3.38516  
 H -2.88610 -3.99033 2.97033  
 H -1.97917 -3.45341 4.41012  
 H -1.40838 -4.85169 3.46320  
 C -1.87410 -2.65850 -2.60674  
 H -2.24665 -1.66454 -2.30490  
 C -0.79234 -2.46876 -3.69284  
 H 0.09281 -1.94771 -3.29651  
 H -1.19253 -1.87852 -4.53605  
 H -0.45618 -3.43765 -4.10392  
 C -3.05212 -3.45410 -3.21707  
 H -2.73426 -4.47557 -3.49446  
 H -3.41786 -2.95846 -4.13445  
 H -3.90169 -3.54501 -2.52338  
 C 4.05215 -0.06481 -0.07012  
 C 3.43563 -2.46890 -0.29370  
 H 2.52429 -1.97408 0.08999  
 C 3.06200 -3.21132 -1.58457  
 H 2.79823 -2.50282 -2.38627  
 H 2.17835 -3.83957 -1.38594  
 H 3.87072 -3.86859 -1.94338  
 C 3.96213 -3.39964 0.80976  
 H 4.18698 -2.83133 1.72680  
 H 4.87140 -3.94297 0.50070  
 H 3.18614 -4.14595 1.04637  
 C 5.60578 -1.34553 -1.17161  
 C 6.24047 -2.54875 -1.79993  
 H 6.24754 -3.41960 -1.12376  
 H 7.28817 -2.32504 -2.05476  
 H 5.73238 -2.85442 -2.73094  
 C 6.08923 -0.05379 -1.11771  
 C 7.36740 0.51299 -1.65337  
 H 7.97780 0.99004 -0.86582  
 H 7.19367 1.26627 -2.44331  
 H 7.97635 -0.28835 -2.09890  
 C 5.28428 2.15121 -0.12721  
 H 6.13171 2.48700 -0.74878  
 C 4.04786 2.96693 -0.52806  
 H 3.81046 2.83767 -1.59571  
 H 4.23641 4.03691 -0.33918  
 H 3.16016 2.66460 0.05502  
 C 5.66555 2.32947 1.35214  
 H 4.84421 1.98544 2.00269  
 H 5.85806 3.39355 1.56868  
 H 6.57155 1.75345 1.60493  
 C -0.17344 0.61294 1.66585  
 C 1.43065 1.29880 3.46286  
 H 0.55551 1.20995 4.12522  
 C -1.83031 1.26345 3.57166

H -1.16695 2.09371 3.88677  
 C 1.83748 2.78263 3.40240  
 H 2.71111 2.91282 2.73826  
 H 1.02147 3.40620 3.00435  
 H 2.10852 3.16057 4.40487  
 C 2.55741 0.44869 4.07661  
 H 3.45751 0.47583 3.43274  
 H 2.83900 0.83002 5.07425  
 H 2.24992 -0.60460 4.17770  
 C -1.75676 0.14172 4.62749  
 H -0.74239 -0.27961 4.71626  
 H -2.05918 0.52256 5.61945  
 H -2.44008 -0.68024 4.35440  
 C -3.26189 1.81939 3.51027  
 H -3.53110 2.28958 4.47215  
 H -3.36731 2.57158 2.71492  
 H -3.98459 1.00992 3.32008

**TS (IV-A)<sub>Cu,N</sub>**

SCF (BP86) Energy = -2415.69402965

Enthalpy 0K = -2414.413252

Enthalpy 298K = -2414.412308

Free Energy 298K = -2414.598944

Lowest Frequency = -58.4940 cm<sup>-1</sup>

Second Frequency = 9.6406 cm<sup>-1</sup>

SCF (BP86-D3BJ) Energy = -2416.07297025

SCF (C6H6) Energy = -2415.69927449

SCF (BS2) Energy = -3227.91262383

Cu -2.73720 -0.99697 -0.31013  
 Si 2.52678 3.36566 0.36052  
 Si 4.85836 0.35779 -0.85155  
 Al 1.66924 0.25244 -0.40226  
 N 1.32558 2.08255 -0.03236  
 N 3.42250 -0.40552 -0.08728  
 N -5.13404 -0.78438 1.35588  
 N -5.58350 -0.26543 -0.70287  
 N 0.77459 -0.54244 -1.99608  
 N -1.06754 -1.64060 -0.86685  
 C -0.04794 2.47397 0.22132  
 C -0.82186 3.16587 -0.77244  
 C -2.12269 3.60992 -0.46037  
 H -2.69203 4.15247 -1.22436  
 C -2.70129 3.38546 0.79195  
 H -3.70772 3.75523 1.01795  
 C -1.96631 2.68330 1.75130  
 H -2.40870 2.49758 2.73704  
 C -0.65791 2.22604 1.49747  
 C -0.32937 3.41347 -2.20086  
 H 0.72768 3.09578 -2.24234  
 C -1.14436 2.55207 -3.19300  
 H -1.11584 1.48662 -2.91879  
 H -0.76237 2.66166 -4.22358  
 H -2.20182 2.87100 -3.19566  
 C -0.42955 4.89068 -2.64928  
 H -1.48372 5.20685 -2.74788  
 H 0.03919 5.01957 -3.64120  
 H 0.05854 5.58095 -1.94633  
 C 0.04526 1.44925 2.61123  
 H 1.10167 1.33180 2.31370  
 C -0.57185 0.03916 2.75617  
 H -1.62695 0.12091 3.07387  
 H -0.03982 -0.55238 3.52284  
 H -0.54378 -0.51531 1.80266  
 C 0.01115 2.18275 3.97047  
 H 0.39169 3.21450 3.89219  
 H 0.62732 1.64510 4.71155  
 H -1.01443 2.23824 4.37783  
 C 1.86081 5.11544 -0.00789  
 H 1.92073 5.35486 -1.08133  
 H 2.49272 5.84377 0.53077  
 H 0.82092 5.25931 0.32542

C 3.03214 3.46189 2.20228  
H 2.18825 3.80607 2.82253  
H 3.84064 4.20873 2.30471  
H 3.39685 2.51286 2.62179  
C 4.11943 3.21650 -0.68336  
H 3.83845 3.11957 -1.74986  
H 4.56222 4.23109 -0.59819  
C 5.16697 2.15663 -0.28397  
H 5.33206 2.16245 0.80989  
H 6.15213 2.41321 -0.72857  
C 4.62484 0.45653 -2.74493  
H 4.53759 -0.54275 -3.20125  
H 5.48206 0.97425 -3.21165  
H 3.71505 1.02287 -3.00619  
C 6.47292 -0.58478 -0.44121  
H 7.04095 -0.05049 0.33930  
H 7.11620 -0.63470 -1.33714  
H 6.30070 -1.61147 -0.08508  
C 3.67530 -1.60002 0.69472  
C 3.74870 -2.89727 0.08176  
C 4.08096 -4.01990 0.86801  
H 4.14779 -5.00150 0.38644  
C 4.33217 -3.91870 2.23890  
H 4.58942 -4.80691 2.82617  
C 4.25244 -2.66180 2.84224  
H 4.45679 -2.56497 3.91492  
C 3.93574 -1.50605 2.10220  
C 3.51804 -3.13005 -1.41458  
H 2.98603 -2.24298 -1.80230  
C 2.65583 -4.38387 -1.68649  
H 3.21374 -5.31374 -1.47626  
H 2.35752 -4.42597 -2.74813  
H 1.74399 -4.39757 -1.06906  
C 4.84841 -3.27919 -2.19230  
H 5.49066 -2.39070 -2.10476  
H 4.65299 -3.45433 -3.26620  
H 5.42232 -4.14348 -1.81155  
C 3.94484 -0.16945 2.83852  
H 3.52216 0.57378 2.14119  
C 3.08380 -0.18482 4.11927  
H 2.05952 -0.53493 3.91426  
H 3.02310 0.82840 4.55475  
H 3.51434 -0.84562 4.89275  
C 5.38567 0.26899 3.19108  
H 5.85136 -0.44828 3.89078  
H 5.38778 1.26204 3.67614  
H 6.02708 0.32228 2.29717  
C -4.54471 -0.62707 0.12051  
C -4.34078 -1.25133 2.52286  
H -3.30363 -1.20574 2.13975  
C -4.44576 -0.30673 3.72948  
H -4.27352 0.73848 3.42588  
H -3.67121 -0.57923 4.46530  
H -5.42029 -0.37287 4.23940  
C -4.65272 -2.71738 2.86571  
H -4.52858 -3.35843 1.97802  
H -5.67688 -2.85105 3.25316  
H -3.95429 -3.06865 3.64357  
C -6.51331 -0.53363 1.30520  
C -7.45375 -0.58749 2.47083  
H -7.36166 -1.52461 3.04443  
H -8.49296 -0.52743 2.11174  
H -7.30079 0.24988 3.17414  
C -6.79542 -0.20349 -0.00464  
C -8.09953 0.17532 -0.63548  
H -8.37773 -0.50142 -1.46314  
H -8.08723 1.20524 -1.03602  
H -8.90681 0.12766 0.11117  
C -5.45953 -0.04201 -2.16776  
H -6.44096 0.35364 -2.47922  
C -4.39130 1.01170 -2.48206  
H -4.57821 1.94990 -1.93596

H -4.38856 1.22412 -3.56430  
H -3.38926 0.64829 -2.19740  
C -5.21219 -1.37220 -2.89897  
H -4.23687 -1.79406 -2.60263  
H -5.20344 -1.20556 -3.98928  
H -5.99822 -2.11000 -2.66599  
C 0.09755 -0.88696 -0.89585  
C -0.87704 -3.10973 -0.77213  
H 0.00296 -3.38723 -1.38566  
C 0.37361 -0.78403 -3.41265  
H -0.71723 -0.59402 -3.46508  
C -2.08934 -3.85385 -1.35282  
H -3.00492 -3.59436 -0.78680  
H -2.25426 -3.57895 -2.40853  
H -1.94936 -4.94785 -1.29051  
C -0.58470 -3.57680 0.67093  
H -1.45580 -3.36653 1.31827  
H -0.37529 -4.66244 0.71014  
H 0.28736 -3.04502 1.08462  
C 0.61992 -2.22509 -3.88976  
H 0.02448 -2.95623 -3.32494  
H 0.34616 -2.31227 -4.95663  
H 1.68632 -2.48919 -3.79353  
C 1.13329 0.19680 -4.31734  
H 0.72390 0.17422 -5.34238  
H 1.06787 1.22908 -3.94207  
H 2.20009 -0.07860 -4.37154

**INT (IV-A) Cu<sub>2</sub>N**

SCF (BP86) Energy = -2415.73408297  
Enthalpy 0K = -2414.451965  
Enthalpy 298K = -2414.451021  
Free Energy 298K = -2414.638846  
Lowest Frequency = 11.0816 cm<sup>-1</sup>  
Second Frequency = 16.9222 cm<sup>-1</sup>  
SCF (BP86-D3BJ) Energy = -2416.11317826  
SCF (C6H6) Energy = -2415.74022221  
SCF (BS2) Energy = -3227.95325549

Cu -3.14590 -0.41417 0.50266  
Si 3.69393 2.25010 -1.46521  
Si 3.56420 -1.74213 -2.21687  
Al 1.61150 0.01464 -0.39122  
N 2.30127 1.77218 -0.43917  
N 2.84659 -1.40562 -0.61167  
N -5.76132 0.70361 -0.08245  
N -5.93957 -1.44004 0.21843  
N -0.17752 -0.28516 -1.12607  
N -1.32726 -0.31500 1.02079  
C 1.72654 2.82367 0.37593  
C 0.67238 3.66657 -0.11704  
C 0.19132 4.72739 0.67707  
H -0.60505 5.36652 0.27747  
C 0.69408 4.98268 1.95505  
H 0.30894 5.81575 2.55319  
C 1.69050 4.14279 2.45736  
H 2.07815 4.31616 3.46763  
C 2.21673 3.07586 1.70169  
C -0.03010 3.43906 -1.45644  
H 0.50544 2.62217 -1.97133  
C -1.48858 2.98655 -1.20455  
H -1.52282 2.08588 -0.57090  
H -2.00720 2.77212 -2.15654  
H -2.05111 3.78705 -0.68914  
C -0.04420 4.68607 -2.37028  
H -0.65691 5.49596 -1.93482  
H -0.48670 4.43672 -3.35171  
H 0.96460 5.08972 -2.54229  
C 3.26943 2.19847 2.37975  
H 3.68855 1.53005 1.60903  
C 2.60740 1.32293 3.46978  
H 2.09692 1.95208 4.22074

H 3.35432 0.70749 4.00145  
H 1.85621 0.64368 3.03418  
C 4.42646 3.01821 2.99369  
H 4.87751 3.70580 2.25923  
H 5.21851 2.34561 3.36508  
H 4.08654 3.62599 3.85111  
C 3.43567 3.98093 -2.22680  
H 2.71286 3.95568 -3.05831  
H 4.39781 4.34420 -2.62936  
H 3.08326 4.71332 -1.48260  
C 5.36845 2.38420 -0.55471  
H 5.35439 3.21577 0.16902  
H 6.16055 2.60350 -1.29367  
H 5.65499 1.46947 -0.01401  
C 3.92048 1.07986 -2.96855  
H 2.94069 0.95181 -3.47000  
H 4.50127 1.72139 -3.66421  
C 4.64673 -0.27827 -2.80155  
H 5.51532 -0.17433 -2.12507  
H 5.06874 -0.59795 -3.77734  
C 2.22081 -1.95832 -3.55688  
H 1.57059 -2.81957 -3.32963  
H 2.69198 -2.13528 -4.54064  
H 1.58104 -1.06659 -3.64630  
C 4.60342 -3.35006 -2.22148  
H 4.77552 -3.74940 -1.21012  
H 5.58628 -3.17632 -2.69295  
H 4.09136 -4.13060 -2.80966  
C 3.10926 -2.35208 0.45037  
C 2.22868 -3.45852 0.68772  
C 2.52669 -4.38255 1.70919  
H 1.84803 -5.22793 1.87328  
C 3.67222 -4.26339 2.50040  
H 3.88713 -4.99556 3.28646  
C 4.54521 -3.19836 2.26096  
H 5.45469 -3.10407 2.86513  
C 4.29193 -2.24261 1.25729  
C 1.00280 -3.73478 -0.18446  
H 0.85470 -2.85349 -0.83076  
C -0.28325 -3.93581 0.64546  
H -0.19059 -4.78038 1.35149  
H -1.13556 -4.16288 -0.02031  
H -0.53100 -3.02800 1.21803  
C 1.24341 -4.96445 -1.09244  
H 2.14725 -4.84200 -1.71125  
H 0.38344 -5.12859 -1.76750  
H 1.37747 -5.88153 -0.49058  
C 5.32646 -1.13827 1.04193  
H 4.83562 -0.37145 0.41777  
C 5.78897 -0.48033 2.35966  
H 4.93652 -0.17253 2.98398  
H 6.40358 0.41235 2.14719  
H 6.41419 -1.16556 2.95970  
C 6.57327 -1.65266 0.28324  
H 7.07873 -2.44583 0.86361  
H 7.29990 -0.83401 0.12987  
H 6.32041 -2.07234 -0.70165  
C -5.01526 -0.42427 0.17946  
C -5.11943 2.04538 -0.14033  
H -4.04145 1.80049 -0.09199  
C -5.37918 2.76812 -1.47077  
H -5.18559 2.10191 -2.32706  
H -4.69260 3.62669 -1.54856  
H -6.40701 3.15747 -1.54963  
C -5.46171 2.89299 1.09535  
H -5.23493 2.34101 2.02169  
H -6.52171 3.19675 1.11857  
H -4.85249 3.81184 1.08654  
C -7.12500 0.40175 -0.20717  
C -8.21315 1.38813 -0.50483  
H -8.19258 2.25669 0.17379  
H -9.19499 0.90497 -0.38397

H -8.16082 1.77157 -1.53871  
C -7.23428 -0.96145 -0.02275  
C -8.44914 -1.83620 -0.05407  
H -8.62509 -2.34355 0.91173  
H -8.38426 -2.61625 -0.83361  
H -9.34262 -1.23195 -0.27249  
C -5.62603 -2.88544 0.38433  
H -6.59212 -3.35546 0.63541  
C -5.12290 -3.47874 -0.94202  
H -5.84611 -3.30831 -1.75714  
H -4.97119 -4.56590 -0.83638  
H -4.16294 -3.02043 -1.22904  
C -4.66295 -3.13646 1.55058  
H -3.66722 -2.70379 1.34933  
H -4.54277 -4.22305 1.69555  
H -5.04540 -2.69844 2.48668  
C -0.24633 -0.23802 0.23025  
C -1.06851 -0.06895 2.46489  
H 0.01415 -0.23084 2.62673  
C -1.31716 -0.44951 -2.04345  
H -2.20436 0.05193 -1.57996  
C -1.84017 -1.06068 3.34994  
H -2.93212 -0.92674 3.22932  
H -1.59047 -2.10368 3.09349  
H -1.59740 -0.89934 4.41501  
C -1.40146 1.38570 2.84017  
H -2.47453 1.58860 2.65876  
H -1.19364 1.57838 3.90795  
H -0.80915 2.09331 2.23786  
C -1.67049 -1.93722 -2.23169  
H -1.89392 -2.41274 -1.26239  
H -2.54864 -2.05106 -2.89326  
H -0.82367 -2.47655 -2.68862  
C -1.04346 0.21641 -3.40002  
H -1.95006 0.19504 -4.03035  
H -0.72771 1.26354 -3.27937  
H -0.24834 -0.32074 -3.94413

**TS\_A\_S<sub>Cu,N</sub>**

SCF (BP86) Energy = -2415.64865920  
Enthalpy 0K = -2414.369505  
Enthalpy 298K = -2414.368561  
Free Energy 298K = -2414.559438  
Lowest Frequency = -725.5661 cm<sup>-1</sup>  
Second Frequency = 9.9042 cm<sup>-1</sup>  
SCF (BP86-D3BJ) Energy = -2416.03066919  
SCF (C6H6) Energy = -2415.65308541  
SCF (BS2) Energy = -3227.86918918

Cu 3.10980 0.51980 0.46921  
Si -3.95255 -1.74838 1.18919  
Si -4.28300 1.40626 -1.06203  
Al -1.59055 -0.08520 -0.24764  
N -2.45127 -1.69012 0.18342  
N -2.64526 1.46542 -0.30100  
N 5.63966 -0.89118 0.34501  
N 5.79543 1.04870 -0.63267  
N 0.08463 -0.19319 -1.03181  
N 1.35782 0.81619 1.05264  
C -1.88919 -2.98972 -0.12578  
C -2.34802 -3.73884 -1.26123  
C -1.84990 -5.03777 -1.48586  
H -2.21588 -5.60179 -2.35178  
C -0.91237 -5.62505 -0.63185  
H -0.54473 -6.63964 -0.81941  
C -0.45264 -4.89215 0.46549  
H 0.28208 -5.34505 1.14141  
C -0.91447 -3.58882 0.73736  
C -3.37175 -3.19585 -2.26067  
H -3.56248 -2.14697 -1.97851  
C -2.84072 -3.22767 -3.71309  
H -1.84377 -2.76881 -3.80007

H -3.52942 -2.68924 -4.38808  
H -2.75962 -4.26397 -4.08686  
C -4.71906 -3.95425 -2.21046  
H -4.57720 -5.02534 -2.44058  
H -5.42105 -3.54286 -2.95781  
H -5.20181 -3.88606 -1.22315  
C -0.34688 -2.88435 1.97216  
H -0.73521 -1.84936 1.97329  
C 1.19611 -2.81283 1.92577  
H 1.64461 -3.82248 1.91752  
H 1.58657 -2.28269 2.81138  
H 1.54095 -2.27278 1.02904  
C -0.79776 -3.56481 3.28577  
H -1.89552 -3.59372 3.37938  
H -0.39676 -3.02377 4.16148  
H -0.43236 -4.60613 3.33908  
C -4.41495 -3.55140 1.60228  
H -4.68678 -4.15285 0.72187  
H -5.28169 -3.53859 2.28742  
H -3.58992 -4.07451 2.11151  
C -3.67319 -0.88374 2.86709  
H -3.26525 -1.60580 3.59481  
H -4.61501 -0.48355 3.28167  
H -2.95568 -0.05276 2.78996  
C -5.45959 -1.01509 0.25881  
H -5.51612 -1.54683 -0.71005  
H -6.34270 -1.36935 0.83117  
C -5.57524 0.50923 0.03173  
H -5.59651 1.03741 1.00345  
H -6.55461 0.73737 -0.43924  
C -4.18219 0.58212 -2.78020  
H -3.67270 1.25569 -3.49005  
H -5.19321 0.37539 -3.17418  
H -3.62927 -0.37066 -2.77122  
C -4.95211 3.16569 -1.35391  
H -5.07775 3.74020 -0.42371  
H -5.93724 3.09205 -1.84810  
H -4.28650 3.74919 -2.00962  
C -2.19484 2.79971 0.04831  
C -1.39257 3.56387 -0.86093  
C -1.03630 4.88837 -0.53551  
H -0.43079 5.46230 -1.24687  
C -1.44626 5.49047 0.65724  
H -1.16457 6.52352 0.88776  
C -2.22466 4.74750 1.54880  
H -2.55384 5.20896 2.48736  
C -2.60897 3.41986 1.27508  
C -0.90890 3.01444 -2.20306  
H -1.22346 1.95858 -2.25436  
C 0.63142 3.05744 -2.30970  
H 1.00688 4.09642 -2.29938  
H 0.96930 2.59631 -3.25525  
H 1.10374 2.51622 -1.47359  
C -1.54232 3.75772 -3.40191  
H -2.64275 3.68963 -3.39306  
H -1.18491 3.33053 -4.35631  
H -1.27550 4.82970 -3.39641  
C -3.47614 2.71228 2.31898  
H -3.67127 1.69796 1.93709  
C -2.75564 2.58158 3.68069  
H -1.79793 2.04506 3.58636  
H -3.38552 2.02925 4.40017  
H -2.54198 3.57332 4.11778  
C -4.83796 3.41375 2.53363  
H -4.70422 4.44088 2.91714  
H -5.44330 2.86059 3.27404  
H -5.42388 3.48105 1.60280  
C 4.89714 0.23092 0.02251  
C 5.03443 -1.98966 1.13581  
H 3.96754 -1.69953 1.17532  
C 5.12543 -3.35231 0.43091  
H 4.77966 -3.27904 -0.61282

H 4.47583 -4.07310 0.95461  
H 6.14732 -3.76519 0.43712  
C 5.56348 -2.00999 2.57991  
H 5.45300 -1.01640 3.04357  
H 6.62420 -2.30774 2.63451  
H 4.98378 -2.73526 3.17516  
C 6.96999 -0.77031 -0.08863  
C 8.03542 -1.81053 0.07905  
H 8.13544 -2.15025 1.12370  
H 9.01009 -1.39520 -0.22118  
H 7.85453 -2.70431 -0.54420  
C 7.06421 0.45605 -0.71095  
C 8.24037 1.10337 -1.37366  
H 8.50768 2.06874 -0.90650  
H 8.06681 1.29159 -2.44901  
H 9.12260 0.44943 -1.29748  
C 5.45812 2.37897 -1.19689  
H 6.40855 2.77135 -1.59669  
C 4.46495 2.23999 -2.36155  
H 4.86449 1.57572 -3.14601  
H 4.26404 3.22809 -2.80800  
H 3.51028 1.81748 -2.00489  
C 4.96499 3.33870 -0.10240  
H 4.03065 2.96251 0.35132  
H 4.77085 4.33370 -0.53676  
H 5.71546 3.44476 0.69845  
C 0.84153 0.25385 -0.01175  
C 0.78074 -0.70591 -2.27265  
H 1.70799 -0.10237 -2.33988  
C 1.17036 -2.17997 -2.11944  
H 1.80926 -2.30798 -1.22890  
H 1.74019 -2.52630 -3.00017  
H 0.28081 -2.82218 -2.00403  
C -0.09623 -0.45553 -3.50239  
H -1.09284 -0.91086 -3.37333  
H 0.35974 -0.90424 -4.40118  
H -0.23830 0.62073 -3.68920  
C 0.63106 1.41091 2.20896  
H -0.45237 1.27546 1.97478  
C 0.98232 0.66796 3.50525  
H 0.64149 -0.37947 3.46986  
H 0.51596 1.15528 4.37889  
H 2.07729 0.67286 3.65148  
C 0.96214 2.90625 2.30558  
H 2.04764 3.03878 2.46109  
H 0.43292 3.37087 3.15431  
H 0.66726 3.43550 1.38556

**ACu,N**

SCF (BP86) Energy = -2415.74569463  
Enthalpy 0K = -2414.464005  
Enthalpy 298K = -2414.463061  
Free Energy 298K = -2414.654138  
Lowest Frequency = 7.9095 cm<sup>-1</sup>  
Second Frequency = 12.8536 cm<sup>-1</sup>  
SCF (BP86-D3BJ) Energy = -2416.12376326  
SCF (C6H6) Energy = -2415.75165274  
SCF (BS2) Energy = -3227.96520377

Cu -3.07534 -0.47795 0.46937  
Si 4.28287 1.93391 0.67753  
Si 4.35456 -1.46284 -1.25979  
Al 1.70735 0.05170 -0.09408  
N 2.61226 1.70109 0.04679  
N 2.80288 -1.45473 -0.35478  
N -5.64204 0.87557 0.26990  
N -5.79795 -1.12876 -0.55134  
N -0.06474 0.19100 -0.83489  
N -1.29934 -0.59150 1.10418  
C 1.86960 2.92521 -0.15765  
C 1.86570 3.57433 -1.43872  
C 1.20989 4.81268 -1.58910



H 1.22832 5.30795 -2.56641  
 C 0.53905 5.42550 -0.52537  
 H 0.04193 6.39207 -0.66326  
 C 0.51267 4.78055 0.71414  
 H -0.01504 5.24999 1.55331  
 C 1.16048 3.54642 0.92257  
 C 2.55489 2.97133 -2.66567  
 H 2.69805 1.89804 -2.44662  
 C 1.71323 3.10373 -3.95582  
 H 0.66297 2.81039 -3.80143  
 H 2.13671 2.46922 -4.75427  
 H 1.71446 4.14096 -4.33664  
 C 3.94734 3.59009 -2.93195  
 H 3.86109 4.68003 -3.09257  
 H 4.40046 3.15067 -3.83902  
 H 4.64296 3.42737 -2.09593  
 C 1.08275 2.93324 2.32318  
 H 1.61859 1.96893 2.28929  
 C -0.37704 2.64685 2.74045  
 H -0.96999 3.57852 2.78929  
 H -0.40462 2.18476 3.74393  
 H -0.86555 1.95783 2.03302  
 C 1.76078 3.82574 3.38891  
 H 2.81634 4.03097 3.14691  
 H 1.72701 3.33951 4.38047  
 H 1.24716 4.79986 3.47941  
 C 4.72286 3.79098 0.74990  
 H 4.79575 4.26863 -0.23892  
 H 5.70175 3.89688 1.25098  
 H 3.98166 4.36161 1.33167  
 C 4.49744 1.30327 2.46840  
 H 3.99009 1.97403 3.18142  
 H 5.57033 1.28312 2.73247  
 H 4.09669 0.29035 2.62085  
 C 5.61473 1.09927 -0.41772  
 H 5.48102 1.46308 -1.45379  
 H 6.57055 1.54822 -0.07394  
 C 5.73205 -0.44117 -0.40689  
 H 5.84018 -0.81513 0.62926  
 H 6.66744 -0.74575 -0.92217  
 C 4.11899 -0.79459 -3.03204  
 H 3.42773 -1.43397 -3.60614  
 H 5.08519 -0.77181 -3.56729  
 H 3.71279 0.23032 -3.03835  
 C 5.03526 -3.23912 -1.38879  
 H 5.31646 -3.64276 -0.40251  
 H 5.93843 -3.23529 -2.02437  
 H 4.30839 -3.93869 -1.83058  
 C 2.36563 -2.74852 0.12272  
 C 1.52796 -3.59140 -0.67827  
 C 1.19714 -4.88338 -0.22061  
 H 0.57200 -5.52515 -0.85292  
 C 1.64489 -5.36829 1.01177  
 H 1.37803 -6.37699 1.34545  
 C 2.43482 -4.53726 1.81184  
 H 2.78345 -4.89970 2.78639  
 C 2.80579 -3.24483 1.39417  
 C 0.96095 -3.15231 -2.02963  
 H 1.23455 -2.09202 -2.16850  
 C -0.58133 -3.25443 -2.04054  
 H -0.91736 -4.29786 -1.90347  
 H -0.98988 -2.90654 -3.00648  
 H -1.02136 -2.64655 -1.23236  
 C 1.55304 -3.96132 -3.20653  
 H 2.64906 -3.85820 -3.26402  
 H 1.13011 -3.61779 -4.16804  
 H 1.32482 -5.03789 -3.10706  
 C 3.66934 -2.40900 2.33609  
 H 3.90480 -1.47835 1.79454  
 C 2.89636 -2.03414 3.62101  
 H 1.96792 -1.48837 3.38283  
 H 3.51168 -1.39488 4.27943

H 2.61652 -2.93572 4.19490  
 C 5.00469 -3.09615 2.69771  
 H 4.84160 -4.03331 3.25935  
 H 5.61987 -2.43362 3.33247  
 H 5.59242 -3.34587 1.79849  
 C -4.90451 -0.26090 0.02499  
 C -5.03169 2.04336 0.96266  
 H -3.96598 1.75202 1.02793  
 C -5.12004 3.33525 0.13662  
 H -4.76496 3.17006 -0.89305  
 H -4.47356 4.09970 0.59802  
 H -6.14185 3.74629 0.10016  
 C -5.56263 2.19346 2.39758  
 H -5.45490 1.24859 2.95396  
 H -6.62173 2.49951 2.42636  
 H -4.97970 2.96870 2.92191  
 C -6.97306 0.72325 -0.14649  
 C -8.04067 1.77065 -0.05344  
 H -8.13243 2.19191 0.96121  
 H -9.01608 1.33004 -0.31138  
 H -7.86606 2.61044 -0.74850  
 C -7.06805 -0.55025 -0.67085  
 C -8.24672 -1.25159 -1.27167  
 H -8.51285 -2.17149 -0.72056  
 H -8.07475 -1.53168 -2.32647  
 H -9.12786 -0.59250 -1.25039  
 C -5.45784 -2.49860 -1.02245  
 H -6.42022 -2.93766 -1.33465  
 C -4.52946 -2.44096 -2.24559  
 H -4.96744 -1.82788 -3.05069  
 H -4.35930 -3.45818 -2.63537  
 H -3.55244 -2.01018 -1.97059  
 C -4.88702 -3.35269 0.11900  
 H -3.92028 -2.94526 0.46385  
 H -4.72025 -4.38333 -0.23564  
 H -5.57735 -3.38419 0.97797  
 C -0.17772 -0.27140 0.43997  
 C -1.16684 0.48931 -1.76019  
 H -2.01742 -0.19802 -1.51763  
 C -1.66077 1.93609 -1.56379  
 H -1.98939 2.09845 -0.52318  
 H -2.50860 2.15698 -2.23815  
 H -0.84859 2.65336 -1.76853  
 C -0.73562 0.22754 -3.20895  
 H 0.14742 0.83699 -3.46001  
 H -1.54403 0.48838 -3.91459  
 H -0.46854 -0.82914 -3.36127  
 C -1.08801 -1.19722 2.44564  
 H -0.09502 -0.85655 2.79939  
 C -2.15220 -0.71430 3.44502  
 H -2.16195 0.38561 3.51737  
 H -1.95872 -1.12902 4.45021  
 H -3.16060 -1.04768 3.13207  
 C -1.06677 -2.73276 2.36068  
 H -2.04285 -3.10963 2.00114  
 H -0.87366 -3.18240 3.35119  
 H -0.28571 -3.07726 1.66500

**SCu,N**

SCF (BP86) Energy = -2415.76651891  
 Enthalpy 0K = -2414.484465  
 Enthalpy 298K = -2414.483521  
 Free Energy 298K = -2414.672601  
 Lowest Frequency = 11.2447 cm<sup>-1</sup>  
 Second Frequency = 15.8784 cm<sup>-1</sup>  
 SCF (BP86-D3BJ) Energy = -2416.15303370  
 SCF (C6H6) Energy = -2415.77222331  
 SCF (BS2) Energy = -3227.98497605

Cu 2.90200 -0.20795 0.07333  
 Si -3.94367 1.63084 -1.20911  
 Si -4.13879 -1.57213 0.95104

Al -1.44585 0.00376 0.01834  
 N -2.44638 1.59770 -0.20898  
 N -2.52583 -1.55089 0.15642  
 N 5.58276 0.81470 -0.56111  
 N 5.75233 -0.94923 0.68996  
 N 0.19766 0.28765 1.07518  
 N 0.15257 -0.44009 -1.01440  
 C -1.99314 2.90890 0.20227  
 C -2.55200 3.55825 1.35672  
 C -2.15039 4.86691 1.69138  
 H -2.59165 5.34487 2.57420  
 C -1.21730 5.57085 0.92608  
 H -0.92594 6.59150 1.19694  
 C -0.66698 4.94427 -0.19494  
 H 0.05953 5.49050 -0.80832  
 C -1.02623 3.63463 -0.57130  
 C -3.58496 2.89351 2.26867  
 H -3.74254 1.87590 1.87703  
 C -3.08051 2.78413 3.72605  
 H -2.09238 2.30139 3.78312  
 H -3.78684 2.19696 4.33939  
 H -2.98633 3.78118 4.19258  
 C -4.94750 3.62529 2.26670  
 H -4.84281 4.66298 2.63104  
 H -5.66243 3.11022 2.93337  
 H -5.39687 3.66944 1.26201  
 C -0.36595 3.06454 -1.82947  
 H -0.65719 2.00280 -1.90875  
 C 1.17525 3.12360 -1.73814  
 H 1.53594 4.16169 -1.62504  
 H 1.63158 2.71161 -2.65520  
 H 1.53837 2.53508 -0.87913  
 C -0.84006 3.79103 -3.11002  
 H -1.93203 3.71951 -3.24056  
 H -0.36315 3.35452 -4.00647  
 H -0.57865 4.86426 -3.08022  
 C -4.49333 3.42334 -1.56975  
 H -4.80774 3.97569 -0.67114  
 H -5.34923 3.39344 -2.26792  
 H -3.69001 4.00868 -2.04474  
 C -3.61078 0.85031 -2.92118  
 H -3.14153 1.60028 -3.58121  
 H -4.54445 0.51256 -3.40478  
 H -2.92878 -0.01127 -2.86595  
 C -5.44356 0.81263 -0.33701  
 H -5.56000 1.34180 0.62768  
 H -6.32481 1.12134 -0.93839  
 C -5.48964 -0.71359 -0.10510  
 H -5.50269 -1.24156 -1.07740  
 H -6.45200 -0.98427 0.37852  
 C -4.03896 -0.80703 2.69764  
 H -3.57889 -1.53015 3.39284  
 H -5.04303 -0.55797 3.08478  
 H -3.43159 0.11017 2.72442  
 C -4.75772 -3.35890 1.21101  
 H -4.90414 -3.91113 0.27035  
 H -5.72692 -3.32358 1.74012  
 H -4.05945 -3.94839 1.82604  
 C -2.03112 -2.85432 -0.23439  
 C -1.18388 -3.61340 0.64224  
 C -0.76047 -4.90447 0.26738  
 H -0.12592 -5.47383 0.95711  
 C -1.13430 -5.48061 -0.94997  
 H -0.79514 -6.48621 -1.22156  
 C -1.95785 -4.74814 -1.80873  
 H -2.26702 -5.19189 -2.76274  
 C -2.42021 -3.45810 -1.48004  
 C -0.72496 -3.09466 2.00693  
 H -1.05667 -2.04563 2.08520  
 C 0.81353 -3.11734 2.14070  
 H 1.21240 -4.14522 2.06953  
 H 1.12349 -2.71438 3.12201

H 1.28635 -2.50622 1.35444  
 C -1.35883 -3.88676 3.17436  
 H -2.45951 -3.83701 3.15516  
 H -1.01985 -3.48478 4.14643  
 H -1.07309 -4.95344 3.13553  
 C -3.35812 -2.77996 -2.48332  
 H -3.58564 -1.78001 -2.08147  
 C -2.71437 -2.60662 -3.87825  
 H -1.77660 -2.02904 -3.83472  
 H -3.40420 -2.07592 -4.55783  
 H -2.47993 -3.58322 -4.33798  
 C -4.69316 -3.54485 -2.64975  
 H -4.52290 -4.56289 -3.04337  
 H -5.35262 -3.01865 -3.36329  
 H -5.23872 -3.64377 -1.69814  
 C 4.82807 -0.14048 0.07851  
 C 4.92695 1.92629 -1.30211  
 H 3.85816 1.64196 -1.26824  
 C 5.07349 3.26715 -0.56517  
 H 4.74359 3.17424 0.48193  
 H 4.43912 4.02247 -1.05734  
 H 6.10993 3.64396 -0.57580  
 C 5.35301 1.98595 -2.77680  
 H 5.27434 0.99460 -3.25176  
 H 6.38153 2.35998 -2.90602  
 H 4.68193 2.67553 -3.31472  
 C 6.95531 0.61192 -0.35268  
 C 8.05720 1.45113 -0.92448  
 H 8.15692 1.32564 -2.01686  
 H 9.01818 1.15974 -0.47300  
 H 7.91639 2.52603 -0.72420  
 C 7.05968 -0.51205 0.44246  
 C 8.28023 -1.19858 0.97264  
 H 8.37185 -2.23554 0.60231  
 H 8.29404 -1.23522 2.07670  
 H 9.18454 -0.65882 0.65290  
 C 5.40838 -2.13633 1.51806  
 H 6.37852 -2.54262 1.84991  
 C 4.60413 -1.72171 2.75957  
 H 5.14318 -0.96196 3.34936  
 H 4.42491 -2.60095 3.40020  
 H 3.62552 -1.30471 2.46480  
 C 4.69643 -3.20596 0.67660  
 H 3.71379 -2.84119 0.33321  
 H 4.53223 -4.11110 1.28434  
 H 5.29415 -3.48196 -0.20770  
 C 0.97123 -0.13712 0.03362  
 C 0.81226 0.77326 2.31304  
 H 1.83779 0.33813 2.35059  
 C 0.97016 2.30654 2.33183  
 H 1.57305 2.64296 1.47201  
 H 1.47499 2.63426 3.25920  
 H -0.00793 2.81156 2.26963  
 C 0.04159 0.27824 3.54776  
 H -1.01359 0.59616 3.50217  
 H 0.47858 0.69212 4.47322  
 H 0.05658 -0.82018 3.61903  
 C 0.60584 -1.11104 -2.23891  
 H -0.32069 -1.40296 -2.76356  
 C 1.39222 -0.17806 -3.18133  
 H 0.80097 0.71410 -3.44234  
 H 1.66276 -0.70268 -4.11534  
 H 2.32686 0.15749 -2.69409  
 C 1.39687 -2.40614 -1.97066  
 H 2.36519 -2.17096 -1.48719  
 H 1.61286 -2.93145 -2.91796  
 H 0.83147 -3.08465 -1.31300

**I<sub>P,H</sub>**

SCF (BP86) Energy = -1970.41065264

Enthalpy 0K = -1969.267413

Enthalpy 298K = -1969.266469

Free Energy 298K = -1969.436687  
 Lowest Frequency = 11.9835 cm<sup>-1</sup>  
 Second Frequency = 19.1143 cm<sup>-1</sup>  
 SCF (BP86-D3BJ) Energy = -1970.75455904  
 SCF (C6H6) Energy = -1970.41366312  
 SCF (BS2) Energy = -3117.34318072

Cu 1.31793 0.06953 0.02060  
 P 3.66004 0.18200 -0.02279  
 Si -3.84557 1.63328 0.90485  
 Si -3.66603 -2.11026 -0.39938  
 Al -1.07164 -0.02959 0.05892  
 N -2.20803 1.47316 0.18191  
 N -1.96227 -1.69275 -0.00423  
 C -1.57963 2.68283 -0.29713  
 C -1.59995 2.98975 -1.69573  
 C -0.94570 4.14633 -2.16308  
 H -0.95994 4.36953 -3.23643  
 C -0.29123 5.02076 -1.28825  
 H 0.20486 5.92023 -1.66911  
 C -0.28923 4.73452 0.08184  
 H 0.21437 5.42022 0.77413  
 C -0.91934 3.58497 0.59764  
 C -2.31484 2.08834 -2.70307  
 H -2.89524 1.35645 -2.11384  
 C -3.30610 2.86414 -3.59761  
 H -4.03655 3.42930 -2.99430  
 H -3.86467 2.16775 -4.24776  
 H -2.78963 3.58487 -4.25631  
 C -1.30266 1.29981 -3.56485  
 H -0.67174 1.98468 -4.15991  
 H -1.82124 0.62061 -4.26516  
 H -0.62794 0.69425 -2.93254  
 C -0.86099 3.33458 2.10488  
 H -1.43983 2.41776 2.30033  
 C -1.48805 4.48597 2.92201  
 H -1.46958 4.25011 4.00120  
 H -2.53613 4.67020 2.63252  
 H -0.93406 5.43128 2.78159  
 C 0.58277 3.06308 2.57527  
 H 1.23508 3.93845 2.40198  
 H 1.00657 2.20276 2.02810  
 H 0.60959 2.83215 3.65564  
 C -4.53933 3.36723 0.52877  
 H -3.85397 4.17249 0.83690  
 H -5.49734 3.50932 1.05897  
 H -4.72905 3.49095 -0.55094  
 C -3.83481 1.35290 2.79836  
 H -3.25482 0.45448 3.07182  
 H -4.86741 1.20564 3.16290  
 H -3.40679 2.20833 3.34573  
 C -5.11154 0.38572 0.20683  
 H -6.08484 0.76291 0.58536  
 H -5.16678 0.49589 -0.89266  
 C -4.93344 -1.09651 0.60575  
 H -5.88761 -1.64362 0.45486  
 H -4.71146 -1.19412 1.68524  
 C -4.10298 -1.81376 -2.23938  
 H -3.74151 -0.83395 -2.59532  
 H -5.20051 -1.83025 -2.36720  
 H -3.67992 -2.58898 -2.89853  
 C -3.98016 -3.94560 0.00554  
 H -3.25346 -4.61207 -0.48608  
 H -4.99165 -4.23276 -0.33159  
 H -3.91989 -4.13299 1.09088  
 C -1.06001 -2.79907 0.21619  
 C -0.74828 -3.21279 1.55128  
 C 0.16508 -4.26563 1.75584  
 H 0.40163 -4.57422 2.78111  
 C 0.76354 -4.93482 0.68200  
 H 1.46303 -5.75881 0.86078  
 C 0.44592 -4.54353 -0.62407

H 0.90606 -5.06861 -1.46988  
 C -0.45221 -3.48913 -0.88183  
 C -1.37967 -2.53675 2.76955  
 H -2.16727 -1.86492 2.38473  
 C -0.34897 -1.66691 3.52493  
 H 0.47873 -2.28562 3.91668  
 H -0.81810 -1.14732 4.37985  
 H 0.09169 -0.90601 2.85461  
 C -2.04699 -3.54495 3.73052  
 H -2.78898 -4.17188 3.20786  
 H -2.56374 -3.01319 4.54893  
 H -1.30747 -4.22180 4.19430  
 C -0.74589 -3.11557 -2.33610  
 H -1.50794 -2.32043 -2.31494  
 C 0.49520 -2.52925 -3.04212  
 H 0.85499 -1.63231 -2.50673  
 H 0.25392 -2.23713 -4.07993  
 H 1.32325 -3.25956 -3.08002  
 C -1.31481 -4.30464 -3.14206  
 H -0.58085 -5.12573 -3.22817  
 H -1.57716 -3.98833 -4.16753  
 H -2.22152 -4.71988 -2.67068  
 C 4.15942 1.93170 -0.75867  
 C 3.17365 2.22503 -1.91921  
 H 3.29089 1.54499 -2.77413  
 H 3.35533 3.25286 -2.28587  
 H 2.12381 2.17312 -1.58003  
 C 5.61431 2.05073 -1.25957  
 H 6.35235 1.85208 -0.46656  
 H 5.78518 3.08382 -1.61802  
 H 5.82862 1.37868 -2.10500  
 C 3.90763 3.02482 0.30532  
 H 2.88065 2.98464 0.70313  
 H 4.03173 4.01175 -0.17843  
 H 4.61901 2.98446 1.14470  
 C 4.41413 -1.22448 -1.16531  
 C 4.09324 -0.89750 -2.64280  
 H 3.01953 -0.70307 -2.80011  
 H 4.36130 -1.77641 -3.25842  
 H 4.66840 -0.04300 -3.03123  
 C 5.93494 -1.44977 -1.02402  
 H 6.52392 -0.54864 -1.25542  
 H 6.24531 -2.23854 -1.73578  
 H 6.21771 -1.79737 -0.01814  
 C 3.66194 -2.53710 -0.83037  
 H 3.91241 -2.94174 0.15893  
 H 3.94200 -3.30341 -1.57782  
 H 2.56760 -2.41150 -0.87481  
 C 4.42928 -0.00489 1.77465  
 C 3.51330 0.77563 2.74865  
 H 3.49873 1.85841 2.56599  
 H 3.87890 0.61783 3.78117  
 H 2.47457 0.40681 2.70017  
 C 5.88513 0.48793 1.92209  
 H 6.58091 -0.03320 1.24642  
 H 6.22436 0.29458 2.95781  
 H 5.98511 1.57103 1.74928  
 C 4.35225 -1.48655 2.21249  
 H 3.33942 -1.90426 2.08568  
 H 4.60058 -1.54143 3.28909  
 H 5.07049 -2.13115 1.68328

**TS (I-II)<sub>P,H</sub>**  
 SCF (BP86) Energy = -2158.98551772  
 Enthalpy 0K = -2157.827492  
 Enthalpy 298K = -2157.826547  
 Free Energy 298K = -2158.000976  
 Lowest Frequency = -174.1223 cm<sup>-1</sup>  
 Second Frequency = 18.2355 cm<sup>-1</sup>  
 SCF (BP86-D3BJ) Energy = -2159.35179657  
 SCF (C6H6) Energy = -2158.98845697  
 SCF (BS2) Energy = -3305.97857852

Cu -1.35011 -0.44878 -0.09939  
 P -3.73756 -0.65673 -0.00738  
 Si 3.64671 -0.86423 1.72664  
 Si 3.20122 2.61174 -0.00328  
 Al 1.01726 0.10308 0.03644  
 N 2.41831 -1.11129 0.43473  
 N 1.53699 1.91492 0.06254  
 C 2.30952 -2.43439 -0.13670  
 C 3.00063 -2.76393 -1.35133  
 C 2.85395 -4.05152 -1.90385  
 H 3.38558 -4.29395 -2.83090  
 C 2.06119 -5.02989 -1.29423  
 H 1.96061 -6.02391 -1.74327  
 C 1.41507 -4.72365 -0.09287  
 H 0.81314 -5.49304 0.40572  
 C 1.52919 -3.45210 0.50406  
 C 3.96240 -1.78651 -2.02981  
 H 3.75363 -0.79206 -1.60001  
 C 5.43087 -2.14749 -1.69962  
 H 5.61305 -2.16857 -0.61398  
 H 6.12430 -1.41524 -2.15107  
 H 5.68623 -3.14557 -2.09897  
 C 3.79372 -1.70243 -3.56222  
 H 4.08225 -2.64606 -4.05880  
 H 4.44744 -0.91148 -3.97050  
 H 2.75754 -1.46816 -3.84983  
 C 0.83355 -3.22468 1.84683  
 H 1.03474 -2.18260 2.14617  
 C 1.38155 -4.15748 2.95157  
 H 0.89175 -3.94251 3.91839  
 H 2.46865 -4.03625 3.08557  
 H 1.19201 -5.21901 2.71205  
 C -0.69439 -3.37772 1.72877  
 H -0.97875 -4.38940 1.38763  
 H -1.09199 -2.64349 0.99948  
 H -1.18424 -3.19554 2.70245  
 C 4.67131 -2.45295 2.01833  
 H 4.16975 -3.35849 1.64309  
 H 4.84750 -2.58156 3.10065  
 H 5.65849 -2.39146 1.53066  
 C 2.82364 -0.39785 3.38839  
 H 2.09667 0.42395 3.28191  
 H 3.59303 -0.06938 4.11059  
 H 2.29605 -1.25907 3.83155  
 C 4.88474 0.52642 1.30234  
 H 5.72173 0.38974 2.01908  
 H 5.31653 0.31719 0.30530  
 C 4.36070 1.97565 1.37934  
 H 5.21438 2.68527 1.34575  
 H 3.87274 2.16234 2.35533  
 C 4.06501 2.28386 -1.67344  
 H 4.03634 1.21768 -1.95070  
 H 5.12580 2.58663 -1.61180  
 H 3.59971 2.85559 -2.49261  
 C 3.11074 4.49701 0.27346  
 H 2.38224 4.99641 -0.38377  
 H 4.10471 4.93922 0.08337  
 H 2.83267 4.73304 1.31442  
 C 0.46298 2.88308 0.07834  
 C -0.08305 3.32795 1.32663  
 C -1.14656 4.25126 1.33268  
 H -1.56176 4.58045 2.29245  
 C -1.66273 4.78013 0.14363  
 H -2.47912 5.51030 0.16777  
 C -1.10328 4.37981 -1.07454  
 H -1.48765 4.80786 -2.00820  
 C -0.05358 3.44098 -1.13682  
 C 0.47940 2.84065 2.66268  
 H 1.43323 2.33508 2.43223  
 C -0.45046 1.79929 3.32230  
 H -1.43476 2.24284 3.55679

H -0.01755 1.41638 4.26402  
 H -0.62161 0.94098 2.64673  
 C 0.78025 3.99232 3.64627  
 H 1.42943 4.75796 3.18929  
 H 1.28934 3.60394 4.54592  
 H -0.14163 4.49731 3.98573  
 C 0.51806 3.08723 -2.51286  
 H 1.28531 2.31198 -2.35541  
 C -0.54687 2.50361 -3.46702  
 H -1.04058 1.61860 -3.03332  
 H -0.08463 2.20414 -4.42424  
 H -1.33633 3.24170 -3.69623  
 C 1.19236 4.30808 -3.18253  
 H 0.46085 5.11383 -3.37275  
 H 1.63352 4.02302 -4.15452  
 H 1.99481 4.73066 -2.55628  
 C -4.43387 -2.45930 -0.39611  
 C -3.53389 -3.06120 -1.50316  
 H -3.58534 -2.51510 -2.45437  
 H -3.86060 -4.10048 -1.69743  
 H -2.47698 -3.09286 -1.19287  
 C -5.91179 -2.49935 -0.84287  
 H -6.59321 -2.07184 -0.09055  
 H -6.20698 -3.55557 -0.99207  
 H -6.08367 -1.98167 -1.79872  
 C -4.28054 -3.37802 0.83828  
 H -3.25049 -3.39154 1.22470  
 H -4.52640 -4.41077 0.52711  
 H -4.96515 -3.11917 1.66024  
 C -4.46158 0.58448 -1.34470  
 C -4.22272 -0.01226 -2.75254  
 H -3.17280 -0.31238 -2.90312  
 H -4.45668 0.76636 -3.50241  
 H -4.86827 -0.87616 -2.97309  
 C -5.95429 0.94737 -1.19281  
 H -6.61919 0.07171 -1.23989  
 H -6.23922 1.62278 -2.02207  
 H -6.16042 1.48859 -0.25591  
 C -3.61396 1.87684 -1.26463  
 H -3.80398 2.47395 -0.36355  
 H -3.85357 2.51332 -2.13680  
 H -2.53165 1.66456 -1.29495  
 C -4.38357 -0.11506 1.76310  
 C -3.48065 -0.81749 2.80789  
 H -3.60218 -1.90909 2.82417  
 H -3.74189 -0.43928 3.81425  
 H -2.41475 -0.59379 2.63178  
 C -5.86578 -0.43514 2.05567  
 H -6.55128 0.04885 1.34297  
 H -6.11855 -0.05607 3.06433  
 H -6.07832 -1.51523 2.05637  
 C -4.16415 1.40556 1.93962  
 H -3.13854 1.71842 1.68315  
 H -4.33205 1.65782 3.00368  
 H -4.87309 2.00789 1.35089  
 O 1.11579 -0.29769 -2.46695  
 C 0.05704 -0.86617 -2.47002  
 O -0.88911 -1.49554 -2.82187

**III<sub>F,H</sub>**

SCF (BP86) Energy = -2159.01708011  
 Enthalpy 0K = -2157.857753  
 Enthalpy 298K = -2157.856808  
 Free Energy 298K = -2158.029246  
 Lowest Frequency = 17.2869 cm<sup>-1</sup>  
 Second Frequency = 23.9284 cm<sup>-1</sup>  
 SCF (BP86-D3BJ) Energy = -2159.38062580  
 SCF (C6H6) Energy = -2159.02168851  
 SCF (BS2) Energy = -3306.00945026

Cu -1.45900 -0.50599 -0.37288  
 P -3.77134 -0.70158 0.00323

Si 3.64000 -0.86606 1.76119  
Si 3.17326 2.72360 0.18018  
Al 1.29925 0.14517 -0.30414  
N 2.45668 -1.11259 0.42024  
N 1.54581 1.94342 0.09091  
C 2.46906 -2.42403 -0.20191  
C 3.21331 -2.66122 -1.40128  
C 3.19807 -3.94850 -1.97388  
H 3.76860 -4.12466 -2.89294  
C 2.47949 -5.00251 -1.40149  
H 2.48084 -5.99369 -1.86756  
C 1.76483 -4.77370 -0.22117  
H 1.20628 -5.59755 0.23887  
C 1.75139 -3.50800 0.39575  
C 4.05916 -1.58272 -2.08164  
H 3.86121 -0.63532 -1.54991  
C 5.57119 -1.88307 -1.95158  
H 5.88868 -1.95946 -0.89822  
H 6.16744 -1.08509 -2.42918  
H 5.82995 -2.83583 -2.44699  
C 3.68361 -1.38311 -3.56684  
H 3.90518 -2.28546 -4.16426  
H 4.27079 -0.55317 -3.99942  
H 2.61447 -1.14648 -3.67444  
C 0.95266 -3.33681 1.68854  
H 1.15966 -2.32305 2.06825  
C 1.34753 -4.35294 2.78355  
H 0.78699 -4.15349 3.71441  
H 2.42337 -4.30465 3.01973  
H 1.12117 -5.39007 2.47932  
C -0.56271 -3.41715 1.41763  
H -0.84184 -4.39037 0.97560  
H -0.87323 -2.62262 0.70833  
H -1.13560 -3.28471 2.35354  
C 4.71768 -2.42143 1.96200  
H 4.11833 -3.33145 2.11844  
H 5.37620 -2.28885 2.83853  
H 5.35612 -2.59815 1.08164  
C 2.78879 -0.51831 3.43335  
H 2.04789 0.29331 3.35890  
H 3.54434 -0.21506 4.18027  
H 2.27433 -1.41267 3.82201  
C 4.83779 0.58283 1.41377  
H 5.67246 0.42657 2.12874  
H 5.28383 0.43617 0.41178  
C 4.28685 2.01808 1.56567  
H 5.13092 2.73866 1.60814  
H 3.76319 2.13467 2.53381  
C 4.12542 2.54074 -1.46287  
H 4.17954 1.49083 -1.79658  
H 5.16152 2.90523 -1.34370  
H 3.65316 3.12146 -2.27145  
C 2.96366 4.57278 0.58279  
H 2.25332 5.07979 -0.08828  
H 3.94289 5.07449 0.48946  
H 2.60773 4.71954 1.61606  
C 0.41183 2.84088 0.12176  
C -0.18162 3.18247 1.38055  
C -1.28184 4.06033 1.41515  
H -1.73035 4.31755 2.38165  
C -1.79215 4.63621 0.24505  
H -2.63725 5.33188 0.29108  
C -1.19188 4.32956 -0.98034  
H -1.57357 4.79529 -1.89644  
C -0.09927 3.44238 -1.07387  
C 0.36939 2.62618 2.69406  
H 1.36954 2.22016 2.46493  
C -0.49347 1.45474 3.20908  
H -1.51827 1.79441 3.44091  
H -0.06715 1.01428 4.12824  
H -0.56495 0.65632 2.44746  
C 0.53082 3.69825 3.79273

H 1.12064 4.55989 3.43742  
H 1.04485 3.27014 4.67117  
H -0.44346 4.08349 4.14268  
C 0.52388 3.21089 -2.45412  
H 1.30199 2.43845 -2.34005  
C -0.49581 2.69312 -3.49258  
H -0.96474 1.74946 -3.17465  
H 0.00768 2.50368 -4.45651  
H -1.29774 3.43057 -3.67725  
C 1.19501 4.49917 -2.98823  
H 0.45172 5.30309 -3.13636  
H 1.67690 4.30740 -3.96351  
H 1.96432 4.88341 -2.29835  
C -4.39334 -2.51779 -0.42983  
C -3.49722 -3.05137 -1.57470  
H -3.55576 -2.45806 -2.49579  
H -3.81691 -4.08303 -1.81523  
H -2.43699 -3.08968 -1.27650  
C -5.87941 -2.59387 -0.84559  
H -6.55901 -2.22120 -0.06298  
H -6.13795 -3.65427 -1.02724  
H -6.09131 -2.04855 -1.77731  
C -4.18228 -3.46546 0.77343  
H -3.14671 -3.44641 1.14471  
H -4.38827 -4.49748 0.43300  
H -4.86579 -3.26177 1.61201  
C -4.54472 0.54886 -1.29954  
C -4.34065 -0.01310 -2.72734  
H -3.29049 -0.28945 -2.91880  
H -4.61365 0.78234 -3.44572  
H -4.98421 -0.87837 -2.94827  
C -6.03848 0.87597 -1.08631  
H -6.68336 -0.01543 -1.11784  
H -6.36798 1.54898 -1.90030  
H -6.22535 1.40601 -0.13892  
C -3.71660 1.85363 -1.22167  
H -3.82382 2.39536 -0.27311  
H -4.05343 2.53104 -2.02845  
H -2.64041 1.66872 -1.37944  
C -4.39581 -0.23168 1.79729  
C -3.46269 -0.94051 2.81010  
H -3.56976 -2.03373 2.80493  
H -3.71377 -0.58848 3.82828  
H -2.40410 -0.69730 2.62375  
C -5.86424 -0.60579 2.09776  
H -6.57342 -0.12999 1.40340  
H -6.11617 -0.25593 3.11684  
H -6.04064 -1.69232 2.07911  
C -4.22010 1.28986 2.00980  
H -3.20772 1.64029 1.75069  
H -4.38443 1.51062 3.08128  
H -4.95185 1.88508 1.44233  
O 1.01200 -0.22908 -2.08646  
C -0.25326 -0.56399 -1.90691  
O -1.01599 -0.97663 -2.79042

**S<sub>P,H</sub>**

SCF (BP86) Energy = -2159.06112397  
Enthalpy 0K = -2157.901976  
Enthalpy 298K = -2157.901031  
Free Energy 298K = -2158.078758  
Lowest Frequency = 7.3330 cm<sup>-1</sup>  
Second Frequency = 9.9777 cm<sup>-1</sup>  
SCF (BP86-D3BJ) Energy = -2159.40024716  
SCF (C6H6) Energy = -2159.06749147  
SCF (BS2) Energy = -3306.05519267

Cu 2.50232 -0.01512 -0.07998  
P 4.74930 -0.01091 -0.01479  
Al -1.72058 0.00191 -0.00973  
Si -4.29315 1.84034 -0.74250  
Si -4.26122 -1.80429 0.88491

N -2.61511 1.61086 -0.14842  
 O -0.10933 0.16483 1.03310  
 O -0.16146 -0.17937 -1.12893  
 N -2.62403 -1.59663 0.17878  
 C -1.82978 2.78464 0.17266  
 C -1.09880 3.48315 -0.84076  
 C 0.59384 -0.01086 -0.06562  
 C -1.88177 -2.78163 -0.19810  
 C -1.91761 -3.24622 -1.55162  
 C -1.77077 3.25770 1.52253  
 C -0.99775 4.39491 1.82416  
 H -0.95587 4.74879 2.86116  
 C -1.10223 -3.50177 0.76271  
 C -1.10702 3.05329 -2.31010  
 H -1.68209 2.11428 -2.37251  
 C -0.34666 4.62131 -0.48577  
 H 0.20371 5.15758 -1.26819  
 C -1.19587 -4.40157 -1.90660  
 H -1.22827 -4.74944 -2.94599  
 C -0.28855 5.08283 0.83344  
 H 0.30023 5.97159 1.08641  
 C -2.70357 -2.51601 -2.64110  
 H -3.23398 -1.68412 -2.14501  
 C -2.51051 2.55782 2.66346  
 H -3.09766 1.74135 2.20729  
 C -0.44513 -5.11439 -0.96546  
 H 0.10200 -6.01725 -1.25869  
 C -0.99634 -3.07416 2.22889  
 H -1.54137 -2.12089 2.33134  
 C -0.40497 -4.65746 0.35597  
 H 0.18190 -5.21111 1.09884  
 C -4.46516 1.36726 -2.58481  
 H -3.93976 2.08218 -3.23878  
 H -5.52970 1.35860 -2.88042  
 H -4.05492 0.36357 -2.78944  
 C -5.56369 0.79163 0.23039  
 H -5.46094 1.02599 1.30720  
 H -6.54371 1.22172 -0.06575  
 C -5.58178 -0.73862 0.00097  
 H -5.55701 -0.97392 -1.08024  
 H -6.54461 -1.15571 0.36447  
 C 0.31435 2.76164 -2.84208  
 H 0.95277 3.66289 -2.80845  
 H 0.26857 2.42554 -3.89343  
 H 0.79590 1.96568 -2.25205  
 C 5.41729 -1.72107 -0.69477  
 C 5.43398 1.45906 -1.11097  
 C -4.29802 -1.32624 2.73352  
 H -3.73104 -2.04206 3.35075  
 H -5.33824 -1.30877 3.10541  
 H -3.86712 -0.32461 2.90333  
 C -1.80170 4.10498 -3.20657  
 H -2.83568 4.30547 -2.87960  
 H -1.83622 3.76127 -4.25613  
 H -1.25731 5.06629 -3.18861  
 C -4.80091 3.66142 -0.52066  
 H -4.92948 3.91534 0.54462  
 H -5.76362 3.84241 -1.02984  
 H -4.05554 4.35661 -0.93847  
 C -1.76044 -1.91089 -3.70717  
 H -1.21933 -2.70557 -4.25226  
 H -1.01110 -1.24783 -3.24582  
 H -2.33548 -1.33011 -4.45095  
 C -1.52367 1.92724 3.67373  
 H -0.92279 2.70675 4.17655  
 H -0.82798 1.23574 3.17213  
 H -2.07039 1.37193 4.45728  
 C -4.80666 -3.61810 0.69736  
 H -4.99920 -3.87097 -0.35851  
 H -5.74118 -3.78478 1.26102  
 H -4.04856 -4.32360 1.07262  
 C 0.46672 -2.81907 2.65727

H 0.50378 -2.47596 3.70679  
 H 0.92840 -2.04112 2.02835  
 H 1.07594 -3.73813 2.58545  
 C -1.65021 -4.10861 3.17461  
 H -1.13359 -5.08360 3.11723  
 H -2.71027 -4.28184 2.92488  
 H -1.59864 -3.76553 4.22370  
 C -3.49768 3.49947 3.38867  
 H -4.05948 2.94847 4.16382  
 H -4.22617 3.94470 2.69023  
 H -2.97001 4.32989 3.89096  
 C -3.76467 -3.41997 -3.30715  
 H -4.35249 -2.84722 -4.04641  
 H -4.46518 -3.84164 -2.56668  
 H -3.29739 -4.26668 -3.84112  
 C 5.29854 0.23242 1.84903  
 C 5.26232 -1.75352 -2.23357  
 H 4.23241 -1.51768 -2.55076  
 H 5.48456 -2.77994 -2.57955  
 H 5.95931 -1.07909 -2.75424  
 C 5.16817 2.79959 -0.38623  
 H 4.11011 2.90977 -0.09453  
 H 5.40292 3.62195 -1.08715  
 H 5.79982 2.94354 0.50371  
 C 6.88394 -2.02954 -0.32656  
 H 7.58393 -1.26689 -0.70278  
 H 7.17175 -2.99548 -0.78248  
 H 7.03468 -2.12899 0.75974  
 C 4.48432 -2.82983 -0.14318  
 H 4.54656 -2.95409 0.94605  
 H 4.77402 -3.79318 -0.60304  
 H 3.42909 -2.63829 -0.40574  
 C 4.36440 1.30441 2.46817  
 H 4.50670 2.30778 2.04529  
 H 4.57614 1.36956 3.55183  
 H 3.30084 1.03179 2.35041  
 C 4.59110 1.49598 -2.41168  
 H 4.73713 0.61805 -3.05483  
 H 4.88775 2.38690 -2.99618  
 H 3.51273 1.58438 -2.19231  
 C 5.03129 -1.07567 2.63036  
 H 3.99138 -1.42374 2.51095  
 H 5.18717 -0.87183 3.70591  
 H 5.71471 -1.89313 2.35405  
 C 6.93513 1.35755 -1.45511  
 H 7.57362 1.33140 -0.55806  
 H 7.22821 2.24754 -2.04313  
 H 7.16916 0.47443 -2.07008  
 C 6.77407 0.64334 2.03831  
 H 7.47638 -0.09350 1.61769  
 H 6.98724 0.72163 3.12098  
 H 6.99905 1.62582 1.59465

**TS (S-E)<sub>P,H</sub>**

SCF (BP86) Energy = -2159.00385018  
 Enthalpy 0K = -2157.847208  
 Enthalpy 298K = -2157.846264  
 Free Energy 298K = -2158.024037  
 Lowest Frequency = -207.6444 cm<sup>-1</sup>  
 Second Frequency = 12.7026 cm<sup>-1</sup>  
 SCF (BP86-D3BJ) Energy = -2159.35566603  
 SCF (C6H6) Energy = -2159.00827403  
 SCF (BS2) Energy = -3306.00307793

Cu -2.22983 0.86518 -0.73461  
 P -4.29197 0.54152 0.01621  
 Al 1.47671 -0.11335 -0.02197  
 Si 3.48845 -2.65178 -0.41293  
 Si 4.25844 0.73965 1.42630  
 N 1.87472 -1.91839 -0.08296  
 O -0.14254 0.41957 -0.29588  
 O 0.07858 1.75759 -2.54734

N 2.84473 1.06801 0.36137  
 C 0.75242 -2.82490 0.03327  
 C 0.01128 -3.23644 -1.11764  
 C -0.74508 1.41757 -1.77983  
 C 2.65279 2.43726 -0.07934  
 C 3.23728 2.87945 -1.30739  
 C 0.38277 -3.33348 1.31860  
 C -0.70860 -4.21615 1.42719  
 H -0.98741 -4.60228 2.41419  
 C 1.88911 3.35862 0.70294  
 C 0.34602 -2.74836 -2.52769  
 H 1.16914 -2.01944 -2.43249  
 C -1.06713 -4.13003 -0.95726  
 H -1.62475 -4.45265 -1.84469  
 C 3.02902 4.20625 -1.73023  
 H 3.47099 4.53785 -2.67706  
 C -1.43428 -4.62146 0.30052  
 H -2.27011 -5.32265 0.40102  
 C 4.07873 1.95482 -2.18975  
 H 4.19908 1.00855 -1.63389  
 C 1.13349 -2.91465 2.58308  
 H 2.09097 -2.47748 2.25038  
 C 2.27301 5.10657 -0.97243  
 H 2.12330 6.13506 -1.31841  
 C 1.25584 2.97388 2.04154  
 H 1.48889 1.90966 2.21845  
 C 1.71402 4.67611 0.23551  
 H 1.12614 5.37951 0.83731  
 C 4.10276 -2.20737 -2.16279  
 H 3.48386 -2.68248 -2.94139  
 H 5.14391 -2.54874 -2.30357  
 H 4.08237 -1.11831 -2.33658  
 C 4.83544 -2.10814 0.83254  
 H 4.48084 -2.33754 1.85569  
 H 5.66524 -2.82324 0.65018  
 C 5.37331 -0.66073 0.75385  
 H 5.66398 -0.40788 -0.28351  
 H 6.30913 -0.57886 1.34539  
 C -0.84878 -2.02337 -3.18489  
 H -1.69800 -2.71104 -3.34884  
 H -0.56096 -1.60974 -4.16759  
 H -1.19570 -1.19121 -2.54974  
 C -5.19951 2.28055 0.00526  
 C -5.22476 -0.69028 -1.19127  
 C 3.70268 0.24280 3.18358  
 H 3.21334 1.08412 3.70175  
 H 4.57477 -0.06490 3.78808  
 H 2.99371 -0.60153 3.16896  
 C 0.83268 -3.90233 -3.43465  
 H 1.71389 -4.41326 -3.01182  
 H 1.10546 -3.52251 -4.43544  
 H 0.04278 -4.66269 -3.57073  
 C 3.35183 -4.54403 -0.25685  
 H 3.13829 -4.84805 0.78150  
 H 4.30918 -5.00625 -0.55492  
 H 2.55640 -4.96210 -0.89393  
 C 3.36438 1.63320 -3.52254  
 C 3.22880 2.54773 -4.12727  
 H 2.36376 1.20593 -3.35321  
 H 3.95862 0.91989 -4.12180  
 C 0.35942 -1.80992 3.33861  
 H -0.62084 -2.18581 3.68207  
 H 0.16831 -0.93618 2.69005  
 H 0.92077 -1.46318 4.22463  
 C 5.33216 2.30320 1.56460  
 H 5.83380 2.54244 0.61312  
 H 6.11257 2.14192 2.32885  
 H 4.74091 3.18524 1.85781  
 C -0.28242 3.10975 2.01057  
 H -0.71491 2.80601 2.98179  
 H -0.70150 2.46561 1.21951  
 H -0.59339 4.15236 1.81896

C 1.84910 3.79010 3.21297  
 H 1.64058 4.86861 3.09673  
 H 2.94370 3.67107 3.28174  
 H 1.40972 3.46819 4.17437  
 C 1.45596 -4.09244 3.52614  
 H 2.09158 -3.75014 4.36158  
 H 1.99050 -4.90037 2.99842  
 H 0.54448 -4.53029 3.97062  
 C 5.48821 2.52351 -2.46830  
 H 6.08872 1.79913 -3.04681  
 H 6.03272 2.75071 -1.53647  
 H 5.43949 3.45578 -3.05855  
 C -4.30226 -0.19436 1.83063  
 C -5.48781 2.69346 -1.45700  
 H -4.57954 2.64398 -2.08116  
 H -5.83470 3.74361 -1.45816  
 H -6.27883 2.09119 -1.92958  
 C -4.73209 -2.13275 -0.92855  
 H -3.63304 -2.21625 -0.96431  
 H -5.13884 -2.78382 -1.72488  
 H -5.08458 -2.53969 0.03135  
 C -6.51227 2.33162 0.81534  
 H -7.25745 1.60252 0.46072  
 H -6.95922 3.33814 0.70900  
 H -6.35189 2.16385 1.89189  
 C -4.19642 3.32524 0.55686  
 H -3.94941 3.18010 1.61697  
 H -4.64368 4.33199 0.45474  
 H -3.25429 3.31547 -0.01931  
 C -3.19749 -1.27895 1.87865  
 H -3.42442 -2.17180 1.28166  
 H -3.07807 -1.60861 2.92771  
 H -2.22549 -0.88560 1.53579  
 C -4.80056 -0.34272 -2.64084  
 H -5.14259 0.64667 -2.97295  
 H -5.24161 -1.09321 -3.32371  
 H -3.70427 -0.38087 -2.75912  
 C -3.86903 0.91023 2.82295  
 H -2.91790 1.38251 2.52488  
 H -3.70632 0.44062 3.81088  
 H -4.62969 1.69444 2.95962  
 C -6.76385 -0.65512 -1.07451  
 H -7.11724 -0.89368 -0.05917  
 H -7.19079 -1.41264 -1.75861  
 H -7.18851 0.31787 -1.36739  
 C -5.65058 -0.78662 2.29236  
 H -6.46762 -0.04804 2.27608  
 H -5.54620 -1.13950 3.33580  
 H -5.95912 -1.65547 1.68998

**Е<sub>P,H</sub>**

SCF (BP86) Energy = -2159.02752545  
 Enthalpy 0K = -2157.869523  
 Enthalpy 298K = -2157.868579  
 Free Energy 298K = -2158.049022  
 Lowest Frequency = 6.1781 cm<sup>-1</sup>  
 Second Frequency = 15.0510 cm<sup>-1</sup>  
 SCF (BP86-D3BJ) Energy = -2159.38620210  
 SCF (C6H6) Energy = -2159.03070066  
 SCF (BS2) Energy = -3306.02879797

Cu 1.77426 -0.71786 -0.63264  
 P 3.91357 -0.02589 0.14753  
 Al -1.36447 0.06439 0.14827  
 Si -3.85667 2.05313 -0.67909  
 Si -4.09381 -1.50725 1.04733  
 N -2.17613 1.70210 -0.13685  
 O 0.33468 0.00999 0.32411  
 O 2.01632 -2.60992 -2.92367  
 N -2.44596 -1.42758 0.33238  
 C -1.30409 2.84617 0.03268  
 C -0.58143 3.38943 -1.07297

C 1.83900 -1.88002 -2.03469  
 C -1.81337 -2.67552 -0.04138  
 C -1.88529 -3.12659 -1.39695  
 C -1.16805 3.44921 1.32215  
 C -0.31433 4.55753 1.47814  
 H -0.20940 5.01640 2.46773  
 C -1.11279 -3.46635 0.92104  
 C -0.67832 2.79335 -2.47784  
 H -1.40385 1.96426 -2.42725  
 C 0.25668 4.50321 -0.86671  
 H 0.80814 4.91938 -1.71853  
 C -1.22860 -4.31675 -1.76520  
 H -1.27735 -4.65445 -2.80664  
 C 0.39649 5.09039 0.39570  
 H 1.04894 5.95936 0.53479  
 C -2.64419 -2.33120 -2.45967  
 H -3.27804 -1.60752 -1.91761  
 C -1.90175 2.88591 2.53995  
 H -2.71594 2.24851 2.15171  
 C -0.52257 -5.08041 -0.82803  
 H -0.02165 -6.00616 -1.13150  
 C -1.01117 -3.05560 2.38983  
 H -1.63942 -2.15902 2.51746  
 C -0.47651 -4.65230 0.50376  
 H 0.06557 -5.25321 1.24371  
 C -4.15811 1.54692 -2.49620  
 H -3.61152 2.19650 -3.19896  
 H -5.23407 1.62420 -2.73524  
 H -3.84809 0.50609 -2.68844  
 C -5.18436 1.15909 0.36594  
 H -5.02938 1.40308 1.43422  
 H -6.12736 1.67438 0.08680  
 C -5.34767 -0.36554 0.16669  
 H -5.37414 -0.62069 -0.90972  
 H -6.33131 -0.69120 0.56568  
 C 0.66973 2.19548 -2.93735  
 H 1.44618 2.97646 -3.02701  
 H 0.56823 1.71006 -3.92486  
 H 1.02347 1.44057 -2.21199  
 C 4.94507 -1.65338 0.54167  
 C 4.88665 1.01344 -1.20735  
 C -4.09244 -0.99295 2.88808  
 H -3.62298 -1.75744 3.52859  
 H -5.12793 -0.84605 3.24412  
 H -3.55020 -0.04448 3.04583  
 C -1.19516 3.81799 -3.51256  
 H -2.17317 4.23534 -3.21856  
 H -1.30848 3.34666 -4.50527  
 H -0.49547 4.66513 -3.62652  
 C -4.18195 3.92040 -0.50851  
 H -4.14381 4.24324 0.54517  
 H -5.18691 4.15591 -0.90043  
 H -3.44676 4.52258 -1.06591  
 C -1.67179 -1.52108 -3.34783  
 H -0.98815 -2.19260 -3.89690  
 H -1.04645 -0.83723 -2.74450  
 H -2.22087 -0.91243 -4.08841  
 C -0.96170 1.97997 3.37047  
 H -0.13479 2.57224 3.80231  
 H -0.50330 1.19095 2.74773  
 H -1.50593 1.49929 4.20341  
 C -4.75054 -3.28519 0.88703  
 H -4.88212 -3.57031 -0.17017  
 H -5.73221 -3.36454 1.38572  
 H -4.07205 -4.02177 1.34600  
 C 0.43312 -2.64887 2.75341  
 H 0.49202 -2.30982 3.80371  
 H 0.76188 -1.82703 2.09508  
 H 1.12925 -3.49870 2.63355  
 C -1.53555 -4.14696 3.34876  
 H -0.92649 -5.06668 3.29209  
 H -2.57870 -4.42588 3.12186

H -1.49763 -3.79199 4.39412  
 C -2.53966 3.97073 3.43204  
 H -3.14144 3.50330 4.23117  
 H -3.20015 4.63767 2.85214  
 H -1.77917 4.60108 3.92638  
 C -3.56912 -3.20869 -3.32951  
 H -4.17226 -2.57716 -4.00532  
 H -4.26053 -3.80441 -2.70985  
 H -2.99890 -3.91096 -3.96298  
 C 3.76998 1.05569 1.77608  
 C 5.39799 -2.32282 -0.77712  
 H 4.55604 -2.49143 -1.46765  
 H 5.82418 -3.31412 -0.53329  
 H 6.17996 -1.75734 -1.30649  
 C 4.32076 2.45185 -1.25842  
 H 3.22363 2.46590 -1.35730  
 H 4.74204 2.95653 -2.14836  
 H 4.60034 3.05466 -0.38141  
 C 6.18159 -1.44622 1.44277  
 H 6.91015 -0.74446 1.00801  
 H 6.69622 -2.41735 1.57384  
 H 5.91423 -1.08580 2.44800  
 C 3.97085 -2.64922 1.21999  
 H 3.60920 -2.30787 2.19900  
 H 4.49586 -3.61108 1.37442  
 H 3.08920 -2.84886 0.58612  
 C 2.61965 2.06773 1.54356  
 H 2.86779 2.85371 0.81794  
 H 2.40932 2.57464 2.50407  
 H 1.69529 1.56228 1.21115  
 C 4.58907 0.38221 -2.59025  
 H 4.94316 -0.65324 -2.68769  
 H 5.09819 0.98136 -3.36877  
 H 3.50885 0.39916 -2.81145  
 C 3.31531 0.14324 2.93869  
 H 2.40195 -0.41756 2.68375  
 H 3.07209 0.78780 3.80383  
 H 4.09332 -0.56194 3.27096  
 C 6.41381 1.09253 -0.98999  
 H 6.67888 1.52723 -0.01386  
 H 6.85159 1.74360 -1.77067  
 H 6.90820 0.11255 -1.07577  
 C 5.05625 1.79940 2.19585  
 H 5.90536 1.12290 2.38192  
 H 4.85495 2.34254 3.13883  
 H 5.37024 2.55271 1.45645

**I<sub>P,A</sub>**

SCF (BP86) Energy = -2692.79918540  
 Enthalpy 0K = -2691.405628  
 Enthalpy 298K = -2691.404684  
 Free Energy 298K = -2691.596381  
 Lowest Frequency = 14.4745 cm<sup>-1</sup>  
 Second Frequency = 15.5302 cm<sup>-1</sup>  
 SCF (BP86-D3BJ) Energy = -2693.21033140  
 SCF (C6H6) Energy = -2692.80284619  
 SCF (BS2) Energy = -3268.63692961

P 4.61535 -0.04016 -0.55761  
 Al -0.09710 -0.00705 -0.13332  
 O -2.05753 0.00726 -1.00768  
 N -0.75925 1.80545 0.28809  
 N -0.79249 -1.80210 0.31037  
 C -2.79602 1.18476 -0.76277  
 C -2.06202 2.16312 -0.06707  
 C -2.74896 3.37504 0.18349  
 H -2.21324 4.17977 0.69568  
 C -4.10729 3.53911 -0.18121  
 C -4.79242 2.47699 -0.81070  
 H -5.84847 2.58439 -1.06198  
 C -4.13787 1.26168 -1.11408  
 C -4.77437 0.02674 -1.78851



C -4.15911 -1.21603 -1.10917  
 C -4.82804 -2.41674 -0.79875  
 H -5.88725 -2.51675 -1.04999  
 C -4.15910 -3.48820 -0.15790  
 C -2.80484 -3.34251 0.21147  
 H -2.27946 -4.14577 0.73194  
 C -2.09912 -2.13924 -0.05083  
 C -2.81374 -1.15802 -0.75635  
 C -4.94652 -4.78631 0.14108  
 C -6.15497 -4.45838 1.05819  
 H -5.81590 -4.03112 2.01743  
 H -6.73342 -5.37460 1.27513  
 H -6.84019 -3.73151 0.59114  
 C -5.46365 -5.39308 -1.19039  
 H -6.12254 -4.69286 -1.73052  
 H -6.03892 -6.31647 -0.99635  
 H -4.62366 -5.64676 -1.85974  
 C -4.08423 -5.85296 0.85130  
 H -3.21607 -6.15481 0.24028  
 H -4.69065 -6.75650 1.03685  
 H -3.71061 -5.49669 1.82657  
 C -4.38366 0.02039 -3.29810  
 H -3.28954 0.01025 -3.42820  
 H -4.78142 0.91983 -3.79919  
 H -4.79769 -0.87345 -3.79602  
 C -6.31038 0.03942 -1.67196  
 H -6.74373 -0.84396 -2.16959  
 H -6.72992 0.92683 -2.17412  
 H -6.63991 0.04467 -0.62005  
 C -4.81369 4.87414 0.15674  
 C -4.80862 5.08516 1.69442  
 H -3.78338 5.11820 2.09868  
 H -5.34499 4.26707 2.20519  
 H -5.30536 6.03730 1.95520  
 C -4.06327 6.05019 -0.52164  
 H -4.05578 5.93276 -1.61906  
 H -3.01647 6.11877 -0.18172  
 H -4.55592 7.01029 -0.28350  
 C -6.28127 4.90442 -0.32527  
 H -6.73470 5.87828 -0.07146  
 H -6.88957 4.12031 0.15790  
 H -6.35678 4.77617 -1.41905  
 C 0.12122 2.87891 0.65338  
 C 0.49208 3.07451 2.01743  
 C 1.35094 4.14446 2.34015  
 H 1.63473 4.30842 3.38471  
 C 1.84331 5.00851 1.35418  
 H 2.50418 5.83821 1.62863  
 C 1.48127 4.80633 0.01719  
 H 1.86816 5.48165 -0.75507  
 C 0.62407 3.75369 -0.35866  
 C 0.26061 3.58610 -1.83650  
 H -0.46310 2.75854 -1.91117  
 C 1.49269 3.18852 -2.67739  
 H 2.27203 3.97164 -2.64865  
 H 1.21083 3.03430 -3.73451  
 H 1.93056 2.24755 -2.29823  
 C -0.41685 4.84813 -2.41470  
 H -1.32412 5.10731 -1.84559  
 H -0.71031 4.67910 -3.46581  
 H 0.26059 5.72056 -2.39557  
 C -0.07634 2.18590 3.12526  
 H -0.28615 1.19922 2.67241  
 C 0.89661 1.96865 4.30043  
 H 1.87750 1.59907 3.95699  
 H 0.47882 1.22900 5.00439  
 H 1.06506 2.89637 4.87605  
 C -1.42524 2.74246 3.64087  
 H -1.28624 3.74503 4.08463  
 H -1.84772 2.08200 4.41893  
 H -2.16291 2.82714 2.82702  
 C 0.06200 -2.88743 0.70017

C 0.52054 -3.81530 -0.28469  
 C 1.33803 -4.88834 0.12035  
 H 1.68968 -5.60537 -0.63067  
 C 1.71337 -5.05260 1.45877  
 H 2.34563 -5.89658 1.75600  
 C 1.27475 -4.12953 2.41640  
 H 1.57217 -4.26228 3.46141  
 C 0.44827 -3.04350 2.06539  
 C -0.07704 -2.09353 3.14326  
 H -0.19106 -1.09948 2.67113  
 C -1.48188 -2.52964 3.62449  
 H -2.19745 -2.57889 2.78854  
 H -1.87546 -1.81886 4.37281  
 H -1.43526 -3.52833 4.09534  
 C 0.87229 -1.93527 4.34624  
 H 0.94173 -2.86244 4.94293  
 H 0.49638 -1.14872 5.02209  
 H 1.89245 -1.65670 4.03185  
 C 0.16775 -3.67083 -1.76751  
 H -0.55767 -2.84710 -1.86233  
 C -0.50054 -4.94046 -2.33865  
 H 0.17792 -5.81165 -2.30936  
 H -0.78957 -4.78146 -3.39243  
 H -1.41026 -5.19661 -1.77101  
 C 1.41146 -3.27734 -2.59547  
 H 1.83100 -2.32385 -2.22418  
 H 1.14746 -3.14720 -3.66042  
 H 2.19864 -4.05028 -2.53227  
 C 5.34107 -0.23241 -2.37363  
 C 6.82331 0.16840 -2.53489  
 H 7.49287 -0.42872 -1.89601  
 H 7.00230 1.23294 -2.31905  
 H 7.12900 -0.00408 -3.58471  
 C 5.16942 -1.69154 -2.85580  
 H 4.13197 -2.04676 -2.74451  
 H 5.84126 -2.39802 -2.34476  
 H 5.41722 -1.73010 -3.93338  
 C 4.45416 0.63542 -3.30166  
 H 4.78086 0.48622 -4.34841  
 H 4.51609 1.71084 -3.08656  
 H 3.39403 0.33557 -3.23327  
 C 5.25814 -1.53152 0.54043  
 C 4.38179 -2.75921 0.19011  
 H 4.53489 -3.12811 -0.83292  
 H 3.30724 -2.54384 0.31937  
 H 4.63668 -3.58492 0.88009  
 C 4.97943 -1.21760 2.02919  
 H 5.17223 -2.13397 2.61766  
 H 3.92622 -0.93499 2.19616  
 H 5.62908 -0.42732 2.43565  
 C 6.75093 -1.88459 0.37052  
 H 7.41810 -1.04453 0.61891  
 H 6.99074 -2.22300 -0.64966  
 H 7.00089 -2.71866 1.05380  
 C 5.27370 1.64232 0.21171  
 C 6.74245 1.62149 0.68632  
 H 7.44832 1.38069 -0.12398  
 H 6.91045 0.91133 1.51116  
 H 7.00770 2.62613 1.06759  
 C 5.09431 2.78350 -0.81620  
 H 5.31349 3.74131 -0.30854  
 H 4.05809 2.84379 -1.18638  
 H 5.77872 2.70832 -1.67520  
 C 4.34148 1.98672 1.40076  
 H 4.61630 2.98571 1.78730  
 H 4.42031 1.27724 2.23585  
 H 3.28386 2.03543 1.08843  
 Cu 2.27312 -0.03198 -0.49795

**TS (I-II) P,A**

SCF (BP86) Energy = -2881.38067951  
 Enthalpy OK = -2879.972160

Enthalpy 298K = -2879.971216  
 Free Energy 298K = -2880.169396  
 Lowest Frequency = -145.5530 cm<sup>-1</sup>  
 Second Frequency = 9.8776 cm<sup>-1</sup>  
 SCF (BP86-D3BJ) Energy = -2881.81364980  
 SCF (C6H6) Energy = -2881.38424136  
 SCF (BS2) Energy = -3457.27980629

P 4.55999 -0.01868 -0.30968  
 Al -0.13676 -0.01255 -0.22800  
 O -2.09422 0.00580 -0.98133  
 N -0.74066 1.79788 0.25861  
 N -0.77649 -1.80609 0.27732  
 C -2.80690 1.20153 -0.75108  
 C -2.04270 2.17653 -0.08573  
 C -2.70444 3.40393 0.15761  
 H -2.14835 4.20814 0.64809  
 C -4.06717 3.58460 -0.18495  
 C -4.78491 2.52017 -0.77172  
 H -5.84495 2.63880 -0.99968  
 C -4.15743 1.28766 -1.06172  
 C -4.83391 0.03977 -1.66881  
 C -4.21310 -1.18628 -0.96400  
 C -4.88788 -2.36086 -0.57690  
 H -5.95930 -2.44914 -0.77504  
 C -4.20990 -3.41927 0.07533  
 C -2.83360 -3.29263 0.36335  
 H -2.29966 -4.08757 0.88761  
 C -2.11537 -2.12134 0.00948  
 C -2.85230 -1.14355 -0.67486  
 C -5.00943 -4.68233 0.47540  
 C -6.15520 -4.28183 1.44281  
 H -5.75175 -3.82091 2.36069  
 H -6.74194 -5.17169 1.73427  
 H -6.84848 -3.55885 0.98159  
 C -5.61625 -5.33328 -0.79598  
 H -6.28779 -4.64050 -1.33005  
 H -6.20194 -6.23107 -0.52762  
 H -4.82264 -5.63959 -1.49903  
 C -4.13361 -5.73916 1.18400  
 H -3.30925 -6.09089 0.53994  
 H -4.75019 -6.61710 1.44393  
 H -3.69700 -5.35053 2.12003  
 C -4.49414 -0.03004 -3.18915  
 H -3.40570 -0.05798 -3.35605  
 H -4.89952 0.85447 -3.71027  
 H -4.93628 -0.93667 -3.63735  
 C -6.36449 0.08058 -1.50013  
 H -6.82694 -0.81434 -1.94852  
 H -6.78836 0.95444 -2.02191  
 H -6.65792 0.13134 -0.43870  
 C -4.74096 4.94309 0.12578  
 C -4.69727 5.20733 1.65433  
 H -3.66290 5.23878 2.03487  
 H -5.23524 4.41719 2.20588  
 H -5.17274 6.17619 1.89196  
 C -3.98471 6.08062 -0.60955  
 H -4.00306 5.92481 -1.70201  
 H -2.92968 6.14102 -0.29458  
 H -4.45475 7.05741 -0.39483  
 C -6.21858 4.98540 -0.32386  
 H -6.64796 5.97548 -0.09202  
 H -6.82982 4.22913 0.19842  
 H -6.32172 4.82337 -1.41083  
 C 0.10552 2.84964 0.75382  
 C 0.28854 3.02380 2.15871  
 C 1.09791 4.08555 2.61121  
 H 1.23549 4.23274 3.68779  
 C 1.71819 4.96422 1.71528  
 H 2.33735 5.78721 2.08915  
 C 1.52949 4.79105 0.33915  
 H 2.00401 5.48698 -0.36264

C 0.72641 3.74908 -0.16574  
 C 0.52046 3.63931 -1.67750  
 H -0.10787 2.75315 -1.86350  
 C 1.85512 3.41982 -2.41905  
 H 2.54216 4.27590 -2.29113  
 H 1.68279 3.29093 -3.50247  
 H 2.36597 2.51584 -2.04246  
 C -0.22069 4.87101 -2.24499  
 H -1.20110 5.00271 -1.76014  
 H -0.39052 4.75141 -3.32956  
 H 0.36325 5.79735 -2.09727  
 C -0.42338 2.13134 3.17681  
 H -0.71398 1.20494 2.64916  
 C 0.47076 1.74260 4.37150  
 H 1.41265 1.27227 4.04319  
 H -0.06181 1.02975 5.02456  
 H 0.72849 2.61581 4.99684  
 C -1.72562 2.79771 3.68251  
 H -1.50158 3.74878 4.19899  
 H -2.24702 2.13764 4.39837  
 H -2.41565 3.01262 2.85129  
 C 0.06136 -2.91220 0.65427  
 C 0.42218 -3.89593 -0.31934  
 C 1.18936 -5.00553 0.08825  
 H 1.45636 -5.76853 -0.65211  
 C 1.61764 -5.15058 1.41146  
 H 2.20885 -6.02346 1.70972  
 C 1.28233 -4.17099 2.35462  
 H 1.62137 -4.28905 3.38816  
 C 0.50371 -3.04934 2.00607  
 C 0.09344 -2.03643 3.07917  
 H 0.10631 -1.03501 2.60575  
 C -1.35356 -2.29182 3.56533  
 H -2.07537 -2.26160 2.73502  
 H -1.65196 -1.53226 4.30977  
 H -1.42594 -3.28407 4.04622  
 C 1.04642 -1.99531 4.28982  
 H 0.98635 -2.92130 4.88927  
 H 0.77034 -1.16308 4.95759  
 H 2.09844 -1.85530 3.98852  
 C -0.00162 -3.80506 -1.78867  
 H -0.54124 -2.85265 -1.92368  
 C -0.96307 -4.95094 -2.18116  
 H -0.47254 -5.93572 -2.07934  
 H -1.28032 -4.84284 -3.23335  
 H -1.86635 -4.94841 -1.55066  
 C 1.21818 -3.79047 -2.73791  
 H 1.89972 -2.95555 -2.50959  
 H 0.88623 -3.68278 -3.78580  
 H 1.79571 -4.72957 -2.66976  
 C 5.69726 0.22916 -1.89616  
 C 7.17368 0.56242 -1.58921  
 H 7.66636 -0.20603 -0.97407  
 H 7.29134 1.53465 -1.08560  
 H 7.72856 0.62584 -2.54484  
 C 5.64078 -1.04572 -2.77071  
 H 4.60459 -1.34457 -2.99521  
 H 6.17272 -1.89984 -2.32457  
 H 6.13605 -0.82357 -3.73472  
 C 5.07975 1.36406 -2.75046  
 H 5.68422 1.47453 -3.67096  
 H 5.07167 2.33921 -2.24550  
 H 4.05110 1.11908 -3.05638  
 C 4.97635 -1.76386 0.48191  
 C 4.21484 -2.82449 -0.35003  
 H 4.57313 -2.91190 -1.38462  
 H 3.13176 -2.61241 -0.37424  
 H 4.33930 -3.81151 0.13218  
 C 4.37776 -1.82784 1.90587  
 H 4.44793 -2.87138 2.26407  
 H 3.30855 -1.55819 1.91018  
 H 4.91311 -1.19503 2.63043

C 6.47490 -2.12636 0.55200  
H 7.06194 -1.39929 1.13472  
H 6.93453 -2.22163 -0.44399  
H 6.57857 -3.10920 1.05003  
C 4.98694 1.38580 0.99308  
C 6.31414 1.19186 1.75824  
H 7.18813 1.14379 1.09038  
H 6.31231 0.28868 2.38822  
H 6.46259 2.05541 2.43430  
C 5.01766 2.75729 0.27954  
H 5.08406 3.54573 1.05190  
H 4.09470 2.94665 -0.29268  
H 5.88617 2.87974 -0.38582  
C 3.80970 1.44862 1.99769  
H 3.97115 2.30529 2.67801  
H 3.71814 0.54560 2.61672  
H 2.84690 1.61358 1.48417  
Cu 2.22486 -0.01550 -0.72003  
C 1.03036 -0.05705 -3.04532  
O -0.11341 0.26042 -3.20335  
O 2.14895 -0.39022 -3.33487

## II<sub>P,A</sub>

SCF (BP86) Energy = -2881.41502890  
Enthalpy 0K = -2880.004826  
Enthalpy 298K = -2880.003882  
Free Energy 298K = -2880.198706  
Lowest Frequency = 15.5124 cm<sup>-1</sup>  
Second Frequency = 18.9508 cm<sup>-1</sup>  
SCF (BP86-D3BJ) Energy = -2881.84581709  
SCF (C6H6) Energy = -2881.42057691  
SCF (BS2) Energy = -3457.31262663

P 4.67105 0.03516 -0.01930  
Al -0.39816 0.00634 -0.70499  
O -2.38031 -0.01748 -1.06778  
N -0.83588 1.78912 -0.08280  
N -0.79001 -1.77279 -0.04045  
C -3.05496 1.16181 -0.70303  
C -2.18890 2.15100 -0.20329  
C -2.81488 3.37797 0.12266  
H -2.19346 4.20430 0.47940  
C -4.22024 3.53843 0.01515  
C -5.02080 2.45087 -0.39748  
H -6.10550 2.55813 -0.43755  
C -4.43920 1.21673 -0.76586  
C -5.18964 -0.05033 -1.24002  
C -4.41521 -1.27969 -0.70805  
C -4.96802 -2.50090 -0.27428  
H -6.05295 -2.63350 -0.29134  
C -4.14316 -3.55682 0.18502  
C -2.74348 -3.37614 0.25479  
H -2.10178 -4.16976 0.64141  
C -2.14164 -2.15190 -0.13657  
C -3.02836 -1.19777 -0.65836  
C -4.80824 -4.88462 0.62100  
C -5.79960 -4.60929 1.78302  
H -5.27489 -4.18348 2.65542  
H -6.28954 -5.54728 2.10094  
H -6.59152 -3.90037 1.48915  
C -5.58180 -5.49025 -0.58048  
H -6.36312 -4.80604 -0.95129  
H -6.07284 -6.43531 -0.28590  
H -4.89896 -5.70585 -1.42012  
C -3.78182 -5.93184 1.10658  
H -3.05786 -6.19615 0.31673  
H -4.30769 -6.85726 1.39898  
H -3.21762 -5.57805 1.98655  
C -5.16936 -0.08718 -2.79898  
H -4.13793 -0.08619 -3.18638  
H -5.69140 0.79510 -3.20778  
H -5.67407 -0.99770 -3.16547

C -6.65279 -0.05331 -0.75630  
H -7.17816 -0.95288 -1.11723  
H -7.19646 0.81657 -1.16011  
H -6.71910 -0.02714 0.34373  
C -4.84201 4.91532 0.35579  
C -4.49588 5.31067 1.81504  
H -3.40762 5.38831 1.97372  
H -4.89012 4.56809 2.53000  
H -4.93918 6.29223 2.06198  
C -4.27133 5.98701 -0.61070  
H -4.51065 5.73963 -1.65921  
H -3.17506 6.07029 -0.52648  
H -4.70309 6.97888 -0.38485  
C -6.38093 4.91793 0.21603  
H -6.77277 5.91937 0.46466  
H -6.85778 4.19545 0.90100  
H -6.70104 4.68258 -0.81367  
C 0.05306 2.82412 0.37942  
C 0.25779 3.01820 1.77973  
C 1.11001 4.05961 2.20008  
H 1.26560 4.22303 3.27236  
C 1.74465 4.90002 1.27820  
H 2.39715 5.70822 1.62690  
C 1.52270 4.71472 -0.09181  
H 2.00006 5.38955 -0.81095  
C 0.67557 3.69343 -0.56844  
C 0.38566 3.60348 -2.06892  
H -0.09882 2.63125 -2.25700  
C 1.65991 3.66412 -2.93578  
H 2.16174 4.64624 -2.86718  
H 1.40254 3.50052 -3.99611  
H 2.38304 2.88743 -2.64343  
C -0.60274 4.71284 -2.50372  
H -1.55368 4.64611 -1.95163  
H -0.82720 4.62451 -3.58133  
H -0.17198 5.71562 -2.32876  
C -0.47110 2.18186 2.83570  
H -0.92100 1.31744 2.31581  
C 0.46933 1.64413 3.93362  
H 1.27706 1.02284 3.51629  
H -0.10190 1.02712 4.64889  
H 0.93463 2.46117 4.51307  
C -1.61999 2.98526 3.49096  
H -1.22810 3.87758 4.01203  
H -2.14743 2.36395 4.23640  
H -2.35639 3.31750 2.74394  
C 0.11979 -2.83586 0.30768  
C 0.53400 -3.76173 -0.69893  
C 1.34171 -4.85440 -0.32278  
H 1.65108 -5.57473 -1.08852  
C 1.74566 -5.04005 1.00265  
H 2.36397 -5.90199 1.27716  
C 1.35106 -4.11783 1.98011  
H 1.67131 -4.27006 3.01527  
C 0.53686 -3.01116 1.66414  
C 0.07401 -2.06450 2.77760  
H -0.02350 -1.05762 2.32860  
C -1.31920 -2.46129 3.32437  
H -2.08573 -2.47271 2.53561  
H -1.64027 -1.75168 4.10762  
H -1.27973 -3.46877 3.77705  
C 1.06296 -1.97029 3.95731  
H 1.11661 -2.91716 4.52343  
H 0.72952 -1.19453 4.66545  
H 2.08499 -1.71438 3.63115  
C 0.10053 -3.64153 -2.16258  
H -0.43527 -2.68529 -2.27788  
C -0.87171 -4.77927 -2.55517  
H -0.38416 -5.76756 -2.47189  
H -1.20225 -4.65561 -3.60139  
H -1.76685 -4.78256 -1.91234  
C 1.30784 -3.61397 -3.12680

|    |         |          |          |   |          |          |          |
|----|---------|----------|----------|---|----------|----------|----------|
| H  | 1.99268 | -2.78232 | -2.89745 | C | -4.50374 | -1.25981 | -1.35522 |
| H  | 0.95846 | -3.47934 | -4.16498 | C | -5.16253 | -2.49068 | -1.15715 |
| H  | 1.88188 | -4.55736 | -3.08966 | H | -6.18792 | -2.61058 | -1.51649 |
| C  | 5.74927 | 0.53461  | -1.58491 | C | -4.52422 | -3.57036 | -0.49922 |
| C  | 7.21402 | 0.89267  | -1.25134 | C | -3.21698 | -3.40656 | 0.01005  |
| H  | 7.75323 | 0.07278  | -0.75218 | H | -2.72198 | -4.21661 | 0.54931  |
| H  | 7.29911 | 1.79402  | -0.62448 | C | -2.52784 | -2.17528 | -0.13147 |
| H  | 7.74565 | 1.10802  | -2.19737 | C | -3.20181 | -1.18987 | -0.87269 |
| C  | 5.72795 | -0.61298 | -2.62236 | C | -5.29403 | -4.90309 | -0.33724 |
| H  | 4.69752 | -0.90368 | -2.88424 | C | -6.59249 | -4.65437 | 0.47571  |
| H  | 6.29467 | -1.50093 | -2.30328 | H | -6.35802 | -4.26640 | 1.48177  |
| H  | 6.20602 | -0.23997 | -3.54745 | H | -7.15934 | -5.59560 | 0.59374  |
| C  | 5.05454 | 1.73511  | -2.27342 | H | -7.25374 | -3.92383 | -0.01942 |
| H  | 5.65327 | 2.01975  | -3.15936 | C | -5.66482 | -5.45744 | -1.73860 |
| H  | 4.96807 | 2.62509  | -1.63599 | H | -6.29345 | -4.75061 | -2.30548 |
| H  | 4.05251 | 1.44802  | -2.63091 | H | -6.22483 | -6.40531 | -1.64280 |
| C  | 5.15801 | -1.78314 | 0.51932  | H | -4.75830 | -5.65372 | -2.33657 |
| C  | 4.41915 | -2.74760 | -0.44116 | C | -4.46746 | -5.98000 | 0.39979  |
| H  | 4.75030 | -2.66733 | -1.48490 | H | -3.53593 | -6.22426 | -0.13924 |
| H  | 3.32721 | -2.58998 | -0.41222 | H | -5.05837 | -6.90886 | 0.48161  |
| H  | 4.60459 | -3.78580 | -0.10949 | H | -4.19999 | -5.66499 | 1.42300  |
| C  | 4.59924 | -2.06880 | 1.93081  | C | -4.59235 | -0.00731 | -3.54203 |
| H  | 4.74174 | -3.14351 | 2.14724  | H | -3.49180 | -0.00424 | -3.59760 |
| H  | 3.51579 | -1.87466 | 1.98536  | H | -4.96574 | 0.89024  | -4.06481 |
| H  | 5.11016 | -1.50477 | 2.72638  | H | -4.96103 | -0.90363 | -4.07029 |
| C  | 6.67187 | -2.08678 | 0.51038  | C | -6.62407 | -0.01929 | -2.04531 |
| H  | 7.24377 | -1.42241 | 1.17697  | H | -7.01396 | -0.90471 | -2.57405 |
| H  | 7.11156 | -2.02730 | -0.49706 | H | -7.02144 | 0.86535  | -2.56966 |
| H  | 6.82483 | -3.12268 | 0.86774  | H | -7.02045 | -0.02352 | -1.01678 |
| C  | 5.05383 | 1.27874  | 1.44143  | C | -5.27327 | 4.89891  | -0.28958 |
| C  | 6.39390 | 1.03007  | 2.16688  | C | -5.39054 | 5.20085  | 1.22805  |
| H  | 7.26107 | 1.10404  | 1.49263  | H | -4.40126 | 5.26110  | 1.71124  |
| H  | 6.42977 | 0.05028  | 2.66782  | H | -5.96962 | 4.41464  | 1.74228  |
| H  | 6.51991 | 1.79924  | 2.95213  | H | -5.90274 | 6.16650  | 1.39062  |
| C  | 5.02761 | 2.73239  | 0.91439  | C | -4.45782 | 6.02816  | -0.97314 |
| H  | 5.08491 | 3.41186  | 1.78503  | H | -4.36832 | 5.84766  | -2.05830 |
| H  | 4.08890 | 2.96777  | 0.38583  | H | -3.43864 | 6.10468  | -0.55945 |
| H  | 5.87931 | 2.97168  | 0.25977  | H | -4.95439 | 7.00472  | -0.82787 |
| C  | 3.87986 | 1.16323  | 2.44239  | C | -6.69739 | 4.90891  | -0.88870 |
| H  | 4.03029 | 1.89973  | 3.25368  | H | -7.16245 | 5.89605  | -0.72219 |
| H  | 3.79586 | 0.17133  | 2.90759  | H | -7.34773 | 4.15214  | -0.41668 |
| H  | 2.92029 | 1.40231  | 1.95380  | H | -6.68645 | 4.72549  | -1.97715 |
| Cu | 2.44534 | 0.03588  | -0.68184 | C | -0.45172 | 2.88343  | 0.85285  |
| C  | 1.33348 | -0.02295 | -2.27471 | C | -0.38753 | 3.14847  | 2.25027  |
| O  | 0.03227 | -0.01580 | -2.50007 | C | 0.40370  | 4.22306  | 2.70307  |
| O  | 2.21148 | -0.06663 | -3.15108 | H | 0.44849  | 4.43791  | 3.77676  |

### Sp,A

SCF (BP86) Energy = -2881.45587901  
 Enthalpy 0K = -2880.046112  
 Enthalpy 298K = -2880.045168  
 Free Energy 298K = -2880.245067  
 Lowest Frequency = 5.6688 cm<sup>-1</sup>  
 Second Frequency = 9.9661 cm<sup>-1</sup>  
 SCF (BP86-D3BJ) Energy = -2881.86081190  
 SCF (C6H6) Energy = -2881.46331606  
 SCF (BS2) Energy = -3457.35499786

|    |          |          |          |   |          |          |          |
|----|----------|----------|----------|---|----------|----------|----------|
| P  | 5.73791  | -0.01470 | -0.49496 | C | -0.50862 | 4.57418  | -2.30725 |
| Al | -0.70285 | 0.00212  | 0.06446  | H | -1.54051 | 4.66364  | -1.93080 |
| O  | -2.44889 | -0.00413 | -1.01136 | H | -0.55636 | 4.37066  | -3.39190 |
| N  | -1.27810 | 1.81579  | 0.35206  | H | -0.00799 | 5.54982  | -2.16949 |
| N  | -1.28613 | -1.80430 | 0.39227  | C | -1.17023 | 2.31937  | 3.26726  |
| C  | -3.21109 | 1.17535  | -0.87254 | H | -1.57477 | 1.44338  | 2.72946  |
| C  | -2.53519 | 2.17346  | -0.14472 | C | -0.26739 | 1.80286  | 4.40715  |
| C  | -3.23643 | 3.39169  | 0.00405  | H | 0.57529  | 1.21350  | 4.01034  |
| H  | -2.74836 | 4.21104  | 0.53999  | H | -0.84552 | 1.16132  | 5.09429  |
| C  | -4.55359 | 3.54427  | -0.49592 | H | 0.14836  | 2.63146  | 5.00781  |
| C  | -5.18445 | 2.46308  | -1.14938 | C | -2.37123 | 3.11241  | 3.83259  |
| H  | -6.20979 | 2.56794  | -1.50654 | H | -2.03222 | 4.01955  | 4.36492  |
| C  | -4.51253 | 1.23464  | -1.34912 | H | -2.94419 | 2.49587  | 4.54791  |
| C  | -5.08292 | -0.01300 | -2.06177 | H | -3.05662 | 3.42557  | 3.02792  |
|    |          |          |          | C | -0.46451 | -2.85582 | 0.93328  |

C 0.27699 -3.69491 0.04814  
 C 1.04777 -4.74096 0.59347  
 H 1.60950 -5.39714 -0.08161  
 C 1.10739 -4.95837 1.97410  
 H 1.70848 -5.78008 2.37935  
 C 0.39299 -4.11712 2.83569  
 H 0.44730 -4.28736 3.91577  
 C -0.39842 -3.06119 2.34272  
 C -1.19380 -2.18746 3.31433  
 H -1.35260 -1.21271 2.81747  
 C -2.59074 -2.79233 3.59473  
 H -3.17123 -2.91811 2.66685  
 H -3.16762 -2.14033 4.27481  
 H -2.49408 -3.78291 4.07535  
 C -0.45261 -1.92703 4.64086  
 H -0.35809 -2.84518 5.24794  
 H -1.01432 -1.19901 5.25043  
 H 0.55910 -1.52376 4.46986  
 C 0.25056 -3.51060 -1.47123  
 H -0.29519 -2.57662 -1.68354  
 C -0.49749 -4.67070 -2.16857  
 H 0.00962 -5.63634 -1.99028  
 H -0.53517 -4.50704 -3.26031  
 H -1.53294 -4.75464 -1.80038  
 C 1.66953 -3.35190 -2.06131  
 H 2.19672 -2.50208 -1.59442  
 H 1.61048 -3.16057 -3.14735  
 H 2.27836 -4.26241 -1.91536  
 C 6.33354 -0.46930 -2.30293  
 C 7.80973 -0.13054 -2.60062  
 H 8.50662 -0.64357 -1.91923  
 H 8.01463 0.95047 -2.55235  
 H 8.05179 -0.45920 -3.62885  
 C 6.10115 -1.97841 -2.55102  
 H 5.06238 -2.27887 -2.33353  
 H 6.78537 -2.62206 -1.97720  
 H 6.28467 -2.18312 -3.62212  
 C 5.40430 0.28014 -3.29248  
 H 5.64305 -0.05288 -4.31993  
 H 5.52384 1.37144 -3.26467  
 H 4.34186 0.04790 -3.10173  
 C 6.39798 -1.34265 0.78270  
 C 5.48939 -2.59294 0.65812  
 H 5.58656 -3.11173 -0.30478  
 H 4.42518 -2.33734 0.80365  
 H 5.77158 -3.31127 1.45045  
 C 6.19660 -0.80619 2.21960  
 H 6.41503 -1.62758 2.92687  
 H 5.15576 -0.48792 2.39927  
 H 6.87260 0.02542 2.47062  
 C 7.87666 -1.74167 0.59220  
 H 8.56108 -0.88263 0.67337  
 H 8.05976 -2.23756 -0.37407  
 H 8.15698 -2.46285 1.38287  
 C 6.38820 1.76562 -0.00410  
 C 7.87962 1.81992 0.38942  
 H 8.54365 1.47378 -0.41836  
 H 8.10013 1.23030 1.29308  
 H 8.15198 2.86839 0.61392  
 C 6.13822 2.74050 -1.17885  
 H 6.35631 3.76574 -0.82665  
 H 5.08673 2.72611 -1.51166  
 H 6.78965 2.55144 -2.04586  
 C 5.50922 2.26898 1.17019  
 H 5.78371 3.31799 1.38848  
 H 5.64396 1.69508 2.09656  
 H 4.43612 2.25160 0.91114  
 Cu 3.49105 -0.00947 -0.40652  
 C 1.59072 -0.00563 -0.22658  
 O 1.01647 0.01037 0.95348  
 O 0.72503 -0.01801 -1.22101

**TS (S-E)<sub>P,A</sub>**

SCF (BP86) Energy = -2881.39731620  
 Enthalpy 0K = -2879.990049  
 Enthalpy 298K = -2879.989105  
 Free Energy 298K = -2880.189370  
 Lowest Frequency = -214.8819 cm<sup>-1</sup>  
 Second Frequency = 5.2396 cm<sup>-1</sup>  
 SCF (BP86-D3BJ) Energy = -2881.81499226  
 SCF (C6H6) Energy = -2881.40233751  
 SCF (BS2) Energy = -3457.30259026

P 5.13862 -0.07189 -0.33731  
 Al -0.46603 -0.00762 -0.21495  
 O -2.29976 0.04926 -1.08641  
 N -0.97311 1.77750 0.30135  
 N -1.07782 -1.76719 0.27710  
 C -3.02017 1.23394 -0.78788  
 C -2.27119 2.16866 -0.05021  
 C -2.94687 3.37376 0.25402  
 H -2.40365 4.15067 0.79982  
 C -4.30448 3.56504 -0.10221  
 C -5.00291 2.53788 -0.77494  
 H -6.05835 2.66710 -1.01810  
 C -4.36141 1.33051 -1.13178  
 C -5.00693 0.12427 -1.85231  
 C -4.41139 -1.14878 -1.20946  
 C -5.09490 -2.34709 -0.92329  
 H -6.15268 -2.43375 -1.18471  
 C -4.43960 -3.43444 -0.29399  
 C -3.09128 -3.30396 0.10453  
 H -2.58209 -4.11749 0.62501  
 C -2.37305 -2.10293 -0.12929  
 C -3.06852 -1.11954 -0.85015  
 C -5.23642 -4.73613 -0.03824  
 C -6.45590 -4.42671 0.87054  
 H -6.12875 -4.02675 1.84559  
 H -7.04088 -5.34577 1.05508  
 H -7.13193 -3.68493 0.41357  
 C -5.73730 -5.30505 -1.39261  
 H -6.38695 -4.58878 -1.92267  
 H -6.31775 -6.23120 -1.23034  
 H -4.88921 -5.54383 -2.05704  
 C -4.38771 -5.82552 0.65368  
 H -3.51100 -6.11103 0.04730  
 H -4.99939 -6.73224 0.80246  
 H -4.02923 -5.50101 1.64569  
 C -4.60699 0.16479 -3.35891  
 H -3.51294 0.14483 -3.48582  
 H -4.99159 1.08556 -3.83033  
 H -5.03041 -0.70597 -3.88848  
 C -6.54301 0.15065 -1.74206  
 H -6.98306 -0.71027 -2.27196  
 H -6.94935 1.05950 -2.21581  
 H -6.87830 0.12353 -0.69229  
 C -4.99508 4.89283 0.29226  
 C -4.97431 5.04639 1.83657  
 H -3.94569 5.05531 2.23325  
 H -5.51457 4.21545 2.32192  
 H -5.45955 5.99294 2.13594  
 C -4.23857 6.08514 -0.35020  
 H -4.24695 6.01046 -1.45130  
 H -3.18638 6.12782 -0.02351  
 H -4.71668 7.04061 -0.06832  
 C -6.46670 4.95436 -0.17424  
 H -6.90863 5.92139 0.12201  
 H -7.07780 4.15732 0.28368  
 H -6.55377 4.87066 -1.27146  
 C -0.06433 2.82494 0.69137  
 C 0.28587 2.99579 2.06358  
 C 1.14308 4.05725 2.41665  
 H 1.41392 4.20298 3.46674  
 C 1.64897 4.93860 1.45336

H 2.30263 5.76553 1.75225  
 C 1.31601 4.75169 0.10785  
 H 1.72024 5.43441 -0.64827  
 C 0.47258 3.69978 -0.30151  
 C 0.16800 3.54264 -1.79282  
 H -0.38248 2.59583 -1.92339  
 C 1.45873 3.44420 -2.63486  
 H 2.03971 4.38331 -2.60365  
 H 1.21169 3.24085 -3.69127  
 H 2.10435 2.62711 -2.27250  
 C -0.72585 4.68966 -2.31876  
 H -1.67972 4.73995 -1.77014  
 H -0.95339 4.54094 -3.38914  
 H -0.21820 5.66589 -2.21613  
 C -0.27853 2.07496 3.14839  
 H -0.39006 1.06982 2.69801  
 C 0.64351 1.94150 4.37641  
 H 1.67060 1.65697 4.08982  
 H 0.25372 1.17061 5.06087  
 H 0.70012 2.88245 4.95216  
 C -1.68858 2.52877 3.59599  
 H -1.64357 3.53800 4.04380  
 H -2.09625 1.83882 4.35625  
 H -2.39292 2.56106 2.75025  
 C -0.26752 -2.82847 0.81781  
 C 0.42701 -3.70963 -0.06519  
 C 1.18822 -4.75816 0.48810  
 H 1.71578 -5.44519 -0.18310  
 C 1.27623 -4.94623 1.87243  
 H 1.86930 -5.77180 2.28132  
 C 0.59352 -4.07677 2.72993  
 H 0.65593 -4.23139 3.81254  
 C -0.18544 -3.01417 2.22902  
 C -0.95824 -2.12658 3.20605  
 H -1.25282 -1.21463 2.65557  
 C -2.25930 -2.81750 3.68088  
 H -2.91868 -3.05848 2.83183  
 H -2.81792 -2.16134 4.37189  
 H -2.02950 -3.75675 4.21589  
 C -0.11115 -1.70029 4.42250  
 H 0.14576 -2.55937 5.06722  
 H -0.67744 -0.98869 5.04803  
 H 0.83079 -1.21649 4.11485  
 C 0.34042 -3.57765 -1.58644  
 H -0.11851 -2.59980 -1.80821  
 C -0.56318 -4.67760 -2.19352  
 H -0.14712 -5.68258 -1.99761  
 H -0.64209 -4.55204 -3.28790  
 H -1.58031 -4.63979 -1.77111  
 C 1.72856 -3.59860 -2.25960  
 H 2.38164 -2.81339 -1.84029  
 H 1.62978 -3.41321 -3.34312  
 H 2.23456 -4.57275 -2.13510  
 C 6.28302 1.33886 -1.07431  
 C 7.46733 1.74606 -0.17177  
 H 8.13943 0.90268 0.05173  
 H 7.13880 2.18652 0.78255  
 H 8.06663 2.51590 -0.69374  
 C 6.82479 0.88905 -2.45113  
 H 6.01331 0.55265 -3.11846  
 H 7.58114 0.09234 -2.37996  
 H 7.31215 1.75745 -2.93240  
 C 5.38021 2.56752 -1.34896  
 H 5.98714 3.34597 -1.84894  
 H 4.95183 3.01306 -0.44152  
 H 4.54801 2.30438 -2.02464  
 C 6.03395 -1.80535 -0.53147  
 C 5.86900 -2.26027 -2.00370  
 H 6.41785 -1.63274 -2.71871  
 H 4.80774 -2.26997 -2.30496  
 H 6.25965 -3.29099 -2.09851  
 C 5.29739 -2.85384 0.33476

H 5.70459 -3.85210 0.08782  
 H 4.21416 -2.88070 0.12999  
 H 5.44739 -2.70168 1.41432  
 C 7.53016 -1.79935 -0.15111  
 H 7.70177 -1.47806 0.88808  
 H 8.13236 -1.15798 -0.81374  
 H 7.92765 -2.82731 -0.24865  
 C 4.79684 0.28082 1.56013  
 C 5.97020 -0.04341 2.50835  
 H 6.88455 0.51960 2.26276  
 H 6.21919 -1.11632 2.52163  
 H 5.68067 0.23219 3.54004  
 C 4.40161 1.76654 1.72736  
 H 4.05039 1.91383 2.76536  
 H 3.56865 2.05330 1.06427  
 H 5.24199 2.46072 1.57147  
 C 3.54545 -0.54537 1.95428  
 H 3.25390 -0.25793 2.98252  
 H 3.71705 -1.63013 1.95778  
 H 2.69265 -0.33444 1.28467  
 Cu 3.20326 -0.09036 -1.41523  
 C 1.70075 -0.10893 -2.58097  
 O 1.16464 -0.04612 -0.77923  
 O 0.82267 -0.13723 -3.36627

**E<sub>P,A</sub>**

SCF (BP86) Energy = -2881.41731184  
 Enthalpy 0K = -2880.008764  
 Enthalpy 298K = -2880.007820  
 Free Energy 298K = -2880.207458  
 Lowest Frequency = 12.6741 cm<sup>-1</sup>  
 Second Frequency = 14.4994 cm<sup>-1</sup>  
 SCF (BP86-D3BJ) Energy = -2881.83942324  
 SCF (C6H6) Energy = -2881.42144881  
 SCF (BS2) Energy = -3457.32535258

P 4.83787 0.03978 -0.30533  
 Al -0.37593 0.04024 -0.05196  
 O -2.17462 -0.03017 -1.06320  
 N -1.06109 1.78716 0.39601  
 N -0.92915 -1.75664 0.39445  
 C -2.99160 1.10220 -0.81631  
 C -2.35668 2.08692 -0.03769  
 C -3.12884 3.24499 0.21659  
 H -2.67400 4.05595 0.79291  
 C -4.47135 3.34387 -0.22304  
 C -5.05482 2.27203 -0.93455  
 H -6.09929 2.32915 -1.24381  
 C -4.31226 1.11057 -1.24456  
 C -4.83049 -0.13734 -1.99517  
 C -4.19502 -1.36341 -1.30219  
 C -4.82020 -2.59815 -1.03910  
 H -5.85304 -2.75275 -1.36178  
 C -4.14088 -3.63386 -0.35126  
 C -2.82903 -3.41541 0.12233  
 H -2.30517 -4.18755 0.68931  
 C -2.17209 -2.17496 -0.08772  
 C -2.88057 -1.24344 -0.86285  
 C -4.87508 -4.97495 -0.11222  
 C -6.16128 -4.71897 0.71796  
 H -5.91486 -4.27953 1.69969  
 H -6.70189 -5.66684 0.89176  
 H -6.85130 -4.02837 0.20513  
 C -5.26277 -5.59931 -1.47913  
 H -5.91943 -4.93249 -2.06244  
 H -5.79876 -6.55382 -1.32878  
 H -4.36517 -5.80263 -2.08809  
 C -4.00779 -5.99835 0.65347  
 H -3.08238 -6.24606 0.10549  
 H -4.57467 -6.93565 0.78963  
 H -3.72659 -5.63181 1.65562  
 C -4.33853 -0.07827 -3.47349

H -3.23942 -0.02646 -3.52913  
H -4.75100 0.81275 -3.97742  
H -4.66865 -0.97772 -4.02127  
C -6.36889 -0.21169 -1.98434  
H -6.71676 -1.10206 -2.53387  
H -6.80243 0.66663 -2.49050  
H -6.76844 -0.25630 -0.95797  
C -5.27773 4.61681 0.13068  
C -5.37885 4.74775 1.67402  
H -4.38394 4.81891 2.14378  
H -5.89439 3.87472 2.10979  
H -5.94767 5.65477 1.94761  
C -4.56181 5.86813 -0.44179  
H -4.48158 5.80898 -1.54095  
H -3.54354 5.98117 -0.03413  
H -5.12663 6.78354 -0.18888  
C -6.71230 4.58516 -0.44217  
H -7.23846 5.51774 -0.17439  
H -7.30056 3.74505 -0.03420  
H -6.71303 4.50621 -1.54321  
C -0.23568 2.89716 0.79431  
C 0.10540 3.08027 2.16672  
C 0.91949 4.17406 2.52199  
H 1.18911 4.32518 3.57156  
C 1.38682 5.07906 1.56080  
H 2.01291 5.92668 1.86056  
C 1.04495 4.89311 0.21713  
H 1.41234 5.59939 -0.53660  
C 0.24037 3.81183 -0.19255  
C -0.07877 3.65956 -1.68215  
H -0.72799 2.77711 -1.80126  
C 1.19957 3.39672 -2.50719  
H 1.90864 4.24101 -2.43886  
H 0.94989 3.25279 -3.57380  
H 1.70689 2.48722 -2.14252  
C -0.84704 4.87993 -2.23631  
H -1.78687 5.04241 -1.68457  
H -1.09804 4.72581 -3.30067  
H -0.24486 5.80345 -2.16697  
C -0.43271 2.13632 3.24434  
H -0.45986 1.12070 2.80480  
C 0.44591 2.07591 4.50850  
H 1.49845 1.84912 4.26758  
H 0.07544 1.29163 5.18891  
H 0.42226 3.02630 5.07111  
C -1.88677 2.50044 3.62931  
H -1.92642 3.51509 4.06512  
H -2.27908 1.79304 4.38159  
H -2.55639 2.47661 2.75548  
C -0.06973 -2.77239 0.94307  
C 0.63562 -3.65146 0.06761  
C 1.45988 -4.64770 0.62682  
H 1.99710 -5.33250 -0.03974  
C 1.60103 -4.78394 2.01258  
H 2.24555 -5.56618 2.42850  
C 0.90365 -3.91908 2.86414  
H 1.00892 -4.03530 3.94763  
C 0.05869 -2.91202 2.35635  
C -0.74627 -2.03696 3.31898  
H -0.97713 -1.09486 2.78820  
C -2.09972 -2.70156 3.67033  
H -2.70224 -2.89228 2.76811  
H -2.68757 -2.05330 4.34436  
H -1.93506 -3.66606 4.18405  
C 0.01759 -1.68231 4.60989  
H 0.18433 -2.56836 5.24797  
H -0.56920 -0.96543 5.20942  
C 0.99972 -1.22942 4.39451  
H 0.50937 -3.56675 -1.45489  
H -0.09106 -2.67189 -1.68929  
C -0.22544 -4.79837 -2.03383  
H 0.33419 -5.72885 -1.82936

H -0.33398 -4.70520 -3.12901  
H -1.23278 -4.90089 -1.59914  
C 1.88112 -3.39272 -2.13918  
H 2.39303 -2.49019 -1.75620  
H 1.75766 -3.28032 -3.23101  
H 2.54207 -4.26085 -1.96680  
C 5.85312 1.59967 -0.94342  
C 6.98439 2.07579 -0.00660  
H 7.73501 1.29339 0.18508  
H 6.60521 2.43472 0.96247  
H 7.50854 2.92620 -0.48330  
C 6.45460 1.30168 -2.33699  
H 5.69341 0.93886 -3.04711  
H 7.28400 0.57849 -2.30851  
H 6.86144 2.24506 -2.74726  
C 4.83548 2.74863 -1.15362  
H 5.37175 3.62665 -1.56153  
H 4.32662 3.06628 -0.23403  
H 4.05920 2.46519 -1.88429  
C 5.92242 -1.57098 -0.60476  
C 5.79226 -1.96292 -2.09752  
H 6.20213 -1.21232 -2.78698  
H 4.74047 -2.14499 -2.37248  
H 6.34896 -2.90446 -2.26446  
C 5.32749 -2.74575 0.20662  
H 5.82822 -3.67762 -0.11752  
H 4.24641 -2.87355 0.03336  
H 5.49799 -2.64669 1.28923  
C 7.41505 -1.42251 -0.23636  
H 7.56261 -1.13811 0.81680  
H 7.93837 -0.68738 -0.86735  
H 7.91913 -2.39591 -0.38933  
C 4.51344 0.23535 1.61682  
C 5.74156 0.00975 2.52416  
H 6.57723 0.69098 2.30089  
H 6.11643 -1.02503 2.47517  
H 5.44009 0.19099 3.57344  
C 3.93784 1.64877 1.86740  
H 3.60664 1.69992 2.92139  
H 3.05297 1.84680 1.24004  
H 4.67610 2.45351 1.72689  
C 3.38729 -0.75937 1.99629  
H 3.09205 -0.55031 3.04257  
H 3.69535 -1.81275 1.95600  
H 2.50226 -0.61861 1.35047  
Cu 2.77822 0.00740 -1.48188  
C 2.88238 -0.01002 -3.29770  
O 1.29672 0.11204 -0.35629  
O 3.04944 -0.01811 -4.45022

**I<sub>Ag</sub>**

SCF (BP86) Energy = -1980.65898404  
Enthalpy 0K = -1979.589925  
Enthalpy 298K = -1979.588981  
Free Energy 298K = -1979.756815  
Lowest Frequency = 14.4813 cm<sup>-1</sup>  
Second Frequency = 14.6261 cm<sup>-1</sup>  
SCF (BP86-D3BJ) Energy = -1980.97621804  
SCF (C6H6) Energy = -1980.66337131  
SCF (BS2) Energy = -2792.75258057

Ag -1.47245 0.00043 -0.00031  
Si 3.69735 1.68141 -1.02813  
Si 3.69701 -1.68145 1.02902  
Al 1.01352 -0.00010 0.00016  
N 2.03758 1.54478 -0.35498  
N 2.03746 -1.54484 0.35522  
N -4.50990 -0.84977 -0.66636  
N -4.51008 0.85012 0.66538  
C 1.30726 2.77884 -0.18523  
C 0.55179 3.35390 -1.25779  
C -0.14141 4.56257 -1.04392

H -0.71050 5.00153 -1.87239  
 C -0.11770 5.21545 0.19337  
 H -0.65722 6.15856 0.33476  
 C 0.61186 4.64938 1.24573  
 H 0.63520 5.15595 2.21775  
 C 1.32849 3.44883 1.08081  
 C 0.46990 2.70703 -2.64180  
 H 1.04947 1.76942 -2.59400  
 C -0.98144 2.33549 -3.01811  
 H -1.41682 1.65557 -2.26329  
 H -1.01082 1.82860 -3.99965  
 H -1.62625 3.23044 -3.08397  
 C 1.09433 3.60275 -3.73619  
 H 0.54444 4.55568 -3.83696  
 H 1.06448 3.09671 -4.71793  
 H 2.14560 3.84991 -3.51218  
 C 2.09713 2.87324 2.27063  
 H 2.75712 2.08575 1.86668  
 C 1.13058 2.19977 3.27187  
 H 0.42292 2.93790 3.69086  
 H 1.68247 1.74110 4.11212  
 H 0.53443 1.41109 2.77786  
 C 2.98502 3.91373 2.98541  
 H 3.67509 4.40939 2.28166  
 H 3.58942 3.42702 3.77111  
 H 2.38699 4.70208 3.47649  
 C 4.22134 3.51332 -1.07517  
 H 3.49657 4.14269 -1.61593  
 H 5.19992 3.60717 -1.57804  
 H 4.32259 3.92759 -0.05793  
 C 3.80391 0.96673 -2.79735  
 H 3.39729 -0.05767 -2.84620  
 H 4.85615 0.92488 -3.13173  
 H 3.24586 1.58390 -3.52034  
 C 5.01595 0.77201 0.01612  
 H 5.98049 1.15405 -0.37979  
 H 4.96521 1.14296 1.05764  
 C 5.01567 -0.77273 -0.01571  
 H 5.98035 -1.15518 0.37941  
 H 4.96395 -1.14360 -1.05722  
 C 3.80307 -0.96601 2.79792  
 H 3.39866 0.05930 2.84579  
 H 4.85506 -0.92626 3.13336  
 H 3.24295 -1.58160 3.52064  
 C 4.22090 -3.51336 1.07709  
 H 3.49555 -4.14280 1.61698  
 H 5.19885 -3.60691 1.58126  
 H 4.32364 -3.92774 0.06004  
 C 1.30726 -2.77899 0.18530  
 C 0.55137 -3.35394 1.25760  
 C -0.14159 -4.56275 1.04359  
 H -0.71101 -5.00164 1.87187  
 C -0.11720 -5.21581 -0.19357  
 H -0.65652 -6.15902 -0.33509  
 C 0.61277 -4.64981 -1.24569  
 H 0.63662 -5.15654 -2.21762  
 C 1.32914 -3.44913 -1.08065  
 C 0.46874 -2.70691 2.64150  
 H 1.04809 -1.76915 2.59382  
 C -0.98285 -2.33567 3.01713  
 H -1.41793 -1.65576 2.26214  
 H -1.01279 -1.82886 3.99869  
 H -1.62755 -3.23073 3.08262  
 C 1.09296 -3.60235 3.73622  
 H 0.54338 -4.55548 3.83677  
 H 1.06246 -3.09628 4.71793  
 H 2.14443 -3.84911 3.51272  
 C 2.09811 -2.87349 -2.27021  
 H 2.75791 -2.08594 -1.86608  
 C 1.13178 -2.20010 -3.27173  
 H 0.42413 -2.93824 -3.69073  
 H 1.68386 -1.74158 -4.11195

H 0.53558 -1.41129 -2.77794  
 C 2.98625 -3.91392 -2.98476  
 H 3.67585 -4.40987 -2.28076  
 H 3.59116 -3.42708 -3.77000  
 H 2.38838 -4.70204 -3.47641  
 C -3.66537 0.00047 -0.00076  
 C -4.05724 -1.96791 -1.53997  
 H -4.98780 -2.43205 -1.90804  
 C -3.27155 -1.43782 -2.74911  
 H -3.85551 -0.68798 -3.30823  
 H -3.02814 -2.27176 -3.42825  
 H -2.32528 -0.97229 -2.42250  
 C -3.27583 -3.01678 -0.73559  
 H -2.32933 -2.59895 -0.35155  
 H -3.02596 -3.87445 -1.38107  
 H -3.86725 -3.38322 0.11983  
 C -5.85746 -0.54285 -0.42511  
 C -7.00828 -1.29752 -1.01536  
 H -7.01211 -1.26181 -2.11969  
 H -7.95874 -0.86022 -0.67234  
 H -7.01102 -2.36106 -0.71588  
 C -5.85757 0.54215 0.42513  
 C -7.00856 1.29604 1.01605  
 H -7.01170 1.26038 2.12039  
 H -7.95892 0.85808 0.67362  
 H -7.01220 2.35956 0.71653  
 C -4.05764 1.96836 1.53896  
 H -4.98828 2.43281 1.90643  
 C -3.27552 3.01688 0.73484  
 H -2.32896 2.59874 0.35130  
 H -3.02568 3.87453 1.38037  
 H -3.86644 3.38343 -0.12089  
 C -3.27273 1.43823 2.74860  
 H -3.85728 0.68877 3.30764  
 H -3.02923 2.27219 3.42768  
 H -2.32653 0.97218 2.42250

**TS (I-II)<sub>Ag</sub>**

SCF (BP86) Energy = -1980.64548523  
 Enthalpy 0K = -1979.577262  
 Enthalpy 298K = -1979.576318  
 Free Energy 298K = -1979.741061  
 Lowest Frequency = -59.0677 cm<sup>-1</sup>  
 Second Frequency = 12.1966 cm<sup>-1</sup>  
 SCF (BP86-D3BJ) Energy = -1980.96229533  
 SCF (C6H6) Energy = -1980.64987732  
 SCF (BS2) Energy = -2792.73949398

Ag 1.35510 -0.43713 -0.22668  
 Si -3.05344 2.45706 1.29555  
 Si -4.16591 -0.75040 -0.73366  
 Al -1.04588 0.13126 0.01726  
 N -1.56842 1.88991 0.46368  
 N -2.46854 -1.07413 -0.24616  
 N 4.18074 -1.74497 0.40114  
 N 4.53728 0.18918 -0.52179  
 C -0.53612 2.86450 0.20372  
 C 0.46273 3.17588 1.18250  
 C 1.46639 4.11593 0.87106  
 H 2.22077 4.35685 1.63008  
 C 1.51678 4.75396 -0.37357  
 H 2.30004 5.48889 -0.59086  
 C 0.54144 4.45056 -1.33127  
 H 0.57041 4.95112 -2.30631  
 C -0.48613 3.52517 -1.06661  
 C 0.47878 2.53226 2.57028  
 H -0.34069 1.79383 2.59150  
 C 1.79482 1.77134 2.84360  
 H 1.96543 0.99989 2.07075  
 H 1.75726 1.27343 3.82938  
 H 2.66554 2.45205 2.84703  
 C 0.22037 3.57070 3.68646



H 1.01875 4.33395 3.71516  
H 0.19260 3.08072 4.67639  
H -0.73676 4.09896 3.54104  
C -1.51566 3.22911 -2.15770  
H -2.32907 2.65980 -1.67495  
C -0.90906 2.32892 -3.25864  
H -0.06648 2.83641 -3.76242  
H -1.66259 2.07766 -4.02669  
H -0.52179 1.38518 -2.83368  
C -2.13031 4.50397 -2.77362  
H -2.56083 5.16113 -1.99909  
H -2.93422 4.23842 -3.48262  
H -1.38373 5.09453 -3.33414  
C -3.05990 4.36169 1.36770  
H -2.13350 4.76708 1.80523  
H -3.90971 4.71002 1.98063  
H -3.16809 4.79930 0.36092  
C -3.16918 1.76784 3.07433  
H -3.04252 0.67182 3.09137  
H -4.15691 1.99722 3.51304  
H -2.39972 2.20441 3.73187  
C -4.66309 1.94425 0.39972  
H -5.44742 2.56006 0.88831  
H -4.62193 2.30731 -0.64500  
C -5.06940 0.45358 0.44585  
H -6.13858 0.34980 0.16462  
H -5.00435 0.06054 1.47839  
C -4.27205 0.01007 -2.48366  
H -3.60994 0.88659 -2.58584  
H -5.30407 0.34385 -2.69429  
H -3.98891 -0.71698 -3.26224  
C -5.15479 -2.37912 -0.71694  
H -4.68006 -3.15874 -1.33422  
H -6.17178 -2.20298 -1.10926  
H -5.25136 -2.78068 0.30575  
C -2.05460 -2.45645 -0.18299  
C -1.56534 -3.14215 -1.34069  
C -1.15553 -4.48594 -1.22443  
H -0.78737 -5.00746 -2.11627  
C -1.21096 -5.16875 -0.00448  
H -0.89384 -6.21551 0.06153  
C -1.68769 -4.49841 1.12864  
H -1.73767 -5.02937 2.08646  
C -2.11659 -3.15912 1.06345  
C -1.47767 -2.47267 -2.71375  
H -1.82339 -1.43258 -2.58823  
C -0.02666 -2.41525 -3.24050  
H 0.62143 -1.86227 -2.53588  
H 0.01170 -1.90239 -4.21860  
H 0.39801 -3.42634 -3.37561  
C -2.39844 -3.16183 -3.74692  
H -2.08924 -4.20707 -3.92691  
H -2.36142 -2.63296 -4.71625  
H -3.44826 -3.18163 -3.40876  
C -2.61773 -2.47387 2.33545  
H -3.12414 -1.54686 2.01425  
C -1.43350 -2.06266 3.24023  
H -0.86423 -2.95070 3.56954  
H -1.78638 -1.52977 4.14169  
H -0.73232 -1.40066 2.69995  
C -3.63706 -3.32189 3.12501  
H -4.48230 -3.63563 2.48918  
H -4.04320 -2.74212 3.97260  
H -3.17962 -4.23519 3.54561  
C 3.54293 -0.73131 -0.26195  
C 3.52001 -2.98525 0.89694  
H 4.35323 -3.65778 1.16256  
C 2.70122 -2.69820 2.16577  
H 3.32150 -2.22506 2.94552  
H 2.28912 -3.63873 2.56731  
H 1.85755 -2.02456 1.93192  
C 2.69362 -3.66667 -0.20173

H 1.81672 -3.05811 -0.48006  
H 2.32252 -4.63648 0.16816  
H 3.30085 -3.84130 -1.10523  
C 5.53357 -1.46080 0.60722  
C 6.47519 -2.38669 1.31452  
H 6.13295 -2.63079 2.33590  
H 7.47031 -1.92522 1.40394  
H 6.60926 -3.34005 0.77139  
C 5.76698 -0.22667 0.03739  
C 7.05897 0.53520 0.09127  
H 7.55804 0.63040 -0.88723  
H 7.75484 0.00666 0.76143  
H 6.92669 1.54941 0.50506  
C 4.26995 1.48002 -1.25229  
H 3.97514 2.22248 -0.48679  
C 3.11464 1.33316 -2.25475  
H 3.34191 0.55767 -3.00610  
H 2.97677 2.29902 -2.76689  
H 2.15415 1.08353 -1.77254  
C 5.49929 2.00459 -2.01891  
H 6.29816 2.39206 -1.37417  
H 5.16922 2.83973 -2.65707  
H 5.91649 1.22587 -2.68038

**II<sub>Ag</sub>**

SCF (BP86) Energy = -1980.65869698  
Enthalpy 0K = -1979.589454  
Enthalpy 298K = -1979.588509  
Free Energy 298K = -1979.757555  
Lowest Frequency = 11.3936 cm<sup>-1</sup>  
Second Frequency = 13.3361 cm<sup>-1</sup>  
SCF (BP86-D3BJ) Energy = -1980.97233857  
SCF (C6H6) Energy = -1980.66317581  
SCF (BS2) Energy = -2792.75257409

Ag 1.39043 -0.27016 0.09854  
Si -3.47087 2.14505 1.00897  
Si -3.95724 -1.21223 -1.02207  
Al -1.06767 0.06314 0.03782  
N -1.84666 1.75270 0.35538  
N -2.29671 -1.31260 -0.34628  
N 4.39950 -1.40511 0.55821  
N 4.41714 0.50563 -0.46016  
C -0.92123 2.84472 0.17339  
C -0.09051 3.30847 1.24480  
C 0.80496 4.37227 1.01399  
H 1.42940 4.72873 1.84217  
C 0.91205 4.98600 -0.23930  
H 1.60473 5.82140 -0.39224  
C 0.10822 4.52740 -1.29024  
H 0.18392 5.00496 -2.27429  
C -0.80937 3.47512 -1.10830  
C -0.13967 2.69419 2.64517  
H -0.86066 1.86006 2.60548  
C 1.22526 2.10656 3.06739  
H 1.56454 1.34659 2.33968  
H 1.15096 1.62673 4.06007  
H 2.00253 2.88952 3.13229  
C -0.63535 3.70859 3.70150  
H 0.05730 4.56474 3.79091  
H -0.70565 3.23269 4.69614  
H -1.62928 4.11282 3.44625  
C -1.65193 3.01352 -2.29761  
H -2.43167 2.34727 -1.88918  
C -0.80014 2.18254 -3.28482  
H 0.01703 2.79370 -3.70935  
H -1.41481 1.80777 -4.12304  
H -0.33839 1.31470 -2.77987  
C -2.35709 4.17522 -3.02942  
H -2.96492 4.78079 -2.33596  
H -3.02475 3.78395 -3.81723  
H -1.63657 4.85376 -3.52021

C -3.71699 4.03501 1.02123  
 H -2.90122 4.55945 1.54415  
 H -4.66587 4.28570 1.52715  
 H -3.76424 4.43845 -0.00436  
 C -3.69425 1.47723 2.78561  
 H -3.43596 0.40629 2.84938  
 H -4.74492 1.58734 3.10922  
 H -3.06151 2.01806 3.50824  
 C -4.89906 1.42014 -0.03568  
 H -5.80105 1.94320 0.34631  
 H -4.78744 1.76563 -1.08120  
 C -5.12422 -0.10827 0.01521  
 H -6.13576 -0.34943 -0.37412  
 H -5.12451 -0.47069 1.06091  
 C -3.96404 -0.50424 -2.79740  
 H -3.41011 0.44803 -2.85633  
 H -5.00031 -0.30939 -3.12765  
 H -3.50791 -1.20294 -3.51763  
 C -4.73664 -2.95086 -1.05653  
 H -4.10972 -3.67623 -1.59970  
 H -5.72214 -2.90974 -1.55283  
 H -4.88711 -3.34341 -0.03683  
 C -1.73111 -2.63262 -0.19378  
 C -1.05059 -3.28171 -1.27375  
 C -0.50715 -4.56698 -1.07425  
 H 0.00553 -5.06145 -1.90826  
 C -0.60901 -5.22576 0.15596  
 H -0.18564 -6.22788 0.28677  
 C -1.26710 -4.58892 1.21493  
 H -1.35135 -5.09987 2.18122  
 C -1.83497 -3.30946 1.06429  
 C -0.89251 -2.63313 -2.65050  
 H -1.36392 -1.63733 -2.59359  
 C 0.59183 -2.42080 -3.02259  
 H 1.09644 -1.79109 -2.26706  
 H 0.67835 -1.91994 -4.00391  
 H 1.13562 -3.38058 -3.08730  
 C -1.61235 -3.44212 -3.75379  
 H -1.17040 -4.44826 -3.86775  
 H -1.52919 -2.93060 -4.72959  
 H -2.68393 -3.57575 -3.52892  
 C -2.52996 -2.65928 2.26120  
 H -3.09012 -1.79333 1.86694  
 C -1.49122 -2.11910 3.27142  
 H -0.87943 -2.94217 3.68322  
 H -1.98625 -1.60676 4.11616  
 H -0.80137 -1.40325 2.78820  
 C -3.53668 -3.59488 2.96334  
 H -4.27915 -3.99739 2.25351  
 H -4.08054 -3.04901 3.75439  
 H -3.03702 -4.45400 3.44554  
 C 3.56963 -0.42496 0.08556  
 C 3.92525 -2.63181 1.25560  
 H 4.84447 -3.18117 1.52087  
 C 3.18380 -2.27214 2.55265  
 H 3.80798 -1.64285 3.20859  
 H 2.91985 -3.19378 3.09749  
 H 2.25148 -1.72587 2.32740  
 C 3.08436 -3.50974 0.31687  
 H 2.14662 -3.00177 0.03427  
 H 2.81716 -4.45082 0.82488  
 H 3.64044 -3.75410 -0.60347  
 C 5.74585 -1.10372 0.31121  
 C 6.88553 -1.98665 0.71647  
 H 6.94677 -2.11642 1.81217  
 H 7.83927 -1.54555 0.38828  
 H 6.81688 -2.99250 0.26472  
 C 5.76060 0.11365 -0.34013  
 C 6.94491 0.90131 -0.81207  
 H 6.85140 1.21185 -1.86597  
 H 7.85526 0.28657 -0.73369  
 H 7.11104 1.81211 -0.21063

C 3.88035 1.73201 -1.11242  
 H 2.80139 1.68358 -0.87501  
 C 4.02824 1.67216 -2.64116  
 H 5.08087 1.73408 -2.96538  
 H 3.49037 2.52279 -3.09135  
 H 3.59291 0.74117 -3.03857  
 C 4.43571 3.02408 -0.49423  
 H 4.39350 2.98309 0.60605  
 H 3.80794 3.86891 -0.82077  
 H 5.47269 3.23312 -0.80434

**TS (II-III)<sub>Ag</sub>**

SCF (BP86) Energy = -2169.23116833  
 Enthalpy 0K = -2168.146672  
 Enthalpy 298K = -2168.145727  
 Free Energy 298K = -2168.319315  
 Lowest Frequency = -189.8566 cm<sup>-1</sup>  
 Second Frequency = 9.6639 cm<sup>-1</sup>  
 SCF (BP86-D3BJ) Energy = -2169.56663609  
 SCF (C6H6) Energy = -2169.23541627  
 SCF (BS2) Energy = -2981.38560288

Ag 1.36802 -0.36868 -0.30004  
 Si -3.87615 -0.93822 1.25288  
 Si -3.35640 2.43018 -0.76976  
 Al -1.09628 0.09899 -0.20068  
 N -2.32344 -1.21578 0.38116  
 N -1.71335 1.87951 -0.28044  
 N 4.33806 0.45413 0.44220  
 N 4.39587 -1.61513 -0.19677  
 O -1.22820 -0.24539 -2.66285  
 O 0.87788 -1.15825 -3.19912  
 C -1.83688 -2.57927 0.34736  
 C -2.11022 -3.42664 -0.77888  
 C -1.64223 -4.75651 -0.77435  
 H -1.86668 -5.39872 -1.63379  
 C -0.90820 -5.27849 0.29509  
 H -0.56047 -6.31730 0.27779  
 C -0.63543 -4.45404 1.39125  
 H -0.06781 -4.85628 2.23910  
 C -1.08564 -3.11999 1.44467  
 C -2.91285 -2.96132 -1.99807  
 H -3.02767 -1.86824 -1.91173  
 C -2.19529 -3.27765 -3.33180  
 H -1.13670 -2.97380 -3.32421  
 H -2.69750 -2.76264 -4.16914  
 H -2.21975 -4.35963 -3.55439  
 C -4.32636 -3.58788 -2.04012  
 H -4.26755 -4.69055 -2.07756  
 H -4.87254 -3.24935 -2.93882  
 H -4.92413 -3.31566 -1.15757  
 C -0.77907 -2.31771 2.71190  
 H -1.20880 -1.31150 2.57372  
 C 0.73686 -2.14305 2.94828  
 H 1.24198 -3.11692 3.08160  
 H 0.92028 -1.54380 3.85845  
 H 1.21170 -1.62555 2.09421  
 C -1.43903 -2.95520 3.95704  
 H -2.52517 -3.08968 3.82119  
 H -1.27932 -2.32427 4.84985  
 H -1.00890 -3.94971 4.17265  
 C -4.78230 -2.58726 1.57925  
 H -5.36938 -2.93413 0.71445  
 H -5.48512 -2.43974 2.41836  
 H -4.08659 -3.39543 1.85697  
 C -3.67931 -0.14495 2.98331  
 H -3.26341 -0.85903 3.71208  
 H -4.67777 0.15782 3.34920  
 H -3.04034 0.75107 2.98418  
 C -5.04663 0.20110 0.26045  
 H -5.09400 -0.15368 -0.78643  
 H -6.05224 -0.00345 0.68374

C -4.75782 1.71921 0.32144  
 H -4.58827 2.04089 1.36665  
 H -5.65479 2.28316 -0.01158  
 C -3.77631 1.94674 -2.56844  
 H -3.11227 2.44168 -3.29547  
 H -4.81454 2.24438 -2.80134  
 H -3.69434 0.85951 -2.72975  
 C -3.47211 4.32416 -0.58896  
 H -3.39303 4.63057 0.46768  
 H -4.44844 4.67195 -0.96980  
 H -2.68054 4.85183 -1.14397  
 C -0.73269 2.91520 -0.04237  
 C 0.01136 3.50702 -1.11555  
 C 0.92982 4.54028 -0.83857  
 H 1.47961 4.99582 -1.67100  
 C 1.15171 5.00220 0.46359  
 H 1.85800 5.81836 0.65349  
 C 0.44010 4.41559 1.51679  
 H 0.59848 4.77400 2.54093  
 C -0.50047 3.39246 1.28954  
 C -0.14333 3.06130 -2.57025  
 H -0.87951 2.24196 -2.58069  
 C 1.18708 2.51055 -3.13344  
 H 1.95884 3.29971 -3.18678  
 H 1.04689 2.11483 -4.15543  
 H 1.58213 1.69801 -2.49846  
 C -0.67407 4.19301 -3.47981  
 H -1.64926 4.57374 -3.13376  
 H -0.79975 3.83019 -4.51566  
 H 0.02513 5.04785 -3.51055  
 C -1.25052 2.81149 2.48474  
 H -2.04989 2.17917 2.06319  
 C -0.32853 1.90529 3.33180  
 H 0.10830 1.09650 2.71907  
 H -0.88511 1.44236 4.16632  
 H 0.50663 2.48652 3.76316  
 C -1.91518 3.88954 3.36731  
 H -1.16886 4.53031 3.87013  
 H -2.52470 3.41609 4.15722  
 H -2.57426 4.54732 2.77585  
 C 3.54028 -0.55796 -0.03129  
 C 3.76799 1.79032 0.77042  
 H 2.71861 1.70229 0.43276  
 C 3.74609 2.05338 2.28410  
 H 3.27350 1.21462 2.81985  
 H 3.15107 2.96121 2.47599  
 H 4.75453 2.21532 2.70096  
 C 4.42383 2.92211 -0.03466  
 H 4.48510 2.66116 -1.10371  
 H 5.43395 3.17230 0.32902  
 H 3.79655 3.82320 0.05863  
 C 5.67379 0.04222 0.57171  
 C 6.80983 0.89421 1.05071  
 H 7.07675 1.68494 0.32815  
 H 7.70490 0.27000 1.19844  
 H 6.59181 1.38398 2.01404  
 C 5.70821 -1.27409 0.15820  
 C 6.86597 -2.22037 0.07463  
 H 7.04293 -2.57609 -0.95624  
 H 6.72676 -3.11013 0.71491  
 H 7.78736 -1.71895 0.40829  
 C 4.02484 -2.93044 -0.78940  
 H 4.88481 -3.58742 -0.57399  
 C 2.78880 -3.53630 -0.11448  
 H 2.92588 -3.61295 0.97585  
 H 2.61026 -4.54687 -0.51693  
 H 1.88183 -2.93616 -0.30356  
 C 3.87340 -2.80435 -2.31433  
 H 3.02273 -2.15227 -2.56694  
 H 3.69020 -3.79836 -2.75593  
 H 4.78566 -2.38578 -2.77220  
 C -0.09963 -0.67164 -2.71897

### III<sub>Ag</sub>

SCF (BP86) Energy = -2169.25428771  
 Enthalpy 0K = -2168.168520  
 Enthalpy 298K = -2168.167576  
 Free Energy 298K = -2168.337474  
 Lowest Frequency = 14.4938 cm<sup>-1</sup>  
 Second Frequency = 20.7326 cm<sup>-1</sup>  
 SCF (BP86-D3BJ) Energy = -2169.59157143  
 SCF (C6H6) Energy = -2169.26067834  
 SCF (BS2) Energy = -2981.40661968

Ag 1.38363 -0.32457 -0.77976  
 Si -3.60809 -1.15070 1.49698  
 Si -3.53464 2.25740 -0.60642  
 Al -1.32526 0.00400 -0.51770  
 N -2.12370 -1.34916 0.49113  
 N -1.82450 1.78488 -0.27646  
 N 4.08589 0.65699 0.58964  
 N 4.33632 -1.32443 -0.26057  
 O -1.35729 -0.43236 -2.33297  
 O 0.61867 -1.07363 -3.27455  
 C -1.52763 -2.66942 0.41923  
 C -1.82451 -3.56568 -0.66280  
 C -1.20664 -4.83329 -0.69083  
 H -1.43827 -5.51189 -1.51959  
 C -0.32660 -5.25423 0.31031  
 H 0.13004 -6.24923 0.26777  
 C -0.05495 -4.39039 1.37614  
 H 0.61830 -4.71730 2.17783  
 C -0.63531 -3.10929 1.45312  
 C -2.82717 -3.25202 -1.77928  
 H -3.14479 -2.20345 -1.65481  
 C -2.21861 -3.40540 -3.19258  
 H -1.31611 -2.79324 -3.33038  
 H -2.95588 -3.09532 -3.95394  
 H -1.95746 -4.45872 -3.40195  
 C -4.07991 -4.15601 -1.67719  
 H -3.81483 -5.21619 -1.84018  
 H -4.81921 -3.87612 -2.44862  
 H -4.56710 -4.08667 -0.69257  
 C -0.31440 -2.25345 2.68068  
 H -0.85532 -1.30017 2.56281  
 C 1.18906 -1.92049 2.79292  
 H 1.79878 -2.83467 2.91222  
 H 1.37843 -1.27772 3.67180  
 H 1.54884 -1.39005 1.89375  
 C -0.80334 -2.93231 3.98142  
 H -1.87504 -3.18782 3.93148  
 H -0.64692 -2.26997 4.85186  
 H -0.25152 -3.86971 4.17457  
 C -4.40425 -2.85047 1.83451  
 H -5.05707 -3.16928 1.00649  
 H -5.02914 -2.77804 2.74195  
 H -3.65451 -3.64088 1.99907  
 C -3.33961 -0.37085 3.22202  
 H -2.83885 -1.06824 3.91220  
 H -4.32989 -0.13296 3.65233  
 H -2.75583 0.56106 3.19661  
 C -4.91956 -0.07900 0.60351  
 H -5.03466 -0.44867 -0.43339  
 H -5.86582 -0.35769 1.11311  
 C -4.75652 1.46006 0.63078  
 H -4.50099 1.80605 1.65052  
 H -5.72977 1.94080 0.39679  
 C -4.06858 1.70965 -2.35380  
 H -3.51224 2.25474 -3.13361  
 H -5.14576 1.90476 -2.50251  
 H -3.89415 0.63398 -2.52373  
 C -3.73255 4.14244 -0.43383  
 H -3.58042 4.47135 0.60738  
 H -4.75586 4.42867 -0.73382

H -3.02220 4.70033 -1.06386  
 C -0.88129 2.86019 -0.08696  
 C -0.23239 3.48911 -1.20082  
 C 0.61436 4.59355 -0.97327  
 H 1.08767 5.08143 -1.83360  
 C 0.85563 5.08877 0.31326  
 H 1.50018 5.96248 0.46235  
 C 0.24557 4.45865 1.40471  
 H 0.42092 4.84174 2.41737  
 C -0.62013 3.36149 1.23018  
 C -0.42873 3.02436 -2.64571  
 H -1.06642 2.12557 -2.62131  
 C 0.91393 2.63272 -3.30469  
 H 1.57887 3.50801 -3.41989  
 H 0.74353 2.20391 -4.30715  
 H 1.44911 1.87682 -2.70395  
 C -1.14308 4.09094 -3.50811  
 H -2.13076 4.35856 -3.09751  
 H -1.29291 3.71738 -4.53655  
 H -0.54753 5.01932 -3.57382  
 C -1.26597 2.73422 2.46212  
 H -2.00572 2.01142 2.08012  
 C -0.22979 1.95194 3.29969  
 H 0.26950 1.17581 2.69417  
 H -0.71121 1.45454 4.16063  
 H 0.54968 2.62725 3.69625  
 C -2.00968 3.75922 3.34537  
 H -1.31723 4.48940 3.80123  
 H -2.53449 3.24616 4.17069  
 H -2.75787 4.32723 2.76738  
 C 3.41042 -0.33184 -0.07596  
 C 3.45107 1.97691 0.86207  
 H 2.39194 1.80866 0.59597  
 C 3.50821 2.37392 2.34392  
 H 3.16783 1.54956 2.99102  
 H 2.83066 3.22921 2.49698  
 H 4.51655 2.68384 2.66197  
 C 4.00531 3.05841 -0.07898  
 H 3.94659 2.72791 -1.12844  
 H 5.05258 3.31796 0.15076  
 H 3.39302 3.96803 0.02552  
 C 5.42113 0.29445 0.82369  
 C 6.43440 1.11919 1.55776  
 H 6.51016 2.14540 1.16256  
 H 7.42920 0.65785 1.45865  
 H 6.21186 1.19263 2.63654  
 C 5.57675 -0.96557 0.28108  
 C 6.78758 -1.84624 0.24555  
 H 7.09511 -2.09380 -0.78598  
 H 6.62917 -2.79713 0.78525  
 H 7.63670 -1.33720 0.72646  
 C 4.10486 -2.58849 -1.02095  
 H 5.03459 -3.16482 -0.88144  
 C 2.95061 -3.40624 -0.42873  
 H 3.10506 -3.60080 0.64439  
 H 2.88028 -4.37299 -0.95328  
 H 1.97965 -2.89604 -0.54728  
 C 3.93330 -2.30248 -2.52236  
 H 2.98993 -1.76945 -2.72946  
 H 3.90650 -3.25663 -3.07506  
 H 4.77360 -1.70250 -2.91063  
 C -0.06002 -0.64799 -2.33780

**TS (III-IV)<sub>ag</sub>**

SCF (BP86) Energy = -2169.23140354  
 Enthalpy 0K = -2168.147155  
 Enthalpy 298K = -2168.146211  
 Free Energy 298K = -2168.317124  
 Lowest Frequency = -127.9488 cm<sup>-1</sup>  
 Second Frequency = 9.3822 cm<sup>-1</sup>  
 SCF (BP86-D3BJ) Energy = -2169.55623532  
 SCF (C6H6) Energy = -2169.23919031

SCF (BS2) Energy = -2981.38306973

Ag 1.98376 -0.47388 -0.91759  
 Si -3.81318 -1.09998 1.66924  
 Si -3.76264 2.36439 -0.32040  
 Al -1.64585 0.01818 -0.50554  
 N -2.45653 -1.31466 0.50745  
 N -2.05522 1.80616 -0.19596  
 N 4.85990 -1.33291 -0.17382  
 N 4.47719 0.68939 0.52528  
 O -1.50808 -0.41117 -2.33189  
 O 0.66601 -0.96702 -2.66726  
 C -1.92790 -2.64902 0.29581  
 C -2.37335 -3.45869 -0.80078  
 C -1.79766 -4.73162 -0.98980  
 H -2.13895 -5.34362 -1.83248  
 C -0.81571 -5.23673 -0.13255  
 H -0.38892 -6.23164 -0.30076  
 C -0.40029 -4.45788 0.95255  
 H 0.35285 -4.85385 1.64467  
 C -0.93701 -3.17696 1.18696  
 C -3.48224 -3.03440 -1.76947  
 H -3.76482 -1.99866 -1.51206  
 C -3.02456 -3.05471 -3.24601  
 H -2.15595 -2.40051 -3.40737  
 H -3.84392 -2.70486 -3.89936  
 H -2.76323 -4.07843 -3.56945  
 C -4.73445 -3.93070 -1.61206  
 H -4.51325 -4.97176 -1.90876  
 H -5.55220 -3.56798 -2.26004  
 H -5.10211 -3.95588 -0.57419  
 C -0.46070 -2.41271 2.42368  
 H -0.97359 -1.43687 2.41970  
 C 1.05731 -2.13664 2.40293  
 H 1.64055 -3.07496 2.41106  
 H 1.35835 -1.54850 3.28882  
 H 1.35064 -1.56813 1.50085  
 C -0.84507 -3.15625 3.72417  
 H -1.92792 -3.35999 3.77212  
 H -0.56647 -2.56256 4.61354  
 H -0.32467 -4.12817 3.79628  
 C -4.65183 -2.77695 2.01180  
 H -5.37411 -3.04112 1.22281  
 H -5.20512 -2.71785 2.96540  
 H -3.92184 -3.59873 2.09058  
 C -3.30863 -0.40745 3.37925  
 H -2.76335 -1.15344 3.97927  
 H -4.22536 -0.13964 3.93609  
 H -2.68449 0.49695 3.31235  
 C -5.15391 0.07716 0.97603  
 H -5.41543 -0.24602 -0.04969  
 H -6.04893 -0.16020 1.58866  
 C -4.88546 1.60059 1.02691  
 H -4.49397 1.89431 2.01958  
 H -5.84399 2.15101 0.91938  
 C -4.50309 1.87014 -2.00825  
 H -4.03117 2.42464 -2.83547  
 H -5.58795 2.07696 -2.03234  
 H -4.36399 0.79487 -2.21535  
 C -3.84557 4.25141 -0.08845  
 H -3.60352 4.53594 0.94912  
 H -4.86928 4.60328 -0.30531  
 H -3.14988 4.79045 -0.75025  
 C -1.02565 2.81402 -0.11564  
 C -0.47199 3.41782 -1.29294  
 C 0.48828 4.44150 -1.15491  
 H 0.89252 4.91055 -2.05966  
 C 0.92193 4.88604 0.09925  
 H 1.64681 5.70423 0.17988  
 C 0.39375 4.28633 1.24930  
 H 0.71415 4.63696 2.23813  
 C -0.57044 3.26325 1.16711

|   |          |          |          |   |          |          |          |
|---|----------|----------|----------|---|----------|----------|----------|
| C | -0.89890 | 3.02272  | -2.70904 | O | -1.34702 | -0.45836 | -2.02539 |
| H | -1.58316 | 2.16326  | -2.62186 | O | 0.84820  | -0.86345 | -1.78966 |
| C | 0.30154  | 2.57666  | -3.57475 | C | -3.00310 | -2.45546 | -0.01603 |
| H | 1.00624  | 3.40965  | -3.75119 | C | -3.88024 | -2.79151 | -1.09484 |
| H | -0.04900 | 2.22248  | -4.55956 | C | -3.86481 | -4.10023 | -1.61401 |
| H | 0.85740  | 1.75017  | -3.10411 | H | -4.53742 | -4.34989 | -2.44311 |
| C | -1.65569 | 4.16959  | -3.42005 | C | -3.01343 | -5.08413 | -1.10025 |
| H | -2.55486 | 4.48060  | -2.86288 | H | -3.02063 | -6.09769 | -1.51591 |
| H | -1.97442 | 3.85268  | -4.42897 | C | -2.14784 | -4.75241 | -0.05296 |
| H | -1.01309 | 5.06075  | -3.53805 | H | -1.47175 | -5.51653 | 0.34960  |
| C | -1.11240 | 2.65915  | 2.46018  | C | -2.11986 | -3.45628 | 0.49846  |
| H | -1.94541 | 2.00041  | 2.16286  | C | -4.82426 | -1.76847 | -1.72811 |
| C | -0.04710 | 1.78516  | 3.15961  | H | -4.72205 | -0.83701 | -1.14339 |
| H | 0.32071  | 0.98830  | 2.49023  | C | -4.41989 | -1.46189 | -3.18906 |
| H | -0.46127 | 1.30516  | 4.06430  | H | -3.37158 | -1.12921 | -3.25039 |
| H | 0.82158  | 2.39323  | 3.47050  | H | -5.06775 | -0.67361 | -3.61386 |
| C | -1.66600 | 3.71908  | 3.43686  | H | -4.52837 | -2.35933 | -3.82466 |
| H | -0.87078 | 4.38683  | 3.81416  | C | -6.30409 | -2.20708 | -1.65767 |
| H | -2.12715 | 3.23088  | 4.31365  | H | -6.48016 | -3.13000 | -2.23862 |
| H | -2.43129 | 4.35247  | 2.95766  | H | -6.95982 | -1.42333 | -2.07718 |
| C | 3.88557  | -0.37211 | -0.10833 | H | -6.62633 | -2.40196 | -0.62070 |
| C | 4.71786  | -2.65470 | -0.85064 | C | -1.12979 | -3.16894 | 1.62874  |
| H | 5.67666  | -3.16491 | -0.66063 | H | -1.24290 | -2.10404 | 1.89494  |
| C | 3.60036  | -3.50069 | -0.22460 | C | 0.33249  | -3.38157 | 1.17458  |
| H | 3.73789  | -3.60035 | 0.86422  | H | 0.52124  | -4.43680 | 0.90583  |
| H | 3.61066  | -4.50793 | -0.67304 | H | 1.03148  | -3.11206 | 1.98768  |
| H | 2.60640  | -3.06027 | -0.40975 | H | 0.56426  | -2.76071 | 0.29302  |
| C | 4.55692  | -2.48066 | -2.37034 | C | -1.42577 | -4.01354 | 2.88889  |
| H | 5.37932  | -1.87878 | -2.79154 | H | -2.45125 | -3.84799 | 3.25970  |
| H | 3.60107  | -1.98673 | -2.61315 | H | -0.72320 | -3.76113 | 3.70384  |
| H | 4.56426  | -3.46979 | -2.85774 | H | -1.32013 | -5.09351 | 2.68112  |
| C | 6.05186  | -0.88077 | 0.40926  | C | -5.14663 | -2.36413 | 2.28083  |
| C | 7.29680  | -1.70743 | 0.50488  | H | -5.88747 | -2.49802 | 1.47565  |
| H | 7.14446  | -2.62586 | 1.09988  | H | -5.69562 | -2.24053 | 3.23082  |
| H | 8.09337  | -1.12995 | 0.99811  | H | -4.55676 | -3.29254 | 2.34275  |
| H | 7.67770  | -2.00995 | -0.48690 | C | -3.02894 | -0.51957 | 3.56132  |
| C | 5.81275  | 0.40449  | 0.85106  | H | -2.48171 | -1.42344 | 3.87585  |
| C | 6.74934  | 1.33057  | 1.56546  | H | -3.69478 | -0.22205 | 4.39137  |
| H | 6.47727  | 1.46647  | 2.62660  | H | -2.29146 | 0.28752  | 3.41904  |
| H | 6.78808  | 2.32940  | 1.10043  | C | -5.22789 | 0.65421  | 1.75266  |
| H | 7.77013  | 0.91891  | 1.53791  | H | -5.79996 | 0.50763  | 0.81665  |
| C | 3.76226  | 1.98552  | 0.68931  | H | -5.97259 | 0.53682  | 2.56782  |
| H | 2.72126  | 1.73164  | 0.41939  | C | -4.62291 | 2.07664  | 1.80707  |
| C | 3.76043  | 2.49134  | 2.13881  | H | -3.97066 | 2.18985  | 2.69439  |
| H | 3.47376  | 1.69115  | 2.84019  | H | -5.43525 | 2.82016  | 1.95135  |
| H | 3.01291  | 3.29692  | 2.21852  | C | -4.82423 | 2.49719  | -1.23690 |
| H | 4.73356  | 2.90522  | 2.44789  | H | -4.42532 | 3.01019  | -2.12708 |
| C | 4.26718  | 3.02896  | -0.31985 | H | -5.82825 | 2.90827  | -1.02836 |
| H | 5.29240  | 3.36876  | -0.09432 | H | -4.94859 | 1.43144  | -1.49496 |
| H | 3.59938  | 3.90494  | -0.28998 | C | -3.38441 | 4.58222  | 0.57280  |
| H | 4.24903  | 2.62042  | -1.34317 | H | -2.84499 | 4.75422  | 1.51937  |
| C | -0.25901 | -0.55596 | -1.90734 | H | -4.35430 | 5.10594  | 0.63520  |

#### IV<sub>Ag</sub>

SCF (BP86) Energy = -2169.24530840  
 Enthalpy 0K = -2168.160061  
 Enthalpy 298K = -2168.159116  
 Free Energy 298K = -2168.33474300  
 Lowest Frequency = 5.7237 cm<sup>-1</sup>  
 Second Frequency = 10.8992 cm<sup>-1</sup>  
 SCF (BP86-D3BJ) Energy = -2169.56081799  
 SCF (C6H6) Energy = -2169.25481690  
 SCF (BS2) Energy = -2981.39926312

|    |          |          |          |
|----|----------|----------|----------|
| Ag | 2.69005  | -0.73011 | -0.84938 |
| Si | -4.05016 | -0.83746 | 1.97828  |
| Si | -3.67972 | 2.72474  | 0.27282  |
| Al | -1.86716 | 0.08846  | -0.27382 |
| N  | -3.01198 | -1.11927 | 0.54356  |
| N  | -2.10001 | 1.90673  | 0.02087  |
| N  | 5.57313  | -1.58633 | -0.09850 |
| N  | 5.23341  | 0.51709  | 0.32972  |

|   |          |          |          |
|---|----------|----------|----------|
| O | -1.34702 | -0.45836 | -2.02539 |
| O | 0.84820  | -0.86345 | -1.78966 |
| C | -3.00310 | -2.45546 | -0.01603 |
| C | -3.88024 | -2.79151 | -1.09484 |
| C | -3.86481 | -4.10023 | -1.61401 |
| H | -4.53742 | -4.34989 | -2.44311 |
| C | -3.01343 | -5.08413 | -1.10025 |
| H | -3.02063 | -6.09769 | -1.51591 |
| C | -2.14784 | -4.75241 | -0.05296 |
| H | -1.47175 | -5.51653 | 0.34960  |
| C | -2.11986 | -3.45628 | 0.49846  |
| C | -4.82426 | -1.76847 | -1.72811 |
| H | -4.72205 | -0.83701 | -1.14339 |
| C | -4.41989 | -1.46189 | -3.18906 |
| H | -3.37158 | -1.12921 | -3.25039 |
| H | -5.06775 | -0.67361 | -3.61386 |
| H | -4.52837 | -2.35933 | -3.82466 |
| C | -6.30409 | -2.20708 | -1.65767 |
| H | -6.48016 | -3.13000 | -2.23862 |
| H | -6.95982 | -1.42333 | -2.07718 |
| H | -6.62633 | -2.40196 | -0.62070 |
| C | -1.12979 | -3.16894 | 1.62874  |
| H | -1.24290 | -2.10404 | 1.89494  |
| C | 0.33249  | -3.38157 | 1.17458  |
| H | 0.52124  | -4.43680 | 0.90583  |
| H | 1.03148  | -3.11206 | 1.98768  |
| H | 0.56426  | -2.76071 | 0.29302  |
| C | -1.42577 | -4.01354 | 2.88889  |
| H | -2.45125 | -3.84799 | 3.25970  |
| H | -0.72320 | -3.76113 | 3.70384  |
| H | -1.32013 | -5.09351 | 2.68112  |
| C | -5.14663 | -2.36413 | 2.28083  |
| H | -5.88747 | -2.49802 | 1.47565  |
| H | -5.69562 | -2.24053 | 3.23082  |
| H | -4.55676 | -3.29254 | 2.34275  |
| C | -3.02894 | -0.51957 | 3.56132  |
| H | -2.48171 | -1.42344 | 3.87585  |
| H | -3.69478 | -0.22205 | 4.39137  |
| H | -2.29146 | 0.28752  | 3.41904  |
| C | -5.22789 | 0.65421  | 1.75266  |
| H | -5.79996 | 0.50763  | 0.81665  |
| H | -5.97259 | 0.53682  | 2.56782  |
| C | -4.62291 | 2.07664  | 1.80707  |
| H | -3.97066 | 2.18985  | 2.69439  |
| H | -5.43525 | 2.82016  | 1.95135  |
| C | -4.82423 | 2.49719  | -1.23690 |
| H | -4.42532 | 3.01019  | -2.12708 |
| H | -5.82825 | 2.90827  | -1.02836 |
| H | -4.94859 | 1.43144  | -1.49496 |
| C | -3.38441 | 4.58222  | 0.57280  |
| H | -2.84499 | 4.75422  | 1.51937  |
| H | -4.35430 | 5.10594  | 0.63520  |
| H | -2.79440 | 5.04798  | -0.23245 |
| C | -0.93147 | 2.74468  | -0.10766 |
| C | -0.53234 | 3.28314  | -1.37326 |
| C | 0.58610  | 4.13984  | -1.43467 |
| H | 0.87621  | 4.56063  | -2.40460 |
| C | 1.31869  | 4.47984  | -0.29228 |
| H | 2.16019  | 5.17941  | -0.35946 |
| C | 0.94319  | 3.93406  | 0.94249  |
| H | 1.50238  | 4.20521  | 1.84609  |
| C | -0.16204 | 3.06986  | 1.05661  |
| C | -1.28426 | 2.98477  | -2.67239 |
| H | -2.06969 | 2.24887  | -2.43297 |
| C | -0.36589 | 2.35428  | -3.74382 |
| H | 0.43593  | 3.05095  | -4.04978 |
| H | -0.95092 | 2.10618  | -4.64679 |
| H | 0.09848  | 1.42525  | -3.37919 |
| C | -1.96738 | 4.25227  | -3.23749 |
| H | -2.66368 | 4.70513  | -2.51171 |
| H | -2.53809 | 4.00921  | -4.15154 |
| H | -1.22179 | 5.02233  | -3.50621 |

C -0.49950 2.46524 2.41844  
 H -1.52851 2.07412 2.33926  
 C 0.42917 1.26371 2.71492  
 H 0.37122 0.50835 1.91078  
 H 0.15909 0.77458 3.66812  
 H 1.48126 1.59513 2.78875  
 C -0.46626 3.48158 3.57801  
 H 0.55422 3.85726 3.77430  
 H -0.82142 3.00910 4.51069  
 H -1.10885 4.35413 3.37114  
 C 4.61428 -0.61144 -0.14003  
 C 5.36493 -3.00307 -0.51356  
 H 6.33976 -3.48871 -0.34201  
 C 4.32060 -3.69367 0.37695  
 H 4.59139 -3.61565 1.44270  
 H 4.25592 -4.76159 0.11066  
 H 3.32242 -3.24500 0.23927  
 C 5.03764 -3.10272 -2.01220  
 H 5.80518 -2.59971 -2.62314  
 H 4.05957 -2.64311 -2.23604  
 H 4.99317 -4.16320 -2.31065  
 C 6.78515 -1.07911 0.38859  
 C 8.02222 -1.90506 0.56031  
 H 7.87978 -2.72732 1.28431  
 H 8.84254 -1.27746 0.94014  
 H 8.36407 -2.35072 -0.39083  
 C 6.57301 0.25832 0.65819  
 C 7.54036 1.25944 1.21248  
 H 7.30869 1.53382 2.25624  
 H 7.56672 2.18903 0.62071  
 H 8.55721 0.83763 1.20166  
 C 4.52046 1.82574 0.38095  
 H 3.47289 1.54820 0.16507  
 C 4.55401 2.46454 1.77673  
 H 4.29028 1.73129 2.55626  
 H 3.80500 3.27205 1.80458  
 H 5.53279 2.90762 2.02051  
 C 4.99129 2.76859 -0.73717  
 H 6.01894 3.13536 -0.57517  
 H 4.31939 3.64152 -0.77227  
 H 4.94683 2.26527 -1.71652  
 C -0.26171 -0.49878 -1.26096

**Ag**

SCF (BP86) Energy = -2169.25485896  
 Enthalpy 0K = -2168.169510  
 Enthalpy 298K = -2168.168565  
 Free Energy 298K = -2168.345109  
 Lowest Frequency = 6.6710 cm<sup>-1</sup>  
 Second Frequency = 10.2469 cm<sup>-1</sup>  
 SCF (BP86-D3BJ) Energy = -2169.56675456  
 SCF (C6H6) Energy = -2169.26300048  
 SCF (BS2) Energy = -2981.40886137

Ag 2.75840 -0.61337 -0.87792  
 Si -4.17881 2.16753 -0.49526  
 Si -4.27600 -1.22067 1.61129  
 Al -1.79632 -0.00937 -0.14265  
 N -2.45612 1.71786 -0.26491  
 N -2.83542 -1.37000 0.55402  
 N 5.82168 -0.96012 -0.35406  
 N 4.98640 0.72074 0.74003  
 O 0.10782 -0.05428 0.22607  
 O 0.84995 -0.87555 -1.76477  
 C -1.46635 2.77116 -0.27568  
 C -1.03458 3.35392 0.95800  
 C -0.07332 4.38269 0.94094  
 H 0.24490 4.82952 1.89074  
 C 0.46902 4.85636 -0.25994  
 H 1.20049 5.67249 -0.25709  
 C 0.05159 4.28228 -1.46609  
 H 0.47186 4.64910 -2.41010

C -0.90242 3.24557 -1.50336  
 C -1.57551 2.87660 2.30579  
 H -2.38938 2.16436 2.08367  
 C -0.49088 2.11666 3.10400  
 H -0.07783 1.27934 2.51750  
 H -0.90419 1.71467 4.04661  
 H 0.34405 2.79212 3.36820  
 C -2.17016 4.02364 3.15153  
 H -1.39930 4.75981 3.44208  
 H -2.61372 3.62768 4.08234  
 H -2.95723 4.56757 2.60249  
 C -1.30628 2.68139 -2.86801  
 H -1.99568 1.84058 -2.68003  
 C -0.09856 2.12698 -3.65777  
 H 0.63916 2.91975 -3.87816  
 H -0.43483 1.71166 -4.62456  
 H 0.41099 1.32300 -3.10419  
 C -2.05392 3.73516 -3.71871  
 H -2.95012 4.12075 -3.20461  
 H -2.37393 3.30047 -4.68267  
 H -1.40324 4.59946 -3.94341  
 C -4.35340 4.06206 -0.41927  
 H -4.17633 4.43880 0.60205  
 H -5.37745 4.35155 -0.71317  
 H -3.64578 4.57657 -1.08839  
 C -4.85010 1.53715 -2.16782  
 H -4.39206 2.07124 -3.01621  
 H -5.94346 1.68497 -2.22512  
 H -4.65251 0.46016 -2.30554  
 C -5.31928 1.46490 0.87128  
 H -4.93636 1.79741 1.85517  
 H -6.27040 2.02067 0.73030  
 C -5.60558 -0.05550 0.87959  
 H -5.86510 -0.41174 -0.13566  
 H -6.50658 -0.25930 1.49571  
 C -3.82806 -0.54543 3.34123  
 H -3.23671 -1.27385 3.91972  
 H -4.74523 -0.32253 3.91557  
 H -3.24082 0.38637 3.27599  
 C -5.08828 -2.93061 1.80860  
 H -5.51161 -3.28609 0.85443  
 H -5.90979 -2.87146 2.54376  
 H -4.37121 -3.69183 2.15522  
 C -2.36792 -2.69995 0.21949  
 C -1.47929 -3.40771 1.08901  
 C -1.04977 -4.70078 0.72924  
 H -0.37318 -5.24130 1.40207  
 C -1.46169 -5.30706 -0.46208  
 H -1.11485 -6.31308 -0.72264  
 C -2.32120 -4.60912 -1.31744  
 H -2.64122 -5.07475 -2.25697  
 C -2.78780 -3.31939 -1.00054  
 C -0.96803 -2.81389 2.40348  
 H -1.37794 -1.79266 2.47922  
 C 0.57320 -2.69651 2.42239  
 H 1.05500 -3.68741 2.33898  
 H 0.91130 -2.24088 3.37100  
 H 0.92679 -2.06388 1.59210  
 C -1.45985 -3.62176 3.62649  
 H -2.56056 -3.68844 3.65863  
 H -1.11855 -3.15298 4.56718  
 H -1.06703 -4.65428 3.60838  
 C -3.70719 -2.60841 -1.99424  
 H -4.05274 -1.68258 -1.50096  
 C -2.93453 -2.20435 -3.27190  
 H -2.05670 -1.58281 -3.02819  
 H -3.58545 -1.63798 -3.96237  
 H -2.56985 -3.09780 -3.80995  
 C -4.95638 -3.44223 -2.35376  
 H -4.68761 -4.37137 -2.88718  
 H -5.62720 -2.86622 -3.01569  
 H -5.52752 -3.72942 -1.45451

|   |          |          |          |   |          |          |          |
|---|----------|----------|----------|---|----------|----------|----------|
| C | 4.65297  | -0.28917 | -0.12388 | H | -5.20120 | -3.39868 | -0.77530 |
| C | 5.94774  | -2.15420 | -1.23595 | C | -0.47736 | -2.57809 | 2.46764  |
| H | 7.01111  | -2.43922 | -1.17229 | H | -0.92478 | -1.57091 | 2.49352  |
| C | 5.10237  | -3.32433 | -0.70792 | C | 1.05491  | -2.39515 | 2.42740  |
| H | 5.35748  | -3.56080 | 0.33810  | H | 1.57685  | -3.36768 | 2.38221  |
| H | 5.28439  | -4.22066 | -1.32378 | H | 1.40694  | -1.86631 | 3.33187  |
| H | 4.02613  | -3.08538 | -0.75603 | H | 1.36179  | -1.80553 | 1.54370  |
| C | 5.62937  | -1.79830 | -2.69714 | C | -0.88691 | -3.32169 | 3.75999  |
| H | 6.25755  | -0.96425 | -3.05100 | H | -1.98013 | -3.44618 | 3.83471  |
| H | 4.57082  | -1.50637 | -2.80694 | H | -0.54368 | -2.76892 | 4.65307  |
| H | 5.81474  | -2.67363 | -3.34153 | H | -0.43709 | -4.32965 | 3.80198  |
| C | 6.88404  | -0.37874 | 0.35165  | C | -4.52095 | -2.77697 | 2.10287  |
| C | 8.28971  | -0.89266 | 0.30842  | H | -5.12388 | -3.13863 | 1.25487  |
| H | 8.37261  | -1.92100 | 0.70404  | H | -5.19009 | -2.68075 | 2.97604  |
| H | 8.94155  | -0.25504 | 0.92471  | H | -3.77022 | -3.55035 | 2.32934  |
| H | 8.70471  | -0.89291 | -0.71536 | C | -3.18925 | -0.35937 | 3.43222  |
| C | 6.35574  | 0.69173  | 1.04605  | H | -2.62198 | -1.08966 | 4.03103  |
| C | 7.05860  | 1.64017  | 1.96880  | H | -4.09231 | -0.08549 | 4.00751  |
| H | 6.78949  | 1.47327  | 3.02629  | H | -2.57282 | 0.54680  | 3.32781  |
| H | 6.83996  | 2.69404  | 1.73118  | C | -5.10008 | 0.05325  | 1.05969  |
| H | 8.14784  | 1.50500  | 1.88187  | H | -5.38068 | -0.29988 | 0.04916  |
| C | 3.96522  | 1.70821  | 1.19858  | H | -5.97583 | -0.18400 | 1.69940  |
| H | 3.02096  | 1.28609  | 0.80840  | C | -4.85897 | 1.58227  | 1.06630  |
| C | 3.84936  | 1.76739  | 2.72858  | H | -4.45715 | 1.90986  | 2.04406  |
| H | 3.76244  | 0.75653  | 3.15874  | H | -5.82942 | 2.11135  | 0.96038  |
| H | 2.93506  | 2.32448  | 2.98956  | C | -4.51641 | 1.76194  | -1.98460 |
| H | 4.70001  | 2.28473  | 3.20102  | H | -4.03785 | 2.27463  | -2.83467 |
| C | 4.16766  | 3.08218  | 0.54117  | H | -5.59947 | 1.97622  | -2.02072 |
| H | 5.05223  | 3.61282  | 0.93266  | H | -4.39152 | 0.67612  | -2.14378 |
| H | 3.28056  | 3.70688  | 0.73630  | C | -3.87728 | 4.21831  | -0.16082 |
| H | 4.27254  | 2.97944  | -0.55096 | H | -3.58148 | 4.55159  | 0.84767  |
| C | -0.10442 | -0.50546 | -1.01455 | H | -4.91739 | 4.54465  | -0.33511 |

**TS (III-S)<sub>Ag</sub>**

SCF (BP86) Energy = -2169.24812559  
 Enthalpy 0K = -2168.163568  
 Enthalpy 298K = -2168.162624  
 Free Energy 298K = -2168.333135  
 Lowest Frequency = -47.7498 cm<sup>-1</sup>  
 Second Frequency = 13.9928 cm<sup>-1</sup>  
 SCF (BP86-D3BJ) Energy = -2169.57399851  
 SCF (C6H6) Energy = -2169.25580125  
 SCF (BS2) Energy = -2981.40215584

|    |          |          |          |   |          |          |          |
|----|----------|----------|----------|---|----------|----------|----------|
| Ag | 1.85288  | -0.47263 | -0.76877 | H | -3.22885 | 4.73606  | -0.88489 |
| Si | -3.72476 | -1.08493 | 1.74950  | C | -1.03846 | 2.84267  | -0.17746 |
| Si | -3.77400 | 2.32714  | -0.32053 | C | -0.50094 | 3.39680  | -1.38305 |
| Al | -1.60258 | 0.03679  | -0.44542 | C | 0.42982  | 4.45261  | -1.29439 |
| N  | -2.36967 | -1.28995 | 0.56759  | H | 0.82540  | 4.88547  | -2.22044 |
| N  | -2.04999 | 1.80704  | -0.20454 | C | 0.85012  | 4.96669  | -0.06304 |
| N  | 4.45625  | 0.70583  | 0.61400  | H | 1.55516  | 5.80475  | -0.02231 |
| N  | 4.83205  | -1.27398 | -0.18974 | C | 0.34233  | 4.40670  | 1.11583  |
| O  | -1.01305 | -0.45939 | -2.04178 | H | 0.66117  | 4.80702  | 2.08560  |
| O  | 0.67774  | -1.47915 | -3.09099 | C | -0.59624 | 3.35763  | 1.08359  |
| C  | -1.91940 | -2.64821 | 0.30779  | C | -0.90070 | 2.90687  | -2.77649 |
| C  | -2.38357 | -3.37028 | -0.83778 | H | -1.55575 | 2.02999  | -2.64650 |
| C  | -1.92837 | -4.68865 | -1.03977 | C | 0.32617  | 2.44599  | -3.59482 |
| H  | -2.28441 | -5.24036 | -1.91691 | H | 1.00083  | 3.29030  | -3.82613 |
| C  | -1.03997 | -5.30844 | -0.15591 | H | 0.00334  | 2.00299  | -4.55260 |
| H  | -0.70506 | -6.33585 | -0.33535 | H | 0.90466  | 1.68244  | -3.05022 |
| C  | -0.58726 | -4.59851 | 0.96093  | C | -1.68634 | 3.98457  | -3.55967 |
| H  | 0.10721  | -5.07850 | 1.66077  | H | -2.60067 | 4.29869  | -3.02853 |
| C  | -1.00796 | -3.27839 | 1.21359  | H | -1.98418 | 3.59975  | -4.55113 |
| C  | -3.36922 | -2.79386 | -1.85934 | H | -1.07165 | 4.88789  | -3.72403 |
| H  | -3.52016 | -1.72804 | -1.60928 | C | -1.11401 | 2.78861  | 2.40318  |
| C  | -2.83060 | -2.86917 | -3.30621 | H | -1.96961 | 2.14180  | 2.14606  |
| H  | -1.84913 | -2.38028 | -3.39762 | C | -0.04408 | 1.90139  | 3.07932  |
| H  | -3.53442 | -2.36880 | -3.99535 | H | 0.28389  | 1.08674  | 2.40966  |
| H  | -2.73470 | -3.91678 | -3.64387 | H | -0.43415 | 1.44452  | 4.00641  |
| C  | -4.74747 | -3.49159 | -1.77559 | H | 0.84718  | 2.49628  | 3.34745  |
| H  | -4.65804 | -4.56926 | -2.00083 | C | -1.61522 | 3.87272  | 3.38109  |
| H  | -5.44703 | -3.05379 | -2.50976 | H | -0.79506 | 4.52325  | 3.73366  |
|    |          |          |          | H | -2.06657 | 3.40483  | 4.27374  |
|    |          |          |          | H | -2.37592 | 4.52100  | 2.91430  |
|    |          |          |          | C | 3.84066  | -0.34388 | -0.01638 |
|    |          |          |          | C | 3.72925  | 1.98213  | 0.85601  |
|    |          |          |          | H | 2.68110  | 1.71832  | 0.62669  |
|    |          |          |          | C | 3.79491  | 2.44190  | 2.31939  |
|    |          |          |          | H | 3.53063  | 1.62275  | 3.00769  |
|    |          |          |          | H | 3.06499  | 3.25559  | 2.46025  |
|    |          |          |          | H | 4.78599  | 2.83419  | 2.59836  |
|    |          |          |          | C | 4.16772  | 3.06583  | -0.14205 |
|    |          |          |          | H | 4.11001  | 2.68616  | -1.17483 |
|    |          |          |          | H | 5.19556  | 3.41980  | 0.04683  |

H 3.48566 3.92728 -0.05860  
 C 5.81825 0.44477 0.83349  
 C 6.78234 1.36249 1.52196  
 H 6.77341 2.37944 1.09608  
 H 7.80668 0.97346 1.41317  
 H 6.57789 1.45185 2.60329  
 C 6.05322 -0.81591 0.32283  
 C 7.32114 -1.61239 0.29331  
 H 7.63372 -1.86514 -0.73557  
 H 7.23467 -2.55797 0.85830  
 H 8.13888 -1.03459 0.75052  
 C 4.67189 -2.57158 -0.90947  
 H 5.64967 -3.06930 -0.79824  
 C 3.60858 -3.46082 -0.25031  
 H 3.81289 -3.59986 0.82384  
 H 3.60658 -4.44936 -0.73882  
 H 2.59995 -3.02847 -0.36250  
 C 4.41106 -2.34557 -2.40860  
 H 3.41555 -1.90213 -2.58259  
 H 4.44295 -3.31395 -2.93565  
 H 5.17624 -1.68539 -2.85027  
 C 0.28797 -0.86315 -2.09612

**S<sub>Ag</sub>**

SCF (BP86) Energy = -2169.29660773  
 Enthalpy 0K = -2168.210819  
 Enthalpy 298K = -2168.209875  
 Free Energy 298K = -2168.385725  
 Lowest Frequency = 4.5068 cm<sup>-1</sup>  
 Second Frequency = 8.9182 cm<sup>-1</sup>  
 SCF (BP86-D3BJ) Energy = -2169.60586205  
 SCF (C6H6) Energy = -2169.30484550  
 SCF (BS2) Energy = -2981.45001543

Ag 2.62057 -0.10366 -0.03670  
 Si -4.36431 -1.54402 1.14662  
 Si -4.27412 1.78854 -1.04020  
 Al -1.76312 0.02353 0.01179  
 N -2.71866 -1.49941 0.43210  
 N -2.61129 1.61439 -0.38792  
 N 5.55556 0.65469 0.66613  
 N 5.55858 -0.96354 -0.77944  
 O -0.15829 0.31019 1.03426  
 O -0.20226 -0.37255 -1.04427  
 C -2.01678 -2.75299 0.25004  
 C -2.07563 -3.42744 -1.01121  
 C -1.39813 -4.65049 -1.17499  
 H -1.44857 -5.15983 -2.14478  
 C -0.66874 -5.22926 -0.13061  
 H -0.15712 -6.18763 -0.27347  
 C -0.60317 -4.56590 1.09910  
 H -0.03085 -5.01217 1.92118  
 C -1.25572 -3.33494 1.31379  
 C -2.83500 -2.85051 -2.20645  
 H -3.34359 -1.93807 -1.84846  
 C -1.86661 -2.44045 -3.34075  
 H -1.10181 -1.73599 -2.97598  
 H -2.41820 -1.96362 -4.17121  
 H -1.34459 -3.32381 -3.75158  
 C -3.91802 -3.81398 -2.74043  
 H -3.47335 -4.74441 -3.13664  
 H -4.48381 -3.34222 -3.56349  
 H -4.63549 -4.09924 -1.95252  
 C -1.12273 -2.67882 2.69071  
 H -1.62429 -1.69805 2.63463  
 C 0.35251 -2.42513 3.07609  
 H 0.91664 -3.37100 3.16656  
 H 0.40922 -1.91015 4.05189  
 H 0.85337 -1.79085 2.32781  
 C -1.81850 -3.51492 3.79025  
 H -2.88687 -3.67702 3.57024  
 H -1.74486 -3.00939 4.77005

H -1.34740 -4.50918 3.89226  
 C -4.96490 -3.34804 1.24503  
 H -5.15536 -3.76261 0.24114  
 H -5.90962 -3.39350 1.81456  
 H -4.23338 -4.00615 1.74010  
 C -4.39732 -0.78085 2.89692  
 H -3.84343 -1.40112 3.62027  
 H -5.43807 -0.68948 3.25642  
 H -3.95084 0.22808 2.91173  
 C -5.64954 -0.59708 0.09126  
 H -5.62606 -1.00554 -0.93720  
 H -6.62593 -0.92283 0.50818  
 C -5.58875 0.94881 0.06818  
 H -5.49217 1.35331 1.09393  
 H -6.55193 1.35125 -0.31065  
 C -4.43434 1.02653 -2.78409  
 H -3.86592 1.60317 -3.53192  
 H -5.49268 1.01202 -3.10104  
 H -4.06441 -0.01257 -2.81233  
 C -4.73292 3.63406 -1.12764  
 H -5.69232 3.75177 -1.66113  
 H -3.97117 4.22981 -1.65499  
 H -4.85080 4.06662 -0.12028  
 C -1.80866 2.81029 -0.23578  
 C -1.04885 3.33360 -1.33050  
 C -0.29772 4.51210 -1.14568  
 H 0.27312 4.91442 -1.99119  
 C -0.26458 5.17864 0.08363  
 H 0.32185 6.09655 0.20294  
 C -0.99238 4.65555 1.15804  
 H -0.96610 5.16728 2.12758  
 C -1.76499 3.48626 1.02532  
 C -1.01890 2.66818 -2.70890  
 H -1.59511 1.73086 -2.63123  
 C 0.41682 2.29605 -3.14409  
 H 1.05107 3.19352 -3.25956  
 H 0.39794 1.77501 -4.11815  
 H 0.89048 1.62674 -2.40879  
 C -1.68381 3.55577 -3.78681  
 H -2.72698 3.80437 -3.52961  
 H -1.68663 3.04399 -4.76612  
 H -1.13779 4.50835 -3.91066  
 C -2.51682 2.96882 2.25215  
 H -3.09208 2.08594 1.92192  
 C -1.53910 2.51233 3.36018  
 H -0.83057 1.75942 2.97926  
 H -2.09210 2.07743 4.21242  
 H -0.95296 3.36650 3.74550  
 C -3.52062 4.00315 2.80840  
 H -3.00641 4.91032 3.17335  
 H -4.08383 3.57809 3.65828  
 H -4.24760 4.32053 2.04187  
 C 4.72163 -0.15681 -0.05931  
 C 5.00500 1.71679 1.55465  
 H 3.91818 1.51517 1.52854  
 C 5.47437 1.57020 3.01009  
 H 5.33378 0.53763 3.36879  
 H 4.87024 2.23626 3.64786  
 H 6.53055 1.85282 3.14686  
 C 5.23279 3.12020 0.97068  
 H 4.85591 3.17757 -0.06310  
 H 6.29634 3.41181 0.97469  
 H 4.68270 3.85931 1.57618  
 C 6.90383 0.36617 0.40185  
 C 8.08044 1.04470 1.03484  
 H 8.01792 2.14340 0.97076  
 H 9.00506 0.74129 0.51987  
 H 8.19591 0.77836 2.10003  
 C 6.90201 -0.66541 -0.51664  
 C 8.05242 -1.38448 -1.15035  
 H 8.04132 -1.30246 -2.25184  
 H 8.06650 -2.45919 -0.89456



H 9.00347 -0.95517 -0.80035  
C 5.09882 -2.02616 -1.71855  
H 6.02691 -2.47590 -2.10904  
C 4.30773 -3.11510 -0.97660  
H 4.89030 -3.53135 -0.13824  
H 4.06259 -3.93394 -1.67296  
H 3.36134 -2.71169 -0.57718  
C 4.31948 -1.42157 -2.89745  
H 3.37391 -0.96909 -2.55223  
H 4.07450 -2.21350 -3.62445  
H 4.91028 -0.64545 -3.41142  
C 0.54849 -0.05220 -0.01333

### III<sub>Ag,N</sub>

SCF (BP86) Energy = -2365.31044474  
Enthalpy 0K = -2364.028007  
Enthalpy 298K = -2364.027063  
Free Energy 298K = -2364.211086  
Lowest Frequency = 18.4764 cm<sup>-1</sup>  
Second Frequency = 25.2979 cm<sup>-1</sup>  
SCF (BP86-D3BJ) Energy = -2365.71064649  
SCF (C6H6) Energy = -2365.31440605  
SCF (BS2) Energy = -3177.49682734

Ag -1.39893 -0.15982 0.58450  
Si 3.39348 -1.40848 -1.82688  
Si 3.77019 2.03198 0.29247  
Al 1.32365 -0.18385 0.32744  
N 1.78063 -1.45225 -1.02352  
N 2.03351 1.58168 0.10936  
N -3.89471 1.33170 -0.69959  
N -4.36318 -0.75302 -0.32330  
N 1.30384 -0.78988 2.15375  
N -1.04859 -0.98501 2.95628  
C 0.94648 -2.57308 -1.42581  
C 0.96222 -3.81555 -0.70078  
C 0.19497 -4.90904 -1.14883  
H 0.22886 -5.84404 -0.57767  
C -0.58691 -4.84016 -2.30374  
H -1.16239 -5.70735 -2.64586  
C -0.61101 -3.63883 -3.01423  
H -1.21920 -3.56774 -3.92359  
C 0.12807 -2.50900 -2.60538  
C 1.77893 -4.03193 0.57038  
H 2.38925 -3.12476 0.71054  
C 0.84820 -4.19231 1.79325  
H 0.17070 -3.33200 1.90128  
H 1.43665 -4.29499 2.72364  
H 0.22979 -5.10285 1.69410  
C 2.71985 -5.25709 0.49117  
H 2.14880 -6.20251 0.47045  
H 3.37307 -5.29533 1.38174  
H 3.36010 -5.23663 -0.40364  
C -0.01350 -1.26140 -3.47895  
H 0.67976 -0.49908 -3.08648  
C -1.45170 -0.69992 -3.39839  
H -2.18787 -1.46631 -3.70222  
H -1.57556 0.16319 -4.07547  
H -1.69941 -0.38099 -2.37197  
C 0.33767 -1.54150 -4.95969  
H 1.30139 -2.06450 -5.06822  
H 0.39112 -0.59780 -5.53107  
H -0.43146 -2.17106 -5.44198  
C 4.06316 -3.17167 -2.11631  
H 4.45170 -3.61409 -1.18503  
H 4.89933 -3.11901 -2.83607  
H 3.30140 -3.85121 -2.53051  
C 3.47146 -0.57952 -3.54803  
H 3.00950 -1.20974 -4.32331  
H 4.53587 -0.45355 -3.81937  
H 2.99743 0.41266 -3.58859  
C 4.72351 -0.52849 -0.75929

H 4.63526 -0.84651 0.29794  
H 5.65597 -1.01609 -1.11222  
C 4.86863 1.00812 -0.88319  
H 4.69687 1.33102 -1.92627  
H 5.90915 1.31116 -0.64609  
C 4.52351 1.77041 2.03184  
H 3.95432 2.30054 2.81186  
H 5.54421 2.19505 2.02153  
H 4.61500 0.71584 2.33100  
C 4.04816 3.89519 -0.01543  
H 3.60831 4.27740 -0.94695  
H 5.13682 4.08194 -0.04367  
H 3.62967 4.49268 0.81151  
C 1.19942 2.75034 -0.07515  
C 0.67103 3.47020 1.04825  
C 0.00605 4.69662 0.84382  
H -0.36628 5.24731 1.71612  
C -0.15642 5.24411 -0.43304  
H -0.64241 6.21704 -0.56697  
C 0.32214 4.52719 -1.53570  
H 0.20054 4.94526 -2.54232  
C 0.97751 3.28816 -1.38851  
C 0.84025 2.98855 2.48943  
H 1.37973 2.02762 2.44959  
C -0.52399 2.74142 3.17112  
H -1.12130 3.66965 3.22608  
H -0.37780 2.38214 4.20569  
H -1.11218 1.98043 2.63124  
C 1.67172 3.98019 3.33643  
H 2.65328 4.19061 2.88069  
H 1.84531 3.57423 4.34911  
H 1.14850 4.94635 3.45300  
C 1.43827 2.57029 -2.65802  
H 1.77699 1.56804 -2.34372  
C 0.27639 2.39892 -3.65990  
H -0.60034 1.93781 -3.18077  
H 0.58586 1.75693 -4.50355  
H -0.04010 3.36796 -4.08608  
C 2.61254 3.27954 -3.37249  
H 2.34731 4.32134 -3.62858  
H 2.86083 2.75920 -4.31497  
H 3.52415 3.30591 -2.75636  
C -3.34070 0.15859 -0.25398  
C -3.12601 2.60685 -0.69859  
H -2.08640 2.28000 -0.51591  
C -3.16588 3.32596 -2.05529  
H -2.97379 2.62513 -2.88376  
H -2.36965 4.08671 -2.06344  
H -4.12453 3.83734 -2.23711  
C -3.55315 3.50572 0.47295  
H -3.49326 2.95703 1.42660  
H -4.58077 3.88913 0.35149  
H -2.86794 4.36651 0.52912  
C -5.24705 1.16534 -1.03616  
C -6.15499 2.23021 -1.57296  
H -6.12917 3.15016 -0.96617  
H -7.19419 1.86594 -1.56767  
H -5.90896 2.50922 -2.61219  
C -5.54075 -0.16089 -0.79624  
C -6.82752 -0.90262 -0.98928  
H -7.19331 -1.35928 -0.05248  
H -6.73823 -1.70739 -1.74120  
H -7.60854 -0.21289 -1.34405  
C -4.30024 -2.16954 0.14021  
H -5.23845 -2.61919 -0.22598  
C -3.13803 -2.93650 -0.49863  
H -3.16642 -2.87371 -1.59704  
H -3.20183 -3.99849 -0.21061  
H -2.15654 -2.55912 -0.16442  
C -4.29652 -2.23096 1.67616  
H -3.36966 -1.79133 2.08515  
H -4.35583 -3.28318 2.00276

H -5.16159 -1.69014 2.09693  
 C -0.06068 -0.74149 2.15104  
 C -1.07837 -1.32425 4.39187  
 H -0.11450 -1.09173 4.88544  
 C 2.04930 -1.20468 3.37066  
 H 1.44998 -1.99219 3.86807  
 C -1.36678 -2.82446 4.59201  
 H -2.31561 -3.10010 4.10022  
 H -0.56799 -3.44967 4.16186  
 H -1.45252 -3.06267 5.66726  
 C -2.16805 -0.46986 5.06672  
 H -3.15247 -0.68053 4.61359  
 H -2.22661 -0.68957 6.14747  
 H -1.95934 0.60460 4.93865  
 C 2.22757 -0.03850 4.36506  
 H 1.26642 0.45323 4.58602  
 H 2.65322 -0.40474 5.31673  
 H 2.91059 0.72252 3.95740  
 C 3.40750 -1.82745 3.01785  
 H 3.97685 -2.04204 3.93860  
 H 3.29436 -2.76802 2.45963  
 H 4.01309 -1.13995 2.40490

**TS (III-IV)<sub>ag,N</sub>**

SCF (BP86) Energy = -2365.30228943  
 Enthalpy 0K = -2364.021233  
 Enthalpy 298K = -2364.020289  
 Free Energy 298K = -2364.204566  
 Lowest Frequency = -103.4212 cm<sup>-1</sup>  
 Second Frequency = 17.1636 cm<sup>-1</sup>  
 SCF (BP86-D3BJ) Energy = -2365.69718986  
 SCF (C6H6) Energy = -2365.30632513  
 SCF (BS2) Energy = -3177.48884309

Ag 1.68936 0.17875 0.83397  
 Si -3.35223 1.48165 -1.95354  
 Si -3.87653 -2.01199 0.04273  
 Al -1.49412 0.19216 0.31403  
 N -1.79215 1.48147 -1.05092  
 N -2.13080 -1.57363 -0.03494  
 N 4.03169 -1.32096 -0.56844  
 N 4.55644 0.75632 -0.20878  
 N -1.67502 0.72698 2.15543  
 N 0.74713 0.76391 2.77046  
 C -0.92970 2.61202 -1.34847  
 C -0.99873 3.82919 -0.58538  
 C -0.19846 4.93351 -0.93953  
 H -0.27243 5.84948 -0.34199  
 C 0.66722 4.89945 -2.03486  
 H 1.26730 5.77552 -2.30437  
 C 0.74194 3.72252 -2.78191  
 H 1.41440 3.67921 -3.64671  
 C -0.02786 2.58351 -2.46644  
 C -1.90085 4.00539 0.63425  
 H -2.52393 3.09799 0.70674  
 C -1.04602 4.11477 1.91600  
 H -0.38444 3.24308 2.02859  
 H -1.68652 4.19080 2.81375  
 H -0.41319 5.02023 1.88543  
 C -2.82762 5.23997 0.53862  
 H -2.25115 6.18100 0.58835  
 H -3.53636 5.25168 1.38637  
 H -3.40937 5.25650 -0.39543  
 C 0.16955 1.36428 -3.36850  
 H -0.55196 0.59384 -3.04926  
 C 1.59695 0.79302 -3.20837  
 H 2.35395 1.56228 -3.44696  
 H 1.76150 -0.05428 -3.89665  
 H 1.78010 0.44999 -2.17594  
 C -0.08074 1.69405 -4.85933  
 H -1.03792 2.21715 -5.01539  
 H -0.08981 0.77047 -5.46504

H 0.71591 2.34267 -5.26588  
 C -3.98835 3.25817 -2.23457  
 H -4.43482 3.67726 -1.31870  
 H -4.77513 3.23372 -3.00938  
 H -3.19587 3.94245 -2.57725  
 C -3.32734 0.70265 -3.69897  
 H -2.80406 1.34737 -4.42182  
 H -4.37250 0.60277 -4.04551  
 H -2.86638 -0.29572 -3.73696  
 C -4.74523 0.58454 -0.98407  
 H -4.70504 0.86755 0.08656  
 H -5.65425 1.09409 -1.36575  
 C -4.89893 -0.94636 -1.16466  
 H -4.67073 -1.23941 -2.20577  
 H -5.95412 -1.24424 -0.99604  
 C -4.69418 -1.74864 1.74960  
 H -4.18670 -2.32201 2.54148  
 H -5.73988 -2.10255 1.69700  
 H -4.71968 -0.69232 2.05624  
 C -4.15681 -3.86301 -0.32345  
 H -3.69202 -4.21814 -1.25397  
 H -5.24493 -4.04253 -0.38936  
 H -3.76463 -4.48832 0.49542  
 C -1.28480 -2.73486 -0.20155  
 C -0.82903 -3.49083 0.93014  
 C -0.13478 -4.70176 0.73007  
 H 0.18466 -5.27858 1.60637  
 C 0.11935 -5.20380 -0.55036  
 H 0.62648 -6.16598 -0.68354  
 C -0.29767 -4.45691 -1.65800  
 H -0.10666 -4.84053 -2.66748  
 C -0.97458 -3.22928 -1.51380  
 C -1.10677 -3.06675 2.37260  
 H -1.64216 -2.10326 2.33325  
 C 0.20326 -2.85315 3.16220  
 H 0.78592 -3.78909 3.23883  
 H -0.01823 -2.51907 4.19197  
 H 0.83714 -2.08642 2.68683  
 C -1.99800 -4.09019 3.11496  
 H -2.94767 -4.27306 2.58573  
 H -2.23809 -3.72944 4.13121  
 H -1.48695 -5.06396 3.22174  
 C -1.36227 -2.47451 -2.78563  
 H -1.71857 -1.48155 -2.46107  
 C -0.14659 -2.27636 -3.71628  
 H 0.70569 -1.84010 -3.17362  
 H -0.40585 -1.60240 -4.55185  
 H 0.18709 -3.23189 -4.15956  
 C -2.49514 -3.16200 -3.58340  
 H -2.21541 -4.19663 -3.85274  
 H -2.69159 -2.61572 -4.52348  
 H -3.43933 -3.20451 -3.01919  
 C 3.51888 -0.13615 -0.09999  
 C 3.22441 -2.57082 -0.56276  
 H 2.19680 -2.20596 -0.38257  
 C 3.23744 -3.29640 -1.91650  
 H 3.07861 -2.59098 -2.74817  
 H 2.40822 -4.02114 -1.92495  
 H 4.17310 -3.85038 -2.09331  
 C 3.61595 -3.48095 0.61242  
 H 3.57131 -2.92769 1.56445  
 H 4.63109 -3.89803 0.49511  
 H 2.90307 -4.31961 0.66770  
 C 5.37589 -1.18084 -0.95090  
 C 6.24432 -2.26873 -1.50619  
 H 6.21103 -3.18464 -0.89317  
 H 7.29190 -1.92980 -1.52796  
 H 5.96643 -2.54757 -2.53741  
 C 5.70442 0.13873 -0.72515  
 C 6.99575 0.85630 -0.97050  
 H 7.40792 1.30867 -0.05079  
 H 6.89178 1.66089 -1.72099

|   |          |          |          |   |          |          |          |
|---|----------|----------|----------|---|----------|----------|----------|
| H | 7.74911  | 0.15152  | -1.35434 | H | 4.47314  | -4.95631 | -0.90502 |
| C | 4.53475  | 2.17133  | 0.25701  | C | 0.23715  | -1.02596 | -3.01695 |
| H | 5.46738  | 2.60687  | -0.13932 | H | 0.98886  | -0.27451 | -2.72218 |
| C | 3.36248  | 2.96107  | -0.33620 | C | -1.13075 | -0.58659 | -2.44869 |
| H | 3.34687  | 2.89760  | -1.43478 | H | -1.90757 | -1.33961 | -2.67257 |
| H | 3.45625  | 4.02182  | -0.05091 | H | -1.45986 | 0.37452  | -2.88365 |
| H | 2.38987  | 2.59781  | 0.03624  | H | -1.08946 | -0.47228 | -1.34950 |
| C | 4.58528  | 2.23293  | 1.79276  | C | 0.17589  | -1.07302 | -4.55966 |
| H | 3.66904  | 1.79597  | 2.22413  | H | 1.11768  | -1.44438 | -4.99590 |
| H | 4.65976  | 3.28290  | 2.12240  | H | -0.01668 | -0.06560 | -4.96789 |
| H | 5.45620  | 1.68212  | 2.18665  | H | -0.63651 | -1.73075 | -4.91727 |
| C | -0.32551 | 0.61140  | 2.01511  | C | 4.79759  | -2.68124 | -2.37853 |
| C | 0.85620  | 1.03692  | 4.21890  | H | 5.33041  | -3.09268 | -1.50625 |
| H | -0.07749 | 0.75250  | 4.74210  | H | 5.54382  | -2.50118 | -3.17267 |
| C | -2.36390 | 1.13483  | 3.40706  | H | 4.09136  | -3.44339 | -2.74477 |
| H | -1.70978 | 1.86679  | 3.92047  | C | 3.67437  | -0.20846 | -3.66961 |
| C | 1.12935  | 2.52827  | 4.49435  | H | 3.12947  | -0.88435 | -4.34915 |
| H | 2.02931  | 2.85724  | 3.94575  | H | 4.66291  | -0.01308 | -4.12386 |
| H | 0.28842  | 3.16327  | 4.17415  | H | 3.12788  | 0.74593  | -3.63027 |
| H | 1.29994  | 2.70000  | 5.57223  | C | 5.26191  | -0.01961 | -1.01759 |
| C | 1.99760  | 0.17446  | 4.78843  | H | 5.38441  | -0.45324 | -0.00558 |
| H | 2.94880  | 0.42543  | 4.28632  | H | 6.19019  | -0.30808 | -1.55377 |
| H | 2.11978  | 0.34980  | 5.87183  | C | 5.16509  | 1.52410  | -0.95883 |
| H | 1.80219  | -0.89728 | 4.62668  | H | 4.84986  | 1.93023  | -1.93761 |
| C | -2.59262 | -0.05639 | 4.35962  | H | 6.16999  | 1.95562  | -0.76894 |
| H | -1.65439 | -0.59871 | 4.56111  | C | 4.82541  | 1.65603  | 2.06197  |
| H | -2.99917 | 0.29611  | 5.32461  | H | 4.17541  | 1.87505  | 2.92464  |
| H | -3.31051 | -0.77095 | 3.92755  | H | 5.78356  | 2.18487  | 2.21448  |
| C | -3.69178 | 1.84275  | 3.09830  | H | 5.04420  | 0.57660  | 2.06368  |
| H | -4.19973 | 2.12525  | 4.03666  | C | 4.18207  | 4.13523  | 0.42629  |
| H | -3.53682 | 2.75509  | 2.50346  | H | 3.64617  | 4.62510  | -0.39964 |
| H | -4.37326 | 1.18251  | 2.53619  | H | 5.24930  | 4.41233  | 0.35988  |

#### IV<sub>Ag,N</sub>

SCF (BP86) Energy = -2365.32414109  
 Enthalpy 0K = -2364.041977  
 Enthalpy 298K = -2364.041033  
 Free Energy 298K = -2364.227648  
 Lowest Frequency = 13.8757 cm<sup>-1</sup>  
 Second Frequency = 19.7187 cm<sup>-1</sup>  
 SCF (BP86-D3BJ) Energy = -2365.70845507  
 SCF (C6H6) Energy = -2365.32957014  
 SCF (BS2) Energy = -3177.51220290

|    |          |          |          |   |          |          |          |
|----|----------|----------|----------|---|----------|----------|----------|
| Ag | -2.48448 | -0.56941 | 0.87695  | C | -0.38267 | 2.40005  | 3.34333  |
| Si | 3.93527  | -1.03068 | -1.96218 | H | -1.02061 | 3.29203  | 3.48045  |
| Si | 4.04406  | 2.23216  | 0.41665  | H | -0.20962 | 1.96765  | 4.34487  |
| Al | 1.82776  | -0.13299 | 0.37385  | H | -0.93882 | 1.66110  | 2.74356  |
| N  | 2.44157  | -1.28870 | -0.99967 | C | 1.75853  | 3.72500  | 3.58450  |
| N  | 2.34170  | 1.69442  | 0.22122  | H | 2.74937  | 3.96245  | 3.16388  |
| N  | -4.50470 | 1.24851  | -0.59242 | H | 1.91244  | 3.27957  | 4.58404  |
| N  | -5.31425 | -0.76158 | -0.46770 | H | 1.21903  | 4.67910  | 3.72496  |
| N  | 1.66720  | -0.87040 | 2.15772  | C | 1.73844  | 2.88428  | -2.46316 |
| N  | -0.81466 | -1.09024 | 2.03458  | H | 2.22314  | 1.92378  | -2.21863 |
| C  | 1.66969  | -2.45560 | -1.38497 | C | 0.64919  | 2.62581  | -3.52741 |
| C  | 1.91986  | -3.74974 | -0.81346 | H | -0.15739 | 1.98862  | -3.13295 |
| C  | 1.19114  | -4.86861 | -1.26490 | H | 1.08351  | 2.12577  | -4.41122 |
| H  | 1.40074  | -5.84809 | -0.81953 | H | 0.19270  | 3.56925  | -3.87747 |
| C  | 0.21339  | -4.76592 | -2.25720 | C | 2.80660  | 3.82858  | -3.06284 |
| H  | -0.33305 | -5.65186 | -2.59906 | H | 2.37421  | 4.82033  | -3.28828 |
| C  | -0.05312 | -3.50702 | -2.80081 | H | 3.20003  | 3.41439  | -4.00867 |
| H  | -0.82540 | -3.40828 | -3.57253 | H | 3.65903  | 3.98203  | -2.38352 |
| C  | 0.65036  | -2.35712 | -2.39047 | C | -4.21158 | -0.01465 | -0.14574 |
| C  | 2.90847  | -3.98985 | 0.32849  | C | -3.54871 | 2.37726  | -0.40364 |
| H  | 3.45201  | -3.04249 | 0.49187  | H | -2.63436 | 1.86940  | -0.04761 |
| C  | 2.13273  | -4.34175 | 1.61897  | C | -3.20689 | 3.09136  | -1.71903 |
| H  | 1.40648  | -3.55242 | 1.86372  | H | -2.97842 | 2.36532  | -2.51613 |
| H  | 2.81817  | -4.46995 | 2.47577  | H | -2.30908 | 3.70941  | -1.55545 |
| H  | 1.57840  | -5.28892 | 1.49101  | H | -4.01596 | 3.75533  | -2.06406 |
| C  | 3.93221  | -5.11247 | 0.04025  | C | -4.01172 | 3.33392  | 0.70582  |
| H  | 3.43971  | -6.09974 | -0.01657 | H | -4.22627 | 2.78136  | 1.63498  |
| H  | 4.67450  | -5.16929 | 0.85655  | H | -4.91112 | 3.90559  | 0.42024  |

|   |          |          |          |   |          |          |          |
|---|----------|----------|----------|---|----------|----------|----------|
| H | -3.20209 | 4.05344  | 0.91034  | H | -1.30160 | -2.03088 | -2.19945 |
| C | -5.77915 | 1.30025  | -1.17733 | C | 0.59303  | -3.05918 | -2.07591 |
| C | -6.41275 | 2.51756  | -1.77928 | H | 0.98248  | -2.43025 | -1.25800 |
| H | -6.36427 | 3.39038  | -1.10783 | H | 0.97925  | -2.66894 | -3.03489 |
| H | -7.47705 | 2.32009  | -1.98126 | H | 1.00338  | -4.07713 | -1.94924 |
| H | -5.94343 | 2.80620  | -2.73565 | C | -1.47758 | -3.90482 | -3.26366 |
| C | -6.29118 | 0.02126  | -1.09804 | H | -1.07502 | -3.51918 | -4.21794 |
| C | -7.60650 | -0.51328 | -1.57405 | H | -2.57784 | -3.88083 | -3.32742 |
| H | -8.20036 | -0.95836 | -0.75575 | H | -1.17241 | -4.96322 | -3.17602 |
| H | -7.48780 | -1.28244 | -2.35854 | C | -3.74687 | -2.58510 | 2.27611  |
| H | -8.20697 | 0.30077  | -2.00779 | H | -4.03561 | -1.66027 | 1.75066  |
| C | -5.48089 | -2.21056 | -0.16804 | C | -3.02408 | -2.18874 | 3.58346  |
| H | -6.43751 | -2.48610 | -0.64235 | H | -3.69320 | -1.60781 | 4.24341  |
| C | -4.37047 | -3.05189 | -0.81504 | H | -2.13084 | -1.57601 | 3.37548  |
| H | -4.31905 | -2.87253 | -1.90127 | H | -2.69373 | -3.08208 | 4.14322  |
| H | -4.57453 | -4.12265 | -0.64771 | C | -5.03867 | -3.36863 | 2.59849  |
| H | -3.38441 | -2.81614 | -0.38034 | H | -4.82131 | -4.30701 | 3.13940  |
| C | -5.61040 | -2.44253 | 1.34592  | H | -5.59513 | -3.63374 | 1.68398  |
| H | -4.67627 | -2.16242 | 1.86120  | H | -5.70620 | -2.76494 | 3.23903  |
| H | -5.81188 | -3.50801 | 1.54645  | C | -5.01204 | -3.43552 | -1.47652 |
| H | -6.43371 | -1.84511 | 1.77182  | H | -4.23941 | -4.07389 | -1.93307 |
| C | 0.41283  | -0.75462 | 1.61569  | H | -5.91353 | -3.47890 | -2.11302 |
| C | -1.10314 | -1.82210 | 3.29766  | H | -5.26450 | -3.87948 | -0.49992 |
| H | -0.18526 | -1.89725 | 3.90077  | C | -4.24864 | -0.90410 | -3.06467 |
| C | 2.14166  | -1.37947 | 3.46836  | H | -3.91742 | 0.14727  | -3.04684 |
| H | 1.62559  | -2.33369 | 3.69592  | H | -5.20873 | -0.94046 | -3.61007 |
| C | -1.57805 | -3.25305 | 2.98377  | H | -3.50760 | -1.48115 | -3.64269 |
| H | -2.50012 | -3.22292 | 2.37397  | C | -5.90056 | -0.70778 | -0.44815 |
| H | -0.81710 | -3.80721 | 2.41153  | H | -6.81174 | -1.06332 | -0.97400 |
| H | -1.79778 | -3.81143 | 3.91164  | H | -5.98956 | -1.10442 | 0.58134  |
| C | -2.15009 | -1.06744 | 4.13579  | C | -5.88153 | 0.83690  | -0.43477 |
| H | -3.08757 | -0.94389 | 3.55945  | H | -6.86374 | 1.21867  | -0.08396 |
| H | -2.38838 | -1.61981 | 5.06207  | H | -5.77329 | 1.22344  | -1.46543 |
| H | -1.79235 | -0.06136 | 4.40900  | C | -5.17530 | 3.56533  | 0.76248  |
| C | 1.86126  | -0.38374 | 4.61156  | H | -4.46857 | 4.18501  | 1.33678  |
| H | 0.78851  | -0.14911 | 4.70188  | H | -6.15244 | 3.59920  | 1.27689  |
| H | 2.20557  | -0.79477 | 5.57747  | H | -5.29603 | 4.03980  | -0.22334 |
| H | 2.40014  | 0.56203  | 4.43114  | C | -4.78352 | 1.07561  | 2.45494  |
| C | 3.64522  | -1.68689 | 3.39999  | H | -4.28022 | 0.10883  | 2.60377  |
| H | 3.97576  | -2.18990 | 4.32544  | H | -5.85182 | 0.93999  | 2.70291  |
| H | 3.88116  | -2.34110 | 2.54684  | H | -4.35918 | 1.78765  | 3.18200  |
| H | 4.22712  | -0.75753 | 3.29650  | C | -2.25693 | 2.90367  | -0.12928 |

#### Ag,N

SCF (BP86) Energy = -2365.34260426  
 Enthalpy 0K = -2364.060944  
 Enthalpy 298K = -2364.060000  
 Free Energy 298K = -2364.252394  
 Lowest Frequency = 8.5166 cm<sup>-1</sup>  
 Second Frequency = 11.6306 cm<sup>-1</sup>  
 SCF (BP86-D3BJ) Energy = -2365.72104556  
 SCF (C6H6) Energy = -2365.34951141  
 SCF (BS2) Energy = -3177.53230737

|    |          |          |          |
|----|----------|----------|----------|
| Ag | 3.08432  | -0.33157 | 0.47735  |
| Si | -4.45293 | -1.62053 | -1.30750 |
| Si | -4.60736 | 1.74379  | 0.67286  |
| Al | -1.91394 | 0.04226  | -0.09679 |
| N  | -2.91345 | -1.52594 | -0.38756 |
| N  | -2.92306 | 1.63149  | 0.04636  |
| N  | -0.14741 | 0.29092  | -0.80796 |
| N  | 1.09854  | -0.45260 | 1.14749  |
| C  | -2.39556 | -2.79510 | 0.07406  |
| C  | -1.49514 | -3.56650 | -0.73113 |
| C  | -1.07893 | -4.83900 | -0.28897 |
| H  | -0.40568 | -5.42643 | -0.92478 |
| C  | -1.50330 | -5.37254 | 0.93167  |
| H  | -1.17005 | -6.36522 | 1.25353  |
| C  | -2.35771 | -4.61108 | 1.73482  |
| H  | -2.69044 | -5.01245 | 2.69964  |
| C  | -2.81378 | -3.34115 | 1.33256  |
| C  | -0.95269 | -3.07029 | -2.07274 |

|   |          |          |          |
|---|----------|----------|----------|
| H | -1.30160 | -2.03088 | -2.19945 |
| C | 0.59303  | -3.05918 | -2.07591 |
| H | 0.98248  | -2.43025 | -1.25800 |
| H | 0.97925  | -2.66894 | -3.03489 |
| H | 1.00338  | -4.07713 | -1.94924 |
| C | -1.47758 | -3.90482 | -3.26366 |
| H | -1.07502 | -3.51918 | -4.21794 |
| H | -2.57784 | -3.88083 | -3.32742 |
| H | -1.17241 | -4.96322 | -3.17602 |
| C | -3.74687 | -2.58510 | 2.27611  |
| H | -4.03561 | -1.66027 | 1.75066  |
| C | -3.02408 | -2.18874 | 3.58346  |
| H | -3.69320 | -1.60781 | 4.24341  |
| H | -2.13084 | -1.57601 | 3.37548  |
| H | -2.69373 | -3.08208 | 4.14322  |
| C | -5.03867 | -3.36863 | 2.59849  |
| H | -4.82131 | -4.30701 | 3.13940  |
| H | -5.59513 | -3.63374 | 1.68398  |
| H | -5.70620 | -2.76494 | 3.23903  |
| C | -5.01204 | -3.43552 | -1.47652 |
| H | -4.23941 | -4.07389 | -1.93307 |
| H | -5.91353 | -3.47890 | -2.11302 |
| H | -5.26450 | -3.87948 | -0.49992 |
| C | -4.24864 | -0.90410 | -3.06467 |
| H | -3.91742 | 0.14727  | -3.04684 |
| H | -5.20873 | -0.94046 | -3.61007 |
| H | -3.50760 | -1.48115 | -3.64269 |
| C | -5.90056 | -0.70778 | -0.44815 |
| H | -6.81174 | -1.06332 | -0.97400 |
| H | -5.98956 | -1.10442 | 0.58134  |
| C | -5.88153 | 0.83690  | -0.43477 |
| H | -6.86374 | 1.21867  | -0.08396 |
| H | -5.77329 | 1.22344  | -1.46543 |
| C | -5.17530 | 3.56533  | 0.76248  |
| H | -4.46857 | 4.18501  | 1.33678  |
| H | -6.15244 | 3.59920  | 1.27689  |
| H | -5.29603 | 4.03980  | -0.22334 |
| C | -4.78352 | 1.07561  | 2.45494  |
| H | -4.28022 | 0.10883  | 2.60377  |
| H | -5.85182 | 0.93999  | 2.70291  |
| H | -4.35918 | 1.78765  | 3.18200  |
| C | -2.25693 | 2.90367  | -0.12928 |
| C | -1.60910 | 3.55524  | 0.97154  |
| C | -1.03812 | 4.83095  | 0.79063  |
| H | -0.55643 | 5.32141  | 1.64522  |
| C | -1.08154 | 5.48861  | -0.44150 |
| H | -0.64415 | 6.48630  | -0.55849 |
| C | -1.69063 | 4.84743  | -1.52543 |
| H | -1.72060 | 5.35274  | -2.49714 |
| C | -2.26948 | 3.56833  | -1.40247 |
| C | -1.51282 | 2.92935  | 2.36508  |
| H | -1.98606 | 1.93370  | 2.31155  |
| C | -0.04316 | 2.72858  | 2.79699  |
| H | 0.49073  | 3.69401  | 2.86621  |
| H | 0.49510  | 2.08245  | 2.08547  |
| H | 0.00076  | 2.25433  | 3.79416  |
| C | -2.25866 | 3.76320  | 3.43296  |
| H | -2.20950 | 3.26487  | 4.41785  |
| H | -3.32121 | 3.90873  | 3.17824  |
| H | -1.80581 | 4.76480  | 3.54549  |
| C | -2.89660 | 2.93945  | -2.64949 |
| H | -2.94554 | 1.85203  | -2.45943 |
| C | -2.06650 | 3.18003  | -3.93167 |
| H | -2.42368 | 2.52455  | -4.74539 |
| H | -0.99300 | 2.98729  | -3.77815 |
| H | -2.16796 | 4.21988  | -4.29125 |
| C | -4.33724 | 3.43974  | -2.90793 |
| H | -5.01720 | 3.19925  | -2.07805 |
| H | -4.74879 | 2.98266  | -3.82607 |
| H | -4.34510 | 4.53636  | -3.04438 |
| C | 5.09924  | -0.12745 | -0.01810 |
| C | 5.25550  | 2.22991  | 0.78265  |

|   |          |          |          |   |          |          |          |
|---|----------|----------|----------|---|----------|----------|----------|
| C | 5.16823  | 3.37249  | -0.24146 | N | 0.01301  | -0.52669 | 0.99094  |
| H | 6.15728  | 3.78317  | -0.50369 | N | -5.80933 | 0.75809  | 0.24187  |
| H | 4.57123  | 4.19533  | 0.18522  | C | -0.77434 | -0.17338 | -0.06315 |
| H | 4.66972  | 3.03431  | -1.16364 | C | -4.99608 | -0.32444 | 0.01747  |
| C | 5.92811  | 2.63723  | 2.10280  | C | -7.16519 | 0.39215  | 0.22886  |
| H | 6.00230  | 1.77872  | 2.78986  | C | 0.93996  | 3.60525  | 0.83772  |
| H | 5.31543  | 3.41251  | 2.59177  | C | 1.85778  | 2.95670  | -0.05570 |
| H | 6.93474  | 3.05998  | 1.95344  | C | -7.19220 | -0.96745 | -0.00845 |
| C | 5.60764  | -2.41484 | -0.98272 | C | 1.88137  | -3.61395 | -0.75136 |
| C | 4.57626  | -2.40829 | -2.12116 | C | 2.65955  | -2.72986 | 0.06821  |
| H | 3.61300  | -1.99615 | -1.77703 | C | 2.17346  | 3.62299  | -1.29035 |
| H | 4.40241  | -3.43959 | -2.46994 | C | -0.55494 | -1.15748 | 2.18469  |
| H | 4.92869  | -1.80596 | -2.97479 | H | -1.63773 | -0.89428 | 2.19924  |
| C | 5.16109  | -3.24962 | 0.22749  | C | 1.16320  | -3.16422 | -2.02622 |
| H | 5.92655  | -3.24353 | 1.02103  | H | 1.31505  | -2.07606 | -2.13114 |
| H | 4.98936  | -4.29303 | -0.08487 | C | 0.51192  | 3.00063  | 2.17606  |
| H | 4.21985  | -2.85637 | 0.64827  | H | 0.98921  | 2.00950  | 2.25579  |
| C | -0.01842 | -0.17932 | 0.46499  | C | 3.27001  | -3.27465 | 1.24970  |
| C | 0.92654  | 0.65788  | -1.74250 | C | -0.48255 | 0.89731  | -2.30628 |
| H | 1.80256  | -0.00980 | -1.55294 | H | 0.42552  | 1.19236  | -2.86187 |
| C | 1.37827  | 2.11238  | -1.50348 | C | 0.97860  | 3.86230  | 3.37282  |
| H | 0.53695  | 2.80837  | -1.65931 | H | 2.06862  | 4.02676  | 3.36043  |
| H | 2.19798  | 2.38705  | -2.19317 | H | 0.71739  | 3.37555  | 4.32990  |
| H | 1.73273  | 2.24650  | -0.46726 | H | 0.49520  | 4.85586  | 3.36281  |
| C | 0.46580  | 0.43654  | -3.18873 | C | 3.69507  | 1.24040  | 3.09790  |
| H | -0.44536 | 1.02135  | -3.39249 | H | 3.07398  | 1.95486  | 3.66226  |
| H | 0.23391  | -0.62304 | -3.37580 | H | 4.66856  | 1.15972  | 3.61551  |
| H | 1.24488  | 0.75401  | -3.90432 | H | 3.20875  | 0.25364  | 3.15567  |
| C | 0.90249  | -1.08885 | 2.47378  | C | -5.43502 | -2.78381 | -0.38095 |
| H | -0.13092 | -0.84993 | 2.79261  | H | -6.37723 | -3.35182 | -0.45605 |
| C | 1.87695  | -0.51778 | 3.51762  | C | 4.54776  | 3.62724  | 1.43748  |
| H | 2.92400  | -0.75359 | 3.24422  | H | 4.92346  | 4.04798  | 0.49223  |
| H | 1.68288  | -0.95813 | 4.51171  | H | 5.36784  | 3.67480  | 2.17632  |
| H | 1.78221  | 0.57733  | 3.59608  | H | 3.73611  | 4.28502  | 1.78840  |
| C | 1.03458  | -2.61835 | 2.37478  | C | 0.40391  | 4.86586  | 0.50440  |
| H | 0.30444  | -3.03085 | 1.66096  | H | -0.28524 | 5.34933  | 1.20739  |
| H | 0.87184  | -3.09647 | 3.35734  | C | 5.42864  | 0.75792  | 0.60166  |
| H | 2.05035  | -2.88972 | 2.02776  | H | 6.33478  | 1.36251  | 0.81468  |
| H | 8.01265  | 2.78992  | -0.56584 | H | 5.53193  | -0.14210 | 1.23286  |
| N | 5.85552  | 0.99871  | 0.19630  | C | -0.45257 | -2.69491 | 2.13360  |
| N | 5.96733  | -1.02719 | -0.57536 | H | -0.96120 | -3.08913 | 1.23817  |
| H | 4.22370  | 1.90685  | 1.01490  | H | -0.92009 | -3.14662 | 3.02777  |
| H | 6.54664  | -2.84422 | -1.36959 | H | 0.59923  | -3.02315 | 2.08665  |
| C | 7.18200  | 0.80985  | -0.22376 | C | -0.35846 | -3.42119 | -1.93719 |
| C | 8.28372  | 1.82006  | -0.11774 | H | -0.57679 | -4.49144 | -1.77206 |
| H | 9.17421  | 1.45365  | -0.65137 | H | -0.85883 | -3.12228 | -2.87524 |
| H | 8.58340  | 2.00707  | 0.92808  | H | -0.80838 | -2.84499 | -1.11236 |
| C | 7.24961  | -0.47883 | -0.71349 | C | 5.26892  | -2.63223 | -1.68849 |
| C | 8.41465  | -1.22353 | -1.28847 | H | 5.86287  | -2.89755 | -0.79988 |
| H | 8.67695  | -2.11623 | -0.69269 | H | 5.97210  | -2.46377 | -2.52395 |
| H | 9.30319  | -0.57444 | -1.30803 | H | 4.64433  | -3.50473 | -1.93901 |
| H | 8.22902  | -1.55538 | -2.32558 | C | 4.08800  | -2.42832 | 2.22552  |

**S<sub>ag,N</sub>**

SCF (BP86) Energy = -2365.36903722  
 Enthalpy 0K = -2364.086667  
 Enthalpy 298K = -2364.085722  
 Free Energy 298K = -2364.273848  
 Lowest Frequency = 8.7334 cm<sup>-1</sup>  
 Second Frequency = 12.6452 cm<sup>-1</sup>  
 SCF (BP86-D3BJ) Energy = -2365.75597657  
 SCF (C6H6) Energy = -2365.37540051  
 SCF (BS2) Energy = -3177.55803299

|    |          |          |          |
|----|----------|----------|----------|
| Ag | -2.87950 | -0.28375 | -0.04550 |
| Si | 3.97263  | 1.81246  | 1.29317  |
| Al | 1.62580  | 0.03549  | 0.00471  |
| Si | 4.22631  | -1.05159 | -1.45068 |
| N  | 2.48311  | 1.69824  | 0.28944  |
| N  | 2.87471  | -1.34732 | -0.29922 |
| N  | 0.01819  | 0.27364  | -1.07464 |
| N  | -5.85788 | -1.37713 | -0.13298 |

|   |          |          |          |
|---|----------|----------|----------|
| N | 0.01301  | -0.52669 | 0.99094  |
| N | -5.80933 | 0.75809  | 0.24187  |
| C | -0.77434 | -0.17338 | -0.06315 |
| C | -4.99608 | -0.32444 | 0.01747  |
| C | -7.16519 | 0.39215  | 0.22886  |
| C | 0.93996  | 3.60525  | 0.83772  |
| C | 1.85778  | 2.95670  | -0.05570 |
| C | -7.19220 | -0.96745 | -0.00845 |
| C | 1.88137  | -3.61395 | -0.75136 |
| C | 2.65955  | -2.72986 | 0.06821  |
| C | 2.17346  | 3.62299  | -1.29035 |
| C | -0.55494 | -1.15748 | 2.18469  |
| H | -1.63773 | -0.89428 | 2.19924  |
| C | 1.16320  | -3.16422 | -2.02622 |
| H | 1.31505  | -2.07606 | -2.13114 |
| C | 0.51192  | 3.00063  | 2.17606  |
| H | 0.98921  | 2.00950  | 2.25579  |
| C | 3.27001  | -3.27465 | 1.24970  |
| C | -0.48255 | 0.89731  | -2.30628 |
| H | 0.42552  | 1.19236  | -2.86187 |
| C | 0.97860  | 3.86230  | 3.37282  |
| H | 2.06862  | 4.02676  | 3.36043  |
| H | 0.71739  | 3.37555  | 4.32990  |
| H | 0.49520  | 4.85586  | 3.36281  |
| C | 3.69507  | 1.24040  | 3.09790  |
| H | 3.07398  | 1.95486  | 3.66226  |
| H | 4.66856  | 1.15972  | 3.61551  |
| H | 3.20875  | 0.25364  | 3.15567  |
| C | -5.43502 | -2.78381 | -0.38095 |
| H | -6.37723 | -3.35182 | -0.45605 |
| C | 4.54776  | 3.62724  | 1.43748  |
| H | 4.92346  | 4.04798  | 0.49223  |
| H | 5.36784  | 3.67480  | 2.17632  |
| H | 3.73611  | 4.28502  | 1.78840  |
| C | 0.40391  | 4.86586  | 0.50440  |
| H | -0.28524 | 5.34933  | 1.20739  |
| C | 5.42864  | 0.75792  | 0.60166  |
| H | 6.33478  | 1.36251  | 0.81468  |
| H | 5.53193  | -0.14210 | 1.23286  |
| C | -0.45257 | -2.69491 | 2.13360  |
| H | -0.96120 | -3.08913 | 1.23817  |
| H | -0.92009 | -3.14662 | 3.02777  |
| H | 0.59923  | -3.02315 | 2.08665  |
| C | -0.35846 | -3.42119 | -1.93719 |
| H | -0.57679 | -4.49144 | -1.77206 |
| H | -0.85883 | -3.12228 | -2.87524 |
| H | -0.80838 | -2.84499 | -1.11236 |
| C | 5.26892  | -2.63223 | -1.68849 |
| H | 5.86287  | -2.89755 | -0.79988 |
| H | 5.97210  | -2.46377 | -2.52395 |
| H | 4.64433  | -3.50473 | -1.93901 |
| C | 4.08800  | -2.42832 | 2.22552  |
| H | 3.96524  | -1.37974 | 1.90992  |
| C | -8.32168 | 1.31636  | 0.46141  |
| H | -8.38224 | 1.65841  | 1.50932  |
| H | -9.26420 | 0.79499  | 0.23328  |
| H | -8.28242 | 2.21202  | -0.17994 |
| C | 0.73582  | 5.51849  | -0.68562 |
| H | 0.31690  | 6.50298  | -0.92103 |
| C | -1.26139 | -0.07989 | -3.20953 |
| H | -2.17923 | -0.43289 | -2.70314 |
| H | -0.64851 | -0.96014 | -3.45899 |
| H | -1.56057 | 0.41654  | -4.14998 |
| C | 1.76464  | -4.97442 | -0.40116 |
| H | 1.17630  | -5.63729 | -1.04693 |
| C | -1.29710 | 2.18140  | -2.04766 |
| H | -1.55459 | 2.67630  | -3.00130 |
| H | -0.73032 | 2.89050  | -1.42443 |
| H | -2.24168 | 1.93575  | -1.52602 |
| C | 0.08144  | -0.60281 | 3.46848  |
| H | 1.16964  | -0.78175 | 3.47551  |
| H | -0.34544 | -1.09715 | 4.35859  |

H -0.08295 0.48158 3.56203  
 C 3.58706 -0.59015 -3.19675  
 H 3.20291 -1.47429 -3.73128  
 H 4.40637 -0.16102 -3.80192  
 H 2.77571 0.15559 -3.16090  
 C -8.36146 -1.89642 -0.11909  
 H -8.40213 -2.40345 -1.09969  
 H -9.30075 -1.33461 -0.00317  
 H -8.35121 -2.67790 0.66185  
 C -1.01897 2.79635 2.24587  
 H -1.55600 3.75653 2.14114  
 H -1.30989 2.36181 3.21967  
 H -1.36470 2.11537 1.45056  
 C 1.61304 4.88512 -1.57008  
 H 1.87782 5.38316 -2.51011  
 C 3.12373 -4.64351 1.55010  
 H 3.60908 -5.04171 2.44893  
 C 5.40547 0.36610 -0.89233  
 H 6.41425 0.02243 -1.20267  
 H 5.20169 1.25221 -1.51807  
 C 2.38283 -5.50279 0.73455  
 H 2.28624 -6.56558 0.98189  
 C -4.68792 -2.91020 -1.71745  
 H -3.72857 -2.36613 -1.68294  
 H -5.28791 -2.50709 -2.54997  
 H -4.47274 -3.97176 -1.92328  
 C 3.11212 3.02793 -2.34199  
 H 3.30064 1.98464 -2.04196  
 C 3.58595 -2.56421 3.68146  
 H 2.50039 -2.39281 3.76033  
 H 4.09809 -1.83671 4.33568  
 H 3.79039 -3.57057 4.08883  
 C 5.59585 -2.76866 2.18158  
 H 5.76737 -3.83022 2.43543  
 H 6.15541 -2.15528 2.91076  
 H 6.03191 -2.58932 1.18618  
 C 1.73655 -3.86085 -3.28291  
 H 2.82354 -3.70476 -3.37996  
 H 1.25251 -3.47573 -4.19865  
 H 1.56254 -4.95145 -3.24912  
 C -5.23801 2.12147 0.42417  
 H -4.14989 1.92722 0.44737  
 C 2.49607 3.02515 -3.76038  
 H 2.40595 4.04849 -4.16663  
 H 1.48988 2.57611 -3.77658  
 H 3.13697 2.45360 -4.45426  
 C -5.52641 3.02709 -0.78388  
 H -5.21489 2.53880 -1.72116  
 H -6.59274 3.29605 -0.86518  
 C -4.63138 -3.33374 0.80774  
 H -4.40244 -4.39942 0.64148  
 H -5.19736 -3.24071 1.74937  
 H -3.67814 -2.78918 0.91971  
 C 4.47211 3.76308 -2.40048  
 H 5.11336 3.33306 -3.19102  
 H 5.02192 3.69597 -1.44906  
 H 4.32904 4.83428 -2.63046  
 C -5.63001 2.74850 1.77090  
 H -6.68420 3.06786 1.80001  
 H -5.00983 3.64362 1.94178  
 H -5.44860 2.04642 2.60078  
 H -4.95498 3.96423 -0.68017

**IAu**

SCF (BP86) Energy = -1969.49198123  
 Enthalpy 0K = -1968.422567  
 Enthalpy 298K = -1968.421622  
 Free Energy 298K = -1968.588167  
 Lowest Frequency = 15.9356 cm<sup>-1</sup>  
 Second Frequency = 16.1510 cm<sup>-1</sup>  
 SCF (BP86-D3BJ) Energy = -1969.81400010  
 SCF (C6H6) Energy = -1969.49626748

SCF (BS2) Energy = -2781.60167060

Au 1.34687 -0.00008 0.00010  
 Si -3.77146 -1.68474 -1.02449  
 Si -3.77144 1.68541 1.02403  
 Al -1.10164 0.00002 0.00006  
 N -2.10928 -1.54386 -0.35455  
 N -2.10907 1.54404 0.35464  
 N 4.35385 0.84886 -0.67121  
 N 4.35390 -0.84913 0.67109  
 C -1.38258 -2.78103 -0.17828  
 C -0.63844 -3.36832 -1.25103  
 C 0.04396 -4.58227 -1.03298  
 H 0.60614 -5.03076 -1.86095  
 C 0.01919 -5.22754 0.20825  
 H 0.55079 -6.17460 0.35299  
 C -0.70004 -4.64867 1.26072  
 H -0.72382 -5.14945 2.23562  
 C -1.40603 -3.44239 1.09173  
 C -0.55346 -2.72782 -2.63770  
 H -1.13331 -1.79017 -2.59592  
 C 0.89959 -2.35719 -3.00894  
 H 1.33042 -1.67529 -2.25329  
 H 0.93268 -1.85416 -3.99239  
 H 1.54343 -3.25327 -3.06987  
 C -1.17489 -3.62759 -3.73036  
 H -0.62487 -4.58088 -3.82651  
 H -1.14144 -3.12492 -4.71369  
 H -2.22710 -3.87392 -3.50936  
 C -2.16458 -2.85149 2.28058  
 H -2.82835 -2.06922 1.87255  
 C -1.18919 -2.16529 3.26470  
 H -0.48051 -2.89925 3.68907  
 H -1.73369 -1.69308 4.10226  
 H -0.59310 -1.38590 2.75633  
 C -3.04684 -3.88157 3.01694  
 H -3.74162 -4.38795 2.32556  
 H -3.64585 -3.38327 3.79947  
 H -2.44512 -4.66209 3.51586  
 C -4.29124 -3.51735 -1.05965  
 H -3.56835 -4.14818 -1.60103  
 H -5.27222 -3.61449 -1.55713  
 H -4.38678 -3.92662 -0.03987  
 C -3.88109 -0.97861 -2.79650  
 H -3.47727 0.04661 -2.85136  
 H -4.93396 -0.94093 -3.12936  
 H -3.32265 -1.59816 -3.51707  
 C -5.08833 -0.77192 0.01858  
 H -6.05323 -1.15563 -0.37472  
 H -5.03625 -1.13912 1.06134  
 C -5.08830 0.77265 -0.01912  
 H -6.05318 1.15641 0.37422  
 H -5.03624 1.13985 -1.06188  
 C -3.88166 0.97967 2.79616  
 H -3.47841 -0.04575 2.85125  
 H -4.93456 0.94266 3.12899  
 H -3.32290 1.59905 3.51663  
 C -4.29074 3.51816 1.05879  
 H -3.56824 4.14867 1.60105  
 H -5.27222 3.61555 1.55523  
 H -4.38504 3.92761 0.03897  
 C -1.38211 2.78108 0.17847  
 C -0.63789 3.36816 1.25129  
 C 0.04479 4.58196 1.03333  
 H 0.60702 5.03030 1.86135  
 C 0.02021 5.22730 -0.20787  
 H 0.55202 6.17425 -0.35253  
 C -0.69911 4.64866 -1.26040  
 H -0.72275 5.14950 -2.23527  
 C -1.40536 3.44252 -1.09151  
 C -0.55315 2.72758 2.63794  
 H -1.13325 1.79009 2.59610

|   |          |          |          |   |          |          |          |
|---|----------|----------|----------|---|----------|----------|----------|
| C | 0.89979  | 2.35654  | 3.00920  | H | -0.80513 | -4.99310 | -2.10155 |
| H | 1.33045  | 1.67457  | 2.25352  | C | -1.23135 | -5.15431 | 0.00981  |
| H | 0.93273  | 1.85347  | 3.99264  | H | -0.90667 | -6.19859 | 0.07777  |
| H | 1.54387  | 3.25245  | 3.07018  | C | -1.71419 | -4.48617 | 1.14165  |
| C | -1.17439 | 3.62749  | 3.73059  | H | -1.76222 | -5.01653 | 2.09979  |
| H | -0.62406 | 4.58059  | 3.82686  | C | -2.15212 | -3.14994 | 1.07391  |
| H | -1.14121 | 3.12475  | 4.71389  | C | -1.51048 | -2.46261 | -2.70291 |
| H | -2.22649 | 3.87419  | 3.50950  | H | -1.87486 | -1.42847 | -2.58149 |
| C | -2.16396 | 2.85178  | -2.28040 | C | -0.05569 | -2.38046 | -3.21627 |
| H | -2.82841 | 2.07009  | -1.87232 | H | 0.57585  | -1.81618 | -2.50526 |
| C | -1.18874 | 2.16453  | -3.26395 | H | -0.01818 | -1.86852 | -4.19495 |
| H | -0.47937 | 2.89784  | -3.68830 | H | 0.38597  | -3.38490 | -3.34705 |
| H | -1.73327 | 1.69243  | -4.10154 | C | -2.41181 | -3.16729 | -3.74268 |
| H | -0.59337 | 1.38488  | -2.75512 | H | -2.08334 | -4.20685 | -3.92121 |
| C | -3.04527 | 3.88218  | -3.01744 | H | -2.37622 | -2.63737 | -4.71146 |
| H | -3.73982 | 4.38942  | -2.32646 | H | -3.46391 | -3.20553 | -3.41286 |
| H | -3.64449 | 3.38394  | -3.79985 | C | -2.66212 | -2.46510 | 2.34274  |
| H | -2.44286 | 4.66199  | -3.51662 | H | -3.18794 | -1.55049 | 2.01700  |
| C | 3.51126  | -0.00010 | 0.00002  | C | -1.48313 | -2.02374 | 3.24020  |
| C | 3.90764  | 1.96658  | -1.54974 | H | -0.89717 | -2.89838 | 3.57569  |
| H | 4.84255  | 2.42051  | -1.91939 | H | -1.84296 | -1.48906 | 4.13781  |
| C | 3.11867  | 1.43684  | -2.75669 | H | -0.79388 | -1.35498 | 2.69330  |
| H | 3.70025  | 0.68508  | -3.31588 | C | -3.66189 | -3.32587 | 3.14331  |
| H | 2.87781  | 2.27120  | -3.43626 | H | -4.50213 | -3.66334 | 2.51301  |
| H | 2.17299  | 0.97437  | -2.42408 | H | -4.07765 | -2.74585 | 3.98600  |
| C | 3.13611  | 3.02524  | -0.74888 | H | -3.18484 | -4.22509 | 3.57226  |
| H | 2.19083  | 2.61192  | -0.35728 | C | -5.18417 | -2.41289 | -0.71026 |
| H | 2.88840  | 3.87925  | -1.40007 | H | -4.70106 | -3.18472 | -1.33073 |
| H | 3.73491  | 3.39537  | 0.09993  | H | -6.20577 | -2.25168 | -1.09682 |
| C | 5.70032  | 0.54037  | -0.42751 | H | -5.26860 | -2.81619 | 0.31276  |
| C | 6.85210  | 1.29123  | -1.02066 | C | -4.33410 | -0.01760 | -2.48528 |
| H | 6.85654  | 1.25018  | -2.12477 | H | -3.68377 | 0.86727  | -2.59103 |
| H | 7.80171  | 0.85443  | -0.67478 | H | -5.37027 | 0.30166  | -2.69795 |
| H | 6.85559  | 2.35610  | -0.72611 | H | -4.04087 | -0.74428 | -3.26039 |
| C | 5.70035  | -0.54073 | 0.42718  | C | -5.14233 | 0.42566  | 0.44170  |
| C | 6.85216  | -1.29166 | 1.02018  | H | -6.20904 | 0.30823  | 0.15656  |
| H | 6.85678  | -1.25055 | 2.12430  | H | -5.07667 | 0.03539  | 1.47524  |
| H | 7.80176  | -0.85498 | 0.67413  | C | -4.75419 | 1.92115  | 0.39391  |
| H | 6.85550  | -2.35656 | 0.72569  | H | -5.54819 | 2.52816  | 0.87780  |
| C | 3.90773  | -1.96686 | 1.54963  | H | -4.71309 | 2.28258  | -0.65135 |
| H | 4.84267  | -2.42080 | 1.91921  | C | -3.27267 | 1.77379  | 3.07728  |
| C | 3.13617  | -3.02551 | 0.74880  | H | -3.13368 | 0.67935  | 3.10082  |
| H | 2.19077  | -2.61225 | 0.35742  | H | -4.26548 | 1.99389  | 3.50920  |
| H | 2.88869  | -3.87962 | 1.39994  | H | -2.51201 | 2.22262  | 3.73675  |
| H | 3.73484  | -3.39547 | -0.10017 | C | -3.18010 | 4.35996  | 1.35613  |
| C | 3.11885  | -1.43715 | 2.75664  | H | -2.26292 | 4.77631  | 1.80248  |
| H | 3.70053  | -0.68551 | 3.31590  | H | -4.04061 | 4.70355  | 1.95657  |
| H | 2.87791  | -2.27155 | 3.43613  | H | -3.27981 | 4.79029  | 0.34540  |
| H | 2.17321  | -0.97455 | 2.42410  | C | -0.63940 | 2.89135  | 0.21163  |

**TS (I-II)<sub>Au</sub>**

SCF (BP86) Energy = -1969.47736011  
 Enthalpy 0K = -1968.408874  
 Enthalpy 298K = -1968.407930  
 Free Energy 298K = -1968.572007  
 Lowest Frequency = -58.6604 cm<sup>-1</sup>  
 Second Frequency = 12.9604 cm<sup>-1</sup>  
 SCF (BP86-D3BJ) Energy = -1969.79862283  
 SCF (C6H6) Energy = -1969.48168770  
 SCF (BS2) Energy = -2781.58760099

|    |          |          |          |
|----|----------|----------|----------|
| Au | 1.24117  | -0.37778 | -0.19963 |
| Si | -4.22116 | -0.76965 | -0.73255 |
| Si | -3.15559 | 2.45590  | 1.29628  |
| Al | -1.12925 | 0.15492  | 0.03223  |
| N  | -2.51948 | -1.07043 | -0.23996 |
| N  | -1.65871 | 1.90127  | 0.47473  |
| N  | 4.39916  | 0.24871  | -0.50794 |
| N  | 4.03731  | -1.66902 | 0.45733  |
| C  | -2.09119 | -2.44978 | -0.17344 |
| C  | -1.59733 | -3.13237 | -1.33003 |
| C  | -1.17897 | -4.47319 | -1.21123 |

|   |          |          |          |
|---|----------|----------|----------|
| H | -0.80513 | -4.99310 | -2.10155 |
| C | -1.23135 | -5.15431 | 0.00981  |
| H | -0.90667 | -6.19859 | 0.07777  |
| C | -1.71419 | -4.48617 | 1.14165  |
| H | -1.76222 | -5.01653 | 2.09979  |
| C | -2.15212 | -3.14994 | 1.07391  |
| C | -1.51048 | -2.46261 | -2.70291 |
| H | -1.87486 | -1.42847 | -2.58149 |
| C | -0.05569 | -2.38046 | -3.21627 |
| H | 0.57585  | -1.81618 | -2.50526 |
| H | -0.01818 | -1.86852 | -4.19495 |
| H | 0.38597  | -3.38490 | -3.34705 |
| C | -2.41181 | -3.16729 | -3.74268 |
| H | -2.08334 | -4.20685 | -3.92121 |
| H | -2.37622 | -2.63737 | -4.71146 |
| H | -3.46391 | -3.20553 | -3.41286 |
| C | -2.66212 | -2.46510 | 2.34274  |
| H | -3.18794 | -1.55049 | 2.01700  |
| C | -1.48313 | -2.02374 | 3.24020  |
| H | -0.89717 | -2.89838 | 3.57569  |
| H | -1.84296 | -1.48906 | 4.13781  |
| H | -0.79388 | -1.35498 | 2.69330  |
| C | -3.66189 | -3.32587 | 3.14331  |
| H | -4.50213 | -3.66334 | 2.51301  |
| H | -4.07765 | -2.74585 | 3.98600  |
| H | -3.18484 | -4.22509 | 3.57226  |
| C | -5.18417 | -2.41289 | -0.71026 |
| H | -4.70106 | -3.18472 | -1.33073 |
| H | -6.20577 | -2.25168 | -1.09682 |
| H | -5.26860 | -2.81619 | 0.31276  |
| C | -4.33410 | -0.01760 | -2.48528 |
| H | -3.68377 | 0.86727  | -2.59103 |
| H | -5.37027 | 0.30166  | -2.69795 |
| H | -4.04087 | -0.74428 | -3.26039 |
| C | -5.14233 | 0.42566  | 0.44170  |
| H | -6.20904 | 0.30823  | 0.15656  |
| H | -5.07667 | 0.03539  | 1.47524  |
| C | -4.75419 | 1.92115  | 0.39391  |
| H | -5.54819 | 2.52816  | 0.87780  |
| H | -4.71309 | 2.28258  | -0.65135 |
| C | -3.27267 | 1.77379  | 3.07728  |
| H | -3.13368 | 0.67935  | 3.10082  |
| H | -4.26548 | 1.99389  | 3.50920  |
| H | -2.51201 | 2.22262  | 3.73675  |
| C | -3.18010 | 4.35996  | 1.35613  |
| H | -2.26292 | 4.77631  | 1.80248  |
| H | -4.04061 | 4.70355  | 1.95657  |
| H | -3.27981 | 4.79029  | 0.34540  |
| C | -0.63940 | 2.89135  | 0.21163  |
| C | 0.34397  | 3.22992  | 1.19580  |
| C | 1.33213  | 4.18554  | 0.88325  |
| H | 2.07712  | 4.44587  | 1.64502  |
| C | 1.38019  | 4.81276  | -0.36695 |
| H | 2.15214  | 5.55915  | -0.58556 |
| C | 0.41774  | 4.48358  | -1.32902 |
| H | 0.44489  | 4.97595  | -2.30820 |
| C | -0.59459 | 3.54176  | -1.06348 |
| C | 0.36316  | 2.59588  | 2.58777  |
| H | -0.45205 | 1.85309  | 2.61412  |
| C | 1.68359  | 1.84286  | 2.86219  |
| H | 1.85333  | 1.06906  | 2.09143  |
| H | 1.65110  | 1.35119  | 3.85135  |
| H | 2.55016  | 2.52891  | 2.85939  |
| C | 0.09882  | 3.63893  | 3.69809  |
| H | 0.89275  | 4.40687  | 3.72335  |
| H | 0.07436  | 3.15366  | 4.69041  |
| H | -0.86148 | 4.16113  | 3.55073  |
| C | -1.61142 | 3.21770  | -2.15861 |
| H | -2.42041 | 2.64228  | -1.67554 |
| C | -0.98342 | 2.31461  | -3.24521 |
| H | -0.14764 | 2.83124  | -3.75086 |
| H | -1.72826 | 2.04075  | -4.01399 |

|   |          |          |          |   |          |          |          |
|---|----------|----------|----------|---|----------|----------|----------|
| H | -0.58005 | 1.38329  | -2.80845 | H | -1.25407 | -4.45224 | -3.86613 |
| C | -2.24082 | 4.47588  | -2.79369 | H | -1.61694 | -2.93816 | -4.73152 |
| H | -2.68678 | 5.13545  | -2.03002 | H | -2.77231 | -3.58577 | -3.53266 |
| H | -3.03547 | 4.19000  | -3.50524 | C | -2.59202 | -2.61998 | 2.26881  |
| H | -1.49917 | 5.07102  | -3.35583 | H | -3.15683 | -1.75817 | 1.87190  |
| C | 3.40410  | -0.66908 | -0.23362 | C | -1.53975 | -2.06902 | 3.25922  |
| C | 4.16650  | 1.51492  | -1.29247 | H | -0.92668 | -2.88880 | 3.67543  |
| H | 3.91444  | 2.30158  | -0.55643 | H | -2.02294 | -1.54289 | 4.10230  |
| C | 5.40668  | 1.94809  | -2.10055 | H | -0.85117 | -1.36361 | 2.75941  |
| H | 6.22495  | 2.35038  | -1.49046 | C | -3.59084 | -3.54531 | 2.99531  |
| H | 5.09862  | 2.74905  | -2.79135 | H | -4.34225 | -3.95640 | 2.29993  |
| H | 5.79087  | 1.11271  | -2.71093 | H | -4.12451 | -2.98841 | 3.78556  |
| C | 2.99412  | 1.37534  | -2.27462 | H | -3.08617 | -4.39832 | 3.48301  |
| H | 3.19046  | 0.57654  | -3.01019 | C | -4.81336 | -2.93100 | -1.03703 |
| H | 2.87942  | 2.33229  | -2.80897 | H | -4.19256 | -3.65875 | -1.58391 |
| H | 2.03609  | 1.16033  | -1.77071 | H | -5.80396 | -2.89100 | -1.52307 |
| C | 5.62029  | -0.14977 | 0.08075  | H | -4.95301 | -3.31912 | -0.01415 |
| C | 6.90203  | 0.62817  | 0.14847  | C | -4.04614 | -0.49673 | -2.79865 |
| H | 7.44724  | 0.67065  | -0.80913 | H | -3.48893 | 0.45300  | -2.86742 |
| H | 7.56924  | 0.14911  | 0.88206  | H | -5.08341 | -0.29989 | -3.12446 |
| H | 6.73986  | 1.66332  | 0.49368  | H | -3.59685 | -1.20223 | -3.51647 |
| C | 5.38497  | -1.37135 | 0.67461  | C | -5.19409 | -0.07975 | 0.01559  |
| C | 6.32256  | -2.27290 | 1.41763  | H | -6.20721 | -0.32054 | -0.36979 |
| H | 5.96181  | -2.50362 | 2.43564  | H | -5.19285 | -0.43576 | 1.06347  |
| H | 7.30963  | -1.79675 | 1.51866  | C | -4.96470 | 1.44767  | -0.04583 |
| H | 6.48018  | -3.23362 | 0.89415  | H | -5.86562 | 1.97583  | 0.33154  |
| C | 3.38623  | -2.90995 | 0.96673  | H | -4.85081 | 1.78578  | -1.09348 |
| H | 4.22745  | -3.56622 | 1.24739  | C | -3.76815 | 1.52387  | 2.77804  |
| C | 2.57857  | -3.61859 | -0.12832 | H | -3.51267 | 0.45292  | 2.85296  |
| H | 1.70204  | -3.01931 | -0.42660 | H | -4.81999 | 1.63910  | 3.09592  |
| H | 2.21205  | -4.58437 | 0.25641  | H | -3.13745 | 2.06993  | 3.49843  |
| H | 3.19885  | -3.80622 | -1.02043 | C | -3.76989 | 4.06619  | 0.98900  |
| C | 2.55612  | -2.61502 | 2.22603  | H | -2.95742 | 4.58956  | 1.51796  |
| H | 3.16767  | -2.13017 | 3.00567  | H | -4.72358 | 4.32726  | 1.48031  |
| H | 2.14816  | -3.55479 | 2.63365  | H | -3.80073 | 4.46054  | -0.04071 |
| H | 1.71239  | -1.94846 | 1.97389  | C | -0.98294 | 2.86035  | 0.16243  |

## II<sub>Au</sub>

SCF (BP86) Energy = -1969.49191552  
 Enthalpy 0K = -1968.422359  
 Enthalpy 298K = -1968.421415  
 Free Energy 298K = -1968.589666  
 Lowest Frequency = 12.7854 cm<sup>-1</sup>  
 Second Frequency = 13.7277 cm<sup>-1</sup>  
 SCF (BP86-D3BJ) Energy = -1969.81027942  
 SCF (C6H6) Energy = -1969.49618756  
 SCF (BS2) Energy = -2781.60195959

|    |          |          |          |   |          |          |          |
|----|----------|----------|----------|---|----------|----------|----------|
| Au | 1.27083  | -0.23897 | 0.08329  | H | 1.06778  | 1.65829  | 4.05552  |
| Si | -4.03392 | -1.19294 | -1.01900 | H | 1.92755  | 2.90876  | 3.11879  |
| Si | -3.53675 | 2.17536  | 0.99669  | C | -0.70188 | 3.75539  | 3.69179  |
| Al | -1.15352 | 0.08169  | 0.03274  | H | -0.00100 | 4.60516  | 3.77742  |
| N  | -2.36987 | -1.29291 | -0.34833 | H | -0.77510 | 3.28421  | 4.68844  |
| N  | -1.91162 | 1.76993  | 0.35024  | H | -1.69240 | 4.16829  | 3.43662  |
| N  | 4.27794  | 0.51983  | -0.47163 | C | -1.69504 | 2.99812  | -2.31558 |
| N  | 4.23785  | -1.38962 | 0.55789  | H | -2.48176 | 2.34122  | -1.90521 |
| C  | -1.80989 | -2.61640 | -0.19119 | C | -0.83380 | 2.14808  | -3.27836 |
| C  | -1.14489 | -3.27616 | -1.27327 | H | -0.01372 | 2.75202  | -3.70746 |
| C  | -0.61290 | -4.56567 | -1.07134 | H | -1.44043 | 1.75616  | -4.11457 |
| H  | -0.10993 | -5.06858 | -1.90612 | H | -0.37382 | 1.29132  | -2.75334 |
| C  | -0.71244 | -5.21715 | 0.16296  | C | -2.38897 | 4.14832  | -3.07564 |
| H  | -0.29757 | -6.22253 | 0.29576  | H | -3.00284 | 4.76764  | -2.39985 |
| C  | -1.35621 | -4.56900 | 1.22388  | H | -3.04893 | 3.74464  | -3.86365 |
| H  | -1.43813 | -5.07447 | 2.19316  | H | -1.66142 | 4.81613  | -3.57069 |
| C  | -1.91251 | -3.28473 | 1.07096  | C | 3.42149  | -0.40263 | 0.07462  |
| C  | -0.98676 | -2.63279 | -2.65231 | C | 3.75616  | 1.74880  | -1.13263 |
| H  | -1.46234 | -1.63878 | -2.60086 | H | 2.67713  | 1.71455  | -0.89291 |
| C  | 0.49849  | -2.41502 | -3.01817 | C | 4.33129  | 3.03715  | -0.52518 |
| H  | 0.99568  | -1.78075 | -2.26127 | H | 4.29194  | 3.00493  | 0.57549  |
| H  | 0.58701  | -1.91807 | -4.00137 | H | 3.71294  | 3.88743  | -0.85550 |
| H  | 1.04538  | -3.37349 | -3.07709 | H | 5.36972  | 3.23142  | -0.84020 |
| C  | -1.70057 | -3.44786 | -3.75485 | C | 3.90243  | 1.67337  | -2.66070 |



H 4.95571 1.71420 -2.98657  
H 3.37887 2.52947 -3.11743  
H 3.44998 0.74705 -3.04954  
C 5.61600 0.11449 -0.34255  
C 6.80948 0.88847 -0.81387  
H 6.71917 1.20058 -1.86752  
H 7.71241 0.26288 -0.73595  
H 6.98612 1.79699 -0.21197  
C 5.58725 -1.09919 0.31470  
C 6.71789 -1.98912 0.72959  
H 6.77384 -2.11275 1.82627  
H 7.67626 -1.55746 0.40243  
H 6.64268 -2.99702 0.28356  
C 3.75451 -2.61140 1.25894  
H 4.67153 -3.16073 1.53164  
C 2.91734 -3.49058 0.31845  
H 1.98893 -2.97358 0.02207  
H 2.63662 -4.42469 0.83197  
H 3.48240 -3.74818 -0.59289  
C 3.00738 -2.24316 2.55021  
H 3.63154 -1.61562 3.20798  
H 2.73658 -3.16238 3.09583  
H 2.08015 -1.69247 2.31445

**TS(II-III)<sub>Au</sub>**

SCF (BP86) Energy = -2158.06381130  
Enthalpy 0K = -2156.979017  
Enthalpy 298K = -2156.978073  
Free Energy 298K = -2157.150832  
Lowest Frequency = -196.7411 cm<sup>-1</sup>  
Second Frequency = 7.2823 cm<sup>-1</sup>  
SCF (BP86-D3BJ) Energy = -2158.40386691  
SCF (C6H6) Energy = -2158.06791473  
SCF (BS2) Energy = -2970.23395978

Au 1.25042 -0.31578 -0.30314  
Si -3.97590 -0.96837 1.14783  
Si -3.41978 2.44877 -0.81068  
Al -1.18628 0.10411 -0.24056  
N -2.37930 -1.22894 0.35483  
N -1.79309 1.88593 -0.28467  
N 4.24790 -1.56722 -0.16076  
N 4.19945 0.50919 0.46857  
O -1.31283 -0.22770 -2.54258  
O 0.79445 -0.90953 -3.34692  
C -1.85818 -2.58101 0.37873  
C -2.06827 -3.46963 -0.72927  
C -1.56575 -4.78550 -0.66796  
H -1.74155 -5.45800 -1.51572  
C -0.86125 -5.25710 0.44359  
H -0.48687 -6.28639 0.47106  
C -0.65404 -4.39408 1.52420  
H -0.10991 -4.75565 2.40498  
C -1.13810 -3.07096 1.51953  
C -2.83958 -3.06952 -1.99090  
H -3.04680 -1.98908 -1.91729  
C -2.02463 -3.32914 -3.28024  
H -1.00107 -2.92712 -3.22110  
H -2.52600 -2.87466 -4.15270  
H -1.93320 -4.41120 -3.48393  
C -4.19148 -3.81222 -2.10762  
H -4.03703 -4.90427 -2.17309  
H -4.72960 -3.49510 -3.01885  
H -4.84364 -3.62141 -1.24236  
C -0.89398 -2.22402 2.77065  
H -1.35605 -1.23846 2.59403  
C 0.60950 -1.98988 3.03510  
H 1.14245 -2.94225 3.20935  
H 0.75152 -1.35819 3.93060  
H 1.08463 -1.48384 2.17429  
C -1.56178 -2.85111 4.01669  
H -2.63639 -3.03923 3.85433

H -1.45658 -2.18565 4.89228  
H -1.09504 -3.81779 4.27793  
C -4.89065 -2.62552 1.39598  
H -5.45081 -2.93437 0.49920  
H -5.62066 -2.50538 2.21585  
H -4.20727 -3.44626 1.66690  
C -3.88703 -0.19510 2.89615  
H -3.50023 -0.91103 3.63880  
H -4.91015 0.08506 3.20816  
H -3.26590 0.71224 2.94483  
C -5.10336 0.17241 0.10705  
H -5.08650 -0.16514 -0.94658  
H -6.12668 -0.05923 0.46970  
C -4.85030 1.69465 0.20983  
H -4.72847 1.99847 1.26692  
H -5.74464 2.24718 -0.14821  
C -3.78110 2.01908 -2.63636  
H -3.09244 2.53297 -3.32635  
H -4.81018 2.32755 -2.89435  
H -3.69796 0.93664 -2.82697  
C -3.55064 4.33581 -0.57880  
H -3.50544 4.61156 0.48812  
H -4.51733 4.68895 -0.97882  
H -2.74611 4.88387 -1.09396  
C -0.82641 2.92064 0.01129  
C -0.05488 3.54502 -1.02314  
C 0.83833 4.58498 -0.69377  
H 1.40817 5.06656 -1.49762  
C 1.01023 5.02158 0.20465  
H 1.69769 5.84322 0.85542  
C 0.27428 4.40073 1.64065  
H 0.39491 4.73718 2.67736  
C -0.64283 3.36943 1.36028  
C -0.15166 3.12817 -2.49149  
H -0.87465 2.29810 -2.54308  
C 1.20761 2.61311 -3.01920  
H 1.96475 3.41802 -3.02782  
H 1.11115 2.23926 -4.05434  
H 1.59354 1.79262 -2.38855  
C -0.67183 4.26973 -3.39486  
H -1.66448 4.62701 -3.07441  
H -0.75569 3.92757 -4.44196  
H 0.01341 5.13621 -3.38345  
C -1.41810 2.74879 2.51850  
H -2.18016 2.09718 2.05931  
C -0.49967 1.86193 3.38924  
H -0.00753 1.08116 2.78322  
H -1.07423 1.36439 4.19106  
H 0.29376 2.46516 3.86675  
C -2.14976 3.79373 3.38799  
H -1.44309 4.45352 3.92246  
H -2.76979 3.29145 4.15157  
H -2.81020 4.43572 2.78092  
C 3.40148 -0.50063 -0.00844  
C 3.86485 -2.88908 -0.73229  
H 4.75343 -3.52532 -0.58207  
C 2.69319 -3.51992 0.02989  
H 2.91661 -3.60356 1.10575  
H 2.49786 -4.52991 -0.36603  
H 1.76975 -2.92595 -0.08415  
C 3.60328 -2.76430 -2.24156  
H 4.47612 -2.33661 -2.76331  
H 2.73173 -2.11912 -2.43380  
H 3.39901 -3.76063 -2.66831  
C 5.55763 -1.23349 0.20899  
C 6.71032 -2.18727 0.14264  
H 6.55401 -3.07814 0.77714  
H 7.62851 -1.69248 0.49452  
H 6.90387 -2.54001 -0.88631  
C 5.52904 0.08541 0.61524  
C 6.66664 0.93187 1.10017  
H 6.43665 1.44085 2.05053

H 6.95579 1.70667 0.36890  
H 7.55119 0.29974 1.27502  
C 3.63506 1.85060 0.78949  
H 2.59140 1.77119 0.43251  
C 3.58927 2.10744 2.30360  
H 3.09810 1.27136 2.82651  
H 2.99916 3.01995 2.48818  
H 4.59159 2.25723 2.73970  
C 4.31722 2.97773 0.00032  
H 5.32355 3.21664 0.38161  
H 3.69762 3.88469 0.08778  
H 4.39321 2.72129 -1.06888  
C -0.16176 -0.54902 -2.74014

**III<sub>Au</sub>**

SCF (BP86) Energy = -2158.08634539  
Enthalpy 0K = -2157.000114  
Enthalpy 298K = -2156.999170  
Free Energy 298K = -2157.168523  
Lowest Frequency = 12.3741 cm<sup>-1</sup>  
Second Frequency = 20.2579 cm<sup>-1</sup>  
SCF (BP86-D3BJ) Energy = -2158.42855885  
SCF (C6H6) Energy = -2158.09292396  
SCF (BS2) Energy = -2970.25598638

Au 1.31054 -0.24659 -0.83375  
Si -3.58900 -1.33856 1.51497  
Si -3.70962 2.04297 -0.61700  
Al -1.35349 -0.05080 -0.47077  
N -2.07349 -1.44496 0.53917  
N -1.97760 1.69266 -0.24211  
N 3.82024 0.88716 0.73698  
N 4.23227 -1.07983 -0.09664  
O -1.35448 -0.48882 -2.28164  
O 0.57227 -0.95803 -3.39983  
C -1.40151 -2.72976 0.49474  
C -1.62489 -3.65490 -0.58058  
C -0.94072 -4.88845 -0.57446  
H -1.11617 -5.58994 -1.39798  
C -0.06627 -5.24932 0.45472  
H 0.44177 -6.21990 0.43874  
C 0.13364 -4.35759 1.51353  
H 0.80324 -4.63723 2.33597  
C -0.51321 -3.10734 1.55598  
C -2.61794 -3.41217 -1.72322  
H -2.99748 -2.38203 -1.62067  
C -1.97085 -3.54839 -3.12088  
H -1.10730 -2.88160 -3.25353  
H -2.71020 -3.29848 -3.90203  
H -1.63851 -4.58591 -3.30695  
C -3.81931 -4.38511 -1.63758  
H -3.49113 -5.43018 -1.78240  
H -4.55570 -4.15568 -2.42816  
H -4.33170 -4.33338 -0.66485  
C -0.26211 -2.21427 2.77316  
H -0.86539 -1.30198 2.63653  
C 1.21415 -1.77632 2.88440  
H 1.88439 -2.64457 3.02179  
H 1.35543 -1.10735 3.75289  
H 1.53547 -1.23941 1.97550  
C -0.71237 -2.90233 4.08255  
H -1.76397 -3.23083 4.03108  
H -0.60754 -2.21533 4.94151  
H -0.09963 -3.79623 4.29708  
C -4.27248 -3.08542 1.85993  
H -4.88301 -3.46090 1.02364  
H -4.92152 -3.04195 2.75220  
H -3.47460 -3.81991 2.05424  
C -3.41026 -0.52877 3.23762  
H -2.87881 -1.18643 3.94374  
H -4.42366 -0.35622 3.64469  
H -2.89078 0.44026 3.21755

C -4.95517 -0.37167 0.58509  
H -5.02202 -0.75734 -0.45022  
H -5.88931 -0.71341 1.07844  
C -4.90299 1.17502 0.60011  
H -4.69884 1.54770 1.62198  
H -5.90156 1.58303 0.33663  
C -4.16484 1.44354 -2.36924  
H -3.63724 2.02497 -3.14268  
H -5.25082 1.55398 -2.53944  
H -3.90308 0.38402 -2.52723  
C -4.04140 3.91106 -0.46967  
H -3.94828 4.25772 0.57264  
H -5.07135 4.12248 -0.80675  
H -3.35045 4.51216 -1.08106  
C -1.12293 2.83749 -0.03936  
C -0.49402 3.50526 -1.14240  
C 0.26044 4.67251 -0.90349  
H 0.71828 5.18810 -1.75603  
C 0.42810 5.19608 0.38354  
H 1.00204 6.11634 0.54060  
C -0.16557 4.53303 1.46442  
H -0.05097 4.93940 2.47677  
C -0.94087 3.37184 1.27852  
C -0.62171 3.02230 -2.58943  
H -1.19028 2.07809 -2.57592  
C 0.75974 2.73349 -3.22056  
H 1.35993 3.65605 -3.32148  
H 0.64160 2.29607 -4.22674  
H 1.33565 2.01616 -2.60971  
C -1.39714 4.02937 -3.47087  
H -2.41170 4.22028 -3.08390  
H -1.49401 3.64338 -4.50104  
H -0.87374 5.00088 -3.52627  
C -1.58171 2.71658 2.49884  
H -2.25061 1.93428 2.10418  
C -0.52448 2.02816 3.39066  
H 0.05598 1.28200 2.82128  
H -1.00240 1.50995 4.24117  
H 0.18502 2.76642 3.80583  
C -2.43177 3.69681 3.33592  
H -1.81212 4.48282 3.80359  
H -2.94800 3.15862 4.15058  
H -3.19740 4.19950 2.72163  
C 3.24464 -0.13799 0.03476  
C 3.10403 2.17608 0.95864  
H 2.06698 1.94672 0.65529  
C 3.08518 2.60468 2.43241  
H 2.77445 1.77458 3.08692  
H 2.34891 3.41700 2.54090  
H 4.05931 2.98642 2.77738  
C 3.64279 3.26491 0.01718  
H 3.62891 2.91738 -1.02826  
H 4.67179 3.56874 0.27436  
H 2.99161 4.15024 0.08967  
C 5.15599 0.59677 1.04997  
C 6.07772 1.47560 1.83966  
H 6.11286 2.50647 1.45121  
H 7.10186 1.07440 1.79228  
H 5.79333 1.52920 2.90478  
C 5.41387 -0.65172 0.51947  
C 6.67218 -1.46269 0.56089  
H 7.06080 -1.68522 -0.44872  
H 6.53220 -2.42436 1.08614  
H 7.45713 -0.90983 1.09881  
C 4.12685 -2.35188 -0.87415  
H 5.08803 -2.85984 -0.69059  
C 3.00740 -3.25549 -0.34409  
H 3.12574 -3.45228 0.73299  
H 3.03223 -4.21844 -0.87974  
H 2.01050 -2.81062 -0.50294  
C 4.01447 -2.06708 -2.38142  
H 3.05079 -1.59361 -2.63553

H 4.07733 -3.01749 -2.93738  
H 4.83233 -1.41139 -2.72481  
C -0.04862 -0.60978 -2.39455

**TS (III-IV)<sub>Au</sub>**

SCF (BP86) Energy = -2158.04127066  
Enthalpy 0K = -2156.956671  
Enthalpy 298K = -2156.955726  
Free Energy 298K = -2157.125691  
Lowest Frequency = -213.1480 cm<sup>-1</sup>  
Second Frequency = 12.5000 cm<sup>-1</sup>  
SCF (BP86-D3BJ) Energy = -2158.37171877  
SCF (C6H6) Energy = -2158.04819867  
SCF (BS2) Energy = -2970.21014990

Au -1.87807 0.29318 -0.96539  
Si 3.81002 1.44148 1.56938  
Si 4.05960 -2.02459 -0.43611  
Al 1.71414 0.07320 -0.49796  
N 2.34542 1.49247 0.52125  
N 2.31057 -1.66146 -0.19366  
N -4.63212 0.98289 0.05100  
N -4.05966 -1.03778 0.65486  
O 1.60565 0.46601 -2.34067  
O -0.59570 0.77775 -2.78728  
C 1.62822 2.74831 0.40025  
C 1.86880 3.64355 -0.69510  
C 1.12977 4.84197 -0.77467  
H 1.31797 5.52060 -1.61434  
C 0.17821 5.19351 0.18683  
H -0.37515 6.13544 0.10370  
C -0.04284 4.32976 1.26444  
H -0.77422 4.60310 2.03462  
C 0.66131 3.11677 1.39268  
C 2.92219 3.39778 -1.78091  
H 3.34504 2.39281 -1.61214  
C 2.32457 3.43456 -3.20682  
H 1.50265 2.71481 -3.32700  
H 3.10405 3.18530 -3.94845  
H 1.94720 4.44303 -3.45512  
C 4.07335 4.42882 -1.69108  
H 3.70557 5.44932 -1.90100  
H 4.85553 4.19816 -2.43610  
H 4.54136 4.44672 -0.69460  
C 0.37864 2.25225 2.62281  
H 1.01610 1.35631 2.54352  
C -1.08808 1.77333 2.67990  
H -1.78550 2.62473 2.78131  
H -1.24563 1.11014 3.54985  
H -1.36403 1.21955 1.76516  
C 0.74493 2.99370 3.92936  
H 1.78865 3.34997 3.91843  
H 0.61552 2.33244 4.80507  
H 0.09877 3.87678 4.08212  
C 4.46017 3.20724 1.87150  
H 5.07679 3.56579 1.03196  
H 5.09364 3.20836 2.77580  
H 3.64381 3.93120 2.02573  
C 3.54717 0.68560 3.30610  
H 2.96889 1.35596 3.96153  
H 4.53699 0.53597 3.77534  
H 3.03900 -0.29041 3.28433  
C 5.22271 0.44440 0.74581  
H 5.34370 0.79063 -0.29856  
H 6.13028 0.80614 1.27317  
C 5.17023 -1.10143 0.81813  
H 4.90238 -1.43450 1.83889  
H 6.18384 -1.51623 0.63463  
C 4.62385 -1.48567 -2.17729  
H 4.15360 -2.09901 -2.96285  
H 5.71968 -1.58574 -2.27487  
H 4.36346 -0.43418 -2.38725

C 4.37802 -3.88427 -0.19181  
H 4.24088 -4.17979 0.86148  
H 5.41906 -4.11734 -0.47596  
H 3.70753 -4.50984 -0.80151  
C 1.41588 -2.78348 -0.03303  
C 0.85617 -3.46431 -1.16432  
C 0.04111 -4.59603 -0.95381  
H -0.36677 -5.12089 -1.82569  
C -0.24332 -5.07585 0.32963  
H -0.85898 -5.97221 0.46570  
C 0.29122 -4.40358 1.43558  
H 0.08693 -4.77723 2.44647  
C 1.11386 -3.27108 1.28032  
C 1.12356 -3.03674 -2.60947  
H 1.70291 -2.09983 -2.57782  
C -0.18624 -2.75402 -3.38077  
H -0.78411 -3.67409 -3.51369  
H 0.03901 -2.35463 -4.38465  
H -0.81274 -2.01165 -2.85995  
C 1.96029 -4.09004 -3.37370  
H 2.93032 -4.28166 -2.88576  
H 2.16047 -3.74818 -4.40469  
H 1.42534 -5.05461 -3.44002  
C 1.66593 -2.59084 2.53010  
H 2.37569 -1.82663 2.17227  
C 0.54745 -1.86721 3.31291  
H 0.02095 -1.13662 2.67525  
H 0.96075 -1.32538 4.18238  
H -0.20071 -2.58699 3.69135  
C 2.43157 -3.55957 3.45721  
H 1.76580 -4.32916 3.88728  
H 2.88372 -3.00845 4.30082  
H 3.24008 -4.08320 2.92011  
C -3.60534 0.07482 -0.00725  
C -4.64794 2.32703 -0.59844  
H -5.61498 2.76056 -0.29455  
C -3.53416 3.23711 -0.06273  
H -3.57627 3.31408 1.03562  
H -3.65431 4.24703 -0.48856  
H -2.53530 2.86525 -0.34508  
C -4.63988 2.20159 -2.13148  
H -5.46185 1.55570 -2.48274  
H -3.68514 1.77937 -2.48683  
H -4.76567 3.20055 -2.58121  
C -5.72630 0.44074 0.74015  
C -7.00048 1.18709 0.98757  
H -6.84052 2.09874 1.59090  
H -7.70487 0.55000 1.54343  
H -7.50071 1.48867 0.04999  
C -5.36970 -0.83683 1.11749  
C -6.17743 -1.83656 1.88747  
H -5.80530 -1.97523 2.91729  
H -6.19153 -2.82591 1.40140  
H -7.22106 -1.49308 1.95735  
C -3.24960 -2.28674 0.73339  
H -2.25002 -1.95602 0.39845  
C -3.11418 -2.82150 2.16587  
H -2.84492 -2.01667 2.86874  
H -2.30062 -3.56441 2.17462  
H -4.02904 -3.31919 2.52491  
C -3.75602 -3.33899 -0.26545  
H -4.74592 -3.73916 0.01338  
H -3.04055 -4.17684 -0.29073  
H -3.82079 -2.91295 -1.27963  
C 0.33628 0.49025 -1.97569

**IV<sub>Au</sub>**

SCF (BP86) Energy = -2158.06411364  
Enthalpy 0K = -2156.978398  
Enthalpy 298K = -2156.977454  
Free Energy 298K = -2157.151156  
Lowest Frequency = 7.0177 cm<sup>-1</sup>

Second Frequency = 14.4979 cm<sup>-1</sup>  
 SCF (BP86-D3BJ) Energy = -2158.38206549  
 SCF (C6H6) Energy = -2158.07256546  
 SCF (BS2) Energy = -2970.23563061

Au 2.55547 -0.61714 -0.78882  
 Si -4.22744 -0.88231 1.96459  
 Si -3.97439 2.63790 0.14706  
 Al -2.02286 0.08637 -0.24711  
 N -3.11389 -1.15687 0.58440  
 N -2.34428 1.89660 -0.01201  
 N 5.37800 -1.38841 0.02442  
 N 4.93248 0.69117 0.51409  
 O -1.46025 -0.48634 -1.98284  
 O 0.73803 -0.80176 -1.74545  
 C -3.00878 -2.51078 0.07827  
 C -3.81600 -2.93479 -1.02405  
 C -3.70878 -4.26058 -1.48630  
 H -4.32920 -4.57881 -2.33243  
 C -2.83158 -5.17600 -0.89541  
 H -2.76690 -6.20401 -1.26838  
 C -2.03330 -4.75722 0.17389  
 H -1.33733 -5.46723 0.63696  
 C -2.09915 -3.44126 0.67255  
 C -4.78508 -1.99262 -1.74042  
 H -4.73635 -1.02345 -1.21262  
 C -4.36300 -1.75855 -3.20964  
 H -3.32861 -1.38571 -3.27194  
 H -5.03359 -1.02464 -3.69245  
 H -4.42313 -2.69541 -3.79252  
 C -6.24654 -2.49056 -1.67366  
 H -6.36564 -3.45905 -2.19147  
 H -6.92397 -1.76834 -2.16330  
 H -6.58849 -2.62676 -0.63377  
 C -1.18018 -3.05856 1.83454  
 H -1.36786 -1.99496 2.06016  
 C 0.31115 -3.19567 1.45263  
 H 0.57099 -4.24349 1.21630  
 H 0.95591 -2.87015 2.28935  
 H 0.55220 -2.57881 0.57066  
 C -1.48257 -3.87945 3.10889  
 H -2.53185 -3.76538 3.42916  
 H -0.83405 -3.55829 3.94409  
 H -1.30285 -4.95698 2.94392  
 C -5.24358 -2.45946 2.28479  
 H -5.93123 -2.67801 1.45173  
 H -5.84778 -2.32778 3.19953  
 H -4.60144 -3.34415 2.42152  
 C -3.29769 -0.44462 3.57455  
 H -2.71231 -1.30109 3.94750  
 H -4.01706 -0.15870 4.36299  
 H -2.60443 0.40053 3.43230  
 C -5.47507 0.52900 1.62682  
 H -5.99126 0.31732 0.67104  
 H -6.25135 0.39810 2.40974  
 C -4.95274 1.98471 1.65697  
 H -4.35212 2.16491 2.56929  
 H -5.81112 2.68507 1.73607  
 C -5.03601 2.30762 -1.40371  
 H -4.62504 2.81526 -2.29145  
 H -6.06831 2.67045 -1.25137  
 H -5.09385 1.22988 -1.63420  
 C -3.78647 4.51518 0.40539  
 H -3.30283 4.73975 1.37094  
 H -4.78321 4.98992 0.40716  
 H -3.18239 4.98900 -0.38450  
 C -1.21500 2.79103 -0.11951  
 C -0.78876 3.30956 -1.38435  
 C 0.28954 4.21743 -1.42698  
 H 0.60164 4.62155 -2.39709  
 C 0.95568 4.62656 -0.26687  
 H 1.76759 5.36114 -0.32212

C 0.55131 4.10431 0.96892  
 H 1.05765 4.43111 1.88510  
 C -0.51705 3.19288 1.06544  
 C -1.47092 2.93821 -2.70312  
 H -2.22606 2.16778 -2.47499  
 C -0.47965 2.33252 -3.72265  
 H 0.29106 3.06599 -4.02217  
 H -1.01652 2.02498 -4.63710  
 H 0.02648 1.44381 -3.31561  
 C -2.19629 4.15327 -3.32795  
 H -2.94450 4.58578 -2.64261  
 H -2.71550 3.85797 -4.25719  
 H -1.48154 4.95522 -3.58691  
 C -0.89170 2.62242 2.43231  
 H -1.90251 2.19259 2.32468  
 C 0.06346 1.46558 2.80988  
 H 0.06678 0.68040 2.03299  
 H -0.22943 1.00099 3.76851  
 H 1.09941 1.83640 2.91413  
 C -0.94304 3.67752 3.55606  
 H 0.05508 4.09274 3.78465  
 H -1.32512 3.22460 4.48777  
 H -1.60260 4.52119 3.29088  
 C 4.38595 -0.44518 -0.02573  
 C 5.25828 -2.79754 -0.45133  
 H 6.24649 -3.23954 -0.24296  
 C 4.20711 -3.57228 0.35830  
 H 4.42127 -3.52371 1.43863  
 H 4.21328 -4.63069 0.04931  
 H 3.19662 -3.16656 0.18470  
 C 5.01833 -2.85781 -1.96853  
 H 5.79492 -2.30036 -2.51786  
 H 4.03367 -2.43356 -2.22860  
 H 5.04181 -3.90858 -2.30192  
 C 6.54248 -0.84827 0.58705  
 C 7.80347 -1.62973 0.78911  
 H 7.66139 -2.48466 1.47426  
 H 8.57651 -0.98420 1.23250  
 H 8.20965 -2.02338 -0.15966  
 C 6.26434 0.46814 0.89391  
 C 7.16412 1.48493 1.52734  
 H 6.87549 1.71049 2.56853  
 H 7.17782 2.43620 0.97070  
 H 8.19676 1.10407 1.54730  
 C 4.16931 1.97255 0.57288  
 H 3.14249 1.66247 0.30894  
 C 4.12830 2.57345 1.98495  
 H 3.86441 1.81045 2.73530  
 H 3.34716 3.35040 2.00395  
 H 5.07869 3.04782 2.27729  
 C 4.64896 2.95934 -0.50246  
 H 5.65897 3.35218 -0.29573  
 H 3.95130 3.81185 -0.53762  
 H 4.65168 2.48159 -1.49540  
 C -0.38680 -0.45945 -1.21244

**Au**  
 SCF (BP86) Energy = -2158.07245010  
 Enthalpy 0K = -2156.986662  
 Enthalpy 298K = -2156.985718  
 Free Energy 298K = -2157.161986  
 Lowest Frequency = 6.9232 cm<sup>-1</sup>  
 Second Frequency = 8.8722 cm<sup>-1</sup>  
 SCF (BP86-D3BJ) Energy = -2158.38523880  
 SCF (C6H6) Energy = -2158.08022216  
 SCF (BS2) Energy = -2970.24414385

Au 2.66717 -0.49471 -0.72008  
 Si -4.43602 2.09678 -0.59598  
 Si -4.52956 -1.27077 1.54932  
 Al -2.01066 0.00115 -0.09025  
 N -2.71308 1.70232 -0.27962

N -3.03537 -1.38734 0.56449  
 N 5.67000 -0.83810 -0.26209  
 N 4.84081 0.83457 0.86712  
 O -0.12853 0.03216 0.39298  
 O 0.76059 -0.78911 -1.54301  
 C -1.75225 2.78347 -0.27028  
 C -1.38420 3.39709 0.96894  
 C -0.45141 4.45181 0.97047  
 H -0.18050 4.92078 1.92423  
 C 0.12396 4.92077 -0.21645  
 H 0.83422 5.75519 -0.19938  
 C -0.23072 4.31610 -1.42755  
 H 0.21687 4.67803 -2.36080  
 C -1.15401 3.25271 -1.48333  
 C -1.96046 2.92669 2.30455  
 H -2.73582 2.17739 2.06681  
 C -0.87986 2.23084 3.16470  
 H -0.41006 1.39726 2.61727  
 H -1.31624 1.83535 4.09965  
 H -0.08342 2.94492 3.44509  
 C -2.63499 4.06738 3.09752  
 H -1.90670 4.84195 3.39783  
 H -3.09781 3.67549 4.02066  
 H -3.42178 4.56458 2.50542  
 C -1.48548 2.65269 -2.85206  
 H -2.15897 1.79651 -2.67627  
 C -0.23083 2.11802 -3.57974  
 H 0.48929 2.92864 -3.79297  
 H -0.51519 1.66684 -4.54712  
 H 0.28338 1.34731 -2.98480  
 C -2.22530 3.66875 -3.75384  
 H -3.15266 4.03850 -3.28538  
 H -2.49216 3.20747 -4.72165  
 H -1.58958 4.54669 -3.96812  
 C -4.66758 3.98579 -0.55197  
 H -4.53907 4.37936 0.47023  
 H -5.68759 4.24237 -0.88743  
 H -3.94992 4.51197 -1.20102  
 C -5.01222 1.42729 -2.28873  
 H -4.52798 1.96030 -3.12310  
 H -6.10493 1.54781 -2.39854  
 H -4.78349 0.35348 -2.40080  
 C -5.61577 1.37449 0.72615  
 H -5.28924 1.73004 1.72215  
 H -6.57590 1.89867 0.53449  
 C -5.85605 -0.15392 0.74054  
 H -6.05690 -0.52923 -0.28111  
 H -6.77870 -0.37809 1.31624  
 C -4.18422 -0.56278 3.28955  
 H -3.59488 -1.26404 3.90261  
 H -5.13373 -0.36638 3.81928  
 H -3.62741 0.38859 3.24051  
 C -5.29956 -3.00212 1.72799  
 H -5.67063 -3.37838 0.76009  
 H -6.15384 -2.95997 2.42603  
 H -4.57707 -3.73905 2.11359  
 C -2.50934 -2.70492 0.26883  
 C -1.63951 -3.37291 1.18726  
 C -1.15159 -4.65467 0.86304  
 H -0.48910 -5.16486 1.57246  
 C -1.48779 -5.28688 -0.33848  
 H -1.09603 -6.28329 -0.57070  
 C -2.32941 -4.62744 -1.24092  
 H -2.59025 -5.11359 -2.18830  
 C -2.85218 -3.35073 -0.96143  
 C -1.21042 -2.74949 2.51737  
 H -1.65130 -1.73924 2.55973  
 C 0.32424 -2.59016 2.61281  
 H 0.83533 -3.56887 2.56986  
 H 0.60038 -2.11292 3.57073  
 H 0.70605 -1.96064 1.79306  
 C -1.74187 -3.55686 3.72421

H -2.84064 -3.65331 3.70226  
 H -1.46074 -3.06862 4.67485  
 H -1.32108 -4.57835 3.73826  
 C -3.74672 -2.68031 -2.00475  
 H -4.15070 -1.76530 -1.53637  
 C -2.92598 -2.25404 -3.24462  
 H -2.08613 -1.59742 -2.96170  
 H -3.56166 -1.71721 -3.97190  
 H -2.49970 -3.13574 -3.75606  
 C -4.94444 -3.56192 -2.42070  
 H -4.61539 -4.48212 -2.93552  
 H -5.60291 -3.01383 -3.11777  
 H -5.54792 -3.86723 -1.54894  
 C 4.50450 -0.16772 -0.00699  
 C 5.79906 -2.02434 -1.15634  
 H 6.86720 -2.29278 -1.10373  
 C 4.97795 -3.21136 -0.62741  
 H 5.25185 -3.45364 0.41265  
 H 5.16823 -4.09849 -1.25405  
 H 3.89837 -2.98655 -0.66034  
 C 5.46435 -1.66226 -2.61235  
 H 6.07992 -0.81831 -2.96518  
 H 4.40114 -1.38447 -2.71042  
 H 5.65904 -2.53166 -3.26205  
 C 6.73566 -0.25955 0.44147  
 C 8.14219 -0.76848 0.37782  
 H 8.23197 -1.80175 0.75866  
 H 8.79716 -0.13692 0.99685  
 H 8.54755 -0.75312 -0.64965  
 C 6.21351 0.80082 1.15454  
 C 6.92463 1.73873 2.08143  
 H 6.66974 1.55566 3.13974  
 H 6.69917 2.79492 1.86152  
 H 8.01293 1.60869 1.97817  
 C 3.82491 1.81827 1.34897  
 H 2.87664 1.39872 0.96654  
 C 3.73115 1.86298 2.88092  
 H 3.64788 0.84821 3.30248  
 H 2.82122 2.41883 3.15943  
 H 4.58816 2.37490 3.34772  
 C 4.02006 3.19667 0.69887  
 H 4.91623 3.72015 1.07328  
 H 3.14184 3.82461 0.92119  
 H 4.09700 3.10252 -0.39621  
 C -0.24797 -0.44005 -0.84017

**TS(III-S)<sub>Au</sub>**

SCF (BP86) Energy = -2158.08153390  
 Enthalpy 0K = -2156.996334  
 Enthalpy 298K = -2156.995390  
 Free Energy 298K = -2157.164183  
 Lowest Frequency = -42.1007 cm<sup>-1</sup>  
 Second Frequency = 16.0925 cm<sup>-1</sup>  
 SCF (BP86-D3BJ) Energy = -2158.41357735  
 SCF (C6H6) Energy = -2158.08908477  
 SCF (BS2) Energy = -2970.25200568

Au 1.70184 -0.41925 -0.83008  
 Si -3.73034 -1.20360 1.74160  
 Si -3.91399 2.10994 -0.45440  
 Al -1.61288 -0.01171 -0.42092  
 N -2.32576 -1.35815 0.60873  
 N -2.16282 1.73582 -0.21177  
 N 4.06692 0.93855 0.74386  
 N 4.61050 -1.05269 0.05871  
 O -1.07895 -0.50936 -2.04143  
 O 0.58939 -1.43496 -3.21103  
 C -1.77793 -2.69180 0.41475  
 C -2.15912 -3.48988 -0.71150  
 C -1.60036 -4.77649 -0.85093  
 H -1.89118 -5.38591 -1.71374  
 C -0.69305 -5.29491 0.07786

H -0.27768 -6.29995 -0.05392  
 C -0.32913 -4.51460 1.18030  
 H 0.37529 -4.91685 1.91817  
 C -0.85318 -3.22134 1.37070  
 C -3.17097 -3.03600 -1.76929  
 H -3.39986 -1.97325 -1.57373  
 C -2.61971 -3.14554 -3.20912  
 H -1.67707 -2.59174 -3.33130  
 H -3.35636 -2.73539 -3.92300  
 H -2.44679 -4.19947 -3.49243  
 C -4.49494 -3.82987 -1.66159  
 H -4.32377 -4.90659 -1.83929  
 H -5.21806 -3.47729 -2.41845  
 H -4.96336 -3.72855 -0.66937  
 C -0.42251 -2.44252 2.61672  
 H -0.94581 -1.47283 2.59217  
 C 1.09166 -2.14262 2.62340  
 H 1.68551 -3.07382 2.65369  
 H 1.36392 -1.54410 3.51194  
 H 1.38869 -1.58005 1.72025  
 C -0.82341 -3.17349 3.91889  
 H -1.90603 -3.37971 3.95922  
 H -0.55720 -2.56727 4.80354  
 H -0.30007 -4.14178 4.01227  
 C -4.42660 -2.93086 2.13589  
 H -5.01610 -3.34417 1.30245  
 H -5.09314 -2.85203 3.01283  
 H -3.63229 -3.65600 2.37314  
 C -3.30418 -0.39522 3.41747  
 H -2.73581 -1.08031 4.06670  
 H -4.24435 -0.14277 3.94082  
 H -2.72221 0.53233 3.30985  
 C -5.15346 -0.18730 0.96368  
 H -5.37271 -0.59966 -0.03962  
 H -6.03352 -0.45901 1.58358  
 C -5.01935 1.35373 0.91068  
 H -4.69252 1.75095 1.89060  
 H -6.01741 1.80677 0.73302  
 C -4.49973 1.39771 -2.12410  
 H -4.01604 1.91273 -2.96992  
 H -5.59318 1.51095 -2.23285  
 H -4.27000 0.32192 -2.22266  
 C -4.17929 3.99158 -0.41606  
 H -3.98965 4.40497 0.58808  
 H -5.22652 4.21626 -0.68371  
 H -3.52236 4.52217 -1.12279  
 C -1.25080 2.85740 -0.14423  
 C -0.66857 3.42043 -1.32546  
 C 0.14997 4.56294 -1.20726  
 H 0.57732 5.00041 -2.11692  
 C 0.41897 5.15659 0.03089  
 H 1.04049 6.05699 0.09297  
 C -0.13218 4.59132 1.18736  
 H 0.06587 5.05281 2.16228  
 C -0.96423 3.45686 1.12476  
 C -0.90569 2.85108 -2.72622  
 H -1.48538 1.92029 -2.61664  
 C 0.42227 2.48535 -3.42702  
 H 1.03193 3.38308 -3.63681  
 H 0.22259 1.98264 -4.38878  
 H 1.02421 1.79840 -2.80834  
 C -1.72085 3.82240 -3.61177  
 H -2.70416 4.05801 -3.17108  
 H -1.89304 3.38037 -4.60902  
 H -1.18517 4.77763 -3.75818  
 C -1.53936 2.89576 2.42368  
 H -2.27425 2.12875 2.12798  
 C -0.44484 2.20020 3.26452  
 H 0.05686 1.40177 2.69072  
 H -0.87401 1.74673 4.17584  
 H 0.32688 2.92324 3.58356  
 C -2.27305 3.95771 3.27103

H -1.58286 4.73541 3.64387  
 H -2.74345 3.48768 4.15271  
 H -3.06369 4.46540 2.69340  
 C 3.56495 -0.16562 0.10597  
 C 3.26705 2.19063 0.85585  
 H 2.25045 1.86364 0.57356  
 C 3.21181 2.74354 2.28657  
 H 2.94875 1.95586 3.01100  
 H 2.42736 3.51641 2.32362  
 H 4.15802 3.21313 2.59918  
 C 3.73165 3.22853 -0.17826  
 H 3.74404 2.78856 -1.18837  
 H 4.73739 3.62275 0.04738  
 H 3.02254 4.07193 -0.18212  
 C 5.41367 0.75444 1.09300  
 C 6.26810 1.74716 1.82089  
 H 6.24798 2.74393 1.35009  
 H 7.31522 1.40684 1.81783  
 H 5.96434 1.86983 2.87510  
 C 5.75435 -0.51068 0.65938  
 C 7.05653 -1.24055 0.77916  
 H 7.47753 -1.51230 -0.20524  
 H 6.96271 -2.16878 1.37099  
 H 7.79773 -0.60505 1.28726  
 C 4.59365 -2.37748 -0.63028  
 H 5.58015 -2.81412 -0.40207  
 C 3.51925 -3.31148 -0.05777  
 H 3.62520 -3.42028 1.03361  
 H 3.62130 -4.30699 -0.52087  
 H 2.50459 -2.93770 -0.27656  
 C 4.48362 -2.20428 -2.15489  
 H 3.49537 -1.80432 -2.43987  
 H 4.60696 -3.18448 -2.64511  
 H 5.26421 -1.52487 -2.53640  
 C 0.22445 -0.85777 -2.18526

**S<sub>Au</sub>**

SCF (BP86) Energy = -2158.12979348  
 Enthalpy 0K = -2157.043510  
 Enthalpy 298K = -2157.042565  
 Free Energy 298K = -2157.217498  
 Lowest Frequency = 4.9341 cm<sup>-1</sup>  
 Second Frequency = 9.8781 cm<sup>-1</sup>  
 SCF (BP86-D3BJ) Energy = -2158.44191750  
 SCF (C6H6) Energy = -2158.13752887  
 SCF (BS2) Energy = -2970.30012847

Au 2.42546 -0.10886 -0.05760  
 Si -4.50100 -1.54078 1.17085  
 Si -4.42950 1.78189 -1.03362  
 Al -1.91454 0.02542 0.01039  
 N -2.85994 -1.49727 0.44415  
 N -2.76205 1.61366 -0.38965  
 N 5.30373 0.65291 0.72013  
 N 5.34598 -0.89450 -0.80874  
 O -0.29927 0.31733 1.02061  
 O -0.35840 -0.37753 -1.05555  
 C -2.15800 -2.75137 0.26108  
 C -2.22960 -3.43218 -0.99594  
 C -1.55186 -4.65497 -1.16056  
 H -1.61130 -5.16918 -2.12724  
 C -0.81052 -5.22706 -0.12102  
 H -0.29810 -6.18484 -0.26467  
 C -0.73330 -4.55764 1.10466  
 H -0.15141 -4.99868 1.92274  
 C -1.38555 -3.32661 1.32011  
 C -3.00245 -2.86266 -2.18613  
 H -3.51048 -1.95022 -1.82732  
 C -2.04641 -2.45472 -3.33162  
 H -1.28037 -1.74594 -2.97812  
 H -2.60751 -1.98399 -4.15916  
 H -1.52496 -3.33816 -3.74285

C -4.08758 -3.83162 -2.70574  
 H -3.64381 -4.76203 -3.10290  
 H -4.66292 -3.36474 -3.52493  
 H -4.79636 -4.11629 -1.90979  
 C -1.24037 -2.66416 2.69275  
 H -1.73974 -1.68229 2.63588  
 C 0.23822 -2.41379 3.06745  
 H 0.79793 -3.36158 3.16471  
 H 0.30229 -1.88993 4.03805  
 H 0.74074 -1.79030 2.31118  
 C -1.93111 -3.49328 3.80084  
 H -3.00157 -3.65300 3.58936  
 H -1.84867 -2.98393 4.77795  
 H -1.46229 -4.48854 3.90341  
 C -5.09742 -3.34511 1.28251  
 H -5.29486 -3.76519 0.28231  
 H -6.03764 -3.38913 1.85953  
 H -4.36099 -3.99935 1.77540  
 C -4.52109 -0.76876 2.91722  
 H -3.95504 -1.38121 3.63779  
 H -5.55869 -0.68315 3.28707  
 H -4.08208 0.24354 2.92225  
 C -5.79446 -0.60061 0.11936  
 H -5.77807 -1.01497 -0.90687  
 H -6.76754 -0.92483 0.54504  
 C -5.73583 0.94527 0.08689  
 H -5.63380 1.35576 1.10972  
 H -6.70195 1.34405 -0.28829  
 C -4.59544 1.01098 -2.77273  
 H -4.02677 1.58224 -3.52449  
 H -5.65438 0.99760 -3.08764  
 H -4.22837 -0.02925 -2.79632  
 C -4.89106 3.62616 -1.12704  
 H -5.00454 4.06323 -0.12115  
 H -5.85330 3.73991 -1.65624  
 H -4.13288 4.22049 -1.66107  
 C -1.96142 2.81234 -0.24410  
 C -1.20550 3.33236 -1.34289  
 C -0.45726 4.51375 -1.16483  
 H 0.11120 4.91345 -2.01309  
 C -0.42344 5.18580 0.06141  
 H 0.16133 6.10538 0.17552  
 C -1.14774 4.66588 1.13965  
 H -1.12067 5.18200 2.10681  
 C -1.91762 3.49404 1.01377  
 C -1.17655 2.66087 -2.71834  
 H -1.74718 1.72062 -2.63475  
 C 0.25975 2.29608 -3.15790  
 H 0.88565 3.19765 -3.28606  
 H 0.23934 1.76580 -4.12688  
 H 0.74562 1.63863 -2.41982  
 C -1.85101 3.53991 -3.79744  
 H -2.89499 3.78265 -3.53794  
 H -1.85346 3.02439 -4.77477  
 H -1.31157 4.49552 -3.92649  
 C -2.66584 2.98032 2.24438  
 H -3.24261 2.09672 1.91873  
 C -1.68462 2.52663 3.35052  
 H -0.97768 1.77186 2.97034  
 H -2.23483 2.09521 4.20630  
 H -1.09621 3.38159 3.73049  
 C -3.66743 4.01637 2.80141  
 H -3.15176 4.92396 3.16313  
 H -4.22839 3.59329 3.65375  
 H -4.39644 4.33263 2.03637  
 C 4.49214 -0.13294 -0.05810  
 C 4.72962 1.66419 1.65410  
 H 3.64637 1.44854 1.60739  
 C 5.18995 1.45372 3.10433  
 H 5.06061 0.40336 3.41192  
 H 4.57001 2.07943 3.76729  
 H 6.24046 1.74466 3.26545

C 4.94335 3.09589 1.13778  
 H 4.57011 3.19690 0.10612  
 H 6.00284 3.40146 1.16158  
 H 4.37997 3.79815 1.77414  
 C 6.65722 0.39298 0.45769  
 C 7.81673 1.05388 1.13877  
 H 7.73785 2.15328 1.13213  
 H 8.75093 0.79163 0.61868  
 H 7.92471 0.73297 2.18955  
 C 6.68055 -0.59128 -0.51092  
 C 7.84928 -1.26274 -1.16284  
 H 7.85333 -1.12454 -2.25873  
 H 7.87367 -2.34880 -0.96181  
 H 8.78905 -0.83998 -0.77648  
 C 4.91881 -1.91693 -1.80722  
 H 5.86243 -2.32864 -2.20231  
 C 4.13806 -3.05663 -1.13352  
 H 4.71720 -3.50496 -0.30934  
 H 3.92058 -3.84283 -1.87532  
 H 3.17924 -2.68941 -0.72916  
 C 4.14897 -1.26829 -2.96876  
 H 3.19175 -0.84777 -2.61585  
 H 3.93049 -2.02925 -3.73623  
 H 4.73630 -0.46028 -3.43556  
 C 0.39388 -0.05391 -0.03008

### III<sub>Au,N</sub>

SCF (BP86) Energy = -2354.14103361  
 Enthalpy 0K = -2352.858126  
 Enthalpy 298K = -2352.857182  
 Free Energy 298K = -2353.040720  
 Lowest Frequency = 19.3299 cm<sup>-1</sup>  
 Second Frequency = 25.5126 cm<sup>-1</sup>  
 SCF (BP86-D3BJ) Energy = -2354.54642653  
 SCF (C6H6) Energy = -2354.14510527  
 SCF (BS2) Energy = -3166.34475727

Au 1.32509 0.08953 0.58100  
 Si -3.37984 1.56852 -1.83781  
 Si -3.94629 -1.77836 0.38190  
 Al -1.32600 0.25137 0.29796  
 N -1.74960 1.51722 -1.06764  
 N -2.18482 -1.45614 0.15820  
 N 3.61687 -1.57583 -0.82948  
 N 4.23260 0.48418 -0.50277  
 N -1.19080 0.90763 2.11583  
 N 1.11506 0.99591 3.04524  
 C -0.85873 2.57208 -1.52714  
 C -0.77172 3.83240 -0.83897  
 C 0.04172 4.86459 -1.34710  
 H 0.08561 5.81500 -0.80270  
 C 0.77165 4.71753 -2.52836  
 H 1.38331 5.53889 -2.91757  
 C 0.69801 3.49726 -3.20230  
 H 1.26674 3.36360 -4.12989  
 C -0.08931 2.42547 -2.73202  
 C -1.52651 4.13296 0.45286  
 H -2.19237 3.27373 0.63325  
 C -0.54766 4.25473 1.64236  
 H 0.06702 3.34927 1.75647  
 H -1.09813 4.42471 2.58611  
 H 0.13208 5.11433 1.49937  
 C -2.38409 5.41810 0.37580  
 H -1.75138 6.32193 0.31977  
 H -3.00598 5.51716 1.28397  
 H -3.05111 5.42509 -0.49950  
 C -0.04295 1.14236 -3.56317  
 H -0.78106 0.44289 -3.13737  
 C 1.35532 0.48992 -3.46875  
 H 2.13778 1.19434 -3.80523  
 H 1.41751 -0.40473 -4.11300  
 H 1.58548 0.19651 -2.43123

C -0.38736 1.38862 -5.05123  
H -1.31122 1.97611 -5.17500  
H -0.51556 0.42893 -5.58260  
H 0.42105 1.93874 -5.56539  
C -3.93647 3.36905 -2.13698  
H -4.26456 3.85005 -1.20145  
H -4.79669 3.36259 -2.82979  
H -3.14415 3.98929 -2.58527  
C -3.54555 0.72733 -3.54727  
H -3.06094 1.31948 -4.33852  
H -4.62132 0.66725 -3.79522  
H -3.13666 -0.29359 -3.58717  
C -4.75650 0.79848 -0.74564  
H -4.65554 1.14576 0.30081  
H -5.65722 1.32767 -1.12094  
C -4.99152 -0.72959 -0.81931  
H -4.84381 -1.09546 -1.85201  
H -6.04665 -0.96371 -0.56911  
C -4.65804 -1.42005 2.12229  
H -4.11381 -1.96948 2.90710  
H -5.70252 -1.78262 2.13119  
H -4.68296 -0.35706 2.40254  
C -4.35577 -3.62859 0.14920  
H -3.97088 -4.07391 -0.77834  
H -5.45495 -3.74101 0.15846  
H -3.95359 -4.22302 0.98645  
C -1.45164 -2.69224 -0.02117  
C -0.93375 -3.41748 1.10334  
C -0.37261 -4.69681 0.91241  
H -0.00705 -5.24855 1.78688  
C -0.30569 -5.29263 -0.35152  
H 0.10059 -6.30301 -0.47293  
C -0.77674 -4.57480 -1.45688  
H -0.73038 -5.03041 -2.45358  
C -1.33035 -3.28559 -1.32375  
C -1.00948 -2.88316 2.53384  
H -1.47224 -1.88378 2.48233  
C 0.39406 -2.72627 3.15971  
H 0.91723 -3.69758 3.22668  
H 0.31564 -2.32235 4.18500  
H 1.01874 -2.03221 2.57232  
C -1.88644 -3.77961 3.43913  
H -2.89831 -3.92167 3.02482  
H -1.98876 -3.33260 4.44419  
H -1.43904 -4.78179 3.56718  
C -1.79099 -2.57290 -2.59630  
H -2.08218 -1.55257 -2.29342  
C -0.64150 -2.46525 -3.62090  
H 0.25517 -2.01696 -3.16755  
H -0.94408 -1.83894 -4.47886  
H -0.36077 -3.45626 -4.02101  
C -3.00592 -3.24562 -3.27691  
H -2.78356 -4.29656 -3.53633  
H -3.26001 -2.72003 -4.21493  
H -3.90242 -3.23974 -2.63832  
C 3.16232 -0.36547 -0.37214  
C 2.77771 -2.80501 -0.76148  
H 1.76862 -2.41499 -0.53871  
C 2.71774 -3.55766 -2.09911  
H 2.54052 -2.86710 -2.93928  
H 1.87261 -4.26220 -2.05643  
H 3.63197 -4.13790 -2.30172  
C 3.21265 -3.69769 0.41179  
H 3.21798 -3.12772 1.35461  
H 4.21543 -4.13139 0.25595  
H 2.49123 -4.52374 0.51522  
C 4.95531 -1.49364 -1.23935  
C 5.76683 -2.61660 -1.81080  
H 5.72016 -3.52672 -1.19070  
H 6.82431 -2.31510 -1.86765  
H 5.44631 -2.89061 -2.83069  
C 5.34216 -0.18588 -1.03092

C 6.66076 0.47091 -1.30132  
H 7.10897 0.90364 -0.38935  
H 6.57983 1.27866 -2.05077  
H 7.37336 -0.26858 -1.69720  
C 4.29368 1.90460 -0.04483  
H 5.24754 2.27773 -0.45350  
C 3.16993 2.75760 -0.64105  
H 3.15494 2.69797 -1.73984  
H 3.32561 3.81042 -0.35417  
H 2.17668 2.45023 -0.27225  
C 4.36576 1.97303 1.48948  
H 3.42880 1.61312 1.95010  
H 4.52492 3.01937 1.80114  
H 5.20459 1.36798 1.87446  
C 0.16936 0.77712 2.19173  
C 1.13349 1.41461 4.45301  
H 0.13494 1.32050 4.92392  
C -1.93907 1.39306 3.30384  
H -1.31467 2.17058 3.78618  
C 1.57614 2.88620 4.57000  
H 2.56975 3.02332 4.10948  
H 0.86887 3.55940 4.05938  
H 1.64074 3.18870 5.63036  
C 2.10173 0.49518 5.22197  
H 3.11672 0.56903 4.79428  
H 2.14882 0.77841 6.28837  
H 1.78138 -0.55722 5.15316  
C -2.17764 0.26807 4.33295  
H -1.24050 -0.25797 4.57670  
H -2.59368 0.68185 5.26932  
H -2.89024 -0.47462 3.94313  
C -3.26307 2.06523 2.91483  
H -3.84992 2.29817 3.81992  
H -3.10146 3.00292 2.36396  
H -3.87594 1.40252 2.28288

**TS (III-IV)<sub>Au,N</sub>**

SCF (BP86) Energy = -2354.11417240  
Enthalpy 0K = -2352.832691  
Enthalpy 298K = -2352.831746  
Free Energy 298K = -2353.015404  
Lowest Frequency = -156.3615 cm<sup>-1</sup>  
Second Frequency = 16.4531 cm<sup>-1</sup>  
SCF (BP86-D3BJ) Energy = -2354.51360756  
SCF (C6H6) Energy = -2354.11790113  
SCF (BS2) Energy = -3166.31872245

Au 1.65371 0.04388 0.83709  
Si -3.32095 1.75866 -1.90853  
Si -4.10769 -1.70871 0.04396  
Al -1.52805 0.27111 0.28677  
N -1.74090 1.60065 -1.05213  
N -2.32993 -1.42504 -0.05980  
N 3.70954 -1.54196 -0.73944  
N 4.38527 0.50619 -0.39261  
N -1.67137 0.81294 2.13945  
N 0.71683 0.54910 2.80823  
C -0.80450 2.66474 -1.37380  
C -0.74807 3.87280 -0.59595  
C 0.10451 4.92546 -0.98385  
H 0.12544 5.83696 -0.37539  
C 0.90363 4.84694 -2.12652  
H 1.54446 5.68476 -2.42252  
C 0.86335 3.67405 -2.88286  
H 1.48841 3.59383 -3.77988  
C 0.03875 2.58431 -2.53372  
C -1.56664 4.08930 0.67484  
H -2.25674 3.23337 0.76219  
C -0.63905 4.09345 1.90996  
H -0.04623 3.16821 1.96836  
H -1.22435 4.19611 2.84223  
H 0.06359 4.94535 1.86604



C -2.39371 5.39606 0.66020  
 H -1.74186 6.28691 0.70187  
 H -3.05413 5.43996 1.54518  
 H -3.02027 5.48540 -0.24024  
 C 0.12623 1.35238 -3.43554  
 H -0.65050 0.64289 -3.10526  
 C 1.50544 0.67122 -3.27947  
 H 2.31830 1.37934 -3.52375  
 H 1.60049 -0.18835 -3.96594  
 H 1.66091 0.32019 -2.24579  
 C -0.10934 1.69054 -4.92644  
 H -1.02073 2.29061 -5.08010  
 H -0.20181 0.76546 -5.52265  
 H 0.73532 2.26464 -5.34776  
 C -3.80897 3.59020 -2.12464  
 H -4.18136 4.02199 -1.18178  
 H -4.62516 3.65231 -2.86626  
 H -2.97483 4.21323 -2.48435  
 C -3.40739 1.02866 -3.67262  
 H -2.84961 1.64674 -4.39295  
 H -4.46579 1.02747 -3.99212  
 H -3.03422 -0.00371 -3.74857  
 C -4.76585 0.96435 -0.92691  
 H -4.68163 1.22201 0.14744  
 H -5.63364 1.55841 -1.28138  
 C -5.05416 -0.54337 -1.13200  
 H -4.86856 -0.83610 -2.18161  
 H -6.12816 -0.75287 -0.94979  
 C -4.87383 -1.39451 1.76577  
 H -4.40239 -2.01387 2.54501  
 H -5.94500 -1.66382 1.72583  
 H -4.81133 -0.34196 2.07983  
 C -4.55732 -3.52318 -0.33572  
 H -4.14052 -3.90738 -1.27724  
 H -5.65812 -3.60321 -0.38586  
 H -4.21054 -4.19110 0.46984  
 C -1.60133 -2.65746 -0.27156  
 C -1.18460 -3.47093 0.83452  
 C -0.61156 -4.73688 0.59538  
 H -0.32033 -5.35539 1.45284  
 C -0.44477 -5.23842 -0.69954  
 H -0.03128 -6.23996 -0.86241  
 C -0.82626 -4.43865 -1.78278  
 H -0.70180 -4.82085 -2.80313  
 C -1.38119 -3.15621 -1.59994  
 C -1.38449 -3.04967 2.29080  
 H -1.81852 -2.03554 2.28088  
 C -0.04418 -2.99129 3.05564  
 H 0.43662 -3.98522 3.10391  
 H -0.21103 -2.65774 4.09591  
 H 0.65844 -2.28654 2.58146  
 C -2.36277 -3.99059 3.03306  
 H -3.33795 -4.05968 2.52379  
 H -2.54056 -3.63118 4.06255  
 H -1.95504 -5.01492 3.10567  
 C -1.73665 -2.34818 -2.84863  
 H -2.00777 -1.33720 -2.49871  
 C -0.52766 -2.22554 -3.80061  
 H 0.36195 -1.85483 -3.26961  
 H -0.75397 -1.52676 -4.62531  
 H -0.26952 -3.19787 -4.25754  
 C -2.93522 -2.92940 -3.63463  
 H -2.74044 -3.97453 -3.93625  
 H -3.11114 -2.34556 -4.55603  
 H -3.86713 -2.91634 -3.04897  
 C 3.31294 -0.33669 -0.20570  
 C 2.83874 -2.74687 -0.67887  
 H 1.84275 -2.32560 -0.45129  
 C 2.74623 -3.48886 -2.02058  
 H 2.60331 -2.78624 -2.85744  
 H 1.86773 -4.15198 -1.98393  
 H 3.63142 -4.11167 -2.22539

C 3.24504 -3.66322 0.48644  
 H 3.26470 -3.10060 1.43375  
 H 4.23721 -4.12015 0.32622  
 H 2.50362 -4.47325 0.58139  
 C 5.02215 -1.46337 -1.23384  
 C 5.78012 -2.58913 -1.86902  
 H 5.75697 -3.50537 -1.25561  
 H 6.83681 -2.30184 -1.98456  
 H 5.39644 -2.84883 -2.87072  
 C 5.44284 -0.16989 -1.01980  
 C 6.74585 0.47864 -1.37168  
 H 7.27116 0.87996 -0.48642  
 H 6.61977 1.30871 -2.09034  
 H 7.41472 -0.25773 -1.84258  
 C 4.51017 1.89943 0.12073  
 H 5.43707 2.27678 -0.34256  
 C 3.36160 2.80321 -0.34014  
 H 3.25084 2.79247 -1.43488  
 H 3.56726 3.83914 -0.02332  
 H 2.39745 2.49634 0.09844  
 C 4.70273 1.89597 1.64701  
 H 3.80118 1.50196 2.14478  
 H 4.87946 2.92498 2.00270  
 H 5.56550 1.27382 1.93978  
 C -0.34732 0.54456 2.03084  
 C 0.89213 0.81737 4.24932  
 H -0.05897 0.63701 4.78787  
 C -2.31384 1.26402 3.40315  
 H -1.58719 1.92195 3.91988  
 C 1.32529 2.27382 4.50391  
 H 2.24823 2.49954 3.94172  
 H 0.55170 2.99031 4.18609  
 H 1.52667 2.43613 5.57776  
 C 1.94665 -0.15903 4.79976  
 H 2.90461 -0.01818 4.26877  
 H 2.11582 0.01417 5.87687  
 H 1.63134 -1.20438 4.65704  
 C -2.64243 0.08504 4.34116  
 H -1.75948 -0.55191 4.51361  
 H -2.99160 0.46026 5.31986  
 H -3.43672 -0.54682 3.91506  
 C -3.56908 2.10080 3.11718  
 H -4.03889 2.41612 4.06485  
 H -3.33108 3.00352 2.53490  
 H -4.31635 1.51869 2.55232

**IV<sub>Au,N</sub>**

SCF (BP86) Energy = -2354.14869572  
 Enthalpy 0K = -2352.865897  
 Enthalpy 298K = -2352.864953  
 Free Energy 298K = -2353.050522  
 Lowest Frequency = 16.0840 cm<sup>-1</sup>  
 Second Frequency = 20.2332 cm<sup>-1</sup>  
 SCF (BP86-D3BJ) Energy = -2354.53649672  
 SCF (C6H6) Energy = -2354.15369109  
 SCF (BS2) Energy = -3166.35422203

Au 2.37229 0.45221 0.80552  
 Si -4.05831 1.11917 -1.93546  
 Si -4.23850 -2.12794 0.46491  
 Al -1.93650 0.15492 0.34791  
 N -2.52482 1.32499 -1.02241  
 N -2.52252 -1.65109 0.22961  
 N 4.22203 -1.40107 -0.74231  
 N 5.09493 0.59103 -0.62254  
 N -1.72237 0.89567 2.13047  
 N 0.75983 1.02075 1.98073  
 C -1.72586 2.46783 -1.42803  
 C -1.91282 3.76626 -0.84167  
 C -1.16078 4.86272 -1.30948  
 H -1.32197 5.84546 -0.85132  
 C -0.22097 4.73425 -2.33467

H 0.34490 5.60317 -2.68832  
 C -0.01863 3.47158 -2.89608  
 H 0.72214 3.35211 -3.69532  
 C -0.74653 2.34267 -2.46969  
 C -2.85998 4.03661 0.32838  
 H -3.42770 3.10666 0.50848  
 C -2.03909 4.36734 1.59616  
 H -1.32853 3.55852 1.82237  
 H -2.69651 4.51624 2.47139  
 H -1.46172 5.29812 1.45142  
 C -3.85702 5.18965 0.06683  
 H -3.33652 6.16156 -0.00287  
 H -4.57610 5.26822 0.90191  
 H -4.42615 5.05075 -0.86437  
 C -0.40551 1.00823 -3.13198  
 H -1.14929 0.26964 -2.78837  
 C 0.99331 0.53621 -2.67610  
 H 1.76528 1.27458 -2.95896  
 H 1.26443 -0.42582 -3.14787  
 H 1.04368 0.41359 -1.57904  
 C -0.45803 1.07229 -4.67501  
 H -1.41868 1.47252 -5.03808  
 H -0.32045 0.06578 -5.10753  
 H 0.34259 1.71519 -5.08270  
 C -4.85932 2.80056 -2.34961  
 H -5.35278 3.24315 -1.46947  
 H -5.63205 2.64358 -3.12303  
 H -4.13129 3.52862 -2.74163  
 C -3.89702 0.25739 -3.63541  
 H -3.36883 0.90471 -4.35432  
 H -4.91123 0.07960 -4.03749  
 H -3.37418 -0.71025 -3.60267  
 C -5.39366 0.17799 -0.93226  
 H -5.45400 0.61676 0.08322  
 H -6.32832 0.51032 -1.43050  
 C -5.36614 -1.36882 -0.87689  
 H -5.09818 -1.78718 -1.86461  
 H -6.38324 -1.75502 -0.65726  
 C -4.96219 -1.53724 2.13182  
 H -4.29471 -1.76713 2.97795  
 H -5.92567 -2.04793 2.31020  
 H -5.16152 -0.45406 2.13687  
 C -4.44609 -4.02428 0.46641  
 H -3.98548 -4.52501 -0.39754  
 H -5.52550 -4.25900 0.46767  
 H -4.00618 -4.47101 1.37309  
 C -1.62392 -2.77732 0.10845  
 C -0.99267 -3.35234 1.26135  
 C -0.23210 -4.53221 1.12825  
 H 0.21757 -4.97427 2.02550  
 C -0.06941 -5.17192 -0.10506  
 H 0.49719 -6.10689 -0.18019  
 C -0.65772 -4.59982 -1.23873  
 H -0.54060 -5.09141 -2.21220  
 C -1.41681 -3.41492 -1.16240  
 C -1.14549 -2.76483 2.66457  
 H -1.69062 -1.81168 2.56161  
 C 0.22616 -2.46306 3.30753  
 H 0.82337 -3.38279 3.44430  
 H 0.08898 -2.01449 4.30762  
 H 0.80862 -1.75820 2.69215  
 C -1.96542 -3.69300 3.59111  
 H -2.97257 -3.89046 3.18894  
 H -2.08304 -3.23766 4.59115  
 H -1.46391 -4.66822 3.72696  
 C -2.00509 -2.86270 -2.46072  
 H -2.44726 -1.88408 -2.20785  
 C -0.91543 -2.64353 -3.53316  
 H -0.08212 -2.03911 -3.14290  
 H -1.33695 -2.12406 -4.41197  
 H -0.49864 -3.60293 -3.88928  
 C -3.11687 -3.75971 -3.05319

H -2.72959 -4.76889 -3.28309  
 H -3.49956 -3.32779 -3.99546  
 H -3.97006 -3.87692 -2.36746  
 C 3.98568 -0.13466 -0.26769  
 C 3.24770 -2.51049 -0.52736  
 H 2.35504 -1.98455 -0.14483  
 C 2.85751 -3.21685 -1.83314  
 H 2.62385 -2.48650 -2.62473  
 H 1.95055 -3.81409 -1.64523  
 H 3.64140 -3.89967 -2.19862  
 C 3.72577 -3.47522 0.56851  
 H 3.96800 -2.92657 1.49304  
 H 4.61143 -4.05696 0.26062  
 H 2.91237 -4.18511 0.79102  
 C 5.47148 -1.47605 -1.37531  
 C 6.04930 -2.70209 -2.01430  
 H 5.99809 -3.58227 -1.35278  
 H 7.11148 -2.53137 -2.24873  
 H 5.54058 -2.96406 -2.95806  
 C 6.02153 -0.21351 -1.29988  
 C 7.33225 0.28893 -1.82109  
 H 7.97153 0.70449 -1.02172  
 H 7.20583 1.07203 -2.59042  
 H 7.88961 -0.53668 -2.28900  
 C 5.32351 2.03112 -0.31725  
 H 6.27299 2.27204 -0.82340  
 C 4.22669 2.92065 -0.92177  
 H 4.13708 2.75501 -2.00773  
 H 4.47952 3.98052 -0.75126  
 H 3.24681 2.71559 -0.45926  
 C 5.51839 2.24458 1.19238  
 H 4.59636 1.98538 1.73889  
 H 5.75989 3.30185 1.39228  
 H 6.34030 1.61967 1.58010  
 C -0.48612 0.72796 1.57130  
 C 1.08887 1.75009 3.23860  
 H 0.16919 1.86808 3.82972  
 C -2.16219 1.42434 3.44651  
 H -1.61136 2.36082 3.66465  
 C 1.62487 3.15734 2.91716  
 H 2.54784 3.08569 2.31422  
 H 0.89046 3.73997 2.33861  
 H 1.86038 3.70952 3.84466  
 C 2.09357 0.95505 4.09098  
 H 3.03171 0.79151 3.52874  
 H 2.33710 1.50236 5.01880  
 H 1.69042 -0.03408 4.36249  
 C -1.90167 0.42078 4.58738  
 H -0.83710 0.14748 4.66399  
 H -2.21786 0.84604 5.55660  
 H -2.47689 -0.50501 4.41656  
 C -3.65456 1.78425 3.39630  
 H -3.95464 2.29787 4.32619  
 H -3.87820 2.44754 2.54697  
 H -4.27025 0.87627 3.30024

**Au,N**

SCF (BP86) Energy = -2354.16684065  
 Enthalpy 0K = -2352.884520  
 Enthalpy 298K = -2352.883576  
 Free Energy 298K = -2353.074473  
 Lowest Frequency = 9.4963 cm<sup>-1</sup>  
 Second Frequency = 12.4068 cm<sup>-1</sup>  
 SCF (BP86-D3BJ) Energy = -2354.54864678  
 SCF (C6H6) Energy = -2354.17328871  
 SCF (BS2) Energy = -3166.37398540

Au -2.91477 -0.30723 -0.44044  
 Si 4.63845 -1.60047 1.28506  
 Si 4.75082 1.73670 -0.74296  
 Al 2.07615 0.05241 0.11244  
 N 3.07928 -1.51386 0.39632

|   |          |          |          |   |          |          |          |
|---|----------|----------|----------|---|----------|----------|----------|
| N | 3.08242  | 1.63764  | -0.07147 | H | 1.87602  | 4.74975  | -3.55160 |
| N | 0.31946  | 0.31706  | 0.84821  | C | 3.16976  | 2.97095  | 2.61312  |
| N | -0.94884 | -0.48894 | -1.08194 | H | 3.22362  | 1.88429  | 2.42121  |
| C | 2.55344  | -2.78944 | -0.03973 | C | 2.37094  | 3.20378  | 3.91652  |
| C | 1.66909  | -3.55077 | 0.79248  | H | 2.75825  | 2.55531  | 4.72209  |
| C | 1.24635  | -4.82959 | 0.37523  | H | 1.29666  | 2.99601  | 3.79170  |
| H | 0.58548  | -5.40878 | 1.03117  | H | 2.46767  | 4.24598  | 4.27045  |
| C | 1.64923  | -5.37950 | -0.84538 | C | 4.61185  | 3.48548  | 2.83263  |
| H | 1.31114  | -6.37668 | -1.14759 | H | 5.27188  | 3.25168  | 1.98473  |
| C | 2.48869  | -4.62873 | -1.67377 | H | 5.05235  | 3.03264  | 3.73934  |
| H | 2.80565  | -5.04375 | -2.63812 | H | 4.61292  | 4.58211  | 2.96900  |
| C | 2.95083  | -3.35299 | -1.29741 | C | -4.86310 | -0.06775 | 0.07396  |
| C | 1.15265  | -3.03897 | 2.13858  | C | -5.00363 | 2.29643  | -0.72848 |
| H | 1.50430  | -1.99849 | 2.24737  | C | -4.88229 | 3.43823  | 0.29285  |
| C | -0.39259 | -3.02775 | 2.17262  | H | -5.86028 | 3.86069  | 0.57715  |
| H | -0.79980 | -2.40483 | 1.35901  | H | -4.28592 | 4.25396  | -0.14819 |
| H | -0.75959 | -2.63092 | 3.13639  | H | -4.36598 | 3.09554  | 1.20340  |
| H | -0.80535 | -4.04651 | 2.06186  | C | -5.70123 | 2.70852  | -2.03399 |
| C | 1.70133  | -3.85996 | 3.32831  | H | -5.79867 | 1.84993  | -2.71799 |
| H | 1.31816  | -3.46271 | 4.28575  | H | -5.09037 | 3.47611  | -2.53721 |
| H | 2.80266  | -3.83614 | 3.36974  | H | -6.69984 | 3.14285  | -1.86481 |
| H | 1.39380  | -4.91903 | 3.25944  | C | -5.39470 | -2.35468 | 1.05231  |
| C | 3.87200  | -2.61360 | -2.26604 | C | -4.33813 | -2.37412 | 2.16709  |
| H | 4.16490  | -1.67808 | -1.76229 | H | -3.37342 | -1.98826 | 1.79850  |
| C | 3.13750  | -2.24529 | -3.57502 | H | -4.18704 | -3.40986 | 2.51348  |
| H | 3.80129  | -1.67971 | -4.25337 | H | -4.65595 | -1.76208 | 3.02749  |
| H | 2.24675  | -1.62678 | -3.37400 | C | -5.00331 | -3.20574 | -0.16566 |
| H | 2.80143  | -3.15014 | -4.11236 | H | -5.79122 | -3.18460 | -0.93680 |
| C | 5.16164  | -3.40179 | -2.58668 | H | -4.85066 | -4.25155 | 0.14878  |
| H | 4.93921  | -4.35160 | -3.10506 | H | -4.06521 | -2.83540 | -0.61244 |
| H | 5.72945  | -3.64683 | -1.67369 | C | 0.16953  | -0.18387 | -0.40550 |
| H | 5.82052  | -2.81074 | -3.24764 | C | -0.71950 | 0.70992  | 1.81571  |
| C | 5.19787  | -3.41414 | 1.46655  | H | -1.61479 | 0.06617  | 1.65047  |
| H | 4.43469  | -4.04316 | 1.95113  | C | -1.14009 | 2.17469  | 1.58729  |
| H | 6.11345  | -3.44936 | 2.08318  | H | -0.27657 | 2.85047  | 1.70599  |
| H | 5.42710  | -3.87480 | 0.49212  | H | -1.92365 | 2.47232  | 2.30847  |
| C | 4.47361  | -0.86791 | 3.03966  | H | -1.53577 | 2.31124  | 0.56673  |
| H | 4.14054  | 0.18276  | 3.02304  | C | -0.21287 | 0.48028  | 3.24543  |
| H | 5.44653  | -0.89941 | 3.56217  | H | 0.72283  | 1.03723  | 3.41403  |
| H | 3.74760  | -1.44193 | 3.63946  | H | -0.00792 | -0.58513 | 3.43077  |
| C | 6.06815  | -0.70106 | 0.38277  | H | -0.95581 | 0.82494  | 3.98625  |
| H | 6.98989  | -1.04947 | 0.89477  | C | -0.74318 | -1.17113 | -2.38801 |
| H | 6.13539  | -1.11348 | -0.64216 | H | 0.30824  | -0.97376 | -2.66991 |
| C | 6.05055  | 0.84323  | 0.34561  | C | -1.65774 | -0.59847 | -3.48371 |
| H | 7.02477  | 1.21779  | -0.03395 | H | -2.72041 | -0.79861 | -3.25129 |
| H | 5.96713  | 1.24592  | 1.37245  | H | -1.42890 | -1.06852 | -4.45662 |
| C | 5.32068  | 3.55491  | -0.87355 | H | -1.52821 | 0.49099  | -3.58352 |
| H | 4.60485  | 4.16628  | -1.44548 | C | -0.92700 | -2.69164 | -2.24930 |
| H | 6.28831  | 3.57777  | -1.40627 | H | -0.23474 | -3.10516 | -1.49926 |
| H | 5.46026  | 4.04619  | 0.10144  | H | -0.74159 | -3.20017 | -3.21213 |
| C | 4.87114  | 1.04498  | -2.52030 | H | -1.96214 | -2.92279 | -1.93478 |
| H | 4.35383  | 0.08204  | -2.64340 | H | -7.71893 | 2.89093  | 0.67507  |
| H | 5.93013  | 0.89574  | -2.79835 | N | -5.60549 | 1.07206  | -0.12751 |
| H | 4.43228  | 1.75334  | -3.24243 | N | -5.73090 | -0.95891 | 0.64973  |
| C | 2.43424  | 2.91735  | 0.11894  | H | -3.98143 | 1.96002  | -0.98172 |
| C | 1.75194  | 3.56601  | -0.96244 | H | -6.33591 | -2.75563 | 1.46324  |
| C | 1.20293  | 4.84997  | -0.77214 | C | -6.92445 | 0.89871  | 0.31965  |
| H | 0.69464  | 5.33832  | -1.61237 | C | -8.01368 | 1.92426  | 0.23537  |
| C | 1.30103  | 5.51877  | 0.45081  | H | -8.89707 | 1.57146  | 0.78939  |
| H | 0.87973  | 6.52253  | 0.57449  | H | -8.33350 | 2.11325  | -0.80407 |
| C | 1.94380  | 4.88066  | 1.51670  | C | -7.00083 | -0.38830 | 0.81073  |
| H | 2.01704  | 5.39414  | 2.48190  | C | -8.16623 | -1.11423 | 1.40833  |
| C | 2.50288  | 3.59378  | 1.38401  | H | -8.45321 | -2.00378 | 0.81931  |
| C | 1.59531  | 2.92920  | -2.34550 | H | -9.04382 | -0.45111 | 1.44218  |
| H | 2.05459  | 1.92651  | -2.30028 | H | -7.96723 | -1.44676 | 2.44274  |
| C | 0.10794  | 2.75010  | -2.72262 |   |          |          |          |
| H | -0.41282 | 3.72349  | -2.77684 |   |          |          |          |
| H | -0.41578 | 2.11543  | -1.99031 |   |          |          |          |
| H | 0.02055  | 2.27371  | -3.71580 |   |          |          |          |
| C | 2.31535  | 3.74127  | -3.44739 |   |          |          |          |
| H | 2.22143  | 3.23595  | -4.42541 |   |          |          |          |
| H | 3.38885  | 3.86998  | -3.23306 |   |          |          |          |

**S<sub>Au,N</sub>**  
 SCF (BP86) Energy = -2354.20072914  
 Enthalpy 0K = -2352.917918  
 Enthalpy 298K = -2352.916974  
 Free Energy 298K = -2353.103666  
 Lowest Frequency = 11.9969 cm<sup>-1</sup>

Second Frequency = 15.9411 cm<sup>-1</sup>  
SCF (BP86-D3BJ) Energy = -2354.59488379  
SCF (C6H6) Energy = -2354.20672469  
SCF (BS2) Energy = -3166.40603146

Au -2.74596 0.00311 -0.06123  
Si 4.26301 1.59134 1.22491  
Al 1.74493 0.00271 0.01455  
Si 4.22698 -1.40074 -1.38351  
N 2.76874 1.57949 0.22027  
N 2.85094 -1.50813 -0.22546  
N 0.16568 0.34161 -1.08446  
N -5.66283 -1.07332 -0.35333  
N 0.07800 -0.35447 1.01527  
N -5.68051 0.93463 0.46676  
C -0.67086 0.00989 -0.06414  
C -4.83099 -0.04229 0.00867  
C -7.01997 0.52573 0.39176  
C 1.43817 3.66172 0.67963  
C 2.27921 2.88141 -0.18271  
C -7.00871 -0.74918 -0.12887  
C 1.64998 -3.68921 -0.58343  
C 2.50550 -2.84673 0.20219  
C 2.66298 3.45657 -1.44337  
C -0.53446 -0.88399 2.23823  
H -1.58911 -0.53009 2.24860  
C 0.98578 -3.23101 -1.88404  
H 1.23694 -2.16639 -2.03108  
C 0.95052 3.16229 2.04046  
H 1.32793 2.13359 2.16673  
C 3.05999 -3.39416 1.40979  
C -0.22897 0.96239 -2.35522  
H 0.72660 1.14485 -2.87862  
C 1.49525 4.02544 3.20242  
H 2.59622 4.08085 3.19250  
H 1.18314 3.60920 4.17736  
H 1.11240 5.06034 3.14566  
C 3.93415 1.13532 3.05406  
H 3.38716 1.93329 3.58192  
H 4.89706 0.98645 3.57636  
H 3.35541 0.20407 3.16019  
C -5.22126 -2.39399 -0.88632  
H -6.15897 -2.94663 -1.06147  
C 5.01651 3.34444 1.28958  
H 5.41826 3.68957 0.32471  
H 5.84787 3.33763 2.01730  
H 4.28000 4.09331 1.62318  
C 1.03724 4.95609 0.29069  
H 0.40320 5.53910 0.96948  
C 5.60731 0.36792 0.58899  
H 6.56883 0.88894 0.77855  
H 5.62076 -0.50819 1.26081  
C -0.56574 -2.42497 2.25507  
H -1.10898 -2.81239 1.37749  
H -1.07148 -2.79247 3.16674  
H 0.45225 -2.84789 2.22670  
C -0.55319 -3.34462 -1.80491  
H -0.87048 -4.38478 -1.61010  
H -1.01490 -3.03064 -2.75770  
H -0.95781 -2.70460 -1.00441  
C 5.10551 -3.08740 -1.54088  
H 5.65993 -3.37173 -0.63288  
H 5.83100 -3.02638 -2.37201  
H 4.39936 -3.90328 -1.76359  
C 3.95512 -2.58854 2.35203  
H 3.93505 -1.54763 1.99100  
C -8.17879 1.37450 0.81476  
H -8.13922 1.63651 1.88726  
H -9.12061 0.82980 0.64793  
H -8.24062 2.31675 0.24144  
C 1.43447 5.51766 -0.92538  
H 1.12052 6.52924 -1.20488

C -1.06419 0.03480 -3.25848  
H -2.04024 -0.18284 -2.78865  
H -0.54373 -0.91952 -3.43571  
H -1.25459 0.51615 -4.23434  
C 1.40269 -5.01515 -0.17403  
H 0.75593 -5.64744 -0.79407  
C -0.92017 2.32815 -2.17565  
H -1.08075 2.81257 -3.15538  
H -0.31446 2.99943 -1.54732  
H -1.90725 2.19277 -1.69802  
C 0.16327 -0.32977 3.48969  
H 1.23268 -0.59940 3.49440  
H -0.29174 -0.74743 4.40476  
H 0.09187 0.76776 3.53661  
C 3.63984 -0.95739 -3.15220  
H 3.17049 -1.82131 -3.65021  
H 4.49991 -0.63993 -3.76957  
H 2.90774 -0.13299 -3.15563  
C -8.15176 -1.66911 -0.42782  
H -8.20342 -1.94114 -1.49726  
H -9.10283 -1.17824 -0.17076  
H -8.10075 -2.60649 0.15454  
C -0.59256 3.11209 2.10545  
H -1.03286 4.11542 1.96291  
H -0.92874 2.74282 3.09161  
H -1.00069 2.44286 1.33083  
C 2.23888 4.75777 -1.77871  
H 2.55336 5.18393 -2.73850  
C 2.78306 -4.72823 1.76923  
H 3.22686 -5.13061 2.68744  
C 5.54530 -0.08751 -0.88541  
H 6.51329 -0.54755 -1.17415  
H 5.43439 0.78477 -1.55250  
C 1.96464 -5.54838 0.98833  
H 1.76631 -6.58487 1.28213  
C -4.49914 -2.24183 -2.23229  
H -3.54504 -1.70489 -2.10288  
H -5.11875 -1.68842 -2.95729  
H -4.28012 -3.23903 -2.64839  
C 3.53274 2.72177 -2.46538  
H 3.60799 1.67759 -2.12190  
C 3.44167 -2.61170 3.81024  
H 2.37717 -2.33539 3.87682  
H 4.02016 -1.90758 4.43401  
H 3.55015 -3.61374 4.26255  
C 5.42311 -3.07462 2.33060  
H 5.49068 -4.13617 2.62943  
H 6.03812 -2.48810 3.03682  
H 5.87631 -2.98009 1.33119  
C 1.50241 -4.03007 -3.10386  
H 2.59967 -3.97903 -3.19536  
H 1.06264 -3.64188 -4.04042  
H 1.22818 -5.09757 -3.02576  
C 2.92105 2.72786 -3.88594  
H 2.94975 3.73625 -4.33613  
H 1.86974 2.39783 -3.88906  
H 3.49269 2.05720 -4.55105  
C -4.39894 -3.16354 0.15849  
H -4.15806 -4.16852 -0.22556  
H -4.95831 -3.27482 1.10223  
H -3.45343 -2.63684 0.37250  
C 4.96378 3.30391 -2.54782  
H 5.55436 2.77749 -3.31930  
H 5.50460 3.21537 -1.59302  
H 4.93558 4.37447 -2.81953  
C -5.26230 2.25683 1.01451  
H -6.20936 2.75899 1.27204  
C -4.54735 3.10335 -0.04782  
H -3.58507 2.64443 -0.32825  
H -4.34534 4.10933 0.35565  
H -5.16381 3.20805 -0.95593  
C -4.44444 2.08569 2.30383

H -4.99872 1.49332 3.05084  
H -4.22329 3.07528 2.73652  
H -3.48817 1.57796 2.09182

**CAAC<sub>cu</sub>**

SCF (BP86) Energy = -2325.83210865  
Enthalpy 0K = -2324.588619  
Enthalpy 298K = -2324.587675  
Free Energy 298K = -2324.767698  
Lowest Frequency = 11.7321 cm<sup>-1</sup>  
Second Frequency = 18.6807 cm<sup>-1</sup>  
SCF (BP86-D3BJ) Energy = -2326.21387528  
SCF (C6H6) Energy = -2325.83592901  
SCF (BS2) Energy = -3138.01898184

Cu 0.90289 -0.64430 0.07948  
Si -4.59339 -1.00741 -0.03669  
Si -3.39337 2.39785 1.50418  
Al -1.39970 0.12781 0.18300  
N -2.80077 -1.15412 0.11429  
N -2.04446 1.89533 0.43371  
N 3.85242 -1.01578 -0.28834  
C -2.31677 -2.51567 0.10116  
C -2.07535 -3.20085 -1.13377  
C -1.61207 -4.53185 -1.10772  
H -1.43539 -5.05162 -2.05716  
C -1.37997 -5.20510 0.09703  
H -1.02594 -6.24185 0.09544  
C -1.61537 -4.53711 1.30490  
H -1.44246 -5.06222 2.25153  
C -2.08507 -3.20942 1.33372  
C -2.32153 -2.53797 -2.49125  
H -2.76151 -1.54816 -2.28791  
C -3.32032 -3.34025 -3.35531  
H -2.91168 -4.32677 -3.63867  
H -3.54757 -2.79772 -4.29034  
H -4.26994 -3.51756 -2.82261  
C -1.00980 -2.29886 -3.27097  
H -0.31521 -1.66791 -2.68863  
H -1.21596 -1.78977 -4.22955  
H -0.49716 -3.25076 -3.50006  
C -2.33124 -2.53853 2.68646  
H -2.91374 -1.62302 2.48078  
C -3.15003 -3.41337 3.66003  
H -2.59249 -4.31352 3.97498  
H -4.09766 -3.75082 3.20736  
H -3.39140 -2.84398 4.57481  
C -0.99977 -2.10601 3.34281  
H -1.18034 -1.57179 4.29317  
H -0.42459 -1.44025 2.67229  
H -0.36706 -2.98545 3.56149  
C -5.40445 -2.69474 0.32900  
H -5.01454 -3.49599 -0.31917  
H -6.49344 -2.61905 0.16141  
H -5.24480 -3.00599 1.37467  
C -5.19081 -0.47251 -1.77419  
H -4.67477 0.42833 -2.14306  
H -6.27040 -0.24075 -1.72540  
H -5.05627 -1.27018 -2.52207  
C -5.36509 0.23387 1.19169  
H -6.45335 0.02610 1.11698  
H -5.08682 -0.05523 2.22288  
C -5.10026 1.73635 0.95159  
H -5.83279 2.34338 1.52373  
H -5.26693 2.00233 -0.10957  
C -3.12926 1.75084 3.28562  
H -2.88227 0.67498 3.28846  
H -4.04953 1.88079 3.88304  
H -2.31397 2.28112 3.80492  
C -3.54985 4.29596 1.52138  
H -2.63696 4.79633 1.87905  
H -4.38205 4.58791 2.18584

H -3.76817 4.68573 0.51299  
C -1.31020 2.93324 -0.24944  
C -1.56896 3.20824 -1.63074  
C -0.82782 4.20466 -2.29682  
H -1.03816 4.40586 -3.35424  
C 0.15591 4.94734 -1.63669  
H 0.71850 5.72334 -2.16764  
C 0.39929 4.69501 -0.28073  
H 1.16204 5.28063 0.24459  
C -0.31580 3.71216 0.42891  
C -2.65904 2.47212 -2.40701  
H -3.12413 1.76661 -1.69739  
C -2.08362 1.65224 -3.58223  
H -1.59236 2.30474 -4.32641  
H -2.88455 1.09641 -4.10191  
H -1.33255 0.92343 -3.23156  
C -3.76227 3.43560 -2.89991  
H -4.20335 4.00331 -2.06307  
H -4.57387 2.87679 -3.39967  
H -3.36607 4.16763 -3.62627  
C 0.00777 3.48287 1.90423  
H -0.84313 2.93409 2.33938  
C 1.24877 2.58115 2.06140  
H 1.10033 1.61446 1.54386  
H 1.44947 2.37583 3.12826  
H 2.14453 3.05870 1.62748  
C 0.19201 4.78732 2.70936  
H 1.10439 5.33282 2.40898  
H 0.29294 4.55862 3.78504  
H -0.66156 5.47548 2.58594  
C 2.64330 -1.54058 -0.11242  
C 2.76502 -3.06532 -0.23218  
C 2.15673 -3.71597 1.03268  
H 2.30261 -4.81051 0.99272  
H 1.07485 -3.51758 1.10164  
H 2.64104 -3.33914 1.95030  
C 1.99241 -3.56906 -1.47421  
H 2.35987 -3.11610 -2.41027  
H 0.91906 -3.34386 -1.38079  
H 2.10408 -4.66465 -1.55727  
C 4.29857 -3.33888 -0.32510  
H 4.68314 -3.65067 0.66268  
H 4.53766 -4.14407 -1.03941  
C 4.95795 -2.00563 -0.73460  
C 6.30759 -1.75550 -0.04621  
H 6.68117 -0.73674 -0.24009  
H 7.04533 -2.46688 -0.45447  
H 6.26052 -1.91475 1.04070  
C 5.16219 -1.89263 -2.25962  
H 4.23314 -2.08106 -2.81927  
H 5.90696 -2.64293 -2.57550  
H 5.54779 -0.89966 -2.54063  
C 4.15366 0.39604 -0.08067  
C 4.61667 0.78816 1.20828  
C 4.97518 2.13688 1.39205  
H 5.33345 2.46454 2.37305  
C 4.86776 3.06758 0.35166  
H 5.15661 4.11090 0.51660  
C 4.36514 2.66680 -0.88969  
H 4.24252 3.40701 -1.68657  
C 3.99367 1.32953 -1.13839  
C 4.67210 -0.16798 2.40522  
H 4.58345 -1.19891 2.02397  
C 3.46609 0.05588 3.34625  
H 3.47283 1.07877 3.76012  
H 3.50287 -0.65463 4.19100  
H 2.51197 -0.08653 2.81279  
C 5.99648 -0.06997 3.19390  
H 6.87775 -0.19639 2.54303  
H 6.03026 -0.84854 3.97544  
H 6.09557 0.90336 3.70452  
C 3.36836 0.97867 -2.48904

|   |         |          |          |
|---|---------|----------|----------|
| H | 3.26217 | -0.11660 | -2.54346 |
| C | 1.94625 | 1.57477  | -2.59312 |
| H | 1.29331 | 1.19090  | -1.78726 |
| H | 1.48889 | 1.30529  | -3.56121 |
| H | 1.95537 | 2.67488  | -2.51369 |
| C | 4.23788 | 1.43142  | -3.68318 |
| H | 4.30695 | 2.53148  | -3.74052 |
| H | 3.79088 | 1.08352  | -4.63020 |
| H | 5.26737 | 1.03760  | -3.62562 |

## References

1. R. J. Schwamm, M. P. Coles, M. S. Hill, M. F. Mahon, C. L. McMullin, N. A. Rajabi, A. S. S. Wilson, *Angew. Chem. Int. Ed.* **2020**, *59*, 3928.
2. N. Kuhn, T. Kratz, *Synthesis* **1993**, *6*, 561.
3. R. Hamze, S. Shi, S. C. Kapper, D. S. M. Ravinson, L. Estergreen, M. -C. Jung, A. C. Tadle, R. Haiges, P. I. Djurovich, J. L. Peltier, R. Jazzar, G. Bertrand, S. E. Bradforth, M. E. Thompson, *J. Am. Chem. Soc.*, **2019**, *141*, 8616
4. B. R. Dible and M. S. Sigman, *J. Am. Chem. Soc.* **2003**, *125*, 872–873.
5. O. V. Dolomanov, L. J. Bourhis, R. J. Gildea, J. A. K. Howard, H. Puschmann, *J. Appl. Cryst.* **2009**, *42*, 339-341.
6. L. J. Bourhis, O. V. Dolomanov, R. J. Gildea, J. A. K. Howard, H. Puschmann, *Acta Cryst. a-Foundation and Advances*, **2015**, *71*, 59-75.
7. G. M. Sheldrick, *Acta Cryst. Sect. C-Structural Chemistry*, **2015**, *71*, 3-8.
8. Gaussian 09, Revision D.01, M. J. Frisch, G. W. Trucks, H. B. Schlegel, G. E. Scuseria, M. A. Robb, J. R. Cheeseman, G. Scalmani, V. Barone, B. Mennucci, G. A. Petersson, H. Nakatsuji, M. Caricato, X. Li, H. P. Hratchian, A. F. Izmaylov, J. Bloino, G. Zheng, J. L. Sonnenberg, M. Hada, M. Ehara, K. Toyota, R. Fukuda, J. Hasegawa, M. Ishida, T. Nakajima, Y. Honda, O. Kitao, H. Nakai, T. Vreven, J. A. Montgomery, Jr., J. E. Peralta, F. Ogliaro, M. Bearpark, J. J. Heyd, E. Brothers, K. N. Kudin, V. N. Staroverov, T. Keith, R. Kobayashi, J. Normand, K. Raghavachari, A. Rendell, J. C. Burant, S. S. Iyengar, J. Tomasi, M. Cossi, N. Rega, J. M. Millam, M. Klene, J. E. Knox, J. B. Cross, V. Bakken, C. Adamo, J. Jaramillo, R. Gomperts, R. E. Stratmann, O. Yazyev, A. J. Austin, R. Cammi, C. Pomelli, J. W. Ochterski, R. L. Martin, K. Morokuma, V. G. Zakrzewski, G. A. Voth, P. Salvador, J. J. Dannenberg, S. Dapprich, A. D. Daniels, O. Farkas, J. B. Foresman, J. V. Ortiz, J. Cioslowski, and D. J. Fox, Gaussian, Inc., Wallingford CT, 2013.
9. Andrae, D.; Häußermann, U.; Dolg, M.; Stoll, H.; Preuß, H., Energy-adjusted ab initio pseudopotentials for the second and third row transition elements. *Theoretica chimica acta*

- 1990, 77 (2), 123-141.
10. Hehre, W. J.; Ditchfield, R.; Pople, J. A., Self—Consistent Molecular Orbital Methods. XII. Further Extensions of Gaussian—Type Basis Sets for Use in Molecular Orbital Studies of Organic Molecules. *J. Chem. Phys.* **1972**, 56 (5), 2257-2261.
  11. Hariharan, P. C.; Pople, J. A., The influence of polarization functions on molecular orbital hydrogenation energies. *Theoretica chimica acta* **1973**, 28 (3), 213-222.
  12. Höllwarth, A.; Böhme, M.; Dapprich, S.; Ehlers, A. W.; Gobbi, A.; Jonas, V.; Köhler, K. F.; Stegmann, R.; Veldkamp, A.; Frenking, G., A set of d-polarization functions for pseudo-potential basis sets of the main group elements Al-Bi and f-type polarization functions for Zn, Cd, Hg. *Chem. Phys. Lett.* **1993**, 208 (3), 237-240.
  13. Becke, A. D., Density-functional exchange-energy approximation with correct asymptotic behavior. *Phys. Rev. A* **1988**, 38 (6), 3098-3100.
  14. Perdew, J. P., Density-functional approximation for the correlation energy of the inhomogeneous electron gas. *Phys. Rev. B* **1986**, 33 (12), 8822-8824.
  15. Cancès, E.; Mennucci, B.; Tomasi, J., A new integral equation formalism for the polarizable continuum model: Theoretical background and applications to isotropic and anisotropic dielectrics. *J. Chem. Phys.* **1997**, 107 (8), 3032-3041.
  16. Grimme, S.; Ehrlich, S.; Goerigk, L., Effect of the damping function in dispersion corrected density functional theory. *J. Comp. Chem.* **2011**, 32 (7), 1456-1465.
  17. Keith, T. A. AIMAll Version 19.10.12; TK Gristmill Software: Overland Park KS, USA, , 2019.
  18. NBO 7.0. E. D. Glendening, J. K. Badenhoop, A. E. Reed, J. E. Carpenter, J. A. Bohmann, C. M. Morales, P. Karafiloglou, C. R. Landis, and F. Weinhold, Theoretical Chemistry Institute, University of Wisconsin, Madison, 2018.
  19. Gaussian 16, Revision C.01, M. J. Frisch, G. W. Trucks, H. B. Schlegel, G. E. Scuseria, M. A. Robb, J. R. Cheeseman, G. Scalmani, V. Barone, G. A. Petersson, H. Nakatsuji, X. Li,



- M. Caricato, A. V. Marenich, J. Bloino, B. G. Janesko, R. Gomperts, B. Mennucci, H. P. Hratchian, J. V. Ortiz, A. F. Izmaylov, J. L. Sonnenberg, D. Williams-Young, F. Ding, F. Lipparini, F. Egidi, J. Goings, B. Peng, A. Petrone, T. Henderson, D. Ranasinghe, V. G. Zakrzewski, J. Gao, N. Rega, G. Zheng, W. Liang, M. Hada, M. Ehara, K. Toyota, R. Fukuda, J. Hasegawa, M. Ishida, T. Nakajima, Y. Honda, O. Kitao, H. Nakai, T. Vreven, K. Throssell, J. A. Montgomery, Jr., J. E. Peralta, F. Ogliaro, M. J. Bearpark, J. J. Heyd, E. N. Brothers, K. N. Kudin, V. N. Staroverov, T. A. Keith, R. Kobayashi, J. Normand, K. Raghavachari, A. P. Rendell, J. C. Burant, S. S. Iyengar, J. Tomasi, M. Cossi, J. M. Millam, M. Klene, C. Adamo, R. Cammi, J. W. Ochterski, R. L. Martin, K. Morokuma, O. Farkas, J. B. Foresman, and D. J. Fox, Gaussian, Inc., Wallingford CT, 2016.
20. Becke, A. D., Density-functional thermochemistry. III. The role of exact exchange. *The J. Chem. Phys.* **1993**, *98* (7), 5648-5652.
21. Lee, C.; Yang, W.; Parr, R. G., Development of the Colle-Salvetti correlation-energy formula into a functional of the electron density. *Phys. Rev. B* **1988**, *37* (2), 785-789.
22. Zhao, Y.; Truhlar, D. G., The M06 suite of density functionals for main group thermochemistry, thermochemical kinetics, noncovalent interactions, excited states, and transition elements: two new functionals and systematic testing of four M06-class functionals and 12 other functionals. *Theoretical Chemistry Accounts* **2008**, *120* (1), 215-241.
23. Perdew, J. P.; Burke, K.; Ernzerhof, M., Generalized Gradient Approximation Made Simple. *Phys. Rev. Lett.* **1996**, *77* (18), 3865-3868.
24. Adamo, C.; Barone, V., Toward reliable density functional methods without adjustable parameters: The PBE0 model. *J. Chem. Phys.* **1999**, *110* (13), 6158-6170.
25. Tao, J.; Perdew, J. P.; Staroverov, V. N.; Scuseria, G. E., Climbing the Density Functional Ladder: Nonempirical Meta--Generalized Gradient Approximation Designed for Molecules and Solids. *Phys. Rev. Lett.* **2003**, *91* (14), 146401.

26. Chai, J.-D.; Head-Gordon, M., Long-range corrected hybrid density functionals with damped atom-atom dispersion corrections. *Phys. Chem. Chem. Phys.* **2008**, *10* (44), 6615-6620.
